# Supplementary material for: The indispensable contribution of s38 protein to ovarian-eggshell morphogenesis in Drosophila melanogaster
Source: PubMed Central journal article supplement (PMC6208399; doi:10.1038/s41598-018-34532-2), 2018-10-31
Supplement: 41598_2018_34532_MOESM1_ESM.pdf [file 41598_2018_34532_MOESM1_ESM.pdf]

*Supplementary Information*

**The indispensable contribution of s38 protein to ovarian-eggshell morphogenesis in *Drosophila melanogaster***

**Athanassios D. Velentzas<sup>1</sup>, Panagiotis D. Velentzas<sup>1,a</sup>, Stamatia A. Katarachia<sup>1</sup>, Athanasios K. Anagnostopoulos<sup>2</sup>, Niki E. Sagioglou<sup>1</sup>, Eleni V. Thanou<sup>1</sup>, Maria M. Tsioka<sup>1</sup>, Vassiliki E. Mpakou<sup>1</sup>, Zoe Kollia<sup>3</sup>, Vassilios E. Gavriil<sup>3</sup>, Issidora S. Papassideri<sup>1</sup>, George Th. Tsangaris<sup>2</sup>, Alkiviadis-Constantinos Cefalas<sup>3</sup>, Evangelia Sarantopoulou<sup>3</sup> and Dimitrios J. Stravopodis<sup>1,\*</sup>**

<sup>1</sup>Section of Cell Biology and Biophysics, Department of Biology, School of Science, National and Kapodistrian University of Athens (NKUA), Athens, Greece

<sup>2</sup>Systems Biology Center, Biomedical Research Foundation of the Academy of Athens (BRFAA), Athens, Greece

<sup>3</sup>Theoretical and Physical Chemistry Institute, National Hellenic Research Foundation (NHRF), Athens, Greece

<sup>a</sup>Current Address: Department of Cancer Biology, Medical School, University of Massachusetts, Worcester, Massachusetts (MA), USA

**\*Corresponding Author:**

Dimitrios J. Stravopodis, *BSc, MSc, PhD*, Assistant Professor, Section of Cell Biology and Biophysics, Department of Biology, School of Science, National and Kapodistrian University of Athens (NKUA), Panepistimiopolis, Zografou 157 84, Athens, Greece (GR). Tel.: +30 210 727 4105, Fax: +30 210 727 4742, E-mail: [dstravop@biol.uoa.gr](mailto:dstravop@biol.uoa.gr)

## Figure S1

**Independent validation of eggs' diverse phenotypes with the use of s38-RNAi GD stock line.** (A) Far-off view light-microscopy image of several s38-targeted ( $c355>s38GD\_RNAi$ ) eggs being characterized by diverse dysmorphias in their dorsal appendages. (B, C) Representative s38GD-downregulated eggs with short and thin dorsal appendages that also lack the typical paddle-shaped tips. (D, E) Eggs derived from s38GD-targeted flies with comparatively longer, but always shorter, dorsal appendages, as compared to the ones of control eggs. Total number of eggs examined from the  $c355>s38GD\_RNAi$  flies: 368. (F) Eclosion-efficiency graphs of both control ( $c355-GAL4/+$ ) (n=60) and s38-downregulated ( $c355>s38GD\_RNAi$ ) (n=60) flies, for a thirty-days period. DA: Dorsal Appendage(s). Scale Bars: 50  $\mu$ m.

c355>s38GD\_RNAi

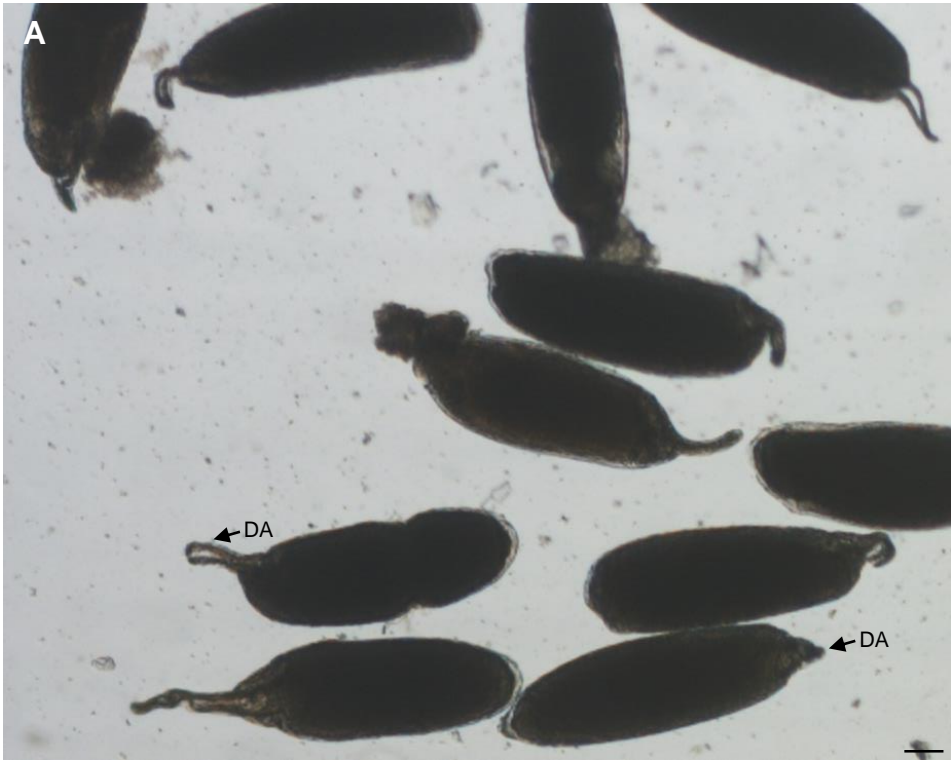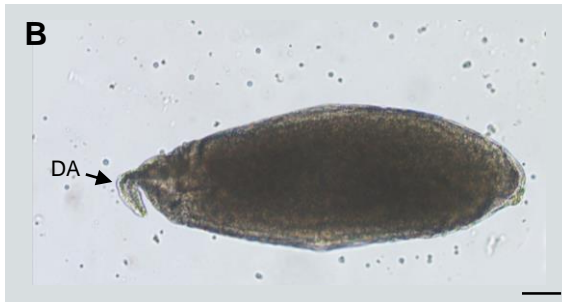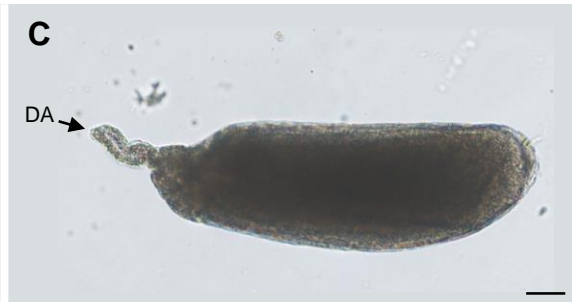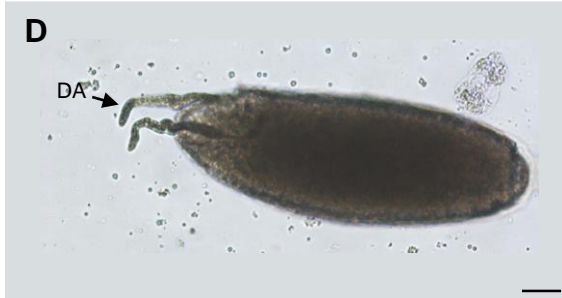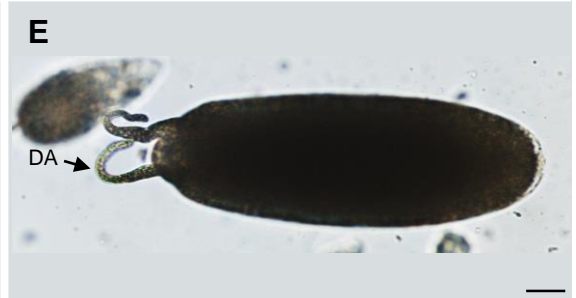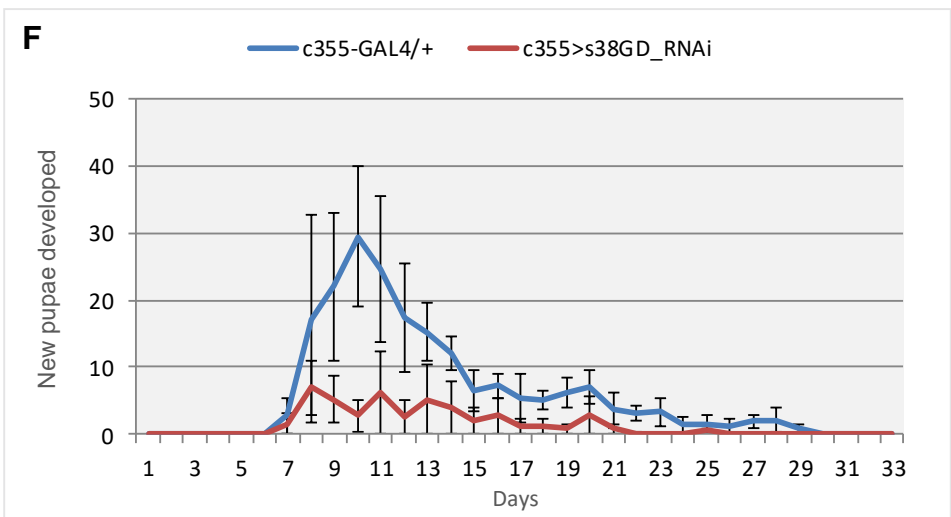

## Figure S2

**The importance of s38 protein in the maintenance of egg's elliptical shape.** Box-plot graphical presentations of the main-body egg (A) length and (B) length to width ratio (excluding the dorsal appendages) between control (n=121) and s38-targeted (n=133) laid eggs. \*:  $p < 0.05$ .

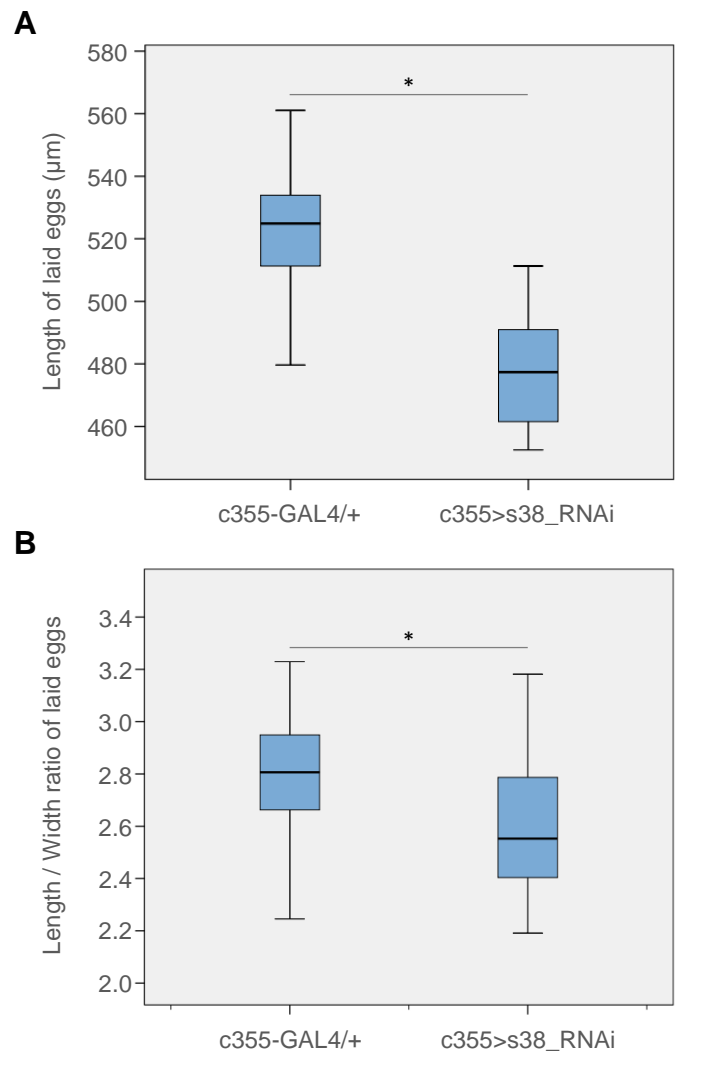

### **Figure S3**

**s38-targeted eggs appear with unaffected vitelline-membrane permeability.** Light-microscopy images of (A) control (*c355-GAL4/+*) (n=102) and (B) s38-downregulated (*c355>s38\_RNAi*) (n=138) laid de-chorionated eggs, after their incubation with neutral red, demonstrating their impermeability to the dye. E: Embryo. Scale Bars: 50  $\mu$ m.

c355-GAL4/+

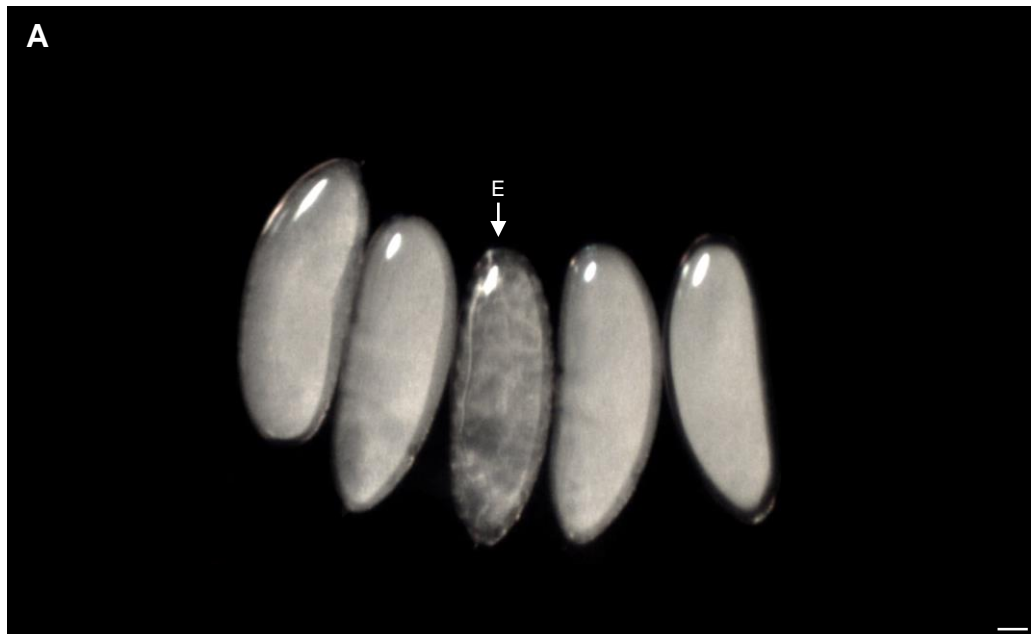

c355>s38\_RNAi

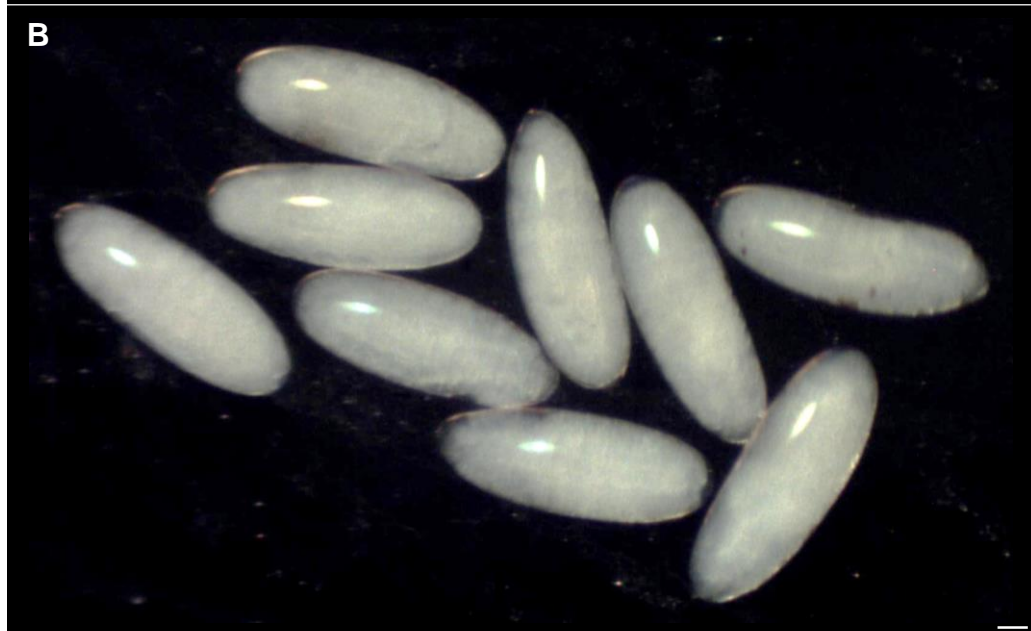

### **Supplementary Table S1**

Gene name, oligonucleotide-primer sequence (F: forward; R: reverse), molecular size (bp) and annealing temperature (Ta) of the amplified PCR products for the, herein, examined genes.



| Gene Name                                                      | Primer Sequence                      | Molecular Size (bp) of PCR Product | Ta   |
|----------------------------------------------------------------|--------------------------------------|------------------------------------|------|
| Chorion protein 38<br>Transcript variants A and B<br>(CG11213) | F: 5'-CGA GAT CGA CCT ACA TTT G-3'   | 213                                | 53°C |
|                                                                | R: 5'-ATT CGA GAG CAC CAG CAC C-3'   |                                    |      |
| Chorion protein 38<br>Transcript variant B<br>(CG11213)        | F: 5'-TTA CGG ATT GGA TGA CTG CTG-3' | 228                                | 54°C |
|                                                                | R: 5'-GCA AAG AAA CCT GAG TGC CAC-3' |                                    |      |

**Supplementary Table S2**

Protein library (n=2,123 members) of s38-downregulated (c355>s38\_RNAi) *D. melanogaster* ovaries, specifying, for each identified protein, the following parameters: (A) UniProt accession number, (B) name and description, (C) Mascot score and (D) sequence coverage. Additional important features of the nLC-MS/MS proteomics analysis, such as the number of unique peptides, the number of amino-acid residues, the molecular weight (kDa) and the isoelectric point, are also described.

| Accession | Description                                                                                                               | Score  | Coverage | # Proteins | # Unique Peptides | # Peptides | # PSMs | Area     | # AAs | MW [kDa] | calc. pI |
|-----------|---------------------------------------------------------------------------------------------------------------------------|--------|----------|------------|-------------------|------------|--------|----------|-------|----------|----------|
| P02844    | Vitellogenin-2 OS=Drosophila melanogaster GN=Yp2 PE=1 SV=2 - [VIT2_DROME]                                                 | 579.43 | 52.04    | 2          | 22                | 23         | 329    | 1.523E10 | 442   | 49.6     | 7.96     |
| P02828    | Heat shock protein 83 OS=Drosophila melanogaster GN=Hsp83 PE=1 SV=1 - [HSP83_DROME]                                       | 563.00 | 51.46    | 3          | 40                | 43         | 269    | 2.667E9  | 717   | 81.8     | 5.02     |
| P11147    | Heat shock 70 kDa protein cognate 4 OS=Drosophila melanogaster GN=Hsc70-4 PE=1 SV=3 - [HSP7D_DROME]                       | 473.94 | 60.06    | 6          | 32                | 41         | 218    | 3.569E9  | 651   | 71.1     | 5.52     |
| P02843    | Vitellogenin-1 OS=Drosophila melanogaster GN=Yp1 PE=1 SV=1 - [VIT1_DROME]                                                 | 471.47 | 63.10    | 1          | 23                | 24         | 316    | 1.734E10 | 439   | 48.7     | 7.69     |
| M9NFS1    | Terribly reduced optic lobes, isoform AQ OS=Drosophila melanogaster GN=trol PE=4 SV=2 - [M9NFS1_DROME]                    | 315.49 | 22.77    | 18         | 5                 | 70         | 163    | 2.703E8  | 4299  | 476.3    | 4.88     |
| M9NGK3    | Terribly reduced optic lobes, isoform AL OS=Drosophila melanogaster GN=trol PE=4 SV=2 - [M9NGK3_DROME]                    | 315.32 | 24.81    | 4          | 1                 | 66         | 160    | 2.703E8  | 3728  | 412.5    | 4.92     |
| P18169    | Defective chorion-1 protein, FC125 isoform OS=Drosophila melanogaster GN=dec-1 PE=2 SV=2 - [DEC11_DROME]                  | 314.34 | 44.29    | 6          | 34                | 34         | 113    | 1.086E9  | 1208  | 137.4    | 5.29     |
| E1JHJ3    | Myosin heavy chain, isoform O OS=Drosophila melanogaster GN=Mhc PE=4 SV=1 - [E1JHJ3_DROME]                                | 277.96 | 34.91    | 5          | 3                 | 68         | 127    | 3.583E8  | 1962  | 224.4    | 6.19     |
| M9ND95    | Myosin heavy chain, isoform U OS=Drosophila melanogaster GN=Mhc PE=4 SV=1 - [M9ND95_DROME]                                | 269.67 | 34.22    | 4          | 2                 | 67         | 125    | 3.583E8  | 1949  | 222.8    | 6.25     |
| P10987    | Actin-5C OS=Drosophila melanogaster GN=Act5C PE=1 SV=4 - [ACT1_DROME]                                                     | 240.17 | 60.64    | 1          | 1                 | 20         | 164    | 6.286E9  | 376   | 41.8     | 5.48     |
| P02572    | Actin-42A OS=Drosophila melanogaster GN=Act42A PE=1 SV=3 - [ACT2_DROME]                                                   | 238.63 | 52.39    | 1          | 1                 | 17         | 161    | 6.286E9  | 376   | 41.8     | 5.48     |
| M9PF14    | Trailer hitch, isoform C OS=Drosophila melanogaster GN=tral PE=4 SV=1 - [M9PF14_DROME]                                    | 233.98 | 49.85    | 2          | 0                 | 22         | 84     | 1.403E9  | 656   | 69.7     | 9.48     |
| Q05825    | ATP synthase subunit beta, mitochondrial OS=Drosophila melanogaster GN=ATPSyn-beta PE=2 SV=3 - [ATPB_DROME]               | 233.47 | 40.59    | 3          | 16                | 16         | 99     | 1.533E9  | 505   | 54.1     | 5.27     |
| P29844    | Heat shock 70 kDa protein cognate 3 OS=Drosophila melanogaster GN=Hsc70-3 PE=2 SV=2 - [HSP7C_DROME]                       | 231.65 | 47.41    | 2          | 26                | 31         | 110    | 3.040E9  | 656   | 72.2     | 5.36     |
| Q9V7Z0    | GH08269p OS=Drosophila melanogaster GN=tral PE=1 SV=3 - [Q9V7Z0_DROME]                                                    | 230.64 | 49.54    | 2          | 1                 | 22         | 84     | 1.403E9  | 652   | 69.3     | 9.54     |
| M9PFF9    | Trailer hitch, isoform D OS=Drosophila melanogaster GN=tral PE=4 SV=1 - [M9PFF9_DROME]                                    | 209.85 | 48.76    | 2          | 1                 | 18         | 73     | 1.403E9  | 646   | 68.7     | 9.54     |
| P07182    | Chorion protein S36 OS=Drosophila melanogaster GN=Cp36 PE=3 SV=2 - [CH36_DROME]                                           | 207.98 | 33.45    | 1          | 9                 | 9          | 75     | 1.329E9  | 284   | 29.9     | 8.69     |
| P06607    | Vitellogenin-3 OS=Drosophila melanogaster GN=Yp3 PE=1 SV=1 - [VIT3_DROME]                                                 | 203.85 | 60.95    | 1          | 23                | 23         | 178    | 1.064E10 | 420   | 46.1     | 8.50     |
| E1JGP0    | Actin 57B, isoform C OS=Drosophila melanogaster GN=Act57B PE=2 SV=1 - [E1JGP0_DROME]                                      | 199.54 | 58.33    | 2          | 1                 | 18         | 127    | 6.286E9  | 360   | 40.2     | 5.83     |
| P10981    | Actin-87E OS=Drosophila melanogaster GN=Act87E PE=1 SV=1 - [ACT5_DROME]                                                   | 196.17 | 55.85    | 3          | 1                 | 18         | 126    | 6.286E9  | 376   | 41.8     | 5.48     |
| P13060    | Elongation factor 2 OS=Drosophila melanogaster GN=EF2 PE=1 SV=4 - [EF2_DROME]                                             | 195.05 | 47.04    | 1          | 33                | 33         | 117    | 3.173E9  | 844   | 94.4     | 6.60     |
| P05389    | 60S acidic ribosomal protein P2 OS=Drosophila melanogaster GN=RpLP2 PE=1 SV=1 - [RLA2_DROME]                              | 188.97 | 53.98    | 1          | 8                 | 8          | 87     | 9.276E8  | 113   | 11.7     | 4.70     |
| P08736    | Elongation factor 1-alpha 1 OS=Drosophila melanogaster GN=Ef1alpha48D PE=1 SV=2 - [EF1A1_DROME]                           | 185.42 | 53.13    | 2          | 22                | 22         | 121    | 1.434E10 | 463   | 50.3     | 9.07     |
| Q7KN62    | Transitional endoplasmic reticulum ATPase TER94 OS=Drosophila melanogaster GN=TER94 PE=1 SV=1 - [TERA_DROME]              | 182.86 | 47.82    | 2          | 34                | 34         | 90     | 4.569E8  | 801   | 88.8     | 5.35     |
| O18640    | Guanine nucleotide-binding protein subunit beta-like protein OS=Drosophila melanogaster GN=Rack1 PE=1 SV=2 - [GBLP_DROME] | 182.62 | 63.21    | 2          | 19                | 20         | 106    | 1.892E9  | 318   | 35.6     | 7.47     |
| P09180    | 60S ribosomal protein L4 OS=Drosophila melanogaster GN=RpL4 PE=1 SV=2 - [RL4_DROME]                                       | 170.23 | 47.13    | 2          | 19                | 19         | 68     | 1.571E9  | 401   | 45.0     | 11.47    |
| O02649    | 60 kDa heat shock protein, mitochondrial OS=Drosophila melanogaster GN=Hsp60 PE=1 SV=3 - [CH60_DROME]                     | 167.65 | 58.12    | 2          | 30                | 30         | 75     | 6.141E8  | 573   | 60.8     | 5.49     |
| P19889    | 60S acidic ribosomal protein P0 OS=Drosophila melanogaster GN=RpLP0 PE=1 SV=1 - [RLA0_DROME]                              | 161.75 | 56.78    | 1          | 18                | 18         | 74     | 2.164E9  | 317   | 34.2     | 6.95     |
| Q24560    | Tubulin beta-1 chain OS=Drosophila melanogaster GN=betaTub56D PE=1 SV=2 - [TBB1_DROME]                                    | 161.36 | 39.60    | 5          | 10                | 15         | 79     | 1.711E9  | 447   | 50.1     | 4.86     |
| Q9VMA3    | Protein cup OS=Drosophila melanogaster GN=cup PE=1 SV=3 - [CUP_DROME]                                                     | 158.73 | 40.91    | 1          | 25                | 25         | 71     | 2.825E8  | 1117  | 125.6    | 8.85     |
| P54399    | Protein disulfide-isomerase OS=Drosophila melanogaster GN=Pdi PE=2 SV=1 - [PDI_DROME]                                     | 154.01 | 55.44    | 1          | 22                | 22         | 103    | 6.349E8  | 496   | 55.7     | 4.82     |
| P07186    | Chorion protein S19 OS=Drosophila melanogaster GN=Cp19 PE=2 SV=1 - [CH19_DROME]                                           | 153.87 | 67.63    | 1          | 7                 | 7          | 60     | 1.047E9  | 173   | 18.5     | 9.36     |
| Q06559    | 40S ribosomal protein S3 OS=Drosophila melanogaster GN=RpS3 PE=1 SV=1 - [RS3_DROME]                                       | 146.34 | 71.54    | 1          | 21                | 21         | 97     | 1.915E9  | 246   | 27.5     | 9.39     |
| Q9W057    | LD20211p OS=Drosophila melanogaster GN=Tudor-SN PE=1 SV=1 - [Q9W057_DROME]                                                | 146.14 | 33.80    | 1          | 28                | 28         | 71     | 3.364E8  | 926   | 103.0    | 8.05     |
| P35381    | ATP synthase subunit alpha, mitochondrial OS=Drosophila melanogaster GN=blw PE=1 SV=2 - [ATPA_DROME]                      | 144.14 | 46.74    | 3          | 30                | 30         | 76     | 1.177E9  | 552   | 59.4     | 9.01     |
| P14130    | 40S ribosomal protein S14 OS=Drosophila melanogaster GN=RpS14a PE=1 SV=1 - [RS14_DROME]                                   | 140.13 | 48.34    | 1          | 9                 | 9          | 50     | 2.630E9  | 151   | 16.3     | 10.35    |
| O62619    | Pyruvate kinase OS=Drosophila melanogaster GN=PyK PE=2 SV=2 - [KPYK_DROME]                                                | 139.63 | 47.65    | 1          | 21                | 21         | 75     | 3.277E8  | 533   | 57.4     | 7.44     |
| P21187    | Polyadenylate-binding protein OS=Drosophila melanogaster GN=pAbp PE=1 SV=3 - [PABP_DROME]                                 | 139.13 | 43.38    | 1          | 19                | 19         | 62     | 1.006E9  | 634   | 69.9     | 9.31     |
| Q9VIE8    | Aconitase, isoform B OS=Drosophila melanogaster GN=Acon PE=2 SV=2 - [Q9VIE8_DROME]                                        | 138.54 | 41.68    | 2          | 24                | 24         | 71     | 2.296E8  | 787   | 85.3     | 8.24     |
| Q9VUC1    | CG6603-PA, isoform A OS=Drosophila melanogaster GN=Hsc70Cb PE=2 SV=1 - [Q9VUC1_DROME]                                     | 131.19 | 44.15    | 2          | 26                | 26         | 63     | 3.379E8  | 804   | 88.4     | 5.43     |
| Q7K3J0    | CG8258 OS=Drosophila melanogaster GN=CG8258 PE=2 SV=1 - [Q7K3J0_DROME]                                                    | 128.11 | 47.44    | 1          | 22                | 22         | 67     | 3.894E8  | 546   | 59.4     | 5.31     |
| Q86829    | Papilin OS=Drosophila melanogaster GN=Ppn PE=1 SV=2 - [PPN_DROME]                                                         | 127.49 | 16.32    | 1          | 31                | 31         | 70     | 2.530E8  | 2898  | 312.8    | 4.58     |
| Q9W392    | CG7033 OS=Drosophila melanogaster GN=CG7033 PE=2 SV=2 - [Q9W392_DROME]                                                    | 127.30 | 50.65    | 2          | 21                | 21         | 55     | 6.323E8  | 535   | 58.0     | 5.85     |
| Q9VQL7    | CG3523, isoform A OS=Drosophila melanogaster GN=CG3523 PE=4 SV=1 - [Q9VQL7_DROME]                                         | 123.09 | 18.50    | 2          | 33                | 33         | 63     | 1.466E8  | 2438  | 266.3    | 6.37     |
| Q9V496    | Apolipoporphin OS=Drosophila melanogaster GN=Rfabg PE=1 SV=2 - [APLP_DROME]                                               | 122.86 | 17.22    | 1          | 50                | 50         | 76     | 1.827E8  | 3351  | 372.4    | 7.97     |
| Q9VHP0    | ATP-dependent RNA helicase bel OS=Drosophila melanogaster GN=bel PE=1 SV=1 - [DDX3_DROME]                                 | 122.53 | 40.23    | 2          | 22                | 24         | 62     | 1.804E8  | 798   | 85.0     | 7.53     |
| P15357    | Ubiquitin-40S ribosomal protein S27a OS=Drosophila melanogaster GN=RpS27A PE=1 SV=2 - [RS27A_DROME]                       | 122.13 | 60.26    | 4          | 3                 | 9          | 57     | 2.693E9  | 156   | 17.9     | 9.77     |
| P46223    | 60S ribosomal protein L7a OS=Drosophila melanogaster GN=RpL7A PE=1 SV=2 - [RL7A_DROME]                                    | 121.32 | 37.27    | 1          | 16                | 16         | 52     | 2.749E9  | 271   | 30.7     | 10.71    |
| Q81PM3    | Growl, isoform B (Fragment) OS=Drosophila melanogaster GN=lost PE=4 SV=2 - [Q81PM3_DROME]                                 | 118.83 | 43.93    | 2          | 22                | 22         | 53     | 4.917E8  | 535   | 58.9     | 9.32     |
| Q7KSU6    | CG8036, isoform D OS=Drosophila melanogaster GN=CG8036 PE=4 SV=1 - [Q7KSU6_DROME]                                         | 118.61 | 33.79    | 3          | 20                | 20         | 51     | 6.747E8  | 580   | 63.0     | 6.80     |

| Accession | Description                                                                                                           | Score  | Coverage | # Proteins | # Unique Peptides | # Peptides | # PSMs | Area    | # AAs | MW [kDa] | calc. pI |
|-----------|-----------------------------------------------------------------------------------------------------------------------|--------|----------|------------|-------------------|------------|--------|---------|-------|----------|----------|
| P92177    | 14-3-3 protein epsilon OS=Drosophila melanogaster GN=14-3-3epsilon PE=1 SV=2 - [1433E_DROME]                          | 118.54 | 60.69    | 1          | 17                | 19         | 62     | 1.049E9 | 262   | 29.8     | 4.78     |
| Q9VHL2    | LD47396p OS=Drosophila melanogaster GN=Tcp-1eta PE=2 SV=2 - [Q9VHL2_DROME]                                            | 118.39 | 49.45    | 1          | 24                | 24         | 70     | 5.049E8 | 544   | 59.3     | 6.34     |
| Q7KM15    | Beta NAC homolog OS=Drosophila melanogaster GN=bic PE=2 SV=1 - [Q7KM15_DROME]                                         | 115.15 | 81.07    | 2          | 15                | 15         | 43     | 9.985E8 | 169   | 17.7     | 7.49     |
| Q9VFT4    | AT27578p OS=Drosophila melanogaster GN=rin PE=1 SV=1 - [Q9VFT4_DROME]                                                 | 114.98 | 29.71    | 1          | 16                | 16         | 47     | 4.305E8 | 690   | 74.9     | 7.37     |
| Q9V3P0    | Peroxiredoxin 1 OS=Drosophila melanogaster GN=Jafra1 PE=1 SV=1 - [PRDX1_DROME]                                        | 113.94 | 45.36    | 1          | 10                | 10         | 54     | 6.034E8 | 194   | 21.7     | 5.71     |
| Q8T0L3    | GH24511p OS=Drosophila melanogaster GN=Uba1 PE=2 SV=1 - [Q8T0L3_DROME]                                                | 113.81 | 29.55    | 1          | 25                | 25         | 61     | 2.122E8 | 1191  | 130.7    | 5.29     |
| O61380    | Eukaryotic translation initiation factor 4G, isoform A OS=Drosophila melanogaster GN=eIF4G PE=2 SV=3 - [O61380_DROME] | 112.18 | 28.99    | 2          | 31                | 31         | 63     | 1.722E8 | 1666  | 183.8    | 7.83     |
| Q9NJH0    | Elongation factor 1-gamma OS=Drosophila melanogaster GN=Ef1gamma PE=2 SV=2 - [EF1G_DROME]                             | 112.11 | 34.57    | 1          | 15                | 15         | 50     | 1.554E9 | 431   | 48.9     | 7.05     |
| P07487    | Glyceraldehyde-3-phosphate dehydrogenase 2 OS=Drosophila melanogaster GN=Gapdh2 PE=1 SV=2 - [G3P2_DROME]              | 111.78 | 51.51    | 2          | 4                 | 14         | 56     | 2.189E9 | 332   | 35.3     | 8.44     |
| P06603    | Tubulin alpha-1 chain OS=Drosophila melanogaster GN=alphaTub84B PE=2 SV=1 - [TBA1_DROME]                              | 111.54 | 33.11    | 3          | 11                | 11         | 61     | 7.185E8 | 450   | 49.9     | 5.14     |
| P98163    | Putative vitellogenin receptor OS=Drosophila melanogaster GN=y1 PE=1 SV=2 - [YL_DROME]                                | 110.69 | 17.24    | 1          | 22                | 22         | 54     | 1.734E8 | 1984  | 219.4    | 6.20     |
| Q02748    | Eukaryotic initiation factor 4A OS=Drosophila melanogaster GN=eIF-4a PE=1 SV=3 - [IF4A_DROME]                         | 109.59 | 42.43    | 1          | 17                | 19         | 61     | 1.216E9 | 403   | 45.8     | 5.66     |
| P48605    | T-complex protein 1 subunit gamma OS=Drosophila melanogaster GN=Cctgamma PE=2 SV=2 - [TCGP_DROME]                     | 109.07 | 49.08    | 2          | 25                | 25         | 59     | 4.988E8 | 544   | 59.4     | 6.80     |
| Q8MLY8    | 40S ribosomal protein S8 OS=Drosophila melanogaster GN=RpS8 PE=1 SV=1 - [RS8_DROME]                                   | 108.71 | 49.04    | 1          | 11                | 11         | 45     | 1.846E9 | 208   | 23.7     | 10.48    |
| O16797    | 60S ribosomal protein L3 OS=Drosophila melanogaster GN=RpL3 PE=1 SV=3 - [RL3_DROME]                                   | 106.89 | 50.00    | 1          | 22                | 22         | 61     | 1.583E9 | 416   | 46.9     | 10.24    |
| Q9V534    | 60S ribosomal protein L18 OS=Drosophila melanogaster GN=RpL18 PE=1 SV=1 - [RL18_DROME]                                | 103.79 | 34.57    | 1          | 5                 | 5          | 49     | 8.581E8 | 188   | 21.7     | 11.53    |
| P31009    | 40S ribosomal protein S2 OS=Drosophila melanogaster GN=RpS2 PE=1 SV=2 - [RS2_DROME]                                   | 103.29 | 47.19    | 1          | 13                | 13         | 52     | 1.898E9 | 267   | 28.9     | 10.15    |
| P23128    | Putative ATP-dependent RNA helicase me31b OS=Drosophila melanogaster GN=me31B PE=1 SV=3 - [DDX6_DROME]                | 102.45 | 41.61    | 1          | 17                | 17         | 55     | 9.704E8 | 459   | 51.9     | 7.64     |
| E1JHR5    | Enolase, isoform F OS=Drosophila melanogaster GN=Eno PE=3 SV=1 - [E1JHR5_DROME]                                       | 102.12 | 52.42    | 2          | 21                | 21         | 56     | 1.146E9 | 433   | 46.6     | 6.55     |
| P07486    | Glyceraldehyde-3-phosphate dehydrogenase 1 OS=Drosophila melanogaster GN=Gapdh1 PE=2 SV=2 - [G3P1_DROME]              | 100.30 | 51.20    | 2          | 3                 | 13         | 53     | 1.947E9 | 332   | 35.3     | 8.18     |
| Q9VEB1    | CG7998 OS=Drosophila melanogaster GN=Mdh2 PE=2 SV=1 - [Q9VEB1_DROME]                                                  | 100.15 | 33.93    | 1          | 12                | 12         | 40     | 5.276E8 | 336   | 35.3     | 9.11     |
| X2JC80    | 40S ribosomal protein SA OS=Drosophila melanogaster GN=sta PE=3 SV=1 - [X2JC80_DROME]                                 | 99.99  | 39.63    | 2          | 9                 | 9          | 45     | 1.460E9 | 270   | 30.2     | 4.87     |
| P02517    | Heat shock protein 26 OS=Drosophila melanogaster GN=Hsp26 PE=1 SV=2 - [HSP26_DROME]                                   | 98.32  | 62.02    | 1          | 9                 | 9          | 52     | 7.528E8 | 208   | 23.0     | 7.56     |
| Q9VEG6    | Chorion peroxidase OS=Drosophila melanogaster GN=Pxt PE=2 SV=3 - [PERC_DROME]                                         | 98.11  | 35.60    | 1          | 19                | 19         | 44     | 2.585E8 | 809   | 90.5     | 6.90     |
| Q9VN25    | Eukaryotic translation initiation factor 3 subunit A OS=Drosophila melanogaster GN=eIF3-S10 PE=1 SV=1 - [EIF3A_DROME] | 98.03  | 22.37    | 1          | 26                | 26         | 43     | 2.052E8 | 1140  | 133.8    | 9.01     |
| P00334    | Alcohol dehydrogenase OS=Drosophila melanogaster GN=Adh PE=1 SV=2 - [ADH_DROME]                                       | 96.86  | 51.95    | 1          | 9                 | 9          | 50     | 6.400E8 | 256   | 27.7     | 7.96     |
| Q24251    | ATP synthase subunit d, mitochondrial OS=Drosophila melanogaster GN=ATPsyn-d PE=2 SV=2 - [ATP5H_DROME]                | 95.37  | 56.74    | 1          | 11                | 11         | 40     | 3.785E8 | 178   | 20.2     | 6.55     |
| P18101    | Ubiquitin-60S ribosomal protein L40 OS=Drosophila melanogaster GN=RpL40 PE=1 SV=2 - [RL40_DROME]                      | 93.97  | 49.22    | 4          | 1                 | 7          | 48     | 2.693E9 | 128   | 14.7     | 9.83     |
| Q960D3    | SD06613p OS=Drosophila melanogaster GN=vig2 PE=2 SV=1 - [Q960D3_DROME]                                                | 91.80  | 49.51    | 2          | 18                | 18         | 38     | 3.932E8 | 412   | 45.2     | 9.41     |
| P48159    | 60S ribosomal protein L23 OS=Drosophila melanogaster GN=RpL23 PE=1 SV=2 - [RL23_DROME]                                | 91.80  | 50.00    | 1          | 7                 | 7          | 33     | 8.824E8 | 140   | 14.9     | 10.83    |
| O96827    | Probable elongation factor 1-beta OS=Drosophila melanogaster GN=Ef1beta PE=1 SV=3 - [EF1B_DROME]                      | 90.28  | 66.22    | 1          | 10                | 10         | 43     | 1.372E9 | 222   | 24.2     | 4.58     |
| Q9VFF0    | CG3731, isoform A OS=Drosophila melanogaster GN=CG3731 PE=2 SV=2 - [Q9VFF0_DROME]                                     | 90.25  | 37.66    | 1          | 12                | 12         | 36     | 2.755E8 | 470   | 51.8     | 6.00     |
| Q7KKI0    | GM12270p OS=Drosophila melanogaster GN=Cct5 PE=2 SV=1 - [Q7KKI0_DROME]                                                | 89.56  | 40.22    | 2          | 18                | 19         | 53     | 2.366E8 | 542   | 59.2     | 6.25     |
| X2JB48    | Stress-sensitive B, isoform E OS=Drosophila melanogaster GN=sesB PE=3 SV=1 - [X2JB48_DROME]                           | 88.76  | 54.18    | 3          | 19                | 19         | 79     | 1.483E9 | 299   | 32.9     | 9.77     |
| Q9VFN5    | CG2720-PA OS=Drosophila melanogaster GN=Hop PE=2 SV=1 - [Q9VFN5_DROME]                                                | 88.33  | 38.57    | 1          | 17                | 17         | 47     | 2.412E8 | 490   | 55.7     | 6.81     |
| Q00174    | Laminin subunit alpha OS=Drosophila melanogaster GN=Lana PE=1 SV=2 - [LAMA_DROME]                                     | 87.11  | 12.96    | 1          | 31                | 31         | 49     | 8.606E7 | 3712  | 410.9    | 5.22     |
| P55935    | 40S ribosomal protein S9 OS=Drosophila melanogaster GN=RpS9 PE=1 SV=2 - [RS9_DROME]                                   | 86.54  | 46.67    | 2          | 14                | 14         | 50     | 9.425E8 | 195   | 22.6     | 10.61    |
| O16043    | Anon1A4 OS=Drosophila melanogaster GN=Df31 PE=2 SV=1 - [O16043_DROME]                                                 | 86.31  | 85.79    | 1          | 15                | 15         | 39     | 7.204E8 | 183   | 18.8     | 4.27     |
| P25007    | Peptidyl-prolyl cis-trans isomerase OS=Drosophila melanogaster GN=Cyp1 PE=1 SV=2 - [PPIA_DROME]                       | 86.06  | 59.03    | 8          | 13                | 13         | 46     | 2.524E9 | 227   | 24.7     | 9.22     |
| Q9V3P6    | 26S proteasome non-ATPase regulatory subunit 1 OS=Drosophila melanogaster GN=Rpn2 PE=1 SV=1 - [PSMD1_DROME]           | 86.04  | 22.94    | 1          | 17                | 17         | 40     | 3.105E8 | 1020  | 113.1    | 5.19     |
| P55830    | 40S ribosomal protein S3a OS=Drosophila melanogaster GN=RpS3A PE=1 SV=4 - [RS3A_DROME]                                | 85.74  | 58.58    | 1          | 17                | 17         | 74     | 2.122E9 | 268   | 30.3     | 9.61     |
| Q9W1B9    | RE28824p OS=Drosophila melanogaster GN=RpL12 PE=1 SV=1 - [Q9W1B9_DROME]                                               | 85.62  | 46.06    | 1          | 9                 | 9          | 41     | 2.356E9 | 165   | 17.7     | 9.07     |
| P08570    | 60S acidic ribosomal protein P1 OS=Drosophila melanogaster GN=RpL1 PE=1 SV=2 - [RLA1_DROME]                           | 85.02  | 73.21    | 1          | 6                 | 6          | 43     | 2.469E9 | 112   | 11.5     | 4.41     |
| Q9VWG3    | 40S ribosomal protein S10b OS=Drosophila melanogaster GN=RpS10b PE=1 SV=2 - [RS10B_DROME]                             | 84.74  | 48.13    | 2          | 8                 | 8          | 36     | 7.661E8 | 160   | 17.9     | 9.80     |
| P50887    | 60S ribosomal protein L22 OS=Drosophila melanogaster GN=RpL22 PE=1 SV=2 - [RL22_DROME]                                | 84.08  | 50.17    | 1          | 13                | 13         | 28     | 1.915E9 | 299   | 30.6     | 10.11    |
| P84040    | Histone H4 OS=Drosophila melanogaster GN=His4 PE=1 SV=2 - [H4_DROME]                                                  | 82.10  | 52.43    | 1          | 7                 | 7          | 40     | 2.261E9 | 103   | 11.4     | 11.36    |
| P41126    | 60S ribosomal protein L13 OS=Drosophila melanogaster GN=RpL13 PE=1 SV=1 - [RL13_DROME]                                | 81.43  | 43.58    | 1          | 13                | 13         | 46     | 1.199E9 | 218   | 24.9     | 10.99    |
| P07764    | Fructose-bisphosphate aldolase OS=Drosophila melanogaster GN=Ald PE=1 SV=5 - [ALF_DROME]                              | 80.92  | 50.42    | 2          | 16                | 16         | 46     | 3.827E8 | 361   | 39.0     | 7.40     |
| Q9W237    | 40S ribosomal protein S16 OS=Drosophila melanogaster GN=RpS16 PE=1 SV=1 - [RS16_DROME]                                | 80.53  | 55.41    | 1          | 10                | 10         | 41     | 1.014E9 | 148   | 16.8     | 10.17    |
| P24156    | Protein I(2)37Cc OS=Drosophila melanogaster GN=I(2)37Cc PE=2 SV=2 - [L2CC_DROME]                                      | 80.45  | 50.36    | 1          | 11                | 11         | 40     | 2.237E8 | 276   | 30.4     | 5.73     |

| Accession | Description                                                                                                          | Score | Coverage | # Proteins | # Unique Peptides | # Peptides | # PSMs | Area    | # AAs | MW [kDa] | calc. pI |
|-----------|----------------------------------------------------------------------------------------------------------------------|-------|----------|------------|-------------------|------------|--------|---------|-------|----------|----------|
| P13469    | DNA-binding protein modulo OS=Drosophila melanogaster GN=mod PE=1 SV=2 - [MODU_DROME]                                | 79.99 | 39.30    | 1          | 21                | 21         | 45     | 5.979E8 | 542   | 60.3     | 5.43     |
| P36241    | 60S ribosomal protein L19 OS=Drosophila melanogaster GN=Rpl19 PE=1 SV=2 - [RL19_DROME]                               | 79.44 | 35.47    | 1          | 9                 | 9          | 31     | 8.729E8 | 203   | 24.0     | 11.00    |
| P09052    | ATP-dependent RNA helicase vasa, isoform A OS=Drosophila melanogaster GN=vas PE=1 SV=3 - [VASA1_DROME]               | 79.24 | 25.57    | 2          | 12                | 13         | 33     | 2.134E8 | 661   | 72.3     | 5.66     |
| Q9VTP4    | 60S ribosomal protein L10a-2 OS=Drosophila melanogaster GN=Rpl10Ab PE=1 SV=2 - [R10AB_DROME]                         | 78.92 | 43.32    | 1          | 11                | 11         | 54     | 1.924E9 | 217   | 24.3     | 9.86     |
| P07185    | Chorion protein S15 OS=Drosophila melanogaster GN=Cp15 PE=3 SV=1 - [CH15_DROME]                                      | 78.71 | 67.83    | 1          | 5                 | 5          | 29     | 4.166E8 | 115   | 12.0     | 8.92     |
| M9PI17    | CG6084, isoform D OS=Drosophila melanogaster GN=CG6084 PE=4 SV=1 - [M9PI17_DROME]                                    | 78.08 | 40.51    | 5          | 11                | 11         | 42     | 4.817E8 | 316   | 35.9     | 6.80     |
| P32100    | 60S ribosomal protein L7 OS=Drosophila melanogaster GN=Rpl7 PE=1 SV=2 - [RL7_DROME]                                  | 77.50 | 39.68    | 1          | 14                | 14         | 42     | 1.640E9 | 252   | 29.5     | 10.89    |
| Q9VVF9    | DnaJ-like-2, isoform A OS=Drosophila melanogaster GN=Droj2 PE=2 SV=1 - [Q9VVF9_DROME]                                | 77.38 | 41.69    | 1          | 14                | 14         | 34     | 1.637E8 | 403   | 45.2     | 6.48     |
| Q9VV75    | AT02348p OS=Drosophila melanogaster GN=CG4169 PE=2 SV=1 - [Q9VV75_DROME]                                             | 76.79 | 44.55    | 1          | 12                | 12         | 28     | 2.747E8 | 440   | 45.4     | 9.44     |
| Q9W1G7    | LD21576p OS=Drosophila melanogaster GN=Nap1 PE=2 SV=1 - [Q9W1G7_DROME]                                               | 76.36 | 29.19    | 1          | 11                | 11         | 37     | 8.630E8 | 370   | 42.7     | 4.79     |
| Q81P94    | CG5353-PB, isoform B OS=Drosophila melanogaster GN=Aats-thr PE=3 SV=1 - [Q81P94_DROME]                               | 75.92 | 22.32    | 2          | 12                | 12         | 40     | 1.005E8 | 690   | 79.3     | 6.90     |
| Q7KN75    | Dodeca-satellite-binding protein 1, isoform A OS=Drosophila melanogaster GN=Dp1 PE=2 SV=1 - [Q7KN75_DROME]           | 74.95 | 24.75    | 1          | 23                | 23         | 40     | 1.724E8 | 1301  | 144.2    | 6.20     |
| P15215    | Laminin subunit gamma-1 OS=Drosophila melanogaster GN=LanB2 PE=2 SV=2 - [LAMC1_DROME]                                | 73.86 | 26.78    | 1          | 29                | 29         | 44     | 2.402E8 | 1639  | 182.2    | 5.38     |
| Q9VN44    | FI07923p OS=Drosophila melanogaster GN=Karybeta3 PE=2 SV=1 - [Q9VN44_DROME]                                          | 73.04 | 21.18    | 1          | 17                | 17         | 45     | 3.307E8 | 1105  | 123.5    | 4.73     |
| P29845    | Heat shock 70 kDa protein cognate 5 OS=Drosophila melanogaster GN=Hsc70-5 PE=1 SV=2 - [HSP7E_DROME]                  | 72.88 | 38.48    | 1          | 24                | 25         | 39     | 2.807E8 | 686   | 74.0     | 6.35     |
| Q59E58    | Zipper, isoform C OS=Drosophila melanogaster GN=zip PE=4 SV=1 - [Q59E58_DROME]                                       | 72.73 | 15.27    | 2          | 1                 | 24         | 41     | 1.044E8 | 1971  | 226.8    | 5.47     |
| Q9GU68    | Eukaryotic translation initiation factor 5A OS=Drosophila melanogaster GN=eIF-5A PE=2 SV=2 - [IF5A_DROME]            | 72.37 | 51.57    | 1          | 12                | 12         | 47     | 1.990E9 | 159   | 17.6     | 5.15     |
| P08879    | Nucleoside diphosphate kinase OS=Drosophila melanogaster GN=awd PE=1 SV=3 - [NDKA_DROME]                             | 71.70 | 44.44    | 1          | 6                 | 6          | 32     | 1.403E9 | 153   | 17.2     | 8.12     |
| Q9VHR8    | Dipeptidyl peptidase 3 OS=Drosophila melanogaster GN=DppIII PE=2 SV=2 - [DPP3_DROME]                                 | 70.92 | 33.08    | 1          | 22                | 22         | 47     | 3.114E8 | 786   | 89.1     | 6.43     |
| Q9VBU7    | Nup358 OS=Drosophila melanogaster GN=Nup358 PE=4 SV=2 - [Q9VBU7_DROME]                                               | 70.27 | 15.36    | 1          | 26                | 26         | 34     | 1.776E8 | 2695  | 296.2    | 6.09     |
| Q99323    | Myosin heavy chain, non-muscle OS=Drosophila melanogaster GN=zip PE=1 SV=2 - [MYSN_DROME]                            | 70.26 | 14.44    | 1          | 1                 | 24         | 39     | 1.044E8 | 2057  | 236.5    | 5.68     |
| P29327    | 40S ribosomal protein S6 OS=Drosophila melanogaster GN=RpS6 PE=1 SV=1 - [RS6_DROME]                                  | 70.18 | 34.68    | 2          | 11                | 11         | 36     | 1.291E9 | 248   | 28.4     | 10.74    |
| Q94920    | Voltage-dependent anion-selective channel OS=Drosophila melanogaster GN=porin PE=1 SV=3 - [VDAC_DROME]               | 69.37 | 47.87    | 1          | 12                | 12         | 34     | 1.018E9 | 282   | 30.5     | 6.96     |
| P48149    | 40S ribosomal protein S15Aa OS=Drosophila melanogaster GN=RpS15Aa PE=1 SV=2 - [RS15A_DROME]                          | 69.04 | 45.38    | 2          | 7                 | 7          | 37     | 9.556E8 | 130   | 14.8     | 9.80     |
| Q9VQ61    | Aspartate aminotransferase OS=Drosophila melanogaster GN=Got2 PE=3 SV=1 - [Q9VQ61_DROME]                             | 68.74 | 27.12    | 2          | 10                | 10         | 29     | 3.053E8 | 424   | 47.2     | 8.78     |
| Q9VM69    | CG10206-PA OS=Drosophila melanogaster GN=nop5 PE=2 SV=2 - [Q9VM69_DROME]                                             | 68.18 | 33.86    | 1          | 13                | 13         | 33     | 6.835E7 | 511   | 57.1     | 8.59     |
| Q3YMU0    | Protein disulfide-isomerase (Fragment) OS=Drosophila melanogaster GN=Erp60 PE=2 SV=1 - [Q3YMU0_DROME]                | 67.64 | 34.36    | 1          | 15                | 15         | 39     | 7.557E8 | 489   | 55.3     | 5.87     |
| P12613    | T-complex protein 1 subunit alpha OS=Drosophila melanogaster GN=T-cp1 PE=2 SV=2 - [TCPA_DROME]                       | 67.61 | 31.24    | 1          | 15                | 15         | 41     | 5.611E8 | 557   | 59.5     | 6.39     |
| Q9VMV5    | Viking, isoform A OS=Drosophila melanogaster GN=vkg PE=4 SV=1 - [Q9VMV5_DROME]                                       | 67.43 | 11.29    | 1          | 17                | 17         | 31     | 1.470E8 | 1940  | 193.7    | 6.43     |
| Q01604    | Phosphoglycerate kinase OS=Drosophila melanogaster GN=Pgk PE=2 SV=2 - [PGK_DROME]                                    | 65.99 | 41.93    | 1          | 13                | 13         | 35     | 1.793E8 | 415   | 43.8     | 7.42     |
| Q9VW54    | 26S proteasome regulatory complex subunit p97 OS=Drosophila melanogaster GN=Rpn1 PE=2 SV=2 - [Q9VW54_DROME]          | 65.87 | 19.80    | 1          | 16                | 16         | 34     | 1.891E8 | 919   | 102.2    | 5.85     |
| B7YZQ7    | Nucleosome remodeling factor-38kD, isoform B OS=Drosophila melanogaster GN=Nurf-38 PE=4 SV=1 - [B7YZQ7_DROME]        | 65.70 | 68.62    | 3          | 16                | 16         | 39     | 2.760E8 | 290   | 32.6     | 5.68     |
| Q9VL78    | FK506-binding protein 59 OS=Drosophila melanogaster GN=FKBP59 PE=1 SV=1 - [FKB59_DROME]                              | 65.64 | 43.28    | 1          | 19                | 19         | 39     | 4.250E8 | 439   | 48.8     | 5.41     |
| Q9VWV6    | Transferrin OS=Drosophila melanogaster GN=Tsf1 PE=3 SV=1 - [Q9VWV6_DROME]                                            | 64.18 | 40.56    | 1          | 19                | 19         | 37     | 3.159E8 | 641   | 71.8     | 7.06     |
| Q27415    | Nucleoplasmin-like protein OS=Drosophila melanogaster GN=Nlp PE=1 SV=1 - [NLP_DROME]                                 | 63.96 | 36.18    | 1          | 5                 | 5          | 30     | 7.930E8 | 152   | 17.0     | 4.61     |
| Q81PE8    | CG4389-PB, isoform B OS=Drosophila melanogaster GN=Mtpalpa PE=3 SV=1 - [Q81PE8_DROME]                                | 63.76 | 25.54    | 4          | 15                | 15         | 36     | 2.552E8 | 744   | 79.6     | 8.85     |
| Q9XTL9    | Glycogen phosphorylase OS=Drosophila melanogaster GN=GlyP PE=2 SV=2 - [PYG_DROME]                                    | 63.59 | 22.99    | 1          | 17                | 17         | 36     | 1.137E8 | 844   | 96.9     | 6.52     |
| P41042    | 40S ribosomal protein S4 OS=Drosophila melanogaster GN=RpS4 PE=1 SV=2 - [RS4_DROME]                                  | 63.31 | 51.72    | 1          | 14                | 14         | 56     | 1.531E9 | 261   | 29.1     | 10.18    |
| Q9VLC5    | Aldehyde dehydrogenase OS=Drosophila melanogaster GN=Aldh PE=3 SV=1 - [Q9VLC5_DROME]                                 | 62.75 | 29.81    | 1          | 12                | 12         | 33     | 2.349E8 | 520   | 57.0     | 6.80     |
| P22977    | Chorion protein S16 OS=Drosophila melanogaster GN=Cp16 PE=2 SV=2 - [CH16_DROME]                                      | 62.65 | 44.20    | 1          | 6                 | 6          | 28     | 3.261E8 | 138   | 14.3     | 7.81     |
| P29843    | Heat shock 70 kDa protein cognate 1 OS=Drosophila melanogaster GN=Hsc70-1 PE=1 SV=1 - [HSP7A_DROME]                  | 62.17 | 14.98    | 3          | 1                 | 7          | 30     | 1.626E9 | 641   | 70.6     | 5.49     |
| Q95029    | Cathepsin L OS=Drosophila melanogaster GN=Cp1 PE=2 SV=2 - [CATL_DROME]                                               | 62.10 | 35.85    | 1          | 12                | 12         | 34     | 3.090E8 | 371   | 41.6     | 7.21     |
| Q7JR58    | CG6543, isoform A OS=Drosophila melanogaster GN=CG6543 PE=2 SV=1 - [Q7JR58_DROME]                                    | 61.72 | 41.36    | 1          | 9                 | 9          | 30     | 1.929E8 | 295   | 31.6     | 8.63     |
| A1ZAX1    | Eukaryotic translation initiation factor 3 subunit C OS=Drosophila melanogaster GN=eIF3-S8 PE=1 SV=1 - [EIF3C_DROME] | 61.57 | 21.43    | 1          | 19                | 19         | 40     | 1.324E8 | 910   | 105.6    | 6.06     |
| Q9VAY2    | Glycoprotein 93 OS=Drosophila melanogaster GN=Gp93 PE=2 SV=1 - [Q9VAY2_DROME]                                        | 61.29 | 19.57    | 1          | 11                | 13         | 29     | 1.754E8 | 787   | 90.2     | 5.02     |
| P29310    | 14-3-3 protein zeta OS=Drosophila melanogaster GN=14-3-3zeta PE=1 SV=1 - [1433Z_DROME]                               | 61.08 | 57.66    | 1          | 10                | 12         | 33     | 6.428E8 | 248   | 28.2     | 4.88     |
| O44081    | H/ACA ribonucleoprotein complex subunit 4 OS=Drosophila melanogaster GN=Nop60B PE=1 SV=1 - [DKC1_DROME]              | 60.63 | 30.12    | 1          | 14                | 14         | 29     | 2.994E8 | 508   | 56.8     | 9.28     |
| Q9VAC4    | CG7911 OS=Drosophila melanogaster GN=CG7911 PE=4 SV=1 - [Q9VAC4_DROME]                                               | 60.40 | 49.36    | 1          | 5                 | 5          | 22     | 7.632E8 | 156   | 17.4     | 4.56     |
| P02518    | Heat shock protein 27 OS=Drosophila melanogaster GN=Hsp27 PE=1 SV=2 - [HSP27_DROME]                                  | 60.28 | 46.01    | 1          | 9                 | 9          | 27     | 7.528E8 | 213   | 23.6     | 7.44     |
| P41093    | 60S ribosomal protein L18a OS=Drosophila melanogaster GN=Rpl18A PE=1 SV=1 - [RL18A_DROME]                            | 60.15 | 44.07    | 1          | 11                | 11         | 48     | 2.454E9 | 177   | 21.0     | 10.62    |

| Accession | Description                                                                                                                        | Score | Coverage | # Proteins | # Unique Peptides | # Peptides | # PSMs | Area    | # AAs | MW [kDa] | calc. pI |
|-----------|------------------------------------------------------------------------------------------------------------------------------------|-------|----------|------------|-------------------|------------|--------|---------|-------|----------|----------|
| Q86BM5    | A kinase anchor protein 200, isoform G OS=Drosophila melanogaster GN=Akap200 PE=4 SV=1 - [Q86BM5_DROME]                            | 59.99 | 19.35    | 3          | 13                | 13         | 23     | 2.337E8 | 837   | 88.1     | 4.22     |
| Q9VK60    | CG6180 OS=Drosophila melanogaster GN=CG6180 PE=2 SV=2 - [Q9VK60_DROME]                                                             | 59.41 | 30.35    | 1          | 5                 | 5          | 20     | 3.527E8 | 257   | 28.7     | 8.82     |
| Q9VJ19    | CG10652-PA, isoform A OS=Drosophila melanogaster GN=Rpl30 PE=1 SV=1 - [Q9VJ19_DROME]                                               | 59.10 | 66.67    | 1          | 7                 | 7          | 21     | 8.778E8 | 111   | 12.2     | 9.58     |
| O18404    | 3-hydroxyacyl-CoA dehydrogenase type-2 OS=Drosophila melanogaster GN=scu PE=1 SV=1 - [HCD2_DROME]                                  | 58.84 | 65.10    | 2          | 12                | 12         | 30     | 1.978E8 | 255   | 26.9     | 9.03     |
| A8JNP2    | Arginine kinase, isoform E OS=Drosophila melanogaster GN=Argk PE=3 SV=1 - [A8JNP2_DROME]                                           | 57.86 | 36.53    | 2          | 12                | 12         | 34     | 2.448E8 | 375   | 42.2     | 6.32     |
| Q9W5R8    | 60S ribosomal protein L5 OS=Drosophila melanogaster GN=RpL5 PE=1 SV=2 - [RL5_DROME]                                                | 57.50 | 29.43    | 1          | 10                | 10         | 32     | 2.382E9 | 299   | 34.0     | 9.77     |
| P52295    | Importin subunit alpha OS=Drosophila melanogaster GN=Pen PE=1 SV=2 - [IMA_DROME]                                                   | 57.34 | 34.48    | 1          | 11                | 11         | 24     | 3.548E8 | 522   | 57.8     | 5.35     |
| P11046    | Laminin subunit beta-1 OS=Drosophila melanogaster GN=LanB1 PE=1 SV=4 - [LAMB1_DROME]                                               | 57.15 | 13.03    | 1          | 14                | 14         | 24     | 1.446E8 | 1788  | 198.2    | 5.33     |
| Q9V3U6    | 26-29kD-proteinase OS=Drosophila melanogaster GN=26-29-p PE=2 SV=1 - [Q9V3U6_DROME]                                                | 57.04 | 21.68    | 1          | 11                | 11         | 28     | 8.716E8 | 549   | 62.1     | 6.74     |
| P39018    | 40S ribosomal protein S19a OS=Drosophila melanogaster GN=RpS19a PE=1 SV=3 - [RS19A_DROME]                                          | 56.82 | 62.18    | 1          | 13                | 13         | 31     | 2.165E9 | 156   | 17.3     | 10.11    |
| Q9V6K1    | Tripeptidyl-peptidase 2 OS=Drosophila melanogaster GN=TppII PE=1 SV=2 - [TPP2_DROME]                                               | 56.40 | 17.42    | 1          | 21                | 21         | 37     | 1.790E8 | 1441  | 158.6    | 7.59     |
| Q8MST5    | Beta-Tubulin at 97EF, isoform B OS=Drosophila melanogaster GN=betaTub97EF PE=2 SV=1 - [Q8MST5_DROME]                               | 56.37 | 12.04    | 2          | 1                 | 6          | 27     | 3.933E8 | 457   | 51.2     | 4.86     |
| Q917D3    | Caprin homolog OS=Drosophila melanogaster GN=Capr PE=1 SV=1 - [CAPR1_DROME]                                                        | 56.24 | 24.66    | 1          | 16                | 16         | 29     | 2.425E8 | 961   | 103.5    | 6.51     |
| Q9VVU1    | CG3902-PA OS=Drosophila melanogaster GN=CG3902-RA PE=2 SV=1 - [Q9VVU1_DROME]                                                       | 56.13 | 27.54    | 1          | 9                 | 9          | 30     | 2.052E8 | 414   | 45.3     | 6.71     |
| P08928    | Lamin Dm0 OS=Drosophila melanogaster GN=Lam PE=1 SV=4 - [LAM0_DROME]                                                               | 55.85 | 37.78    | 1          | 16                | 16         | 25     | 9.324E7 | 622   | 71.3     | 6.47     |
| Q9W0A8    | FI01658p OS=Drosophila melanogaster GN=Rpl23A PE=1 SV=1 - [Q9W0A8_DROME]                                                           | 55.39 | 31.05    | 1          | 10                | 10         | 34     | 2.118E9 | 277   | 29.4     | 10.95    |
| P54397    | 39 kDa FK506-binding nuclear protein OS=Drosophila melanogaster GN=FK506-bp1 PE=1 SV=2 - [FKB39_DROME]                             | 54.86 | 26.61    | 1          | 11                | 11         | 35     | 5.196E8 | 357   | 39.3     | 4.79     |
| Q0KHS7    | Lipid storage droplets surface-binding protein OS=Drosophila melanogaster GN=Lsd-2 PE=3 SV=1 - [Q0KHS7_DROME]                      | 53.50 | 50.15    | 2          | 1                 | 13         | 26     | 2.904E8 | 335   | 36.3     | 8.79     |
| P41094    | 40S ribosomal protein S18 OS=Drosophila melanogaster GN=RpS18 PE=1 SV=1 - [RS18_DROME]                                             | 53.40 | 61.84    | 1          | 14                | 14         | 27     | 1.303E9 | 152   | 17.6     | 10.48    |
| Q9VJ86    | Bicoid stability factor OS=Drosophila melanogaster GN=bsf PE=2 SV=2 - [Q9VJ86_DROME]                                               | 53.06 | 15.79    | 1          | 19                | 20         | 26     | 9.390E7 | 1412  | 157.2    | 7.14     |
| P02255    | Histone H1 OS=Drosophila melanogaster GN=His1 PE=1 SV=1 - [H1_DROME]                                                               | 53.03 | 32.42    | 5          | 10                | 10         | 21     | 7.980E8 | 256   | 26.3     | 10.54    |
| P22700    | Calcium-transporting ATPase sarcoplasmic/endoplasmic reticulum type OS=Drosophila melanogaster GN=Ca-P60A PE=1 SV=2 - [ATC1_DROME] | 52.97 | 15.78    | 1          | 12                | 12         | 24     | 8.185E7 | 1020  | 111.6    | 5.41     |
| Q9VEH0    | Aluminum tubes, isoform A OS=Drosophila melanogaster GN=alt PE=4 SV=1 - [Q9VEH0_DROME]                                             | 52.83 | 24.58    | 2          | 14                | 14         | 23     | 1.554E8 | 842   | 95.0     | 7.09     |
| P48809    | Heterogeneous nuclear ribonucleoprotein 27C OS=Drosophila melanogaster GN=Hrb27C PE=1 SV=2 - [RB27C_DROME]                         | 52.72 | 26.84    | 1          | 8                 | 8          | 20     | 1.977E8 | 421   | 44.7     | 6.80     |
| A8JUV4    | Vitellogenin-like OS=Drosophila melanogaster GN=Vml PE=4 SV=1 - [A8JUV4_DROME]                                                     | 52.60 | 16.61    | 1          | 5                 | 5          | 37     | 5.395E8 | 578   | 56.1     | 7.93     |
| Q9VC18    | CG11089 OS=Drosophila melanogaster GN=CG11089 PE=2 SV=1 - [Q9VC18_DROME]                                                           | 52.24 | 30.85    | 1          | 14                | 14         | 27     | 1.581E8 | 590   | 63.3     | 7.87     |
| Q0E8E8    | MIP08013p1 OS=Drosophila melanogaster GN=Mpcp PE=2 SV=1 - [Q0E8E8_DROME]                                                           | 51.65 | 32.30    | 2          | 10                | 10         | 32     | 3.887E8 | 356   | 38.8     | 8.88     |
| P29742    | Clathrin heavy chain OS=Drosophila melanogaster GN=Chc PE=1 SV=1 - [CLH_DROME]                                                     | 51.55 | 13.35    | 1          | 18                | 18         | 33     | 1.537E8 | 1678  | 191.1    | 5.72     |
| E1JJ68    | Rm62, isoform H OS=Drosophila melanogaster GN=Rm62 PE=3 SV=1 - [E1JJ68_DROME]                                                      | 50.82 | 44.17    | 2          | 16                | 19         | 38     | 1.954E8 | 575   | 62.4     | 9.57     |
| Q24208    | Eukaryotic translation initiation factor 2 subunit 3 OS=Drosophila melanogaster GN=eIF-2gamma PE=2 SV=1 - [IF2G_DROME]             | 50.81 | 33.47    | 2          | 14                | 14         | 25     | 2.639E8 | 475   | 51.5     | 8.73     |
| Q9VZ55    | 60S ribosomal protein L28 OS=Drosophila melanogaster GN=RpL28 PE=1 SV=1 - [RL28_DROME]                                             | 50.59 | 56.25    | 1          | 10                | 10         | 26     | 7.826E9 | 144   | 16.0     | 11.09    |
| P61851    | Superoxide dismutase [Cu-Zn] OS=Drosophila melanogaster GN=Sod PE=1 SV=2 - [SODC_DROME]                                            | 50.58 | 54.90    | 2          | 6                 | 6          | 20     | 4.312E8 | 153   | 15.7     | 6.11     |
| Q9W1V3    | rRNA 2'-O-methyltransferase fibrillar OS=Drosophila melanogaster GN=Fib PE=2 SV=1 - [FBRL_DROME]                                   | 49.52 | 38.37    | 1          | 12                | 12         | 32     | 2.681E8 | 344   | 34.6     | 10.29    |
| Q0E9B6    | 40S ribosomal protein S11 OS=Drosophila melanogaster GN=RpS11 PE=1 SV=1 - [RS11_DROME]                                             | 49.26 | 46.45    | 2          | 8                 | 8          | 24     | 1.379E9 | 155   | 18.1     | 10.93    |
| Q9VXY7    | Lipid storage droplets surface-binding protein 2 OS=Drosophila melanogaster GN=Lsd-2 PE=1 SV=1 - [LSD2_DROME]                      | 49.23 | 52.56    | 3          | 2                 | 14         | 28     | 2.904E8 | 352   | 38.2     | 8.41     |
| O61231    | 60S ribosomal protein L10 OS=Drosophila melanogaster GN=RpL10 PE=1 SV=1 - [RL10_DROME]                                             | 49.00 | 45.87    | 1          | 13                | 13         | 32     | 1.324E9 | 218   | 25.5     | 9.85     |
| O97428    | CG4944-PA, isoform A OS=Drosophila melanogaster GN=cib PE=1 SV=1 - [O97428_DROME]                                                  | 48.80 | 48.84    | 2          | 5                 | 5          | 18     | 1.919E8 | 129   | 14.4     | 5.21     |
| Q9VKX2    | Malate dehydrogenase OS=Drosophila melanogaster GN=Mdh1 PE=2 SV=2 - [Q9VKX2_DROME]                                                 | 48.67 | 37.39    | 1          | 11                | 11         | 28     | 5.214E8 | 337   | 36.0     | 7.39     |
| P17704    | 40S ribosomal protein S17 OS=Drosophila melanogaster GN=RpS17 PE=1 SV=2 - [RS17_DROME]                                             | 48.67 | 47.33    | 1          | 6                 | 6          | 22     | 8.419E8 | 131   | 15.3     | 9.94     |
| P55841    | 60S ribosomal protein L14 OS=Drosophila melanogaster GN=RpL14 PE=1 SV=1 - [RL14_DROME]                                             | 48.32 | 40.96    | 1          | 8                 | 8          | 21     | 1.469E9 | 166   | 19.2     | 11.18    |
| O02195    | Eukaryotic translation initiation factor 3 subunit I OS=Drosophila melanogaster GN=Trip1 PE=1 SV=1 - [EIF3I_DROME]                 | 48.09 | 40.80    | 1          | 8                 | 8          | 22     | 2.830E8 | 326   | 36.1     | 5.34     |
| E2QCF1    | ATP citrate lyase, isoform F OS=Drosophila melanogaster GN=ATPCL PE=4 SV=1 - [E2QCF1_DROME]                                        | 47.78 | 11.05    | 2          | 9                 | 9          | 22     | 5.649E7 | 1095  | 119.7    | 7.12     |
| E1JH02    | Lingerer, isoform E OS=Drosophila melanogaster GN=lig PE=4 SV=1 - [E1JH02_DROME]                                                   | 47.52 | 17.87    | 2          | 14                | 14         | 32     | 1.562E8 | 1332  | 134.5    | 6.92     |
| Q9W029    | CG5717-PA OS=Drosophila melanogaster GN=yellow-g PE=2 SV=1 - [Q9W029_DROME]                                                        | 46.15 | 31.30    | 1          | 11                | 11         | 20     | 2.518E8 | 393   | 43.0     | 7.80     |
| Q9V3G1    | 60S ribosomal protein L8 OS=Drosophila melanogaster GN=RpL8 PE=1 SV=1 - [RL8_DROME]                                                | 45.98 | 46.88    | 1          | 11                | 11         | 25     | 1.779E9 | 256   | 27.9     | 11.15    |
| Q9VK69    | T-complex protein 1 subunit delta OS=Drosophila melanogaster GN=CG5525 PE=2 SV=1 - [Q9VK69_DROME]                                  | 45.56 | 46.72    | 1          | 18                | 19         | 33     | 4.374E8 | 533   | 57.1     | 7.56     |
| A1ZAB5    | Protein clueless OS=Drosophila melanogaster GN=clu PE=1 SV=1 - [CLU_DROME]                                                         | 45.33 | 15.40    | 1          | 17                | 17         | 23     | 7.350E7 | 1448  | 160.8    | 6.60     |
| Q961R8    | GH09263p OS=Drosophila melanogaster GN=Aats-gly PE=2 SV=1 - [Q961R8_DROME]                                                         | 45.28 | 20.32    | 3          | 11                | 11         | 24     | 1.333E8 | 679   | 75.8     | 6.40     |
| Q9VXQ5    | GH13725p OS=Drosophila melanogaster GN=Tcp-1zeta PE=2 SV=1 - [Q9VXQ5_DROME]                                                        | 45.13 | 30.77    | 1          | 14                | 14         | 32     | 2.487E8 | 533   | 58.2     | 6.62     |
| Q94511    | NADH-ubiquinone oxidoreductase 75 kDa subunit, mitochondrial OS=Drosophila melanogaster GN=ND75 PE=2 SV=3 - [NDU51_DROME]          | 44.80 | 21.20    | 1          | 12                | 12         | 19     | 1.017E8 | 731   | 78.6     | 6.84     |



| Accession | Description                                                                                                                           | Score | Coverage | # Proteins | # Unique Peptides | # Peptides | # PSMs | Area    | # AAs | MW [kDa] | calc. pI |
|-----------|---------------------------------------------------------------------------------------------------------------------------------------|-------|----------|------------|-------------------|------------|--------|---------|-------|----------|----------|
| Q9W028    | IP19120p OS=Drosophila melanogaster GN=yellow-g2 PE=2 SV=1 - [Q9W028_DROME]                                                           | 44.55 | 30.63    | 1          | 8                 | 8          | 21     | 1.410E8 | 382   | 42.5     | 9.11     |
| Q9V5C6    | Proteasome subunit alpha type-3 OS=Drosophila melanogaster GN=Prosalpha7 PE=1 SV=1 - [PSA3_DROME]                                     | 44.47 | 28.85    | 7          | 5                 | 6          | 23     | 1.826E8 | 253   | 27.7     | 5.69     |
| Q9VAV5    | La-related protein 1 OS=Drosophila melanogaster GN=larp PE=1 SV=5 - [LARP_DROME]                                                      | 44.37 | 16.92    | 1          | 17                | 17         | 24     | 8.740E7 | 1673  | 178.0    | 9.60     |
| P11449    | Vitellogenin-like protein 2 OS=Drosophila melanogaster GN=Vm26Aa PE=2 SV=1 - [VTU1_DROME]                                             | 44.05 | 16.31    | 1          | 2                 | 2          | 26     | 2.952E9 | 141   | 14.3     | 7.75     |
| Q9VNE9    | 60S ribosomal protein L13a OS=Drosophila melanogaster GN=Rpl13A PE=1 SV=1 - [RL13A_DROME]                                             | 43.94 | 33.17    | 1          | 9                 | 9          | 28     | 3.592E8 | 205   | 23.6     | 11.03    |
| P41374    | Eukaryotic translation initiation factor 2 subunit 1 OS=Drosophila melanogaster GN=eIF-2alpha PE=2 SV=1 - [IF2A_DROME]                | 43.87 | 42.23    | 1          | 11                | 11         | 27     | 1.278E8 | 341   | 38.6     | 4.94     |
| Q7K2G1    | Proteasomal ubiquitin receptor ADRM1 homolog OS=Drosophila melanogaster GN=Rpn13 PE=1 SV=1 - [ADRM1_DROME]                            | 43.82 | 33.16    | 1          | 8                 | 8          | 17     | 7.140E7 | 389   | 42.0     | 5.64     |
| Q9VCK0    | Eukaryotic translation initiation factor 3 subunit D-1 OS=Drosophila melanogaster GN=eIF-3p66 PE=1 SV=1 - [EI3D1_DROME]               | 43.74 | 20.89    | 1          | 8                 | 8          | 20     | 1.685E8 | 560   | 63.8     | 7.02     |
| Q9VZ23    | GTP-binding nuclear protein Ran OS=Drosophila melanogaster GN=ran PE=1 SV=1 - [RAN_DROME]                                             | 43.73 | 48.15    | 1          | 11                | 11         | 30     | 4.769E8 | 216   | 24.7     | 7.81     |
| Q9VVA4    | CG9674, isoform A OS=Drosophila melanogaster GN=CG9674 PE=2 SV=2 - [Q9VVA4_DROME]                                                     | 43.46 | 11.64    | 3          | 16                | 16         | 26     | 8.201E7 | 2114  | 231.9    | 6.42     |
| P46415    | Alcohol dehydrogenase class-3 OS=Drosophila melanogaster GN=Fdh PE=1 SV=3 - [ADHX_DROME]                                              | 43.34 | 21.37    | 1          | 6                 | 6          | 22     | 1.542E8 | 379   | 40.4     | 6.71     |
| P06606    | Tubulin alpha-4 chain OS=Drosophila melanogaster GN=alphaTub67C PE=3 SV=1 - [TBA4_DROME]                                              | 43.31 | 30.52    | 1          | 10                | 10         | 23     | 1.419E8 | 462   | 51.1     | 5.26     |
| Q878R1    | CCHC-type zinc finger protein CG3800 OS=Drosophila melanogaster GN=CG3800 PE=1 SV=1 - [Y3800_DROME]                                   | 43.21 | 53.33    | 1          | 8                 | 8          | 16     | 9.602E8 | 165   | 17.6     | 8.65     |
| P12881    | Proteasome subunit alpha type-1 OS=Drosophila melanogaster GN=Prosalpha6 PE=1 SV=1 - [PSA1_DROME]                                     | 43.06 | 41.94    | 1          | 9                 | 9          | 22     | 3.814E8 | 279   | 31.0     | 6.55     |
| Q9W227    | Peptidyl-prolyl cis-trans isomerase OS=Drosophila melanogaster GN=CG2852 PE=2 SV=1 - [Q9W227_DROME]                                   | 42.41 | 57.07    | 1          | 13                | 13         | 31     | 5.491E8 | 205   | 22.2     | 8.75     |
| Q9V9W2    | Ribosomal protein L6, isoform A OS=Drosophila melanogaster GN=Rpl6 PE=1 SV=1 - [Q9V9W2_DROME]                                         | 42.05 | 29.63    | 2          | 12                | 12         | 24     | 1.091E9 | 243   | 27.7     | 10.68    |
| P48375    | 12 kDa FK506-binding protein OS=Drosophila melanogaster GN=FK506-bp2 PE=3 SV=2 - [FKB12_DROME]                                        | 41.94 | 41.67    | 1          | 4                 | 4          | 15     | 5.469E8 | 108   | 11.7     | 8.13     |
| Q9VLM8    | Alanine--tRNA ligase, cytoplasmic OS=Drosophila melanogaster GN=Aats-ala PE=2 SV=1 - [SYAC_DROME]                                     | 41.91 | 22.05    | 1          | 17                | 17         | 28     | 1.119E8 | 966   | 107.7    | 6.13     |
| Q8MZ13    | CG10077, isoform D OS=Drosophila melanogaster GN=CG10077 PE=2 SV=1 - [Q8MZ13_DROME]                                                   | 41.73 | 11.74    | 2          | 4                 | 7          | 19     | 7.545E7 | 818   | 88.2     | 9.36     |
| Q9VRP2    | CG10576, isoform A OS=Drosophila melanogaster GN=CG10576 PE=4 SV=1 - [Q9VRP2_DROME]                                                   | 41.66 | 31.20    | 1          | 11                | 11         | 23     | 6.504E8 | 391   | 42.7     | 7.11     |
| Q9VK18    | CG6287-PA OS=Drosophila melanogaster GN=CG6287 PE=2 SV=1 - [Q9VK18_DROME]                                                             | 41.24 | 46.39    | 1          | 12                | 12         | 33     | 4.454E8 | 332   | 35.2     | 7.36     |
| P07184    | Chorion protein S18 OS=Drosophila melanogaster GN=Cp18 PE=2 SV=2 - [CH18_DROME]                                                       | 41.09 | 44.19    | 1          | 6                 | 6          | 19     | 3.355E8 | 172   | 17.2     | 9.32     |
| P25843    | Profilin OS=Drosophila melanogaster GN=chic PE=1 SV=1 - [PROF_DROME]                                                                  | 41.08 | 59.52    | 1          | 4                 | 4          | 15     | 1.187E8 | 126   | 13.7     | 5.41     |
| P54385    | Glutamate dehydrogenase, mitochondrial OS=Drosophila melanogaster GN=Gdh PE=1 SV=2 - [DHE3_DROME]                                     | 40.42 | 23.49    | 2          | 12                | 12         | 25     | 1.847E8 | 562   | 62.5     | 8.27     |
| Q24407    | ATP synthase-coupling factor 6, mitochondrial OS=Drosophila melanogaster GN=ATPsyn-Cf6 PE=3 SV=1 - [ATP5J_DROME]                      | 40.31 | 30.19    | 1          | 3                 | 3          | 17     | 1.589E8 | 106   | 11.9     | 9.04     |
| Q9VVL7    | Dihydroliipoil dehydrogenase OS=Drosophila melanogaster GN=CG7430 PE=2 SV=1 - [Q9VVL7_DROME]                                          | 40.11 | 21.03    | 1          | 9                 | 9          | 21     | 2.798E8 | 504   | 53.1     | 6.87     |
| O01666    | ATP synthase subunit gamma, mitochondrial OS=Drosophila melanogaster GN=ATPsyn-gamma PE=2 SV=2 - [ATPG_DROME]                         | 40.03 | 35.69    | 1          | 9                 | 9          | 20     | 3.231E8 | 297   | 32.9     | 9.22     |
| E1J1R4    | Na pump alpha subunit, isoform 1 OS=Drosophila melanogaster GN=Atalpha PE=3 SV=1 - [E1J1R4_DROME]                                     | 39.88 | 23.85    | 3          | 18                | 18         | 26     | 1.303E8 | 1002  | 111.1    | 5.49     |
| Q9VQL1    | CG17259, isoform A OS=Drosophila melanogaster GN=CG17259 PE=2 SV=1 - [Q9VQL1_DROME]                                                   | 39.68 | 32.34    | 1          | 11                | 11         | 21     | 3.054E8 | 501   | 56.4     | 6.49     |
| Q9VJV6    | 60S ribosomal protein L24 OS=Drosophila melanogaster GN=Rpl24 PE=1 SV=1 - [RL24_DROME]                                                | 39.64 | 31.61    | 1          | 7                 | 7          | 21     | 1.300E8 | 155   | 17.5     | 11.06    |
| Q9VWH4    | Probable isocitrate dehydrogenase [NAD] subunit alpha, mitochondrial OS=Drosophila melanogaster GN=(1)G0156 PE=2 SV=1 - [IDH3A_DROME] | 39.64 | 31.03    | 2          | 12                | 12         | 28     | 1.697E8 | 377   | 40.8     | 7.36     |
| P08120    | Collagen alpha-1(IV) chain OS=Drosophila melanogaster GN=Cg25C PE=2 SV=3 - [CO4A1_DROME]                                              | 39.47 | 3.88     | 1          | 5                 | 5          | 18     | 1.802E8 | 1779  | 174.2    | 8.60     |
| M9PD08    | Ef1alpha-like factor, isoform C OS=Drosophila melanogaster GN=EIF PE=4 SV=1 - [M9PD08_DROME]                                          | 39.44 | 25.45    | 2          | 11                | 11         | 24     | 1.108E8 | 495   | 55.3     | 7.20     |
| A1Z7H3    | Lethal (2) 44Dea, isoform C OS=Drosophila melanogaster GN=Acsi PE=4 SV=1 - [A1Z7H3_DROME]                                             | 39.12 | 20.79    | 3          | 10                | 10         | 20     | 5.376E7 | 707   | 79.4     | 8.44     |
| A1Z6L9    | FI21274p1 OS=Drosophila melanogaster GN=Trap1 PE=2 SV=1 - [A1Z6L9_DROME]                                                              | 38.56 | 16.93    | 1          | 8                 | 9          | 20     | 4.563E8 | 691   | 77.9     | 7.59     |
| Q9VAN7    | GH13304p OS=Drosophila melanogaster GN=Pglym78 PE=2 SV=2 - [Q9VAN7_DROME]                                                             | 38.52 | 38.43    | 2          | 7                 | 7          | 19     | 1.620E8 | 255   | 28.6     | 6.89     |
| P09491    | Tropomyosin-2 OS=Drosophila melanogaster GN=Tm2 PE=2 SV=1 - [TPM2_DROME]                                                              | 38.49 | 34.86    | 1          | 8                 | 10         | 16     | 2.455E8 | 284   | 33.0     | 4.83     |
| P40304    | Proteasome subunit beta type-1 OS=Drosophila melanogaster GN=Probeta6 PE=2 SV=2 - [PSB1_DROME]                                        | 38.17 | 34.04    | 1          | 6                 | 6          | 28     | 3.720E8 | 235   | 25.8     | 6.54     |
| Q0E993    | Valyl-tRNA synthetase, isoform A OS=Drosophila melanogaster GN=Aats-val PE=3 SV=1 - [Q0E993_DROME]                                    | 38.16 | 15.25    | 1          | 14                | 14         | 21     | 1.041E8 | 1049  | 118.2    | 6.65     |
| Q27331    | V-type proton ATPase catalytic subunit A isoform 2 OS=Drosophila melanogaster GN=Vha68-2 PE=1 SV=2 - [VATA2_DROME]                    | 38.12 | 17.10    | 2          | 3                 | 8          | 19     | 7.456E7 | 614   | 68.3     | 5.34     |
| Q8T3U2    | 40S ribosomal protein S23 OS=Drosophila melanogaster GN=RpS23 PE=1 SV=1 - [RS23_DROME]                                                | 37.96 | 48.25    | 1          | 6                 | 6          | 20     | 7.268E8 | 143   | 16.0     | 10.59    |
| Q7KLV9    | 26S proteasome non-ATPase regulatory subunit 11 OS=Drosophila melanogaster GN=Rpn6 PE=1 SV=1 - [PSD11_DROME]                          | 37.82 | 31.04    | 1          | 10                | 10         | 25     | 2.480E8 | 422   | 47.2     | 5.88     |
| P48588    | 40S ribosomal protein S25 OS=Drosophila melanogaster GN=RpS25 PE=1 SV=3 - [RS25_DROME]                                                | 37.75 | 34.19    | 1          | 5                 | 5          | 23     | 3.184E9 | 117   | 13.2     | 10.27    |
| P45594    | Cofilin/actin-depolymerizing factor homolog OS=Drosophila melanogaster GN=tsr PE=2 SV=1 - [CADF_DROME]                                | 37.70 | 41.89    | 1          | 6                 | 6          | 25     | 9.034E8 | 148   | 17.1     | 7.17     |
| P29613    | Triosephosphate isomerase OS=Drosophila melanogaster GN=Tpi PE=1 SV=3 - [TPIS_DROME]                                                  | 37.60 | 38.87    | 1          | 8                 | 8          | 25     | 4.492E8 | 247   | 26.6     | 6.00     |
| Q7K0E6    | Aspartyl-tRNA synthetase OS=Drosophila melanogaster GN=Aats-asp PE=2 SV=1 - [Q7K0E6_DROME]                                            | 37.57 | 30.51    | 1          | 10                | 10         | 22     | 1.616E8 | 531   | 59.0     | 6.81     |
| P05990    | CAD protein OS=Drosophila melanogaster GN=r PE=1 SV=3 - [PYR1_DROME]                                                                  | 37.53 | 7.82     | 1          | 15                | 15         | 23     | 1.329E8 | 2224  | 246.5    | 6.64     |
| Q27580    | Adenosylhomocysteinase OS=Drosophila melanogaster GN=Ahcy13 PE=2 SV=2 - [SAHH_DROME]                                                  | 37.36 | 45.14    | 2          | 14                | 14         | 28     | 3.695E8 | 432   | 47.3     | 6.20     |
| X2JE34    | RNA-binding protein 2, isoform E OS=Drosophila melanogaster GN=Rbp2 PE=4 SV=1 - [X2JE34_DROME]                                        | 37.32 | 38.17    | 5          | 8                 | 8          | 17     | 1.298E8 | 317   | 34.2     | 9.29     |
| P31409    | V-type proton ATPase subunit B OS=Drosophila melanogaster GN=Vha55 PE=2 SV=1 - [VATB_DROME]                                           | 37.30 | 25.31    | 1          | 11                | 11         | 19     | 2.164E8 | 490   | 54.5     | 5.40     |

| Accession | Description                                                                                                                                  | Score | Coverage | # Proteins | # Unique Peptides | # Peptides | # PSMs | Area    | # AAs | MW [kDa] | calc. pI |
|-----------|----------------------------------------------------------------------------------------------------------------------------------------------|-------|----------|------------|-------------------|------------|--------|---------|-------|----------|----------|
| P08985    | Histone H2A.v OS=Drosophila melanogaster GN=His2Av PE=1 SV=2 - [H2AV_DROME]                                                                  | 37.19 | 29.08    | 1          | 4                 | 6          | 16     | 6.799E8 | 141   | 15.0     | 10.24    |
| Q7K1Q6    | CG42351, isoform B OS=Drosophila melanogaster GN=Jabba PE=2 SV=1 - [Q7K1Q6_DROME]                                                            | 37.12 | 30.94    | 4          | 8                 | 8          | 15     | 3.361E8 | 320   | 35.9     | 5.29     |
| Q9VWD9    | LD38919p OS=Drosophila melanogaster GN=Ubqn PE=1 SV=1 - [Q9VWD9_DROME]                                                                       | 37.00 | 22.67    | 1          | 8                 | 8          | 14     | 2.227E7 | 547   | 58.8     | 5.11     |
| Q8MT58    | CG17337 OS=Drosophila melanogaster GN=CG17337 PE=2 SV=1 - [Q8MT58_DROME]                                                                     | 36.98 | 23.01    | 1          | 9                 | 9          | 21     | 1.899E8 | 478   | 53.1     | 5.66     |
| M9PFW8    | CG32165, isoform B OS=Drosophila melanogaster GN=CG32165 PE=4 SV=1 - [M9PFW8_DROME]                                                          | 36.78 | 7.84     | 4          | 7                 | 7          | 22     | 8.981E7 | 1059  | 118.8    | 4.81     |
| Q7KMQ0    | 26S proteasome regulatory complex subunit p48B OS=Drosophila melanogaster GN=Rpt1 PE=2 SV=1 - [Q7KMQ0_DROME]                                 | 36.78 | 30.02    | 1          | 11                | 11         | 27     | 9.451E7 | 433   | 48.5     | 6.04     |
| Q9VKW5    | CG5355 OS=Drosophila melanogaster GN=CG5355 PE=2 SV=2 - [Q9VKW5_DROME]                                                                       | 36.77 | 19.58    | 2          | 12                | 12         | 19     | 1.594E8 | 756   | 86.3     | 6.19     |
| Q9VMU4    | 60S ribosomal protein L37a OS=Drosophila melanogaster GN=RpL37A PE=1 SV=3 - [RL37A_DROME]                                                    | 36.72 | 55.43    | 1          | 6                 | 6          | 19     | 3.777E8 | 92    | 10.3     | 10.61    |
| Q9VGM2    | CG6783, isoform B OS=Drosophila melanogaster GN=fabp PE=2 SV=1 - [Q9VGM2_DROME]                                                              | 36.62 | 63.08    | 3          | 9                 | 9          | 17     | 8.621E8 | 130   | 14.5     | 5.66     |
| Q9VSA3    | Probable medium-chain specific acyl-CoA dehydrogenase, mitochondrial OS=Drosophila melanogaster GN=CG12262 PE=1 SV=1 - [ACADM_DROME]         | 36.61 | 32.70    | 1          | 10                | 10         | 20     | 1.428E8 | 419   | 45.8     | 7.94     |
| Q94518    | Nascent polypeptide-associated complex subunit alpha OS=Drosophila melanogaster GN=Nacalpa PE=1 SV=2 - [NACA_DROME]                          | 36.23 | 41.94    | 1          | 5                 | 5          | 14     | 3.199E8 | 217   | 23.0     | 4.74     |
| P46222    | 60S ribosomal protein L11 OS=Drosophila melanogaster GN=RpL11 PE=1 SV=2 - [RL11_DROME]                                                       | 36.19 | 29.35    | 1          | 6                 | 6          | 16     | 9.558E8 | 184   | 21.1     | 10.02    |
| Q7KUB0    | Isocitrate dehydrogenase [NADP] OS=Drosophila melanogaster GN=Idh PE=3 SV=1 - [Q7KUB0_DROME]                                                 | 36.13 | 33.41    | 5          | 12                | 12         | 31     | 3.424E8 | 416   | 46.6     | 6.74     |
| Q9VA91    | 40S ribosomal protein S7 OS=Drosophila melanogaster GN=RpS7 PE=1 SV=1 - [RS7_DROME]                                                          | 36.09 | 43.81    | 2          | 10                | 10         | 25     | 1.920E9 | 194   | 22.2     | 9.80     |
| A1ZBB4    | CG30122, isoform B OS=Drosophila melanogaster GN=CG30122 PE=4 SV=1 - [A1ZBB4_DROME]                                                          | 36.07 | 14.00    | 4          | 9                 | 9          | 14     | 3.289E7 | 1271  | 140.4    | 5.01     |
| Q917K6    | Protein NASP homolog OS=Drosophila melanogaster GN=CG8223 PE=1 SV=1 - [NASP_DROME]                                                           | 35.96 | 32.52    | 1          | 7                 | 7          | 16     | 1.849E8 | 492   | 51.9     | 4.39     |
| Q9VNX6    | LD06749p OS=Drosophila melanogaster GN=Nopp140 PE=2 SV=3 - [Q9VNX6_DROME]                                                                    | 35.55 | 9.17     | 4          | 7                 | 7          | 13     | 5.041E7 | 720   | 72.2     | 9.04     |
| Q9VFQ9    | Dipeptidase B, isoform A OS=Drosophila melanogaster GN=Dip-B PE=2 SV=2 - [Q9VFQ9_DROME]                                                      | 35.21 | 19.49    | 1          | 7                 | 7          | 15     | 8.675E7 | 508   | 55.5     | 6.76     |
| O17445    | 60S ribosomal protein L15 OS=Drosophila melanogaster GN=RpL15 PE=1 SV=1 - [RL15_DROME]                                                       | 35.13 | 38.73    | 1          | 9                 | 9          | 19     | 1.274E9 | 204   | 24.3     | 11.47    |
| Q9U3Z7    | NHP2-like protein 1 homolog OS=Drosophila melanogaster GN=hoip PE=2 SV=1 - [NH2L1_DROME]                                                     | 35.06 | 42.52    | 1          | 4                 | 4          | 14     | 1.093E9 | 127   | 13.9     | 7.09     |
| Q94516    | ATP synthase subunit b, mitochondrial OS=Drosophila melanogaster GN=ATPsyn-b PE=2 SV=2 - [AT5F1_DROME]                                       | 34.68 | 20.99    | 1          | 5                 | 5          | 16     | 1.549E8 | 243   | 27.3     | 8.72     |
| Q7KW39    | Probable methylmalonate-semialdehyde dehydrogenase [acylating], mitochondrial OS=Drosophila melanogaster GN=CG17896 PE=2 SV=1 - [MMSA_DROME] | 34.51 | 24.81    | 1          | 10                | 10         | 16     | 1.601E8 | 520   | 55.9     | 8.35     |
| Q9VIX7    | CG15825-PB, isoform B OS=Drosophila melanogaster GN=fon PE=2 SV=1 - [Q9VIX7_DROME]                                                           | 34.40 | 15.08    | 3          | 5                 | 5          | 10     | 1.756E8 | 577   | 58.0     | 6.96     |
| Q9VL18    | Probable elongation factor 1-delta OS=Drosophila melanogaster GN=eEF1delta PE=1 SV=1 - [EF1D_DROME]                                          | 34.39 | 49.61    | 1          | 12                | 12         | 20     | 3.986E8 | 256   | 28.9     | 4.87     |
| Q9VVU2    | CG6846-PA OS=Drosophila melanogaster GN=RpL26 PE=1 SV=1 - [Q9VVU2_DROME]                                                                     | 34.33 | 53.69    | 2          | 10                | 10         | 17     | 1.070E9 | 149   | 17.3     | 10.95    |
| Q9V8M5    | Probable 3-hydroxyisobutyrate dehydrogenase, mitochondrial OS=Drosophila melanogaster GN=CG15093 PE=2 SV=2 - [3HIDH_DROME]                   | 34.32 | 22.53    | 1          | 5                 | 5          | 16     | 6.805E7 | 324   | 33.9     | 8.13     |
| M9NFR5    | Ypsilon schachtel, isoform B OS=Drosophila melanogaster GN=yeps PE=4 SV=1 - [M9NFR5_DROME]                                                   | 34.09 | 34.41    | 2          | 7                 | 7          | 13     | 3.420E8 | 340   | 37.0     | 10.01    |
| Q9VKM1    | Protein piwi OS=Drosophila melanogaster GN=piwi PE=1 SV=1 - [PIWI_DROME]                                                                     | 33.62 | 17.32    | 1          | 13                | 13         | 17     | 1.699E8 | 843   | 97.1     | 9.57     |
| Q9VSD6    | D-Importin 7/RanBP7 OS=Drosophila melanogaster GN=msk PE=2 SV=1 - [Q9VSD6_DROME]                                                             | 33.61 | 13.35    | 10         | 10                | 10         | 18     | 2.328E8 | 1049  | 119.2    | 4.86     |
| B3LF78    | Fmr1, isoform F OS=Drosophila melanogaster GN=Fmr1 PE=2 SV=1 - [B3LF78_DROME]                                                                | 33.53 | 20.90    | 2          | 11                | 11         | 14     | 1.045E8 | 646   | 71.9     | 9.13     |
| Q81PB1    | Deoxyuridine triphosphatase, isoform B OS=Drosophila melanogaster GN=dUTPase PE=2 SV=1 - [Q81PB1_DROME]                                      | 33.20 | 43.10    | 2          | 7                 | 7          | 15     | 4.329E8 | 174   | 18.5     | 5.43     |
| Q9VT04    | MIP04528p OS=Drosophila melanogaster GN=path PE=2 SV=1 - [Q9VT04_DROME]                                                                      | 33.04 | 10.83    | 2          | 3                 | 3          | 13     | 4.782E7 | 471   | 52.0     | 7.71     |
| Q08473    | RNA-binding protein squid OS=Drosophila melanogaster GN=sqd PE=1 SV=3 - [SQD_DROME]                                                          | 33.00 | 18.90    | 1          | 5                 | 5          | 16     | 2.982E8 | 344   | 36.2     | 7.46     |
| Q9W3M7    | CG10777, isoform B OS=Drosophila melanogaster GN=CG10777 PE=2 SV=1 - [Q9W3M7_DROME]                                                          | 32.95 | 15.03    | 1          | 7                 | 9          | 16     | 2.995E7 | 945   | 100.4    | 9.14     |
| Q9VHC7    | FI21236p1 OS=Drosophila melanogaster GN=rump PE=2 SV=1 - [Q9VHC7_DROME]                                                                      | 32.93 | 9.97     | 1          | 4                 | 4          | 12     | 7.924E7 | 632   | 66.7     | 7.85     |
| M9NG39    | Protein on ecdysone puffs, isoform D OS=Drosophila melanogaster GN=Pep PE=4 SV=1 - [M9NG39_DROME]                                            | 32.91 | 16.59    | 2          | 9                 | 9          | 14     | 9.432E7 | 693   | 75.6     | 5.44     |
| Q81RQ5    | LP02262p OS=Drosophila melanogaster GN=(1)G0255 PE=2 SV=1 - [Q81RQ5_DROME]                                                                   | 32.89 | 19.91    | 4          | 7                 | 7          | 14     | 4.471E7 | 467   | 50.4     | 7.53     |
| P29413    | Calreticulin OS=Drosophila melanogaster GN=Crc PE=1 SV=2 - [CALR_DROME]                                                                      | 32.73 | 34.73    | 1          | 11                | 11         | 16     | 2.496E8 | 406   | 46.8     | 4.58     |
| Q9XZ57    | Eb1, isoform E OS=Drosophila melanogaster GN=Eb1 PE=2 SV=1 - [Q9XZ57_DROME]                                                                  | 32.43 | 31.72    | 3          | 6                 | 6          | 16     | 1.289E8 | 290   | 32.5     | 5.34     |
| Q9W0B8    | Coatamer subunit alpha OS=Drosophila melanogaster GN=alphaCOP PE=2 SV=1 - [Q9W0B8_DROME]                                                     | 32.39 | 7.86     | 1          | 6                 | 6          | 16     | 3.791E7 | 1234  | 139.2    | 7.65     |
| O18332    | FI01544p OS=Drosophila melanogaster GN=Rab1 PE=2 SV=1 - [O18332_DROME]                                                                       | 32.25 | 38.54    | 22         | 5                 | 7          | 16     | 1.054E8 | 205   | 22.7     | 5.47     |
| Q917P8    | CG4365, isoform B OS=Drosophila melanogaster GN=CG4365 PE=3 SV=1 - [Q917P8_DROME]                                                            | 31.68 | 29.89    | 3          | 7                 | 7          | 16     | 1.462E8 | 271   | 30.3     | 6.07     |
| Q8SWR8    | Ataxin-2 homolog OS=Drosophila melanogaster GN=Atx2 PE=1 SV=1 - [ATX2_DROME]                                                                 | 31.50 | 13.56    | 1          | 9                 | 9          | 12     | 1.275E8 | 1084  | 117.5    | 8.91     |
| Q9VNE2    | Protein krasavietz OS=Drosophila melanogaster GN=kra PE=1 SV=1 - [PKRA_DROME]                                                                | 31.44 | 16.59    | 1          | 6                 | 6          | 12     | 6.858E7 | 422   | 49.2     | 5.74     |
| Q917R0    | CG18815, isoform A OS=Drosophila melanogaster GN=CG18815 PE=2 SV=1 - [Q917R0_DROME]                                                          | 31.39 | 49.54    | 3          | 7                 | 7          | 21     | 1.037E8 | 216   | 23.1     | 6.28     |
| B7Z0X1    | Serine hydroxymethyltransferase OS=Drosophila melanogaster GN=CG3011 PE=3 SV=1 - [B7Z0X1_DROME]                                              | 31.23 | 20.99    | 2          | 9                 | 9          | 19     | 1.506E8 | 467   | 51.0     | 7.72     |
| O97102    | Small ubiquitin-related modifier OS=Drosophila melanogaster GN=smt3 PE=1 SV=1 - [O97102_DROME]                                               | 31.11 | 44.44    | 1          | 5                 | 5          | 15     | 5.774E8 | 90    | 10.1     | 5.45     |
| Q9VQR2    | CG8844 protein OS=Drosophila melanogaster GN=Pdsw PE=2 SV=1 - [Q9VQR2_DROME]                                                                 | 31.05 | 25.79    | 1          | 3                 | 3          | 9      | 3.567E7 | 159   | 18.9     | 7.01     |
| Q9VHE5    | RH48056p OS=Drosophila melanogaster GN=RpL34b PE=2 SV=1 - [Q9VHE5_DROME]                                                                     | 30.96 | 38.10    | 1          | 2                 | 8          | 19     | 7.204E8 | 168   | 18.4     | 11.52    |
| Q94522    | Succinyl-CoA ligase [ADP/GDP-forming] subunit alpha, mitochondrial OS=Drosophila melanogaster GN=Scsalpha PE=2 SV=3 - [SUCA_DROME]           | 30.95 | 24.70    | 2          | 7                 | 7          | 16     | 2.304E8 | 328   | 34.4     | 8.98     |



| Accession | Description                                                                                                          | Score | Coverage | # Proteins | # Unique Peptides | # Peptides | # PSMs | Area    | # AAs | MW [kDa] | calc. pI |
|-----------|----------------------------------------------------------------------------------------------------------------------|-------|----------|------------|-------------------|------------|--------|---------|-------|----------|----------|
| P91938    | Thioredoxin reductase 1, mitochondrial OS=Drosophila melanogaster GN=Trxr-1 PE=1 SV=2 - [TRXR1_DROME]                | 30.92 | 16.95    | 2          | 9                 | 9          | 21     | 4.125E8 | 596   | 64.3     | 7.91     |
| F0JAN1    | Ade5, isoform B OS=Drosophila melanogaster GN=ade5 PE=2 SV=1 - [F0JAN1_DROME]                                        | 30.78 | 14.25    | 2          | 5                 | 5          | 13     | 8.281E7 | 428   | 47.1     | 8.38     |
| Q9VGS2    | Translationally-controlled tumor protein homolog OS=Drosophila melanogaster GN=Tctp PE=1 SV=1 - [TCTP_DROME]         | 30.73 | 53.49    | 1          | 8                 | 8          | 19     | 2.765E8 | 172   | 19.6     | 4.81     |
| Q9VGV7    | Arginine methyltransferase 1 OS=Drosophila melanogaster GN=Art1 PE=2 SV=1 - [Q9VGV7_DROME]                           | 30.61 | 25.00    | 1          | 7                 | 7          | 12     | 1.741E8 | 376   | 42.8     | 5.15     |
| Q9VPX7    | Adenylyl cyclase-associated protein OS=Drosophila melanogaster GN=capt PE=3 SV=2 - [Q9VPX7_DROME]                    | 30.59 | 29.95    | 2          | 9                 | 9          | 15     | 1.475E8 | 424   | 45.6     | 7.06     |
| Q7KN94    | Walrus, isoform A OS=Drosophila melanogaster GN=wal PE=2 SV=1 - [Q7KN94_DROME]                                       | 30.42 | 27.88    | 1          | 5                 | 5          | 13     | 5.389E7 | 330   | 34.2     | 8.32     |
| P50882    | 60S ribosomal protein L9 OS=Drosophila melanogaster GN=Rpl9 PE=1 SV=2 - [RL9_DROME]                                  | 30.39 | 54.21    | 1          | 10                | 10         | 22     | 4.690E8 | 190   | 21.4     | 9.69     |
| Q9V3V6    | 26S proteasome regulatory complex subunit p50 OS=Drosophila melanogaster GN=Rpt5 PE=2 SV=1 - [Q9V3V6_DROME]          | 30.35 | 28.74    | 1          | 9                 | 9          | 17     | 3.149E8 | 428   | 47.8     | 5.34     |
| P84051    | Histone H2A OS=Drosophila melanogaster GN=His2A PE=1 SV=2 - [H2A_DROME]                                              | 30.32 | 42.74    | 2          | 3                 | 5          | 15     | 6.577E8 | 124   | 13.4     | 10.73    |
| Q24186    | 40S ribosomal protein S5a OS=Drosophila melanogaster GN=RpS5a PE=1 SV=1 - [RS5A_DROME]                               | 30.19 | 28.95    | 1          | 2                 | 9          | 13     | 8.616E8 | 228   | 25.4     | 8.63     |
| Q9VRL0    | CG4769, isoform A OS=Drosophila melanogaster GN=CG4769 PE=2 SV=1 - [Q9VRL0_DROME]                                    | 30.14 | 27.36    | 1          | 7                 | 7          | 22     | 1.971E8 | 307   | 33.7     | 8.53     |
| Q9V434    | Asparaginyl-tRNA synthetase, isoform A OS=Drosophila melanogaster GN=Aats-asn PE=2 SV=1 - [Q9V434_DROME]             | 30.14 | 13.44    | 1          | 7                 | 7          | 17     | 2.022E7 | 558   | 63.9     | 5.96     |
| Q9VNB9    | RE17737p OS=Drosophila melanogaster GN=Rpl35A PE=1 SV=1 - [Q9VNB9_DROME]                                             | 30.07 | 51.59    | 1          | 14                | 14         | 22     | 6.352E8 | 157   | 17.6     | 11.12    |
| Q7KU82    | MIP20544p OS=Drosophila melanogaster GN=smid PE=2 SV=2 - [Q7KU82_DROME]                                              | 29.79 | 11.21    | 4          | 6                 | 6          | 13     | 3.527E7 | 910   | 100.2    | 5.27     |
| P17210    | Kinesin heavy chain OS=Drosophila melanogaster GN=Khc PE=1 SV=2 - [KINH_DROME]                                       | 29.54 | 11.38    | 1          | 9                 | 9          | 12     | 9.697E7 | 975   | 110.3    | 5.77     |
| P02283    | Histone H2B OS=Drosophila melanogaster GN=His2B PE=1 SV=2 - [H2B_DROME]                                              | 29.52 | 45.53    | 1          | 6                 | 6          | 24     | 1.426E9 | 123   | 13.7     | 10.35    |
| Q9VQF7    | Bacchus, isoform B OS=Drosophila melanogaster GN=Bacc PE=2 SV=1 - [Q9VQF7_DROME]                                     | 29.38 | 34.21    | 1          | 5                 | 5          | 14     | 3.439E8 | 152   | 15.5     | 4.04     |
| Q9W401    | Probable citrate synthase, mitochondrial OS=Drosophila melanogaster GN=kdn PE=2 SV=1 - [CISY_DROME]                  | 29.27 | 24.78    | 1          | 10                | 10         | 23     | 1.417E8 | 464   | 51.5     | 8.81     |
| Q8MSW0    | Isoleucyl-tRNA synthetase, isoform A OS=Drosophila melanogaster GN=Aats-ile PE=2 SV=1 - [Q8MSW0_DROME]               | 29.08 | 16.44    | 1          | 18                | 18         | 23     | 9.836E7 | 1229  | 141.0    | 7.52     |
| Q9VZU7    | Ubiquitin carboxyl-terminal hydrolase OS=Drosophila melanogaster GN=CG12082 PE=2 SV=1 - [Q9VZU7_DROME]               | 28.99 | 14.27    | 1          | 9                 | 9          | 17     | 3.097E7 | 827   | 92.0     | 5.49     |
| M9PHG2    | Moesin, isoform M OS=Drosophila melanogaster GN=Moe PE=4 SV=1 - [M9PHG2_DROME]                                       | 28.98 | 25.51    | 3          | 12                | 12         | 17     | 1.548E8 | 584   | 68.8     | 5.99     |
| M9PEJ8    | Rhea, isoform H OS=Drosophila melanogaster GN=rhea PE=4 SV=1 - [M9PEJ8_DROME]                                        | 28.87 | 5.36     | 4          | 8                 | 8          | 11     | 2.421E7 | 2689  | 291.4    | 6.06     |
| Q9W2M4    | CG10527 OS=Drosophila melanogaster GN=CG10527 PE=4 SV=1 - [Q9W2M4_DROME]                                             | 28.49 | 20.95    | 1          | 4                 | 4          | 12     | 5.337E7 | 296   | 31.5     | 4.77     |
| Q7KVQ0    | Probable H/ACA ribonucleoprotein complex subunit 1 OS=Drosophila melanogaster GN=CG4038 PE=1 SV=1 - [GAR1_DROME]     | 28.32 | 32.49    | 1          | 6                 | 6          | 18     | 2.572E8 | 237   | 22.7     | 11.19    |
| Q95WY3    | FI04781p OS=Drosophila melanogaster GN=Nop56 PE=2 SV=1 - [Q95WY3_DROME]                                              | 28.23 | 23.19    | 1          | 9                 | 9          | 15     | 2.452E8 | 496   | 54.8     | 9.28     |
| P28668    | Bifunctional glutamate/proline-tRNA ligase OS=Drosophila melanogaster GN=Aats-glupro PE=1 SV=2 - [SYEP_DROME]        | 28.23 | 11.32    | 1          | 15                | 15         | 21     | 9.768E7 | 1714  | 189.3    | 8.63     |
| Q9VXR5    | CG9281, isoform B OS=Drosophila melanogaster GN=CG9281 PE=2 SV=1 - [Q9VXR5_DROME]                                    | 28.16 | 19.97    | 1          | 11                | 11         | 18     | 1.027E8 | 611   | 69.5     | 7.53     |
| Q7JWQ7    | CG3074, isoform A OS=Drosophila melanogaster GN=Swim PE=2 SV=1 - [Q7JWQ7_DROME]                                      | 27.91 | 18.79    | 1          | 6                 | 6          | 11     | 5.832E7 | 431   | 48.8     | 7.08     |
| P48602    | V-type proton ATPase catalytic subunit A isoform 1 OS=Drosophila melanogaster GN=Vha68-1 PE=2 SV=2 - [VATA1_DROME]   | 27.77 | 12.54    | 2          | 1                 | 6          | 12     | 6.245E7 | 614   | 68.3     | 5.29     |
| P13395    | Spectrin alpha chain OS=Drosophila melanogaster GN=alpha-Spec PE=1 SV=2 - [SPTCA_DROME]                              | 27.70 | 6.67     | 4          | 13                | 13         | 19     | 3.886E7 | 2415  | 278.1    | 5.20     |
| A1ZBE9    | CG15100 OS=Drosophila melanogaster GN=CG15100 PE=3 SV=1 - [A1ZBE9_DROME]                                             | 27.65 | 12.23    | 1          | 9                 | 9          | 14     | 8.335E7 | 1022  | 112.4    | 8.51     |
| Q9VU35    | CG11267-PA OS=Drosophila melanogaster GN=CG11267 PE=2 SV=1 - [Q9VU35_DROME]                                          | 27.63 | 58.25    | 1          | 6                 | 6          | 18     | 7.072E8 | 103   | 11.0     | 9.09     |
| Q9V3K3    | RuvB-like helicase 2 OS=Drosophila melanogaster GN=rept PE=1 SV=1 - [RUVB2_DROME]                                    | 27.42 | 10.19    | 1          | 5                 | 5          | 11     | 1.713E7 | 481   | 53.5     | 5.85     |
| Q9VT32    | CG6767, isoform A OS=Drosophila melanogaster GN=CG6767 PE=2 SV=2 - [Q9VT32_DROME]                                    | 27.39 | 17.14    | 6          | 5                 | 5          | 13     | 1.057E8 | 350   | 38.3     | 7.44     |
| Q9XZJ4    | Proteasome subunit alpha type-6 OS=Drosophila melanogaster GN=Prosalpha1 PE=1 SV=2 - [PSA6_DROME]                    | 27.34 | 36.48    | 1          | 10                | 10         | 17     | 2.972E8 | 244   | 27.1     | 7.66     |
| Q9VB46    | FI18644p1 OS=Drosophila melanogaster GN=Hmu PE=2 SV=1 - [Q9VB46_DROME]                                               | 27.31 | 19.34    | 1          | 8                 | 8          | 15     | 5.158E7 | 579   | 63.4     | 9.35     |
| Q58173    | Chorion protein a at 7F OS=Drosophila melanogaster GN=Cp7Fa PE=2 SV=1 - [Q58173_DROME]                               | 27.21 | 47.78    | 1          | 10                | 10         | 20     | 2.084E8 | 293   | 32.2     | 5.64     |
| Q9VBU9    | 40S ribosomal protein S27 OS=Drosophila melanogaster GN=RpS27 PE=1 SV=1 - [Q9VBU9_DROME]                             | 27.17 | 41.67    | 1          | 5                 | 5          | 19     | 9.340E8 | 84    | 9.4      | 9.52     |
| Q01637    | Uridine 5'-monophosphate synthase OS=Drosophila melanogaster GN=r-i PE=2 SV=2 - [UMPS_DROME]                         | 27.16 | 11.36    | 1          | 4                 | 4          | 15     | 1.522E8 | 493   | 53.4     | 7.25     |
| Q9VNF3    | CG12171 OS=Drosophila melanogaster GN=CG12171 PE=2 SV=1 - [Q9VNF3_DROME]                                             | 27.12 | 26.85    | 1          | 4                 | 6          | 14     | 4.675E7 | 257   | 26.9     | 7.50     |
| Q7JXZ2    | Eip55E OS=Drosophila melanogaster GN=Eip55E PE=2 SV=1 - [Q7JXZ2_DROME]                                               | 27.11 | 22.14    | 1          | 7                 | 7          | 13     | 5.361E7 | 393   | 43.0     | 7.62     |
| Q9VCZ8    | Probable prefoldin subunit 5 OS=Drosophila melanogaster GN=CG7048 PE=2 SV=1 - [PFD5_DROME]                           | 27.09 | 33.33    | 1          | 4                 | 4          | 12     | 3.957E7 | 168   | 19.1     | 7.33     |
| Q8SXM8    | Lysine-tRNA ligase OS=Drosophila melanogaster GN=Aats-lys PE=2 SV=1 - [Q8SXM8_DROME]                                 | 27.02 | 18.29    | 2          | 9                 | 9          | 11     | 5.309E7 | 574   | 64.6     | 6.51     |
| M9PE40    | Ubiquitin carboxyl-terminal hydrolase OS=Drosophila melanogaster GN=Uch PE=3 SV=1 - [M9PE40_DROME]                   | 26.84 | 25.89    | 2          | 4                 | 4          | 11     | 3.624E8 | 224   | 25.4     | 5.49     |
| Q9VBH8    | FI02850p OS=Drosophila melanogaster GN=Rpl34a PE=1 SV=2 - [Q9VBH8_DROME]                                             | 26.78 | 30.86    | 1          | 1                 | 7          | 17     | 7.204E8 | 162   | 18.1     | 11.44    |
| C4NYP8    | Hsc70-interacting protein 1 OS=Drosophila melanogaster GN=HIP PE=1 SV=2 - [F10A1_DROME]                              | 26.48 | 17.77    | 1          | 6                 | 6          | 13     | 1.726E8 | 377   | 41.0     | 5.35     |
| P25161    | Probable 26S proteasome non-ATPase regulatory subunit 3 OS=Drosophila melanogaster GN=Rpn3 PE=2 SV=1 - [PSMD3_DROME] | 26.31 | 18.42    | 1          | 9                 | 9          | 13     | 1.110E8 | 494   | 56.0     | 9.00     |
| Q7PLL3    | Eukaryotic initiation factor 4B OS=Drosophila melanogaster GN=eIF-4B PE=2 SV=1 - [Q7PLL3_DROME]                      | 26.22 | 21.79    | 4          | 7                 | 7          | 12     | 1.134E8 | 459   | 52.2     | 6.96     |
| Q24009    | Protein bicaudal C OS=Drosophila melanogaster GN=Bicc PE=1 SV=2 - [BICC_DROME]                                       | 26.21 | 12.49    | 1          | 6                 | 6          | 10     | 1.047E8 | 905   | 97.8     | 8.66     |
| Q9VFE4    | 40S ribosomal protein S5b OS=Drosophila melanogaster GN=RpS5b PE=2 SV=1 - [RS5B_DROME]                               | 26.18 | 28.70    | 1          | 2                 | 9          | 15     | 1.190E9 | 230   | 25.7     | 8.54     |

| Accession | Description                                                                                                                         | Score | Coverage | # Proteins | # Unique Peptides | # Peptides | # PSMs | Area    | # AAs | MW [kDa] | calc. pI |
|-----------|-------------------------------------------------------------------------------------------------------------------------------------|-------|----------|------------|-------------------|------------|--------|---------|-------|----------|----------|
| P37276    | Dynein heavy chain, cytoplasmic OS=Drosophila melanogaster GN=Dhc64C PE=2 SV=2 - [DYHC_DROME]                                       | 26.10 | 5.07     | 7          | 18                | 18         | 18     | 3.085E8 | 4639  | 529.9    | 6.33     |
| P49630    | 60S ribosomal protein L36 OS=Drosophila melanogaster GN=Rpl36 PE=1 SV=1 - [RL36_DROME]                                              | 26.05 | 38.26    | 1          | 6                 | 6          | 15     | 9.665E8 | 115   | 13.5     | 11.37    |
| Q95083    | Proteasome subunit alpha type-5 OS=Drosophila melanogaster GN=Prosalph5 PE=2 SV=2 - [PSA5_DROME]                                    | 26.03 | 34.43    | 1          | 7                 | 7          | 13     | 1.847E8 | 244   | 26.9     | 4.98     |
| Q9VJ39    | Leukotriene A(4) hydrolase OS=Drosophila melanogaster GN=CG10602 PE=3 SV=3 - [Q9VJ39_DROME]                                         | 25.96 | 20.55    | 4          | 9                 | 9          | 13     | 9.398E7 | 613   | 68.4     | 5.50     |
| P17336    | Catalase OS=Drosophila melanogaster GN=Cat PE=1 SV=2 - [CATA_DROME]                                                                 | 25.90 | 25.69    | 1          | 8                 | 8          | 15     | 4.561E7 | 506   | 57.1     | 8.18     |
| Q9VE79    | CG14309 OS=Drosophila melanogaster GN=CG14309 PE=4 SV=2 - [Q9VE79_DROME]                                                            | 25.77 | 14.08    | 1          | 10                | 10         | 14     | 7.002E7 | 966   | 110.5    | 8.16     |
| O76927    | 40S ribosomal protein S21 OS=Drosophila melanogaster GN=RpS21 PE=1 SV=1 - [RS21_DROME]                                              | 25.77 | 32.53    | 1          | 4                 | 4          | 10     | 6.754E8 | 83    | 9.2      | 5.91     |
| A0AQH0    | Proteasome subunit beta type OS=Drosophila melanogaster GN=Prosbeta1 PE=2 SV=1 - [A0AQH0_DROME]                                     | 25.75 | 39.73    | 1          | 5                 | 5          | 12     | 6.242E7 | 224   | 24.2     | 5.25     |
| Q9VH95    | Uncharacterized protein CG16817 OS=Drosophila melanogaster GN=CG16817 PE=1 SV=1 - [YC17_DROME]                                      | 25.66 | 17.93    | 1          | 5                 | 5          | 15     | 1.609E8 | 184   | 20.7     | 4.60     |
| Q9W3F6    | CG1440, isoform A OS=Drosophila melanogaster GN=CG1440 PE=2 SV=2 - [Q9W3F6_DROME]                                                   | 25.29 | 19.47    | 4          | 8                 | 8          | 14     | 6.931E7 | 488   | 55.1     | 6.01     |
| Q0E924    | LD46344p OS=Drosophila melanogaster GN=Phb2 PE=2 SV=2 - [Q0E924_DROME]                                                              | 25.20 | 31.10    | 3          | 9                 | 9          | 19     | 3.461E8 | 299   | 33.0     | 9.54     |
| Q9VL70    | CG4600-PA OS=Drosophila melanogaster GN=yip2 PE=2 SV=1 - [Q9VL70_DROME]                                                             | 24.81 | 27.89    | 1          | 7                 | 7          | 11     | 5.174E7 | 398   | 41.6     | 8.51     |
| P25171    | Regulator of chromosome condensation OS=Drosophila melanogaster GN=Rcc1 PE=1 SV=2 - [RCC1_DROME]                                    | 24.75 | 16.64    | 1          | 5                 | 5          | 10     | 5.232E7 | 547   | 58.8     | 7.94     |
| Q9W4M4    | CG15570 OS=Drosophila melanogaster GN=CG15570 PE=4 SV=1 - [Q9W4M4_DROME]                                                            | 24.74 | 6.48     | 1          | 6                 | 6          | 10     | 1.642E8 | 1357  | 136.8    | 5.38     |
| P48598    | Eukaryotic translation initiation factor 4E OS=Drosophila melanogaster GN=eIF-4E PE=1 SV=1 - [IF4E_DROME]                           | 24.69 | 33.20    | 1          | 6                 | 6          | 15     | 3.721E8 | 259   | 29.2     | 6.24     |
| O18413    | 26S protease regulatory subunit 8 OS=Drosophila melanogaster GN=Rpt6 PE=1 SV=2 - [PRS8_DROME]                                       | 24.61 | 20.74    | 1          | 1                 | 7          | 12     | 8.638E7 | 405   | 45.8     | 8.41     |
| Q9VUQ5    | Protein argonaute-2 OS=Drosophila melanogaster GN=AGO2 PE=1 SV=3 - [AGO2_DROME]                                                     | 24.47 | 21.00    | 2          | 6                 | 6          | 9      | 6.570E7 | 1214  | 136.8    | 9.61     |
| O97477    | Inositol-3-phosphate synthase OS=Drosophila melanogaster GN=Inos PE=1 SV=1 - [INO1_DROME]                                           | 24.40 | 16.11    | 1          | 7                 | 7          | 13     | 9.587E7 | 565   | 62.2     | 6.23     |
| O46067    | CG2918, isoform B OS=Drosophila melanogaster GN=EG:25E8.1 PE=2 SV=1 - [O46067_DROME]                                                | 24.35 | 10.18    | 1          | 6                 | 6          | 12     | 1.923E7 | 923   | 103.4    | 5.12     |
| Q9VDL2    | LD40493p OS=Drosophila melanogaster GN=TFAM PE=2 SV=1 - [Q9VDL2_DROME]                                                              | 24.33 | 29.57    | 2          | 7                 | 7          | 11     | 6.814E7 | 257   | 29.9     | 9.99     |
| Q9V895    | Acidic leucine-rich nuclear phosphoprotein 32 family member A OS=Drosophila melanogaster GN=Anp32a PE=2 SV=1 - [AN32A_DROME]        | 24.32 | 21.84    | 2          | 5                 | 5          | 11     | 1.219E8 | 261   | 29.2     | 4.21     |
| P52029    | Glucose-6-phosphate isomerase OS=Drosophila melanogaster GN=Pgi PE=2 SV=2 - [G6PI_DROME]                                            | 24.28 | 14.70    | 1          | 5                 | 5          | 17     | 1.456E8 | 558   | 62.3     | 7.12     |
| O77410    | Eukaryotic translation initiation factor 3 subunit E OS=Drosophila melanogaster GN=eIF3-S6 PE=2 SV=1 - [EIF3E_DROME]                | 24.21 | 17.01    | 1          | 7                 | 7          | 14     | 2.093E8 | 435   | 51.1     | 6.79     |
| Q9VMB9    | CG11015-PA OS=Drosophila melanogaster GN=CoVb PE=2 SV=1 - [Q9VMB9_DROME]                                                            | 24.17 | 31.67    | 1          | 3                 | 3          | 17     | 1.800E8 | 120   | 13.6     | 8.69     |
| Q8SXC2    | CG6950, isoform A OS=Drosophila melanogaster GN=CG6950-RC PE=2 SV=1 - [Q8SXC2_DROME]                                                | 24.12 | 8.00     | 1          | 2                 | 2          | 8      | 4.781E7 | 450   | 51.2     | 7.72     |
| Q7KRU8    | Ferritin OS=Drosophila melanogaster GN=Fer1HCH PE=2 SV=1 - [Q7KRU8_DROME]                                                           | 24.09 | 20.49    | 2          | 3                 | 3          | 11     | 2.973E7 | 205   | 23.1     | 5.87     |
| Q7K4L8    | CG7878 OS=Drosophila melanogaster GN=CG7878 PE=2 SV=1 - [Q7K4L8_DROME]                                                              | 24.08 | 6.97     | 1          | 3                 | 4          | 11     | 3.483E7 | 703   | 78.5     | 6.70     |
| P35415    | Paramyosin, long form OS=Drosophila melanogaster GN=Prrm PE=1 SV=1 - [MYS1_DROME]                                                   | 24.06 | 12.97    | 2          | 9                 | 9          | 13     | 1.546E8 | 879   | 102.3    | 5.58     |
| M9MS06    | Alpha actinin, isoform D OS=Drosophila melanogaster GN=Actn PE=4 SV=1 - [M9MS06_DROME]                                              | 24.04 | 10.39    | 4          | 8                 | 8          | 13     | 3.183E7 | 895   | 103.8    | 5.64     |
| P17917    | Proliferating cell nuclear antigen OS=Drosophila melanogaster GN=PCNA PE=1 SV=2 - [PCNA_DROME]                                      | 23.91 | 37.69    | 1          | 8                 | 8          | 16     | 2.180E8 | 260   | 28.8     | 4.81     |
| Q81NM3    | Protein slender lobes OS=Drosophila melanogaster GN=sle PE=1 SV=1 - [SLE_DROME]                                                     | 23.90 | 9.72     | 2          | 10                | 10         | 12     | 7.738E7 | 1420  | 158.6    | 5.24     |
| P05205    | Heterochromatin protein 1 OS=Drosophila melanogaster GN=Su(var)205 PE=1 SV=2 - [HP1_DROME]                                          | 23.87 | 16.99    | 1          | 2                 | 2          | 11     | 7.786E7 | 206   | 23.2     | 5.08     |
| A4UZW2    | S-adenosylmethionine synthase OS=Drosophila melanogaster GN=Sam-S PE=3 SV=1 - [A4UZW2_DROME]                                        | 23.75 | 18.38    | 11         | 6                 | 6          | 16     | 1.024E8 | 408   | 44.8     | 6.54     |
| Q9W1H8    | GH13256p OS=Drosophila melanogaster GN=Thiolase PE=2 SV=1 - [Q9W1H8_DROME]                                                          | 23.73 | 13.65    | 1          | 6                 | 6          | 14     | 1.225E8 | 469   | 50.6     | 9.14     |
| Q9W229    | 40S ribosomal protein S24 OS=Drosophila melanogaster GN=RpS24 PE=1 SV=1 - [Q9W229_DROME]                                            | 23.72 | 17.56    | 1          | 3                 | 3          | 12     | 3.963E8 | 131   | 15.0     | 11.22    |
| P06754    | Tropomyosin-1, isoforms 9A/A/B OS=Drosophila melanogaster GN=Tm1 PE=2 SV=2 - [TPM1_DROME]                                           | 23.59 | 42.48    | 5          | 4                 | 16         | 19     | 2.686E8 | 339   | 39.3     | 4.94     |
| Q9VA54    | Rpt6R OS=Drosophila melanogaster GN=Rpt6R PE=2 SV=1 - [Q9VA54_DROME]                                                                | 23.58 | 20.80    | 1          | 1                 | 7          | 12     | 7.400E7 | 399   | 45.1     | 7.97     |
| Q9VZ69    | CG1691-PA, isoform A OS=Drosophila melanogaster GN=Imp PE=2 SV=2 - [Q9VZ69_DROME]                                                   | 23.49 | 14.66    | 5          | 7                 | 7          | 12     | 1.320E8 | 566   | 62.1     | 9.61     |
| Q810J1    | CG1910, isoform B OS=Drosophila melanogaster GN=CG1910 PE=2 SV=1 - [Q810J1_DROME]                                                   | 23.42 | 23.01    | 3          | 7                 | 7          | 10     | 5.806E7 | 439   | 45.9     | 4.49     |
| Q9VQR8    | CG33123, isoform A OS=Drosophila melanogaster GN=CG33123 PE=3 SV=2 - [Q9VQR8_DROME]                                                 | 23.12 | 18.70    | 1          | 15                | 15         | 21     | 1.349E8 | 1182  | 134.8    | 7.64     |
| Q9V455    | Importin subunit alpha OS=Drosophila melanogaster GN=Kap-alpha3 PE=2 SV=1 - [Q9V455_DROME]                                          | 23.00 | 11.67    | 1          | 4                 | 4          | 7      | 4.770E7 | 514   | 57.0     | 5.26     |
| P56538    | Eukaryotic translation initiation factor 6 OS=Drosophila melanogaster GN=eIF6 PE=2 SV=3 - [IF6_DROME]                               | 22.96 | 37.96    | 1          | 5                 | 5          | 11     | 1.242E8 | 245   | 26.5     | 4.73     |
| A1ZBJ2    | CG7461 OS=Drosophila melanogaster GN=CG7461 PE=3 SV=2 - [A1ZBJ2_DROME]                                                              | 22.93 | 16.43    | 1          | 9                 | 9          | 11     | 7.726E7 | 627   | 68.3     | 7.77     |
| P53777    | Muscle LIM protein 1 OS=Drosophila melanogaster GN=Mlp60A PE=2 SV=1 - [MLP1_DROME]                                                  | 22.73 | 51.09    | 2          | 3                 | 4          | 8      | 2.858E7 | 92    | 10.0     | 8.24     |
| Q9V3G7    | 26S proteasome non-ATPase regulatory subunit 6 OS=Drosophila melanogaster GN=Rpn7 PE=2 SV=1 - [PSMD6_DROME]                         | 22.40 | 25.71    | 10         | 8                 | 8          | 14     | 1.297E8 | 389   | 45.4     | 6.48     |
| Q9VSR5    | CG5012-PA OS=Drosophila melanogaster GN=mRpl12 PE=2 SV=1 - [Q9VSR5_DROME]                                                           | 22.25 | 42.31    | 1          | 7                 | 7          | 15     | 2.604E8 | 182   | 19.6     | 8.75     |
| P04359    | 60S ribosomal protein L32 OS=Drosophila melanogaster GN=Rpl32 PE=1 SV=3 - [RL32_DROME]                                              | 22.20 | 32.84    | 1          | 5                 | 5          | 14     | 8.653E8 | 134   | 16.0     | 11.40    |
| Q9VAC1    | CG7920, isoform A OS=Drosophila melanogaster GN=CG7920 PE=2 SV=1 - [Q9VAC1_DROME]                                                   | 22.19 | 22.43    | 2          | 8                 | 8          | 15     | 2.023E8 | 477   | 51.8     | 8.12     |
| P36179    | Serine/threonine-protein phosphatase PP2A 65 kDa regulatory subunit OS=Drosophila melanogaster GN=Pp2A-29B PE=2 SV=4 - [2A2A_DROME] | 22.17 | 20.30    | 3          | 10                | 10         | 13     | 1.705E8 | 591   | 65.4     | 5.05     |
| Q9V4E0    | CG1970, isoform B OS=Drosophila melanogaster GN=CG1970-RA PE=2 SV=2 - [Q9V4E0_DROME]                                                | 22.06 | 13.68    | 1          | 4                 | 4          | 13     | 2.788E7 | 468   | 52.9     | 6.67     |

| Accession | Description                                                                                                                  | Score | Coverage | # Proteins | # Unique Peptides | # Peptides | # PSMs | Area    | # AAs | MW [kDa] | calc. pI |
|-----------|------------------------------------------------------------------------------------------------------------------------------|-------|----------|------------|-------------------|------------|--------|---------|-------|----------|----------|
| P48601    | 26S protease regulatory subunit 4 OS=Drosophila melanogaster GN=Rpt2 PE=1 SV=2 - [PRS4_DROME]                                | 22.04 | 23.92    | 1          | 8                 | 8          | 17     | 1.786E8 | 439   | 49.3     | 6.58     |
| Q9VHI8    | CG11980, isoform A OS=Drosophila melanogaster GN=CG11980 PE=4 SV=2 - [Q9VHI8_DROME]                                          | 22.01 | 15.36    | 3          | 4                 | 4          | 8      | 1.482E8 | 345   | 39.2     | 6.54     |
| Q9VAN0    | Probable phosphoserine aminotransferase OS=Drosophila melanogaster GN=CG11899 PE=2 SV=1 - [SERC_DROME]                       | 21.99 | 23.08    | 1          | 7                 | 7          | 17     | 8.777E7 | 364   | 39.5     | 8.41     |
| Q27294    | RNA-binding protein cabeza OS=Drosophila melanogaster GN=caz PE=2 SV=2 - [CAZ_DROME]                                         | 21.92 | 23.56    | 3          | 5                 | 5          | 10     | 6.650E7 | 399   | 38.8     | 9.36     |
| Q27889    | Serine/threonine-protein phosphatase 2B catalytic subunit 2 OS=Drosophila melanogaster GN=Pp2B-14D PE=1 SV=2 - [PP2B2_DROME] | 21.92 | 15.79    | 3          | 7                 | 7          | 11     | 6.819E7 | 570   | 63.1     | 5.88     |
| Q9VHJ8    | SkpA associated protein, isoform A OS=Drosophila melanogaster GN=skap PE=3 SV=2 - [Q9VHJ8_DROME]                             | 21.85 | 16.14    | 2          | 6                 | 6          | 11     | 1.264E8 | 502   | 54.8     | 8.66     |
| Q9VLK2    | Ribosomal L1 domain-containing protein CG13096 OS=Drosophila melanogaster GN=CG13096 PE=1 SV=1 - [Y3096_DROME]               | 21.84 | 14.24    | 1          | 8                 | 8          | 11     | 1.267E8 | 681   | 74.3     | 8.51     |
| Q9W125    | CG3683 protein OS=Drosophila melanogaster GN=NDUF8 PE=2 SV=1 - [Q9W125_DROME]                                                | 21.57 | 28.57    | 1          | 4                 | 4          | 10     | 3.968E7 | 175   | 19.8     | 6.87     |
| P84029    | Cytochrome c-2 OS=Drosophila melanogaster GN=Cyt-c-p PE=1 SV=2 - [CYC2_DROME]                                                | 21.56 | 37.96    | 1          | 5                 | 5          | 15     | 2.454E8 | 108   | 11.7     | 9.57     |
| Q9Y125    | BcDNA.GH08312 OS=Drosophila melanogaster GN=Sap-r PE=2 SV=1 - [Q9Y125_DROME]                                                 | 21.52 | 10.81    | 2          | 9                 | 9          | 15     | 1.307E8 | 953   | 105.9    | 4.97     |
| M9PHR2    | Upheld, isoform O OS=Drosophila melanogaster GN=up PE=4 SV=1 - [M9PHR2_DROME]                                                | 21.51 | 17.63    | 8          | 6                 | 6          | 11     | 5.304E7 | 397   | 47.5     | 4.67     |
| Q9W414    | Regulatory particle triple-A ATPase 4 OS=Drosophila melanogaster GN=Rpt4 PE=3 SV=3 - [Q9W414_DROME]                          | 21.34 | 23.43    | 2          | 9                 | 9          | 15     | 7.905E7 | 397   | 44.9     | 8.07     |
| Q9V9M7    | RE62581p OS=Drosophila melanogaster GN=RpL21 PE=1 SV=1 - [Q9V9M7_DROME]                                                      | 21.21 | 25.79    | 1          | 5                 | 5          | 12     | 4.555E8 | 159   | 18.5     | 10.55    |
| Q8SYJ2    | CG32230, isoform B OS=Drosophila melanogaster GN=CG32230 PE=2 SV=1 - [Q8SYJ2_DROME]                                          | 21.19 | 37.35    | 1          | 4                 | 4          | 11     | 1.358E8 | 83    | 9.4      | 9.26     |
| Q9VEN1    | Filamin-A OS=Drosophila melanogaster GN=cher PE=1 SV=2 - [FLNA_DROME]                                                        | 21.18 | 7.51     | 4          | 13                | 13         | 15     | 3.189E7 | 2210  | 239.0    | 6.11     |
| P22769    | Proteasome subunit alpha type-7-1 OS=Drosophila melanogaster GN=Prosalpha4 PE=1 SV=2 - [PSA71_DROME]                         | 20.89 | 27.71    | 2          | 7                 | 7          | 11     | 1.769E8 | 249   | 28.0     | 8.12     |
| A1ZAH8    | Ribosomal protein S15, isoform B OS=Drosophila melanogaster GN=RpS15 PE=2 SV=1 - [A1ZAH8_DROME]                              | 20.78 | 22.45    | 2          | 4                 | 4          | 12     | 7.219E8 | 147   | 17.0     | 10.33    |
| M9PE74    | No circadian temperature entrainment, isoform D OS=Drosophila melanogaster GN=nocte PE=4 SV=1 - [M9PE74_DROME]               | 20.71 | 8.33     | 2          | 10                | 10         | 11     | 3.260E7 | 2305  | 234.9    | 9.25     |
| P22058    | Chromosomal protein D1 OS=Drosophila melanogaster GN=D1 PE=1 SV=3 - [CPD1_DROME]                                             | 20.55 | 25.92    | 1          | 7                 | 7          | 11     | 1.055E8 | 355   | 37.0     | 6.64     |
| Q9W3N9    | CG10932, isoform A OS=Drosophila melanogaster GN=CG10932 PE=2 SV=1 - [Q9W3N9_DROME]                                          | 20.54 | 20.49    | 1          | 5                 | 5          | 8      | 3.444E7 | 410   | 43.4     | 8.68     |
| M9PCG1    | CG5261, isoform E OS=Drosophila melanogaster GN=CG5261 PE=3 SV=1 - [M9PCG1_DROME]                                            | 20.53 | 19.56    | 5          | 9                 | 9          | 16     | 5.529E7 | 496   | 52.8     | 9.55     |
| P20477    | Glutamine synthetase 1, mitochondrial OS=Drosophila melanogaster GN=Gsl PE=2 SV=3 - [GLNA1_DROME]                            | 20.35 | 22.31    | 1          | 4                 | 4          | 10     | 6.535E7 | 399   | 44.4     | 6.46     |
| Q9VNS0    | Eukaryotic translation initiation factor 3 subunit F-1 OS=Drosophila melanogaster GN=eIF3-S5-1 PE=2 SV=1 - [E13F1_DROME]     | 20.23 | 22.50    | 1          | 4                 | 4          | 8      | 5.906E7 | 280   | 31.1     | 6.52     |
| Q9W2X6    | Lethal (1) G0230, isoform A OS=Drosophila melanogaster GN=(1)G0230 PE=2 SV=1 - [Q9W2X6_DROME]                                | 20.21 | 42.68    | 1          | 6                 | 6          | 10     | 2.411E8 | 157   | 16.7     | 5.99     |
| Q9VZF9    | Cuticular protein 64Ad OS=Drosophila melanogaster GN=Cpr64Ad PE=2 SV=2 - [Q9VZF9_DROME]                                      | 20.20 | 28.34    | 1          | 4                 | 4          | 9      | 1.419E7 | 247   | 24.3     | 5.45     |
| Q9VJ43    | LD10783p OS=Drosophila melanogaster GN=ScpX PE=2 SV=1 - [Q9VJ43_DROME]                                                       | 20.17 | 13.05    | 2          | 5                 | 5          | 8      | 6.785E7 | 544   | 59.0     | 7.78     |
| P80455    | 40S ribosomal protein S12 OS=Drosophila melanogaster GN=RpS12 PE=1 SV=2 - [RS12_DROME]                                       | 19.98 | 51.80    | 1          | 7                 | 7          | 13     | 4.998E8 | 139   | 15.2     | 6.38     |
| Q9VR96    | IP02009p OS=Drosophila melanogaster GN=Obp19c PE=2 SV=1 - [Q9VR96_DROME]                                                     | 19.87 | 29.71    | 1          | 4                 | 4          | 9      | 1.660E8 | 175   | 19.4     | 9.07     |
| Q9W0Y1    | Troponin C-akin-1 protein OS=Drosophila melanogaster GN=Tina-1 PE=2 SV=1 - [TINA1_DROME]                                     | 19.81 | 26.35    | 2          | 3                 | 3          | 10     | 1.463E7 | 167   | 19.0     | 7.44     |
| A1Z9E3    | Elongation factor Tu OS=Drosophila melanogaster GN=EFTuM PE=3 SV=1 - [A1Z9E3_DROME]                                          | 19.78 | 16.16    | 1          | 5                 | 5          | 10     | 1.362E8 | 489   | 54.0     | 8.03     |
| Q9U9Q4    | Eukaryotic translation initiation factor 3 subunit H OS=Drosophila melanogaster GN=eIF-3p40 PE=2 SV=2 - [EIF3H_DROME]        | 19.69 | 19.23    | 1          | 6                 | 6          | 13     | 1.294E8 | 338   | 38.4     | 6.10     |
| Q9VV60    | LD21116p OS=Drosophila melanogaster GN=Aats-tyr PE=2 SV=1 - [Q9VV60_DROME]                                                   | 19.61 | 22.86    | 1          | 10                | 10         | 11     | 1.921E8 | 525   | 58.1     | 6.87     |
| Q9W3Y3    | CG3226-PA OS=Drosophila melanogaster GN=CG3226 PE=2 SV=1 - [Q9W3Y3_DROME]                                                    | 19.60 | 19.57    | 1          | 4                 | 4          | 10     | 7.897E7 | 230   | 25.8     | 6.96     |
| Q9XZU1    | Exportin-2 OS=Drosophila melanogaster GN=Cas PE=2 SV=2 - [XPO2_DROME]                                                        | 19.46 | 6.15     | 1          | 5                 | 5          | 10     | 1.242E8 | 975   | 110.1    | 5.82     |
| Q24492    | Replication protein A 70 kDa DNA-binding subunit OS=Drosophila melanogaster GN=RpA-70 PE=1 SV=1 - [RFA1_DROME]               | 19.42 | 18.74    | 1          | 11                | 11         | 13     | 2.297E8 | 603   | 66.6     | 6.76     |
| Q9VLB7    | GDP dissociation inhibitor, isoform A OS=Drosophila melanogaster GN=Gdi PE=2 SV=1 - [Q9VLB7_DROME]                           | 19.37 | 26.64    | 1          | 11                | 11         | 26     | 3.900E8 | 443   | 49.9     | 5.72     |
| Q9W3W8    | 60S ribosomal protein L17 OS=Drosophila melanogaster GN=RpL17 PE=1 SV=1 - [RL17_DROME]                                       | 19.31 | 20.97    | 1          | 6                 | 6          | 8      | 5.997E7 | 186   | 21.6     | 10.30    |
| Q9VKM3    | CG6105-PA OS=Drosophila melanogaster GN=(2)06225 PE=2 SV=1 - [Q9VKM3_DROME]                                                  | 19.30 | 15.15    | 1          | 1                 | 1          | 8      | 1.497E8 | 99    | 10.9     | 9.76     |
| Q9VTY2    | CG10638, isoform A OS=Drosophila melanogaster GN=CG10638 PE=4 SV=1 - [Q9VTY2_DROME]                                          | 19.27 | 16.72    | 2          | 4                 | 4          | 12     | 1.093E8 | 317   | 35.8     | 6.11     |
| P32234    | GTP-binding protein 128up OS=Drosophila melanogaster GN=128up PE=2 SV=2 - [128UP_DROME]                                      | 19.19 | 22.83    | 1          | 6                 | 6          | 11     | 4.471E7 | 368   | 41.1     | 8.60     |
| Q9VVC5    | Neural conserved at 73EF, isoform A OS=Drosophila melanogaster GN=Nc73EF PE=2 SV=2 - [Q9VVC5_DROME]                          | 19.14 | 5.56     | 3          | 4                 | 4          | 11     | 3.570E7 | 1008  | 112.5    | 6.89     |
| Q27268    | ATP-dependent RNA helicase WM6 OS=Drosophila melanogaster GN=Hel25E PE=1 SV=1 - [DX39B_DROME]                                | 19.05 | 16.04    | 2          | 7                 | 7          | 12     | 1.835E8 | 424   | 48.6     | 5.66     |
| Q9VL89    | Methionine aminopeptidase 2 OS=Drosophila melanogaster GN=und PE=2 SV=1 - [Q9VL89_DROME]                                     | 19.03 | 23.44    | 1          | 10                | 10         | 14     | 1.637E8 | 448   | 49.8     | 6.68     |
| Q960M4    | LD45324p OS=Drosophila melanogaster GN=Prx5 PE=2 SV=1 - [Q960M4_DROME]                                                       | 19.02 | 39.47    | 1          | 5                 | 5          | 11     | 9.516E7 | 190   | 19.9     | 8.68     |
| Q9VB10    | CG5590 OS=Drosophila melanogaster GN=CG5590 PE=2 SV=1 - [Q9VB10_DROME]                                                       | 18.98 | 15.05    | 1          | 4                 | 4          | 10     | 2.112E7 | 412   | 44.3     | 8.02     |
| P54357    | Myosin-2 essential light chain OS=Drosophila melanogaster GN=Mlc-c PE=1 SV=1 - [MLC2_DROME]                                  | 18.97 | 38.10    | 2          | 6                 | 6          | 12     | 9.945E7 | 147   | 16.6     | 4.59     |
| Q8IRG6    | FACT complex subunit spt16 OS=Drosophila melanogaster GN=dre4 PE=1 SV=2 - [SPT16_DROME]                                      | 18.88 | 8.96     | 1          | 7                 | 7          | 10     | 3.734E7 | 1083  | 123.5    | 6.29     |
| Q24154    | 60S ribosomal protein L29 OS=Drosophila melanogaster GN=RpL29 PE=1 SV=1 - [RL29_DROME]                                       | 18.78 | 32.89    | 1          | 4                 | 4          | 7      | 1.161E9 | 76    | 8.9      | 11.34    |
| Q94514    | Cytochrome c oxidase subunit 5A, mitochondrial OS=Drosophila melanogaster GN=CoVa PE=1 SV=2 - [COX5A_DROME]                  | 18.77 | 51.01    | 1          | 8                 | 8          | 20     | 2.286E8 | 149   | 16.6     | 5.68     |
| Q95RA9    | CG9796 OS=Drosophila melanogaster GN=GILT1 PE=2 SV=1 - [Q95RA9_DROME]                                                        | 18.68 | 34.00    | 1          | 5                 | 5          | 12     | 6.365E7 | 250   | 27.7     | 7.33     |

| Accession | Description                                                                                                                                 | Score | Coverage | # Proteins | # Unique Peptides | # Peptides | # PSMs | Area    | # AAs | MW [kDa] | calc. pI |
|-----------|---------------------------------------------------------------------------------------------------------------------------------------------|-------|----------|------------|-------------------|------------|--------|---------|-------|----------|----------|
| P35421    | Phosphoribosylformylglycinamide synthase OS=Drosophila melanogaster GN=ade2 PE=1 SV=2 - [PUR4_DROME]                                        | 18.57 | 8.12     | 1          | 6                 | 6          | 7      | 1.934E7 | 1354  | 148.0    | 5.68     |
| Q9VRD9    | Cystathionine beta-synthase OS=Drosophila melanogaster GN=Cbs PE=1 SV=1 - [Q9VRD9_DROME]                                                    | 18.44 | 10.54    | 1          | 4                 | 4          | 9      | 4.113E7 | 522   | 56.8     | 7.06     |
| Q59E30    | Failed axon connections, isoform C OS=Drosophila melanogaster GN=fax PE=4 SV=1 - [Q59E30_DROME]                                             | 18.43 | 25.54    | 6          | 8                 | 8          | 9      | 1.102E8 | 415   | 46.6     | 5.25     |
| P18053    | Proteasome subunit alpha type-4 OS=Drosophila melanogaster GN=Prosalpha3 PE=1 SV=2 - [PSA4_DROME]                                           | 18.42 | 29.92    | 2          | 6                 | 6          | 11     | 4.130E8 | 264   | 29.4     | 7.15     |
| Q95RF6    | CG7654-PA OS=Drosophila melanogaster GN=Tom20 PE=2 SV=1 - [Q95RF6_DROME]                                                                    | 18.35 | 13.45    | 1          | 1                 | 1          | 5      | 1.485E7 | 171   | 18.8     | 7.24     |
| Q24572    | Probable histone-binding protein Caf1 OS=Drosophila melanogaster GN=Caf1 PE=1 SV=1 - [CAF1_DROME]                                           | 18.34 | 13.49    | 3          | 5                 | 5          | 8      | 1.531E8 | 430   | 48.6     | 4.89     |
| Q9VIE7    | Burgundy, isoform B OS=Drosophila melanogaster GN=bur PE=2 SV=3 - [Q9VIE7_DROME]                                                            | 18.33 | 11.13    | 1          | 5                 | 5          | 9      | 3.291E7 | 683   | 76.7     | 6.80     |
| P20240    | Otefin OS=Drosophila melanogaster GN=Ote PE=1 SV=2 - [OTE_DROME]                                                                            | 18.30 | 25.71    | 1          | 7                 | 7          | 8      | 5.587E7 | 424   | 46.6     | 9.55     |
| Q9VYW3    | CG15220-PA OS=Drosophila melanogaster GN=RPA3 PE=1 SV=1 - [Q9VYW3_DROME]                                                                    | 18.20 | 26.79    | 1          | 2                 | 2          | 6      | 1.354E8 | 112   | 12.0     | 5.43     |
| Q9VTU4    | Eukaryotic translation initiation factor 3 subunit L OS=Drosophila melanogaster GN=CG5642 PE=2 SV=1 - [EIF3L_DROME]                         | 18.16 | 13.73    | 1          | 7                 | 7          | 13     | 6.743E7 | 539   | 63.2     | 5.96     |
| Q9U915    | Adenylate kinase OS=Drosophila melanogaster GN=Adk2 PE=1 SV=1 - [KAD2_DROME]                                                                | 18.16 | 36.67    | 1          | 7                 | 7          | 9      | 4.538E7 | 240   | 26.5     | 7.88     |
| A127J7    | Sec31, isoform A OS=Drosophila melanogaster GN=Sec31 PE=4 SV=1 - [A127J7_DROME]                                                             | 18.14 | 4.52     | 2          | 3                 | 3          | 6      | 2.117E7 | 1240  | 135.9    | 6.14     |
| Q9V3W7    | LD40489p OS=Drosophila melanogaster GN=SF2 PE=2 SV=1 - [Q9V3W7_DROME]                                                                       | 17.96 | 21.18    | 1          | 5                 | 5          | 15     | 8.696E7 | 255   | 28.3     | 9.91     |
| Q7JRC0    | CG12384 OS=Drosophila melanogaster GN=CG12384 PE=2 SV=1 - [Q7JRC0_DROME]                                                                    | 17.71 | 26.04    | 1          | 1                 | 1          | 6      | 4.432E7 | 96    | 9.9      | 9.31     |
| Q9V405    | 26S proteasome regulatory complex subunit p48A OS=Drosophila melanogaster GN=Rpt3 PE=2 SV=1 - [Q9V405_DROME]                                | 17.67 | 19.13    | 2          | 7                 | 7          | 12     | 1.041E8 | 413   | 47.0     | 5.38     |
| Q7K7G0    | Coat protein (Coatome) delta, isoform B OS=Drosophila melanogaster GN=deltaCOP PE=4 SV=1 - [Q7K7G0_DROME]                                   | 17.64 | 14.31    | 2          | 5                 | 5          | 7      | 2.327E7 | 531   | 57.8     | 6.20     |
| Q9VMV9    | Reticulon-like protein OS=Drosophila melanogaster GN=Rtnl1 PE=4 SV=2 - [Q9VMV9_DROME]                                                       | 17.52 | 20.17    | 6          | 5                 | 8          | 11     | 4.703E7 | 595   | 63.9     | 4.83     |
| Q7K3B7    | CG11208 OS=Drosophila melanogaster GN=CG11208 PE=2 SV=1 - [Q7K3B7_DROME]                                                                    | 17.48 | 10.92    | 1          | 4                 | 4          | 8      | 5.879E7 | 568   | 62.2     | 7.47     |
| A4V4J0    | Shibire, isoform C OS=Drosophila melanogaster GN=shi PE=3 SV=1 - [A4V4J0_DROME]                                                             | 17.47 | 5.66     | 7          | 4                 | 4          | 6      | 4.069E7 | 830   | 93.0     | 8.24     |
| Q9VW68    | CG7433, isoform A OS=Drosophila melanogaster GN=CG7433 PE=3 SV=1 - [Q9VW68_DROME]                                                           | 17.32 | 15.43    | 1          | 6                 | 6          | 9      | 1.618E8 | 486   | 54.6     | 8.62     |
| Q9VWA1    | Clathrin light chain OS=Drosophila melanogaster GN=Clc PE=2 SV=1 - [CLC_DROME]                                                              | 17.18 | 25.11    | 1          | 5                 | 5          | 7      | 6.039E7 | 219   | 23.8     | 4.78     |
| Q81QZ8    | CG8649-PC, isoform C OS=Drosophila melanogaster GN=Fim PE=2 SV=1 - [Q81QZ8_DROME]                                                           | 17.16 | 10.55    | 3          | 4                 | 4          | 6      | 2.834E7 | 616   | 69.1     | 5.77     |
| Q9VWT1    | GH22474p OS=Drosophila melanogaster GN=Aats-his PE=2 SV=1 - [Q9VWT1_DROME]                                                                  | 17.15 | 17.43    | 3          | 7                 | 7          | 8      | 6.189E7 | 522   | 57.7     | 6.95     |
| O18333    | GH01619p OS=Drosophila melanogaster GN=Rab2 PE=2 SV=1 - [O18333_DROME]                                                                      | 17.10 | 18.31    | 1          | 3                 | 3          | 6      | 1.653E7 | 213   | 23.5     | 6.39     |
| P47938    | Thioredoxin-1 OS=Drosophila melanogaster GN=dhd PE=1 SV=1 - [THIO1_DROME]                                                                   | 17.10 | 22.43    | 1          | 3                 | 3          | 8      | 2.414E8 | 107   | 12.4     | 9.41     |
| Q7YU05    | Pyruvate dehydrogenase E1 component subunit alpha OS=Drosophila melanogaster GN=(1)G0334 PE=2 SV=1 - [Q7YU05_DROME]                         | 17.08 | 14.63    | 3          | 4                 | 4          | 9      | 9.443E7 | 328   | 35.9     | 6.54     |
| Q9VH07    | RuvB-like helicase 1 OS=Drosophila melanogaster GN=pont PE=1 SV=1 - [RUVB1_DROME]                                                           | 17.08 | 27.63    | 1          | 9                 | 9          | 15     | 3.749E7 | 456   | 50.2     | 7.34     |
| Q9VP57    | CG7752-PA OS=Drosophila melanogaster GN=pzg PE=2 SV=1 - [Q9VP57_DROME]                                                                      | 17.07 | 12.95    | 1          | 7                 | 7          | 9      | 2.843E7 | 996   | 105.0    | 4.89     |
| Q24319    | Dolichyl-diphosphooligosaccharide--protein glycosyltransferase 48 kDa subunit OS=Drosophila melanogaster GN=Ost48 PE=2 SV=2 - [OST48_DROME] | 17.06 | 15.59    | 1          | 4                 | 4          | 9      | 3.819E7 | 449   | 49.9     | 5.59     |
| Q9XZ32    | CG10254, isoform A OS=Drosophila melanogaster GN=CG10254 PE=2 SV=1 - [Q9XZ32_DROME]                                                         | 17.06 | 5.58     | 1          | 5                 | 5          | 7      | 2.336E7 | 1398  | 156.5    | 5.20     |
| Q9VKY2    | Cullin-associated NEDD8-dissociated protein 1 OS=Drosophila melanogaster GN=Cand1 PE=2 SV=1 - [CAND1_DROME]                                 | 17.02 | 5.85     | 1          | 5                 | 5          | 9      | 2.534E7 | 1248  | 139.3    | 5.87     |
| Q9VKM8    | CG33129, isoform B OS=Drosophila melanogaster GN=CG33129 PE=2 SV=1 - [Q9VKM8_DROME]                                                         | 17.00 | 19.41    | 2          | 4                 | 4          | 11     | 1.674E8 | 237   | 25.8     | 9.74     |
| P48591    | Ribonucleoside-diphosphate reductase large subunit OS=Drosophila melanogaster GN=RnrL PE=1 SV=2 - [RIR1_DROME]                              | 16.93 | 7.27     | 1          | 5                 | 5          | 8      | 3.523E7 | 812   | 91.9     | 7.46     |
| Q810G5    | Coatome subunit gamma OS=Drosophila melanogaster GN=gammaCop PE=2 SV=1 - [COPG_DROME]                                                       | 16.88 | 10.08    | 1          | 6                 | 6          | 13     | 6.410E7 | 883   | 97.6     | 5.67     |
| Q9VBN5    | 60S ribosomal protein L27 OS=Drosophila melanogaster GN=RpL27 PE=1 SV=1 - [Q9VBN5_DROME]                                                    | 16.87 | 29.63    | 1          | 5                 | 5          | 13     | 9.151E8 | 135   | 15.9     | 10.61    |
| P26686    | Serine-arginine protein 55 OS=Drosophila melanogaster GN=B52 PE=1 SV=4 - [SRR55_DROME]                                                      | 16.68 | 17.02    | 1          | 7                 | 7          | 13     | 1.781E8 | 376   | 42.8     | 11.37    |
| Q9VC94    | CG5728 OS=Drosophila melanogaster GN=CG5728 PE=2 SV=2 - [Q9VC94_DROME]                                                                      | 16.60 | 5.17     | 1          | 6                 | 6          | 9      | 2.369E7 | 1430  | 159.7    | 8.56     |
| A1ZB80    | CG5174, isoform A OS=Drosophila melanogaster GN=CG5174-RA PE=2 SV=1 - [A1ZB80_DROME]                                                        | 16.54 | 35.10    | 8          | 5                 | 5          | 13     | 8.269E7 | 208   | 22.5     | 5.33     |
| Q9V597    | 60S ribosomal protein L31 OS=Drosophila melanogaster GN=RpL31 PE=1 SV=1 - [RL31_DROME]                                                      | 16.40 | 38.71    | 1          | 5                 | 5          | 10     | 9.747E8 | 124   | 14.5     | 10.20    |
| Q9VVK7    | Signal recognition particle subunit SRP72 OS=Drosophila melanogaster GN=Srp72 PE=2 SV=1 - [Q9VVK7_DROME]                                    | 16.40 | 14.62    | 1          | 6                 | 6          | 12     | 3.118E7 | 650   | 72.8     | 9.06     |
| Q03334    | 40S ribosomal protein S13 OS=Drosophila melanogaster GN=RpS13 PE=1 SV=3 - [RS13_DROME]                                                      | 16.26 | 35.10    | 1          | 8                 | 8          | 17     | 1.377E9 | 151   | 17.2     | 10.55    |
| Q9VZ11    | CG14996-PB OS=Drosophila melanogaster GN=Chd64 PE=2 SV=2 - [Q9VZ11_DROME]                                                                   | 16.25 | 56.38    | 2          | 8                 | 8          | 13     | 1.858E8 | 188   | 20.6     | 8.43     |
| Q9VWI2    | NAT1 ortholog, isoform A OS=Drosophila melanogaster GN=Nat1 PE=2 SV=1 - [Q9VWI2_DROME]                                                      | 16.19 | 9.33     | 1          | 7                 | 7          | 11     | 8.280E7 | 890   | 103.0    | 7.27     |
| Q7K3W2    | CG8728 OS=Drosophila melanogaster GN=CG8728-RA PE=2 SV=1 - [Q7K3W2_DROME]                                                                   | 16.17 | 11.33    | 1          | 4                 | 4          | 8      | 1.274E7 | 556   | 61.0     | 7.12     |
| Q9VIQ8    | CG10664-PA, isoform A OS=Drosophila melanogaster GN=CoIV PE=2 SV=1 - [Q9VIQ8_DROME]                                                         | 16.14 | 10.99    | 1          | 3                 | 3          | 6      | 2.500E8 | 182   | 20.5     | 8.25     |
| P41092    | 60S ribosomal protein L27a OS=Drosophila melanogaster GN=RpL27A PE=1 SV=2 - [RL27A_DROME]                                                   | 16.13 | 24.16    | 1          | 5                 | 5          | 14     | 5.645E8 | 149   | 17.0     | 10.71    |
| A1Z843    | CG1371 OS=Drosophila melanogaster GN=CG1371 PE=4 SV=1 - [A1Z843_DROME]                                                                      | 16.09 | 8.42     | 1          | 9                 | 9          | 12     | 4.345E7 | 1199  | 130.8    | 7.23     |
| P28750    | Maternal protein exuperantia OS=Drosophila melanogaster GN=exu PE=1 SV=2 - [EXU_DROME]                                                      | 16.08 | 20.11    | 1          | 7                 | 7          | 7      | 1.674E8 | 532   | 57.9     | 9.54     |
| Q7K221    | Glutamate oxaloacetate transaminase 1, isoform A OS=Drosophila melanogaster GN=Got1 PE=2 SV=1 - [Q7K221_DROME]                              | 16.00 | 12.02    | 2          | 4                 | 4          | 8      | 7.487E7 | 416   | 46.1     | 7.53     |
| A1Z877    | LP19846p OS=Drosophila melanogaster GN=Ndg PE=2 SV=1 - [A1Z877_DROME]                                                                       | 15.99 | 7.04     | 2          | 8                 | 8          | 8      | 5.239E7 | 1350  | 149.0    | 4.59     |



| Accession | Description                                                                                                                          | Score | Coverage | # Proteins | # Unique Peptides | # Peptides | # PSMs | Area    | # AAs | MW [kDa] | calc. pI |
|-----------|--------------------------------------------------------------------------------------------------------------------------------------|-------|----------|------------|-------------------|------------|--------|---------|-------|----------|----------|
| Q9VZ53    | Protein translation factor SUI1 homolog OS=Drosophila melanogaster GN=CG17737 PE=1 SV=1 - [SUI1_DROME]                               | 15.95 | 62.73    | 1          | 6                 | 6          | 11     | 5.450E7 | 110   | 12.4     | 7.34     |
| O18373    | Selenide, water dikinase OS=Drosophila melanogaster GN=SelD PE=1 SV=1 - [SPS1_DROME]                                                 | 15.88 | 9.80     | 1          | 4                 | 4          | 10     | 5.352E7 | 398   | 43.4     | 6.93     |
| Q9VJD4    | LD24721p OS=Drosophila melanogaster GN=Sgt PE=2 SV=1 - [Q9VJD4_DROME]                                                                | 15.87 | 24.47    | 1          | 8                 | 8          | 11     | 1.113E8 | 331   | 36.2     | 4.64     |
| M9PD27    | Eukaryotic release factor 1, isoform H OS=Drosophila melanogaster GN=eRF1 PE=4 SV=1 - [M9PD27_DROME]                                 | 15.81 | 17.62    | 3          | 6                 | 6          | 13     | 5.787E7 | 437   | 49.0     | 6.09     |
| Q9VF51    | CG6045 OS=Drosophila melanogaster GN=CG6045-RA PE=2 SV=1 - [Q9VF51_DROME]                                                            | 15.80 | 6.86     | 1          | 6                 | 6          | 8      | 1.595E7 | 1254  | 137.8    | 6.57     |
| E1JJD6    | Twenty-four, isoform F OS=Drosophila melanogaster GN=tyf PE=4 SV=2 - [E1JJD6_DROME]                                                  | 15.71 | 6.66     | 2          | 9                 | 9          | 13     | 4.456E7 | 1667  | 173.6    | 6.70     |
| Q9VNX4    | Delta-1-Pyrroline-5-carboxylate dehydrogenase 1, isoform A OS=Drosophila melanogaster GN=P5CDh1 PE=2 SV=1 - [Q9VNX4_DROME]           | 15.67 | 16.72    | 1          | 7                 | 7          | 12     | 6.607E7 | 574   | 63.6     | 8.22     |
| Q9VS02    | CG9953 OS=Drosophila melanogaster GN=CG9953 PE=4 SV=1 - [Q9VS02_DROME]                                                               | 15.57 | 5.12     | 1          | 2                 | 2          | 7      | 2.022E8 | 508   | 56.8     | 6.60     |
| Q9Y105    | Probable glutamine-tRNA ligase OS=Drosophila melanogaster GN=Aats-gln PE=1 SV=1 - [SYQ_DROME]                                        | 15.56 | 8.10     | 1          | 4                 | 4          | 5      | 2.843E7 | 778   | 87.5     | 7.21     |
| Q9W0H6    | CG9149 OS=Drosophila melanogaster GN=CG9149 PE=3 SV=2 - [Q9W0H6_DROME]                                                               | 15.56 | 15.31    | 1          | 3                 | 3          | 5      | 1.539E7 | 392   | 41.1     | 7.05     |
| P49735    | DNA replication licensing factor Mcm2 OS=Drosophila melanogaster GN=Mcm2 PE=1 SV=1 - [MCM2_DROME]                                    | 15.54 | 9.36     | 1          | 6                 | 6          | 8      | 3.845E7 | 887   | 100.4    | 5.11     |
| P22464    | Annexin B9 OS=Drosophila melanogaster GN=AnxB9 PE=2 SV=2 - [ANXB9_DROME]                                                             | 15.52 | 20.99    | 1          | 6                 | 6          | 10     | 6.580E7 | 324   | 36.0     | 4.88     |
| Q7J3V23   | CG11198, isoform B OS=Drosophila melanogaster GN=ACC PE=2 SV=1 - [Q7J3V23_DROME]                                                     | 15.51 | 4.43     | 3          | 7                 | 7          | 9      | 2.725E7 | 2323  | 261.8    | 6.07     |
| Q8MMC4    | Protein CDV3 homolog OS=Drosophila melanogaster GN=CG3760 PE=1 SV=1 - [CDV3_DROME]                                                   | 15.45 | 39.85    | 1          | 7                 | 7          | 8      | 1.307E8 | 271   | 29.6     | 5.53     |
| Q9VMK3    | CG9050-PA OS=Drosophila melanogaster GN=psd PE=4 SV=2 - [Q9VMK3_DROME]                                                               | 15.41 | 8.66     | 1          | 3                 | 3          | 11     | 9.046E7 | 381   | 40.5     | 4.70     |
| Q00963    | Spectrin beta chain OS=Drosophila melanogaster GN=beta-Spec PE=1 SV=2 - [SPTCB_DROME]                                                | 15.40 | 5.06     | 3          | 8                 | 8          | 9      | 2.962E7 | 2291  | 265.6    | 5.34     |
| Q9VFR0    | Protein BCCIP homolog OS=Drosophila melanogaster GN=CG9286 PE=2 SV=2 - [BCCIP_DROME]                                                 | 15.36 | 17.17    | 1          | 4                 | 4          | 7      | 3.852E7 | 297   | 33.4     | 4.65     |
| Q9V9Q4    | CG1416, isoform A OS=Drosophila melanogaster GN=CG1416 PE=2 SV=2 - [Q9V9Q4_DROME]                                                    | 15.30 | 14.41    | 1          | 4                 | 4          | 6      | 1.010E8 | 354   | 40.1     | 6.57     |
| Q9V438    | Calcium-binding protein 1, isoform A OS=Drosophila melanogaster GN=CaBP1 PE=2 SV=1 - [Q9V438_DROME]                                  | 15.23 | 16.86    | 1          | 6                 | 6          | 13     | 8.038E7 | 433   | 46.7     | 5.69     |
| Q9VU68    | Actin-interacting protein 1 OS=Drosophila melanogaster GN=fIr PE=2 SV=1 - [WDR1_DROME]                                               | 15.17 | 22.70    | 1          | 9                 | 9          | 13     | 3.260E7 | 608   | 66.5     | 6.73     |
| O76922    | Protein aubergine OS=Drosophila melanogaster GN=aub PE=1 SV=1 - [AUB_DROME]                                                          | 15.10 | 10.39    | 1          | 6                 | 6          | 9      | 3.450E7 | 866   | 98.5     | 9.28     |
| Q9VIV8    | CG13084-PA OS=Drosophila melanogaster GN=CG13084 PE=4 SV=1 - [Q9VIV8_DROME]                                                          | 15.07 | 15.86    | 1          | 7                 | 7          | 14     | 6.553E7 | 454   | 51.3     | 6.62     |
| Q9VHS8    | FI20117p1 OS=Drosophila melanogaster GN=eIF4AIII PE=2 SV=1 - [Q9VHS8_DROME]                                                          | 15.03 | 6.27     | 1          | 1                 | 3          | 5      | 5.519E8 | 399   | 45.6     | 6.02     |
| Q9W0E4    | Purromycin sensitive aminopeptidase, isoform A OS=Drosophila melanogaster GN=Psa PE=4 SV=1 - [Q9W0E4_DROME]                          | 14.95 | 12.12    | 3          | 10                | 10         | 14     | 1.093E8 | 866   | 99.3     | 5.30     |
| Q9V3H2    | 26S proteasome non-ATPase regulatory subunit 14 OS=Drosophila melanogaster GN=Rpn11 PE=1 SV=1 - [PSDE_DROME]                         | 14.95 | 24.35    | 1          | 5                 | 5          | 12     | 1.115E8 | 308   | 34.4     | 6.13     |
| P61209    | ADP-ribosylation factor 1 OS=Drosophila melanogaster GN=Arf79F PE=2 SV=2 - [ARF1_DROME]                                              | 14.93 | 14.29    | 1          | 1                 | 2          | 7      | 4.727E7 | 182   | 20.7     | 6.58     |
| P35128    | Ubiquitin-conjugating enzyme E2 N OS=Drosophila melanogaster GN=ben PE=2 SV=1 - [UBE2N_DROME]                                        | 14.93 | 17.88    | 1          | 2                 | 2          | 6      | 7.792E7 | 151   | 17.2     | 5.60     |
| O97418    | CG3621, isoform A OS=Drosophila melanogaster GN=CG3621-RA PE=2 SV=1 - [O97418_DROME]                                                 | 14.91 | 34.95    | 1          | 2                 | 2          | 9      | 8.287E7 | 103   | 11.5     | 7.34     |
| P91928    | MICOS complex subunit Mic60 OS=Drosophila melanogaster GN=CG6455 PE=2 SV=4 - [MIC60_DROME]                                           | 14.87 | 12.99    | 1          | 8                 | 8          | 9      | 5.154E8 | 739   | 82.0     | 8.94     |
| P55828    | 40S ribosomal protein S20 OS=Drosophila melanogaster GN=RpS20 PE=1 SV=1 - [RS20_DROME]                                               | 14.83 | 35.00    | 1          | 5                 | 5          | 17     | 7.201E8 | 120   | 13.5     | 10.33    |
| Q6NN28    | RE21974p OS=Drosophila melanogaster GN=Tm1 PE=2 SV=1 - [Q6NN28_DROME]                                                                | 14.81 | 46.32    | 1          | 1                 | 13         | 15     | 2.686E8 | 285   | 32.7     | 4.74     |
| Q7KN97    | Pyruvate carboxylase OS=Drosophila melanogaster GN=CG1516 PE=2 SV=1 - [Q7KN97_DROME]                                                 | 14.81 | 5.33     | 2          | 6                 | 6          | 7      | 4.022E7 | 1181  | 130.8    | 6.81     |
| Q9V3Z4    | GH11341p OS=Drosophila melanogaster GN=Rpn5 PE=2 SV=1 - [Q9V3Z4_DROME]                                                               | 14.77 | 19.12    | 1          | 7                 | 7          | 12     | 1.751E8 | 502   | 57.7     | 5.80     |
| Q7K4H4    | Bifunctional lysine-specific demethylase and histidyl-hydroxylase NO66 OS=Drosophila melanogaster GN=CG2982 PE=1 SV=1 - [NO66_DROME] | 14.77 | 20.06    | 1          | 8                 | 8          | 9      | 6.935E7 | 653   | 73.1     | 7.84     |
| Q9VWI0    | CG12203-PA OS=Drosophila melanogaster GN=CG12203 PE=2 SV=2 - [Q9VWI0_DROME]                                                          | 14.67 | 16.94    | 1          | 2                 | 2          | 5      | 3.586E7 | 183   | 20.7     | 9.80     |
| Q9V3W9    | DNA repair protein Rad23 OS=Drosophila melanogaster GN=Rad23 PE=2 SV=1 - [Q9V3W9_DROME]                                              | 14.60 | 23.91    | 2          | 5                 | 5          | 9      | 5.883E7 | 414   | 45.8     | 4.67     |
| Q7K5K3    | CG11876, isoform A OS=Drosophila melanogaster GN=CG11876 PE=2 SV=1 - [Q7K5K3_DROME]                                                  | 14.58 | 10.14    | 1          | 3                 | 3          | 11     | 6.147E7 | 365   | 39.3     | 7.80     |
| Q9VCI7    | CG10225 OS=Drosophila melanogaster GN=RanBP3 PE=2 SV=1 - [Q9VCI7_DROME]                                                              | 14.54 | 9.58     | 1          | 3                 | 3          | 6      | 5.839E7 | 449   | 47.5     | 4.59     |
| Q8T4G5    | CG6512-PA, isoform A OS=Drosophila melanogaster GN=CG6512 PE=2 SV=1 - [Q8T4G5_DROME]                                                 | 14.48 | 9.69     | 2          | 5                 | 5          | 7      | 5.430E7 | 826   | 89.6     | 8.95     |
| Q9VYQ9    | LD24662p OS=Drosophila melanogaster GN=Tango4 PE=2 SV=1 - [Q9VYQ9_DROME]                                                             | 14.45 | 6.02     | 1          | 1                 | 2          | 9      | 7.792E7 | 482   | 52.7     | 9.31     |
| Q05783    | High mobility group protein D OS=Drosophila melanogaster GN=HmgD PE=1 SV=1 - [HMGD_DROME]                                            | 14.30 | 30.36    | 1          | 3                 | 4          | 5      | 1.032E8 | 112   | 12.4     | 9.20     |
| Q9VDH8    | Ribosomal protein S30, isoform A OS=Drosophila melanogaster GN=RpS30 PE=1 SV=1 - [Q9VDH8_DROME]                                      | 14.30 | 7.58     | 1          | 1                 | 1          | 7      | 7.336E7 | 132   | 14.6     | 10.05    |
| Q9VNF8    | Sec23, isoform A OS=Drosophila melanogaster GN=Sec23 PE=4 SV=2 - [Q9VNF8_DROME]                                                      | 14.28 | 9.18     | 1          | 4                 | 4          | 6      | 3.917E7 | 773   | 86.7     | 6.79     |
| P36951    | Putative hydroxypyruvate isomerase OS=Drosophila melanogaster GN=Gip PE=1 SV=1 - [HYL_DROME]                                         | 14.22 | 16.29    | 1          | 3                 | 3          | 8      | 4.266E7 | 264   | 29.1     | 6.54     |
| Q9VA83    | Ferritin OS=Drosophila melanogaster GN=Fer2LCH PE=2 SV=1 - [Q9VA83_DROME]                                                            | 14.15 | 18.06    | 1          | 4                 | 4          | 12     | 1.021E8 | 227   | 25.2     | 6.34     |
| Q9VYW4    | CG1703, isoform A OS=Drosophila melanogaster GN=CG1703 PE=2 SV=1 - [Q9VYW4_DROME]                                                    | 14.10 | 6.77     | 1          | 3                 | 3          | 7      | 4.629E7 | 901   | 101.5    | 5.82     |
| Q9VEZ3    | LP04448p OS=Drosophila melanogaster GN=msps PE=1 SV=3 - [Q9VEZ3_DROME]                                                               | 14.08 | 4.46     | 2          | 6                 | 6          | 10     | 6.415E7 | 2042  | 225.8    | 8.06     |
| Q7K0Y1    | Ribosome biogenesis protein BOP1 homolog OS=Drosophila melanogaster GN=CG5033 PE=2 SV=1 - [BOP1_DROME]                               | 14.07 | 10.84    | 1          | 7                 | 7          | 8      | 2.629E7 | 784   | 90.4     | 5.88     |
| Q9V7N5    | V-type proton ATPase subunit C OS=Drosophila melanogaster GN=Vha44 PE=2 SV=5 - [VATC_DROME]                                          | 14.06 | 3.59     | 1          | 3                 | 3          | 6      | 2.782E7 | 836   | 92.3     | 7.56     |
| Q07152    | Inosine-5'-monophosphate dehydrogenase OS=Drosophila melanogaster GN=ras PE=1 SV=1 - [IMDH_DROME]                                    | 14.05 | 23.84    | 1          | 9                 | 9          | 17     | 4.243E7 | 537   | 57.8     | 7.43     |

| Accession | Description                                                                                                                         | Score | Coverage | # Proteins | # Unique Peptides | # Peptides | # PSMs | Area    | # AAs | MW [kDa] | calc. pI |
|-----------|-------------------------------------------------------------------------------------------------------------------------------------|-------|----------|------------|-------------------|------------|--------|---------|-------|----------|----------|
| Q9VVA6    | Nuclear migration protein NudC OS=Drosophila melanogaster GN=nudC PE=2 SV=2 - [Q9VVA6_DROME]                                        | 14.03 | 22.89    | 1          | 8                 | 8          | 12     | 4.539E8 | 332   | 37.8     | 5.64     |
| P21914    | Succinate dehydrogenase [ubiquinone] iron-sulfur subunit, mitochondrial OS=Drosophila melanogaster GN=SdhB PE=2 SV=2 - [SDHB_DROME] | 13.94 | 23.57    | 2          | 5                 | 5          | 9      | 2.572E7 | 297   | 33.7     | 8.66     |
| M9PIS3    | 6-phosphogluconate dehydrogenase, decarboxylating OS=Drosophila melanogaster GN=Pgd PE=3 SV=1 - [M9PIS3_DROME]                      | 13.84 | 12.27    | 2          | 5                 | 5          | 8      | 1.009E8 | 481   | 52.5     | 6.32     |
| Q7K0D8    | CG2158 OS=Drosophila melanogaster GN=Nup50 PE=2 SV=1 - [Q7K0D8_DROME]                                                               | 13.81 | 13.83    | 1          | 6                 | 6          | 7      | 3.137E7 | 564   | 59.4     | 8.43     |
| Q9W5E4    | FI21448p1 OS=Drosophila melanogaster GN=l(1)1Bi PE=2 SV=1 - [Q9W5E4_DROME]                                                          | 13.76 | 5.30     | 1          | 4                 | 4          | 6      | 1.663E7 | 1133  | 127.8    | 7.55     |
| Q9VRL1    | CG10640-PA, isoform A OS=Drosophila melanogaster GN=Uev1A PE=2 SV=1 - [Q9VRL1_DROME]                                                | 13.73 | 28.28    | 2          | 3                 | 3          | 6      | 3.242E8 | 145   | 16.7     | 6.14     |
| Q9VVG1    | CG14207, isoform D OS=Drosophila melanogaster GN=HspB8 PE=2 SV=1 - [Q9VVG1_DROME]                                                   | 13.69 | 48.63    | 3          | 5                 | 5          | 7      | 3.184E7 | 183   | 20.8     | 5.94     |
| C1C3E7    | MIP09364p OS=Drosophila melanogaster GN=Zasp52 PE=2 SV=1 - [C1C3E7_DROME]                                                           | 13.67 | 16.26    | 2          | 3                 | 3          | 7      | 3.557E7 | 449   | 48.8     | 8.79     |
| Q9W0L7    | CG32479, isoform A OS=Drosophila melanogaster GN=CG13903 PE=2 SV=2 - [Q9W0L7_DROME]                                                 | 13.67 | 3.30     | 2          | 4                 | 4          | 6      | 1.678E7 | 1517  | 164.6    | 7.28     |
| P23696    | Serine/threonine-protein phosphatase PP2A OS=Drosophila melanogaster GN=mts PE=2 SV=1 - [PP2A_DROME]                                | 13.45 | 18.45    | 1          | 3                 | 3          | 7      | 1.027E7 | 309   | 35.4     | 5.34     |
| P54611    | V-type proton ATPase subunit E OS=Drosophila melanogaster GN=Vha26 PE=2 SV=1 - [VATE_DROME]                                         | 13.39 | 26.99    | 1          | 6                 | 6          | 11     | 1.722E8 | 226   | 26.1     | 6.15     |
| P18489    | Synaptobrevin OS=Drosophila melanogaster GN=Syb PE=2 SV=3 - [SYB_DROME]                                                             | 13.35 | 17.11    | 1          | 2                 | 2          | 5      | 1.819E7 | 152   | 16.7     | 6.57     |
| Q09332    | UDP-glucose:glycoprotein glucosyltransferase OS=Drosophila melanogaster GN=Ugt PE=1 SV=2 - [UGGG_DROME]                             | 13.35 | 6.91     | 1          | 7                 | 7          | 9      | 3.565E7 | 1548  | 174.2    | 6.15     |
| Q81PP8    | CG31548 OS=Drosophila melanogaster GN=CG31548 PE=3 SV=1 - [Q81PP8_DROME]                                                            | 13.32 | 25.78    | 1          | 4                 | 4          | 6      | 4.331E7 | 256   | 27.1     | 8.72     |
| Q7K485    | CathD OS=Drosophila melanogaster GN=cathD PE=2 SV=1 - [Q7K485_DROME]                                                                | 13.29 | 20.15    | 1          | 6                 | 6          | 11     | 1.505E8 | 392   | 42.4     | 6.32     |
| Q9VJD1    | CG6453, isoform A OS=Drosophila melanogaster GN=CG6453 PE=2 SV=1 - [Q9VJD1_DROME]                                                   | 13.27 | 13.50    | 1          | 4                 | 4          | 11     | 5.063E7 | 548   | 61.5     | 4.46     |
| Q7JVI3    | Eukaryotic translation initiation factor 3 subunit M OS=Drosophila melanogaster GN=Tango7 PE=2 SV=1 - [EIF3M_DROME]                 | 13.26 | 13.70    | 1          | 5                 | 5          | 9      | 8.953E7 | 387   | 44.1     | 5.71     |
| Q9VYV4    | Amun, isoform A OS=Drosophila melanogaster GN=Amun PE=2 SV=1 - [Q9VYV4_DROME]                                                       | 13.17 | 11.64    | 1          | 4                 | 4          | 7      | 6.804E7 | 550   | 58.4     | 4.58     |
| M9PET0    | Glycerol 3 phosphate dehydrogenase, isoform E OS=Drosophila melanogaster GN=Gpdh PE=3 SV=1 - [M9PET0_DROME]                         | 13.16 | 12.00    | 4          | 3                 | 3          | 8      | 2.401E7 | 350   | 38.2     | 6.61     |
| X2JA14    | Minichromosome maintenance 3, isoform B OS=Drosophila melanogaster GN=Mcm3 PE=3 SV=1 - [X2JA14_DROME]                               | 13.16 | 10.88    | 2          | 7                 | 7          | 7      | 6.516E7 | 818   | 90.7     | 6.33     |
| Q9V411    | Probable nucleolar GTP-binding protein 1 OS=Drosophila melanogaster GN=CG8801 PE=2 SV=1 - [NOG1_DROME]                              | 13.14 | 5.83     | 1          | 4                 | 4          | 8      | 1.466E7 | 652   | 75.3     | 9.54     |
| Q9VXQ0    | CG8288-PA OS=Drosophila melanogaster GN=mRpl3 PE=4 SV=2 - [Q9VXQ0_DROME]                                                            | 13.13 | 17.40    | 1          | 4                 | 4          | 7      | 1.215E7 | 362   | 40.5     | 10.07    |
| Q9VZU4    | CG12079-PA OS=Drosophila melanogaster GN=NDUFS3 PE=2 SV=1 - [Q9VZU4_DROME]                                                          | 13.07 | 26.42    | 1          | 6                 | 6          | 10     | 3.897E7 | 265   | 30.0     | 7.84     |
| Q7KN90    | Cysteine--tRNA ligase, cytoplasmic OS=Drosophila melanogaster GN=Aats-cys PE=1 SV=1 - [SYCC_DROME]                                  | 12.99 | 6.21     | 2          | 4                 | 4          | 6      | 1.027E7 | 741   | 84.2     | 6.30     |
| Q81FW6    | DEK protein OS=Drosophila melanogaster GN=Dek PE=2 SV=1 - [Q81FW6_DROME]                                                            | 12.93 | 10.78    | 4          | 4                 | 4          | 4      | 4.027E7 | 612   | 65.9     | 4.83     |
| Q9VCA5    | Probable phenylalanine--tRNA ligase beta subunit OS=Drosophila melanogaster GN=CG5706 PE=2 SV=1 - [SYFB_DROME]                      | 12.88 | 7.64     | 1          | 5                 | 5          | 10     | 2.209E7 | 589   | 65.7     | 6.04     |
| Q9VKZ8    | Ubiquitin carboxyl-terminal hydrolase OS=Drosophila melanogaster GN=CG5384 PE=2 SV=1 - [Q9VKZ8_DROME]                               | 12.84 | 16.21    | 1          | 7                 | 7          | 9      | 6.420E7 | 475   | 53.7     | 6.25     |
| Q9VB96    | CG31075 OS=Drosophila melanogaster GN=CG31075 PE=3 SV=2 - [Q9VB96_DROME]                                                            | 12.84 | 10.72    | 1          | 3                 | 3          | 5      | 1.497E7 | 485   | 52.6     | 6.67     |
| Q9VTE5    | Probable prefoldin subunit 2 OS=Drosophila melanogaster GN=l(3)01239 PE=2 SV=1 - [PFD2_DROME]                                       | 12.81 | 36.36    | 1          | 5                 | 5          | 8      | 6.179E7 | 143   | 16.2     | 5.64     |
| Q24117    | Dynein light chain 1, cytoplasmic OS=Drosophila melanogaster GN=ctp PE=1 SV=1 - [DYL1_DROME]                                        | 12.78 | 32.58    | 2          | 2                 | 2          | 8      | 2.358E7 | 89    | 10.4     | 7.37     |
| A4V193    | Poly U binding factor 68kD, isoform D OS=Drosophila melanogaster GN=pUf68 PE=4 SV=1 - [A4V193_DROME]                                | 12.77 | 17.80    | 2          | 4                 | 4          | 6      | 3.436E7 | 545   | 58.0     | 5.30     |
| Q9VXW3    | CG12608 OS=Drosophila melanogaster GN=CG12608 PE=2 SV=2 - [Q9VXW3_DROME]                                                            | 12.57 | 9.71     | 2          | 3                 | 3          | 4      | 1.062E7 | 443   | 49.1     | 8.03     |
| Q9VUJ1    | Proteasome subunit beta type OS=Drosophila melanogaster GN=Prosbeta2 PE=2 SV=1 - [Q9VUJ1_DROME]                                     | 12.54 | 20.59    | 1          | 4                 | 4          | 5      | 1.601E8 | 272   | 29.8     | 8.66     |
| Q9W334    | 40S ribosomal protein S28 OS=Drosophila melanogaster GN=RpS28b PE=1 SV=2 - [RS28_DROME]                                             | 12.50 | 49.23    | 1          | 3                 | 3          | 5      | 3.012E8 | 65    | 7.5      | 10.37    |
| Q9V3I2    | Drab5 OS=Drosophila melanogaster GN=Rab5 PE=2 SV=1 - [Q9V3I2_DROME]                                                                 | 12.46 | 15.53    | 1          | 2                 | 2          | 7      | 2.585E7 | 219   | 23.9     | 8.41     |
| Q9VXN4    | Probable arginine--tRNA ligase, cytoplasmic OS=Drosophila melanogaster GN=Aats-arg PE=2 SV=1 - [SYRC_DROME]                         | 12.45 | 14.59    | 1          | 8                 | 8          | 8      | 3.714E7 | 665   | 75.5     | 7.44     |
| O61345    | Protein penguin OS=Drosophila melanogaster GN=pen PE=2 SV=1 - [PEN_DROME]                                                           | 12.43 | 6.78     | 1          | 4                 | 4          | 5      | 5.404E7 | 737   | 81.3     | 8.94     |
| Q9VK59    | CG5787, isoform A OS=Drosophila melanogaster GN=CG5787 PE=2 SV=2 - [Q9VK59_DROME]                                                   | 12.42 | 11.26    | 1          | 6                 | 6          | 6      | 2.051E7 | 950   | 100.2    | 9.74     |
| Q9VZL1    | LP07226p OS=Drosophila melanogaster GN=mge PE=2 SV=1 - [Q9VZL1_DROME]                                                               | 12.41 | 52.03    | 3          | 4                 | 4          | 6      | 1.489E8 | 148   | 16.1     | 4.60     |
| P25823    | Maternal protein tudor OS=Drosophila melanogaster GN=tud PE=1 SV=2 - [TUD_DROME]                                                    | 12.34 | 1.71     | 1          | 3                 | 3          | 5      | 1.477E7 | 2515  | 285.1    | 6.46     |
| Q0E940    | Eukaryotic translation initiation factor 3 subunit B OS=Drosophila melanogaster GN=eIF3-S9 PE=1 SV=1 - [EIF3B_DROME]                | 12.31 | 8.84     | 1          | 6                 | 6          | 10     | 7.452E7 | 690   | 80.4     | 6.28     |
| P13008    | 40S ribosomal protein S26 OS=Drosophila melanogaster GN=RpS26 PE=1 SV=1 - [RS26_DROME]                                              | 12.30 | 37.72    | 1          | 4                 | 4          | 10     | 8.002E8 | 114   | 13.3     | 11.15    |
| Q7K4Q5    | Probable protein phosphatase CG10417 OS=Drosophila melanogaster GN=CG10417 PE=1 SV=1 - [Y0417_DROME]                                | 12.20 | 5.59     | 1          | 3                 | 3          | 4      | 2.047E7 | 662   | 72.3     | 4.58     |
| Q9VY87    | Cathepsin B1, isoform A OS=Drosophila melanogaster GN=CtsB1 PE=2 SV=1 - [Q9VY87_DROME]                                              | 12.18 | 18.24    | 1          | 5                 | 5          | 9      | 6.193E7 | 340   | 37.4     | 6.61     |
| Q9VXK6    | Eukaryotic translation initiation factor 5 OS=Drosophila melanogaster GN=eIF5 PE=1 SV=1 - [IF5_DROME]                               | 12.15 | 9.27     | 1          | 3                 | 3          | 5      | 7.530E7 | 464   | 51.7     | 5.26     |
| Q9V8R9    | Protein 4.1 homolog OS=Drosophila melanogaster GN=cora PE=1 SV=1 - [41_DROME]                                                       | 11.93 | 4.12     | 1          | 5                 | 5          | 5      | 2.223E7 | 1698  | 184.1    | 8.70     |
| A1Z8P9    | Nucleoprotein TPR OS=Drosophila melanogaster GN=Mtor PE=1 SV=1 - [TPR_DROME]                                                        | 11.92 | 3.71     | 1          | 5                 | 5          | 5      | 2.897E7 | 2346  | 262.2    | 5.10     |
| A1Z8I8    | CG42336, isoform E OS=Drosophila melanogaster GN=CG13211 PE=4 SV=2 - [A1Z8I8_DROME]                                                 | 11.90 | 11.43    | 1          | 1                 | 1          | 4      | 1.983E7 | 140   | 15.6     | 6.33     |
| Q9VHX9    | CD98 heavy chain OS=Drosophila melanogaster GN=CD98hc PE=2 SV=1 - [Q9VHX9_DROME]                                                    | 11.87 | 5.49     | 1          | 2                 | 2          | 5      | 1.012E8 | 565   | 62.6     | 5.69     |
| Q9VD58    | CG6439, isoform A OS=Drosophila melanogaster GN=CG6439 PE=2 SV=1 - [Q9VD58_DROME]                                                   | 11.83 | 18.92    | 1          | 4                 | 4          | 10     | 4.708E7 | 370   | 40.4     | 8.54     |

| Accession | Description                                                                                                                                     | Score | Coverage | # Proteins | # Unique Peptides | # Peptides | # PSMs | Area    | # AAs | MW [kDa] | calc. pI |
|-----------|-------------------------------------------------------------------------------------------------------------------------------------------------|-------|----------|------------|-------------------|------------|--------|---------|-------|----------|----------|
| P62152    | Calmodulin OS=Drosophila melanogaster GN=Cam PE=1 SV=2 - [CALM_DROME]                                                                           | 11.82 | 18.79    | 1          | 2                 | 2          | 4      | 6.733E7 | 149   | 16.8     | 4.22     |
| Q9V426    | LD07162p OS=Drosophila melanogaster GN=vig PE=2 SV=1 - [Q9V426_DROME]                                                                           | 11.80 | 16.73    | 1          | 5                 | 5          | 6      | 2.443E7 | 490   | 52.7     | 9.74     |
| Q9VG16    | Granny smith, isoform D OS=Drosophila melanogaster GN=grsm PE=4 SV=3 - [Q9VG16_DROME]                                                           | 11.78 | 12.95    | 2          | 6                 | 6          | 8      | 9.754E7 | 533   | 57.2     | 6.21     |
| Q9V436    | 26S proteasome regulatory complex subunit p30 OS=Drosophila melanogaster GN=Rpn12 PE=2 SV=1 - [Q9V436_DROME]                                    | 11.74 | 10.98    | 1          | 2                 | 2          | 5      | 1.677E7 | 264   | 30.2     | 6.06     |
| P91926    | AP-2 complex subunit alpha OS=Drosophila melanogaster GN=AP-2alpha PE=1 SV=1 - [AP2A_DROME]                                                     | 11.69 | 7.55     | 1          | 5                 | 5          | 6      | 3.429E7 | 940   | 105.6    | 7.18     |
| A1ZB71    | Glutathione S transferase E6 OS=Drosophila melanogaster GN=GstE6 PE=3 SV=1 - [A1ZB71_DROME]                                                     | 11.64 | 20.72    | 1          | 4                 | 4          | 6      | 1.563E8 | 222   | 25.0     | 6.23     |
| Q9VVK7    | CG9172, isoform A OS=Drosophila melanogaster GN=CG9172 PE=2 SV=1 - [Q9VVK7_DROME]                                                               | 11.63 | 8.60     | 2          | 2                 | 2          | 5      | 9.270E6 | 221   | 24.6     | 9.74     |
| O15971    | CG17060-PA OS=Drosophila melanogaster GN=Rab10 PE=2 SV=1 - [O15971_DROME]                                                                       | 11.61 | 16.67    | 22         | 1                 | 3          | 6      | 3.530E7 | 204   | 23.3     | 8.05     |
| Q9V3P3    | LD45860p OS=Drosophila melanogaster GN=REG PE=2 SV=1 - [Q9V3P3_DROME]                                                                           | 11.56 | 28.57    | 1          | 6                 | 6          | 9      | 5.872E7 | 245   | 28.1     | 6.05     |
| Q9GQR5    | RH02809p OS=Drosophila melanogaster GN=stai PE=2 SV=1 - [Q9GQR5_DROME]                                                                          | 11.53 | 18.29    | 4          | 5                 | 5          | 6      | 5.180E7 | 257   | 29.6     | 8.25     |
| Q8SWU7    | Obg-like ATPase 1 OS=Drosophila melanogaster GN=CG1354 PE=1 SV=1 - [OLA1_DROME]                                                                 | 11.52 | 8.82     | 1          | 4                 | 4          | 7      | 2.951E8 | 397   | 44.9     | 6.71     |
| E1JIK9    | Myofillin, isoform I OS=Drosophila melanogaster GN=Mf PE=4 SV=1 - [E1JIK9_DROME]                                                                | 11.46 | 16.09    | 8          | 3                 | 3          | 7      | 5.407E7 | 230   | 26.6     | 9.44     |
| P20432    | Glutathione S-transferase 1-1 OS=Drosophila melanogaster GN=GstD1 PE=1 SV=1 - [GSTT1_DROME]                                                     | 11.45 | 25.84    | 6          | 7                 | 8          | 9      | 5.148E8 | 209   | 23.9     | 7.23     |
| Q9VEP3    | CG4009 OS=Drosophila melanogaster GN=CG4009 PE=4 SV=1 - [Q9VEP3_DROME]                                                                          | 11.39 | 14.77    | 1          | 7                 | 7          | 7      | 5.454E7 | 233   | 70.7     | 8.02     |
| Q9VQ29    | Cytochrome b-c1 complex subunit Rieske, mitochondrial OS=Drosophila melanogaster GN=RfESP PE=2 SV=3 - [Q9VQ29_DROME]                            | 11.38 | 10.87    | 1          | 2                 | 2          | 5      | 2.716E8 | 230   | 24.9     | 8.68     |
| Q9VSU6    | Dihydropteridine reductase OS=Drosophila melanogaster GN=Dhpr PE=2 SV=1 - [Q9VSU6_DROME]                                                        | 11.37 | 16.60    | 1          | 3                 | 3          | 4      | 3.785E7 | 235   | 24.5     | 6.34     |
| Q8STG9    | DSec61alpha OS=Drosophila melanogaster GN=Sec61alpha PE=2 SV=1 - [Q8STG9_DROME]                                                                 | 11.36 | 7.77     | 1          | 4                 | 4          | 7      | 3.545E8 | 476   | 52.2     | 8.24     |
| Q9VTF9    | Ubiquitin fusion degradation protein 1 homolog OS=Drosophila melanogaster GN=Ufd1-like PE=2 SV=1 - [UFD1_DROME]                                 | 11.32 | 12.66    | 1          | 2                 | 2          | 4      | 2.856E7 | 316   | 34.8     | 6.25     |
| M9PD65    | Ran GTPase activating protein, isoform C OS=Drosophila melanogaster GN=RanGAP PE=4 SV=1 - [M9PD65_DROME]                                        | 11.29 | 12.07    | 2          | 5                 | 5          | 8      | 4.609E7 | 588   | 65.1     | 4.65     |
| Q9VIK1    | CG9318, isoform A OS=Drosophila melanogaster GN=CG9318 PE=2 SV=1 - [Q9VIK1_DROME]                                                               | 11.27 | 5.77     | 1          | 2                 | 2          | 6      | 4.382E7 | 659   | 74.6     | 7.77     |
| Q9V3V9    | Endonuclease G inhibitor, isoform A OS=Drosophila melanogaster GN=EndoGI PE=1 SV=1 - [Q9V3V9_DROME]                                             | 11.26 | 12.81    | 1          | 3                 | 3          | 6      | 1.867E7 | 359   | 40.6     | 4.60     |
| Q7JWF1    | CG12140 OS=Drosophila melanogaster GN=Elf-QO PE=2 SV=1 - [Q7JWF1_DROME]                                                                         | 11.19 | 11.09    | 1          | 5                 | 5          | 9      | 2.461E7 | 604   | 65.9     | 6.64     |
| Q9W2D9    | Eukaryotic translation initiation factor 3 subunit K OS=Drosophila melanogaster GN=CG10306 PE=2 SV=1 - [EIF3K_DROME]                            | 11.17 | 19.37    | 1          | 3                 | 3          | 7      | 1.669E8 | 222   | 25.6     | 6.43     |
| Q24276    | Hsp90 co-chaperone Cdc37 OS=Drosophila melanogaster GN=Cdc37 PE=1 SV=1 - [CDC37_DROME]                                                          | 11.10 | 15.42    | 1          | 4                 | 4          | 6      | 3.325E7 | 389   | 45.1     | 5.06     |
| Q9XZ63    | Mesencephalic astrocyte-derived neurotrophic factor homolog OS=Drosophila melanogaster GN=Manf PE=1 SV=2 - [ARMET_DROME]                        | 11.07 | 8.67     | 1          | 1                 | 1          | 6      | 1.525E7 | 173   | 20.1     | 8.24     |
| Q9VSC5    | CG8209 OS=Drosophila melanogaster GN=CG8209 PE=2 SV=1 - [Q9VSC5_DROME]                                                                          | 11.07 | 11.48    | 1          | 2                 | 2          | 4      | 1.782E7 | 331   | 36.7     | 6.10     |
| Q9VGP4    | LP08082p OS=Drosophila melanogaster GN=Ranbp9 PE=2 SV=1 - [Q9VGP4_DROME]                                                                        | 11.05 | 4.52     | 1          | 4                 | 4          | 6      | 2.231E7 | 1018  | 114.3    | 4.87     |
| Q9VAM6    | CDGSH iron-sulfur domain-containing protein 2 homolog OS=Drosophila melanogaster GN=CG1458 PE=2 SV=1 - [CISD2_DROME]                            | 11.02 | 35.34    | 1          | 5                 | 5          | 8      | 8.670E7 | 133   | 14.6     | 8.46     |
| Q02645    | Protein hu-li tai shao OS=Drosophila melanogaster GN=hts PE=1 SV=2 - [HTS_DROME]                                                                | 11.02 | 7.09     | 1          | 6                 | 6          | 8      | 3.058E7 | 1156  | 127.9    | 6.39     |
| Q7K581    | CG8963, isoform A OS=Drosophila melanogaster GN=CG8963 PE=2 SV=1 - [Q7K581_DROME]                                                               | 11.00 | 10.55    | 1          | 4                 | 4          | 5      | 5.957E7 | 559   | 63.2     | 6.23     |
| Q04448    | Bifunctional methylenetetrahydrofolate dehydrogenase/cyclohydrolase, mitochondrial OS=Drosophila melanogaster GN=Nmdmc PE=2 SV=2 - [MTDC_DROME] | 11.00 | 10.36    | 1          | 2                 | 2          | 4      | 3.067E7 | 309   | 33.5     | 7.52     |
| Q8INH5    | CG32473, isoform B OS=Drosophila melanogaster GN=CG32473-RB PE=2 SV=1 - [Q8INH5_DROME]                                                          | 11.00 | 6.76     | 4          | 5                 | 5          | 8      | 1.120E8 | 903   | 102.6    | 5.12     |
| Q9VSS1    | Pixie, isoform A OS=Drosophila melanogaster GN=pix PE=2 SV=1 - [Q9VSS1_DROME]                                                                   | 10.97 | 5.89     | 1          | 4                 | 4          | 4      | 4.385E7 | 611   | 69.3     | 8.13     |
| P45437    | Coatomeer subunit beta OS=Drosophila melanogaster GN=betaCop PE=2 SV=2 - [COPB_DROME]                                                           | 10.94 | 7.05     | 1          | 4                 | 4          | 6      | 2.545E7 | 964   | 107.3    | 6.32     |
| Q9VG69    | CG5844 OS=Drosophila melanogaster GN=CG5844 PE=2 SV=1 - [Q9VG69_DROME]                                                                          | 10.84 | 13.23    | 1          | 3                 | 3          | 4      | 7.102E7 | 378   | 41.6     | 5.68     |
| Q26454    | DNA replication licensing factor MCM4 OS=Drosophila melanogaster GN=dpa PE=1 SV=2 - [MCM4_DROME]                                                | 10.77 | 13.16    | 1          | 7                 | 7          | 9      | 4.091E7 | 866   | 96.5     | 7.52     |
| O62621    | Coatomeer subunit beta' OS=Drosophila melanogaster GN=beta'Cop PE=2 SV=2 - [COPB2_DROME]                                                        | 10.76 | 4.27     | 1          | 3                 | 3          | 6      | 4.194E7 | 914   | 102.6    | 5.26     |
| Q9VJC7    | Elongation factor Ts, mitochondrial OS=Drosophila melanogaster GN=CG6412 PE=2 SV=1 - [EFTS_DROME]                                               | 10.74 | 13.21    | 1          | 3                 | 3          | 4      | 4.019E7 | 318   | 35.4     | 6.87     |
| P43332    | U1 small nuclear ribonucleoprotein A OS=Drosophila melanogaster GN=snf PE=1 SV=1 - [SNRPA_DROME]                                                | 10.71 | 10.19    | 1          | 3                 | 3          | 5      | 2.669E7 | 216   | 24.5     | 9.64     |
| P02299    | Histone H3 OS=Drosophila melanogaster GN=His3 PE=1 SV=4 - [H3_DROME]                                                                            | 10.68 | 16.91    | 2          | 3                 | 3          | 5      | 1.275E9 | 136   | 15.4     | 11.27    |
| Q9VJZ6    | CG6523-PA OS=Drosophila melanogaster GN=CG6523 PE=2 SV=1 - [Q9VJZ6_DROME]                                                                       | 10.67 | 14.81    | 1          | 2                 | 2          | 5      | 2.458E7 | 216   | 23.6     | 4.86     |
| Q9VZQ8    | Glutathione peroxidase OS=Drosophila melanogaster GN=PHGPx PE=2 SV=1 - [Q9VZQ8_DROME]                                                           | 10.56 | 18.93    | 3          | 3                 | 3          | 6      | 5.064E7 | 169   | 18.7     | 7.83     |
| Q9V6U9    | Probable trans-2-enoyl-CoA reductase, mitochondrial OS=Drosophila melanogaster GN=CG16935 PE=3 SV=2 - [MECR_DROME]                              | 10.46 | 19.89    | 1          | 6                 | 6          | 10     | 3.707E7 | 357   | 39.1     | 9.11     |
| Q8T0Q4    | GH13992p OS=Drosophila melanogaster GN=shrb PE=2 SV=1 - [Q8T0Q4_DROME]                                                                          | 10.43 | 12.39    | 1          | 2                 | 2          | 4      | 2.603E7 | 226   | 25.4     | 4.81     |
| Q27237    | Protein tumorous imaginal discs, mitochondrial OS=Drosophila melanogaster GN=(2)tid PE=1 SV=2 - [TID_DROME]                                     | 10.34 | 14.42    | 2          | 4                 | 4          | 5      | 1.285E8 | 520   | 56.1     | 9.10     |
| Q9NHDS    | Probable N-acetyltransferase san OS=Drosophila melanogaster GN=san PE=1 SV=1 - [SAN_DROME]                                                      | 10.28 | 18.48    | 1          | 3                 | 3          | 5      | 2.572E7 | 184   | 21.0     | 8.78     |
| P91929    | NADH dehydrogenase [ubiquinone] 1 alpha subcomplex subunit 10, mitochondrial OS=Drosophila melanogaster GN=ND42 PE=2 SV=2 - [NDUAA_DROME]       | 10.26 | 4.42     | 1          | 2                 | 2          | 6      | 1.364E7 | 407   | 46.9     | 6.80     |
| Q9W022    | CG8993-PA OS=Drosophila melanogaster GN=CG8993 PE=2 SV=1 - [Q9W022_DROME]                                                                       | 10.25 | 16.20    | 1          | 2                 | 2          | 4      | 8.770E7 | 142   | 15.8     | 8.46     |
| P40945    | ADP-ribosylation factor 2 OS=Drosophila melanogaster GN=Arf102F PE=2 SV=2 - [ARF2_DROME]                                                        | 10.24 | 17.78    | 1          | 3                 | 4          | 6      | 3.301E7 | 180   | 20.6     | 7.39     |
| P23226    | 205 kDa microtubule-associated protein OS=Drosophila melanogaster GN=Map205 PE=1 SV=2 - [MA205_DROME]                                           | 10.23 | 5.49     | 2          | 4                 | 4          | 4      | 4.668E7 | 1185  | 126.6    | 4.86     |

| Accession | Description                                                                                                                 | Score | Coverage | # Proteins | # Unique Peptides | # Peptides | # PSMs | Area    | # AAs | MW [kDa] | calc. pI |
|-----------|-----------------------------------------------------------------------------------------------------------------------------|-------|----------|------------|-------------------|------------|--------|---------|-------|----------|----------|
| Q9VXF9    | AT13091p OS=Drosophila melanogaster GN=rngo PE=2 SV=1 - [Q9VXF9_DROME]                                                      | 10.22 | 12.23    | 1          | 4                 | 4          | 4      | 8.695E6 | 458   | 50.5     | 5.16     |
| Q9VDT5    | Carboxypeptidase OS=Drosophila melanogaster GN=CG4572-RC PE=2 SV=1 - [Q9VDT5_DROME]                                         | 10.19 | 11.00    | 1          | 4                 | 4          | 8      | 1.571E7 | 482   | 54.4     | 6.42     |
| Q03427    | Lamin-C OS=Drosophila melanogaster GN=LamC PE=1 SV=2 - [LAMC_DROME]                                                         | 10.16 | 10.14    | 1          | 5                 | 5          | 5      | 1.945E8 | 621   | 69.8     | 6.84     |
| A4V336    | Heterogeneous nuclear ribonucleoprotein at 98DE, isoform F OS=Drosophila melanogaster GN=Hrb98DE PE=4 SV=1 - [A4V336_DROME] | 10.13 | 13.02    | 2          | 3                 | 3          | 4      | 1.181E8 | 361   | 38.5     | 9.16     |
| P48148    | Ras-like GTP-binding protein Rho1 OS=Drosophila melanogaster GN=Rho1 PE=1 SV=1 - [RHO1_DROME]                               | 10.11 | 18.23    | 1          | 3                 | 3          | 5      | 7.430E7 | 192   | 21.7     | 7.01     |
| Q8T079    | Putative oxidoreductase GLYR1 homolog OS=Drosophila melanogaster GN=CG4747 PE=1 SV=1 - [GLYR1_DROME]                        | 10.11 | 13.79    | 2          | 6                 | 6          | 6      | 3.622E7 | 602   | 65.2     | 6.10     |
| Q04047    | Protein no-on-transient A OS=Drosophila melanogaster GN=nonA PE=1 SV=2 - [NONA_DROME]                                       | 10.01 | 7.86     | 2          | 3                 | 3          | 4      | 1.912E7 | 700   | 76.9     | 9.35     |
| Q0E8V7    | CG34132 OS=Drosophila melanogaster GN=Tim13 PE=2 SV=1 - [Q0E8V7_DROME]                                                      | 10.01 | 19.05    | 1          | 2                 | 2          | 4      | 7.491E7 | 84    | 9.7      | 8.16     |
| A8DYH2    | Ubiquitin-fold modifier 1 OS=Drosophila melanogaster GN=CG34191 PE=3 SV=1 - [UFM1_DROME]                                    | 10.01 | 31.03    | 1          | 2                 | 2          | 6      | 3.057E7 | 87    | 9.4      | 8.54     |
| Q9V3J4    | Sec13 OS=Drosophila melanogaster GN=Sec13 PE=4 SV=1 - [Q9V3J4_DROME]                                                        | 10.00 | 9.55     | 1          | 3                 | 3          | 6      | 4.727E7 | 356   | 39.5     | 6.25     |
| A1Z909    | CG8545 OS=Drosophila melanogaster GN=CG8545-RA PE=2 SV=1 - [A1Z909_DROME]                                                   | 9.97  | 9.99     | 1          | 6                 | 6          | 8      | 3.910E7 | 891   | 99.8     | 5.50     |
| Q7KLX3    | GM12291p OS=Drosophila melanogaster GN=Tapdelta PE=2 SV=1 - [Q7KLX3_DROME]                                                  | 9.92  | 24.10    | 1          | 4                 | 4          | 9      | 5.535E7 | 166   | 17.6     | 8.54     |
| Q81M18    | Myosin light chain 2, isoform B OS=Drosophila melanogaster GN=Mlc2 PE=4 SV=2 - [Q81M18_DROME]                               | 9.89  | 31.34    | 2          | 3                 | 3          | 9      | 7.278E7 | 201   | 21.5     | 4.74     |
| Q7PLL6    | CG17514, isoform A OS=Drosophila melanogaster GN=CG17514 PE=4 SV=2 - [Q7PLL6_DROME]                                         | 9.89  | 4.79     | 1          | 9                 | 9          | 10     | 7.262E7 | 2630  | 293.7    | 7.03     |
| Q9VX36    | CG5703, isoform A OS=Drosophila melanogaster GN=CG5703 PE=4 SV=1 - [Q9VX36_DROME]                                           | 9.87  | 36.36    | 1          | 8                 | 8          | 13     | 8.930E7 | 242   | 26.8     | 6.90     |
| Q59DP8    | Calcium-transporting ATPase OS=Drosophila melanogaster GN=PMCA PE=3 SV=3 - [Q59DP8_DROME]                                   | 9.87  | 4.91     | 7          | 3                 | 3          | 3      | 2.965E7 | 1120  | 123.3    | 6.70     |
| Q24253    | Adaptor protein complex 1/2, beta subunit OS=Drosophila melanogaster GN=AP-1-2beta PE=2 SV=1 - [Q24253_DROME]               | 9.84  | 4.99     | 1          | 3                 | 3          | 7      | 3.694E7 | 921   | 101.1    | 5.11     |
| Q9VJG2    | CG12288 OS=Drosophila melanogaster GN=CG12288 PE=4 SV=1 - [Q9VJG2_DROME]                                                    | 9.83  | 6.21     | 1          | 2                 | 2          | 4      | 2.825E7 | 435   | 47.9     | 10.04    |
| Q9VPY2    | Phospholipase A2 activator protein, isoform A OS=Drosophila melanogaster GN=Plap PE=2 SV=1 - [Q9VPY2_DROME]                 | 9.82  | 4.96     | 1          | 3                 | 3          | 5      | 2.694E7 | 787   | 85.7     | 5.83     |
| Q9VEP6    | Adenylosuccinate lyase OS=Drosophila melanogaster GN=AdSL PE=2 SV=1 - [Q9VEP6_DROME]                                        | 9.79  | 10.19    | 1          | 3                 | 3          | 6      | 6.405E7 | 481   | 53.8     | 7.49     |
| Q9W3N7    | CG18624, isoform B OS=Drosophila melanogaster GN=CG18624-RA PE=2 SV=1 - [Q9W3N7_DROME]                                      | 9.72  | 26.79    | 1          | 2                 | 2          | 3      | 3.499E7 | 56    | 6.2      | 9.70     |
| P48810    | Heterogeneous nuclear ribonucleoprotein 87F OS=Drosophila melanogaster GN=Hrb87F PE=2 SV=2 - [RB87F_DROME]                  | 9.71  | 18.96    | 1          | 4                 | 4          | 6      | 1.340E8 | 385   | 39.5     | 9.03     |
| Q9VX77    | CG5010-PA OS=Drosophila melanogaster GN=CG5010 PE=2 SV=1 - [Q9VX77_DROME]                                                   | 9.70  | 7.06     | 1          | 1                 | 1          | 3      | 1.887E8 | 170   | 17.3     | 8.87     |
| Q9XZ61    | Ubiquitin carboxyl-terminal hydrolase OS=Drosophila melanogaster GN=Uch-L5 PE=2 SV=1 - [Q9XZ61_DROME]                       | 9.68  | 15.74    | 1          | 4                 | 4          | 8      | 1.149E8 | 324   | 37.6     | 5.21     |
| Q9VU36    | LP04985p OS=Drosophila melanogaster GN=mRpL20 PE=2 SV=1 - [Q9VU36_DROME]                                                    | 9.62  | 16.00    | 1          | 2                 | 2          | 4      | 2.014E7 | 150   | 17.4     | 10.56    |
| P11450    | Follicle cell protein 3C-1 OS=Drosophila melanogaster GN=Fcp3C PE=2 SV=3 - [FCP3C_DROME]                                    | 9.62  | 5.32     | 1          | 1                 | 1          | 3      | 2.345E7 | 282   | 30.3     | 7.08     |
| Q7K0D3    | CG12909 OS=Drosophila melanogaster GN=CG12909 PE=2 SV=1 - [Q7K0D3_DROME]                                                    | 9.62  | 13.88    | 1          | 3                 | 3          | 9      | 1.856E7 | 281   | 32.1     | 8.95     |
| Q9VGQ1    | CG5214 OS=Drosophila melanogaster GN=CG5214 PE=2 SV=1 - [Q9VGQ1_DROME]                                                      | 9.56  | 12.61    | 1          | 4                 | 4          | 6      | 1.171E8 | 468   | 49.9     | 9.47     |
| Q9W117    | CG5554 OS=Drosophila melanogaster GN=CG5554 PE=2 SV=1 - [Q9W117_DROME]                                                      | 9.55  | 17.34    | 1          | 4                 | 4          | 5      | 4.568E7 | 323   | 36.3     | 4.59     |
| Q9VNA5    | Proteasome subunit beta type-4 OS=Drosophila melanogaster GN=Prosbeta7 PE=2 SV=1 - [PSB4_DROME]                             | 9.50  | 25.37    | 1          | 5                 | 5          | 9      | 7.532E7 | 268   | 30.0     | 6.58     |
| Q9W4M9    | tRNA (cytosine(34)-C(5))-methyltransferase OS=Drosophila melanogaster GN=Nsun2 PE=2 SV=1 - [NSUN2_DROME]                    | 9.47  | 13.27    | 1          | 6                 | 6          | 7      | 1.257E7 | 746   | 84.1     | 6.83     |
| Q9VJG0    | Aminopeptidase P OS=Drosophila melanogaster GN=ApepP PE=2 SV=1 - [Q9VJG0_DROME]                                             | 9.44  | 20.55    | 1          | 6                 | 6          | 8      | 4.572E7 | 613   | 68.5     | 5.95     |
| Q7KMP8    | 265 proteasome regulatory complex subunit p39A OS=Drosophila melanogaster GN=Rpn9 PE=1 SV=1 - [Q7KMP8_DROME]                | 9.39  | 5.24     | 1          | 2                 | 2          | 7      | 4.567E7 | 382   | 43.7     | 5.26     |
| Q9VFP5    | CG9925 OS=Drosophila melanogaster GN=CG9925 PE=2 SV=1 - [Q9VFP5_DROME]                                                      | 9.39  | 7.17     | 1          | 4                 | 4          | 6      | 3.048E7 | 892   | 99.9     | 8.54     |
| Q9VFN9    | CG9922 OS=Drosophila melanogaster GN=CG9922 PE=2 SV=1 - [Q9VFN9_DROME]                                                      | 9.38  | 20.97    | 1          | 1                 | 1          | 3      | 2.468E7 | 124   | 14.0     | 4.74     |
| M9PJQ5    | Wings up A, isoform K OS=Drosophila melanogaster GN=wupA PE=4 SV=1 - [M9PJQ5_DROME]                                         | 9.38  | 21.74    | 6          | 4                 | 4          | 4      | 4.551E7 | 184   | 21.6     | 9.69     |
| Q9W5C2    | Translocating chain-associated membrane protein OS=Drosophila melanogaster GN=TRAM PE=2 SV=1 - [Q9W5C2_DROME]               | 9.37  | 4.35     | 1          | 1                 | 1          | 3      | 1.358E7 | 368   | 41.8     | 9.57     |
| A1ZAK9    | P-element somatic inhibitor, isoform A OS=Drosophila melanogaster GN=Psi PE=4 SV=1 - [A1ZAK9_DROME]                         | 9.36  | 7.40     | 3          | 4                 | 4          | 4      | 2.628E7 | 716   | 73.4     | 7.96     |
| Q8MRW1    | CG40042 OS=Drosophila melanogaster GN=CG40042 PE=2 SV=1 - [Q8MRW1_DROME]                                                    | 9.34  | 27.67    | 1          | 3                 | 3          | 6      | 1.398E7 | 206   | 22.1     | 9.00     |
| Q9V3E7    | Aly OS=Drosophila melanogaster GN=Ref1 PE=2 SV=1 - [Q9V3E7_DROME]                                                           | 9.34  | 15.79    | 1          | 4                 | 4          | 6      | 3.599E7 | 266   | 27.8     | 10.55    |
| Q0KH26    | CG7834, isoform A OS=Drosophila melanogaster GN=CG7834 PE=4 SV=1 - [Q0KH26_DROME]                                           | 9.32  | 20.95    | 1          | 5                 | 5          | 5      | 4.535E7 | 253   | 27.2     | 8.05     |
| Q9V110    | Probable small nuclear ribonucleoprotein Sm D2 OS=Drosophila melanogaster GN=Smd2 PE=1 SV=1 - [SMD2_DROME]                  | 9.27  | 40.34    | 1          | 4                 | 4          | 5      | 1.612E8 | 119   | 13.5     | 9.95     |
| O61613    | Glycylpeptide N-tetradecanoyltransferase OS=Drosophila melanogaster GN=Nmt PE=2 SV=2 - [NMT_DROME]                          | 9.23  | 10.81    | 1          | 4                 | 4          | 7      | 2.799E7 | 472   | 53.8     | 8.44     |
| A8JRB8    | CG5028, isoform C OS=Drosophila melanogaster GN=CG5028-RC PE=2 SV=1 - [A8JRB8_DROME]                                        | 9.20  | 14.54    | 4          | 4                 | 4          | 6      | 2.292E7 | 392   | 43.2     | 6.76     |
| Q9VUY9    | Phosphoglucomutase OS=Drosophila melanogaster GN=Pgm PE=1 SV=1 - [PGM_DROME]                                                | 9.13  | 5.89     | 1          | 3                 | 3          | 4      | 3.173E7 | 560   | 60.7     | 6.70     |
| Q7K110    | CG6370 OS=Drosophila melanogaster GN=OstDelta PE=2 SV=1 - [Q7K110_DROME]                                                    | 9.09  | 13.25    | 1          | 6                 | 6          | 7      | 2.219E7 | 634   | 69.2     | 9.17     |
| Q9VMW4    | Reticulon-like protein OS=Drosophila melanogaster GN=Rtnl1 PE=2 SV=1 - [Q9VMW4_DROME]                                       | 9.06  | 19.82    | 5          | 1                 | 4          | 5      | 2.113E7 | 222   | 24.7     | 9.19     |
| Q8SWS3    | CG13049 OS=Drosophila melanogaster GN=CG13049 PE=2 SV=1 - [Q8SWS3_DROME]                                                    | 9.06  | 28.73    | 1          | 2                 | 2          | 3      | 1.100E7 | 181   | 17.3     | 9.89     |
| P06742    | Myosin light chain alkali OS=Drosophila melanogaster GN=Mlc1 PE=1 SV=4 - [MLC1_DROME]                                       | 9.05  | 8.39     | 1          | 1                 | 1          | 5      | 3.581E7 | 155   | 17.5     | 4.39     |
| O46037    | Vinculin OS=Drosophila melanogaster GN=Vinc PE=1 SV=1 - [VINC_DROME]                                                        | 9.02  | 8.84     | 1          | 5                 | 5          | 6      | 2.680E7 | 961   | 106.2    | 6.70     |



| Accession | Description                                                                                                    | Score | Coverage | # Proteins | # Unique Peptides | # Peptides | # PSMs | Area    | # AAs | MW [kDa] | calc. pI |
|-----------|----------------------------------------------------------------------------------------------------------------|-------|----------|------------|-------------------|------------|--------|---------|-------|----------|----------|
| Q9VRJ4    | CG10672 OS=Drosophila melanogaster GN=CG10672 PE=2 SV=1 - [Q9VRJ4_DROME]                                       | 8.96  | 15.46    | 1          | 4                 | 4          | 6      | 2.177E7 | 317   | 33.6     | 9.33     |
| Q9V3W2    | GM23292p OS=Drosophila melanogaster GN=(2)35Di PE=2 SV=1 - [Q9V3W2_DROME]                                      | 8.88  | 13.17    | 1          | 2                 | 2          | 4      | 9.424E6 | 167   | 19.0     | 9.82     |
| Q24439    | ATP synthase subunit O, mitochondrial OS=Drosophila melanogaster GN=Oscp PE=2 SV=2 - [ATPO_DROME]              | 8.86  | 22.49    | 2          | 4                 | 4          | 6      | 2.534E8 | 209   | 22.4     | 9.63     |
| Q9VEX6    | AAA family protein Bor OS=Drosophila melanogaster GN=bor PE=2 SV=2 - [Q9VEX6_DROME]                            | 8.85  | 13.74    | 1          | 8                 | 8          | 8      | 5.868E7 | 604   | 68.3     | 9.17     |
| Q9VNX8    | Eukaryotic translation initiation factor 2A OS=Drosophila melanogaster GN=CG7414 PE=1 SV=1 - [EIF2A_DROME]     | 8.84  | 6.27     | 1          | 2                 | 2          | 3      | 2.622E7 | 638   | 70.0     | 9.10     |
| Q9VH69    | 40S ribosomal protein S29 OS=Drosophila melanogaster GN=RpS29 PE=1 SV=1 - [RS29_DROME]                         | 8.77  | 30.36    | 1          | 3                 | 3          | 7      | 2.114E8 | 56    | 6.6      | 9.61     |
| Q9VLT7    | CG7424-PA OS=Drosophila melanogaster GN=Rpl36A PE=1 SV=2 - [Q9VLT7_DROME]                                      | 8.76  | 19.23    | 1          | 2                 | 2          | 4      | 3.922E8 | 104   | 12.5     | 10.80    |
| Q9VS57    | RE14391p OS=Drosophila melanogaster GN=Sec63 PE=2 SV=1 - [Q9VS57_DROME]                                        | 8.75  | 8.50     | 1          | 4                 | 4          | 5      | 1.863E7 | 753   | 85.8     | 5.99     |
| Q9V3S9    | Very long-chain-fatty-acid-CoA ligase bubblegum OS=Drosophila melanogaster GN=bgm PE=2 SV=1 - [BGM_DROME]      | 8.71  | 14.71    | 1          | 6                 | 6          | 7      | 2.735E8 | 666   | 73.6     | 8.24     |
| P23380    | V-type proton ATPase 16 kDa proteolipid subunit OS=Drosophila melanogaster GN=Vha16-1 PE=2 SV=1 - [VATL_DROME] | 8.70  | 11.32    | 1          | 1                 | 1          | 4      | 3.144E7 | 159   | 16.3     | 8.40     |
| Q955I7    | CG6028 OS=Drosophila melanogaster GN=CG6028 PE=2 SV=1 - [Q955I7_DROME]                                         | 8.69  | 19.11    | 1          | 3                 | 3          | 5      | 1.053E8 | 293   | 32.3     | 6.57     |
| Q0E8X6    | eIF2B-delta, isoform B OS=Drosophila melanogaster GN=eIF2B-delta PE=3 SV=1 - [Q0E8X6_DROME]                    | 8.69  | 11.63    | 2          | 4                 | 4          | 4      | 2.055E7 | 576   | 61.8     | 9.25     |
| Q8IN02    | BcDNA.LD12153 OS=Drosophila melanogaster GN=Dph5 PE=2 SV=2 - [Q8IN02_DROME]                                    | 8.68  | 5.69     | 1          | 1                 | 1          | 6      | 4.886E7 | 281   | 31.6     | 5.52     |
| A9UN61    | CG13114 OS=Drosophila melanogaster GN=CG13114-RB PE=2 SV=1 - [A9UN61_DROME]                                    | 8.66  | 9.15     | 1          | 3                 | 3          | 4      | 6.380E7 | 426   | 45.9     | 5.74     |
| Q9VEA1    | Eukaryotic initiation factor 1A, isoform A OS=Drosophila melanogaster GN=eIF-1A PE=2 SV=1 - [Q9VEA1_DROME]     | 8.59  | 19.59    | 1          | 3                 | 3          | 5      | 6.353E7 | 148   | 17.1     | 5.22     |
| Q24400    | Muscle LIM protein Mlp84B OS=Drosophila melanogaster GN=Mlp84B PE=1 SV=1 - [MLP2_DROME]                        | 8.56  | 9.29     | 1          | 2                 | 3          | 3      | 2.009E7 | 495   | 53.5     | 8.28     |
| Q9VT61    | CG8108, isoform A OS=Drosophila melanogaster GN=CG8108 PE=2 SV=1 - [Q9VT61_DROME]                              | 8.53  | 8.81     | 1          | 6                 | 6          | 7      | 2.518E7 | 919   | 102.9    | 6.21     |
| Q8T6I0    | EH domain containing protein OS=Drosophila melanogaster GN=Past1 PE=2 SV=1 - [Q8T6I0_DROME]                    | 8.53  | 6.18     | 2          | 2                 | 2          | 4      | 3.792E7 | 534   | 61.0     | 6.51     |
| Q9VA18    | Lethal (3) 03670 OS=Drosophila melanogaster GN=(3)03670 PE=2 SV=1 - [Q9VA18_DROME]                             | 8.52  | 27.80    | 1          | 4                 | 4          | 6      | 4.637E7 | 223   | 24.2     | 8.97     |
| Q9VQB4    | CG3609, isoform B OS=Drosophila melanogaster GN=CG3609 PE=2 SV=1 - [Q9VQB4_DROME]                              | 8.50  | 7.46     | 1          | 3                 | 3          | 4      | 5.417E7 | 335   | 37.3     | 7.52     |
| Q6IDF5    | CG12859 OS=Drosophila melanogaster GN=CG12859 PE=2 SV=1 - [Q6IDF5_DROME]                                       | 8.46  | 24.78    | 1          | 2                 | 2          | 4      | 5.588E7 | 113   | 13.1     | 9.82     |
| Q9VAX8    | CG4849 OS=Drosophila melanogaster GN=CG4849 PE=2 SV=1 - [Q9VAX8_DROME]                                         | 8.46  | 5.95     | 1          | 4                 | 4          | 5      | 2.312E7 | 975   | 110.6    | 5.03     |
| Q9V3A8    | Ergic53, isoform A OS=Drosophila melanogaster GN=ergic53 PE=2 SV=1 - [Q9V3A8_DROME]                            | 8.45  | 10.74    | 1          | 3                 | 3          | 4      | 3.068E7 | 512   | 57.5     | 6.07     |
| Q06943    | High mobility group protein Z OS=Drosophila melanogaster GN=HmgZ PE=1 SV=1 - [HMGZ_DROME]                      | 8.45  | 35.14    | 1          | 4                 | 5          | 5      | 3.757E7 | 111   | 12.6     | 9.29     |
| Q9XYU0    | DNA replication licensing factor Mcm7 OS=Drosophila melanogaster GN=Mcm7 PE=1 SV=1 - [MCM7_DROME]              | 8.44  | 5.83     | 1          | 4                 | 4          | 5      | 2.440E7 | 720   | 81.2     | 6.99     |
| Q7KUA4    | LD22577p OS=Drosophila melanogaster GN=Uba2 PE=2 SV=1 - [Q7KUA4_DROME]                                         | 8.43  | 10.86    | 1          | 5                 | 5          | 9      | 3.473E7 | 700   | 77.6     | 5.02     |
| P15348    | DNA topoisomerase 2 OS=Drosophila melanogaster GN=Top2 PE=1 SV=1 - [TOP2_DROME]                                | 8.41  | 6.01     | 1          | 6                 | 6          | 8      | 2.532E7 | 1447  | 164.3    | 8.22     |
| Q7KMM4    | BcDNA.GH04962 OS=Drosophila melanogaster GN=BcDNA.GH04962 PE=2 SV=1 - [Q7KMM4_DROME]                           | 8.40  | 6.28     | 1          | 3                 | 3          | 6      | 4.407E7 | 924   | 105.7    | 6.51     |
| M9ND61    | Upstream of N-ras, isoform C OS=Drosophila melanogaster GN=Unr PE=4 SV=1 - [M9ND61_DROME]                      | 8.40  | 2.62     | 3          | 2                 | 2          | 3      | 4.119E6 | 1032  | 115.8    | 6.55     |
| Q955Y7    | LD39266p OS=Drosophila melanogaster GN=Sar1 PE=2 SV=1 - [Q955Y7_DROME]                                         | 8.35  | 28.39    | 2          | 3                 | 3          | 4      | 1.066E8 | 155   | 17.5     | 5.92     |
| P49963    | Signal recognition particle 19 kDa protein OS=Drosophila melanogaster GN=Srp19 PE=2 SV=2 - [SRP19_DROME]       | 8.34  | 24.38    | 1          | 2                 | 2          | 3      | 1.045E7 | 160   | 18.4     | 10.04    |
| Q8IMV6    | CG6995, isoform B OS=Drosophila melanogaster GN=Saf-B PE=4 SV=2 - [Q8IMV6_DROME]                               | 8.34  | 4.74     | 3          | 3                 | 3          | 3      | 1.945E7 | 928   | 102.0    | 7.47     |
| Q7KSM5    | Aos1 OS=Drosophila melanogaster GN=Aos1 PE=2 SV=1 - [Q7KSM5_DROME]                                             | 8.28  | 15.43    | 1          | 4                 | 4          | 6      | 1.223E8 | 337   | 37.6     | 5.44     |
| Q9VD02    | CG7054 OS=Drosophila melanogaster GN=CG7054 PE=1 SV=1 - [Q9VD02_DROME]                                         | 8.24  | 13.41    | 1          | 2                 | 2          | 3      | 1.120E8 | 179   | 19.8     | 5.21     |
| Q9VKW8    | CG17768, isoform B OS=Drosophila melanogaster GN=LSm-4-RB PE=1 SV=3 - [Q9VKW8_DROME]                           | 8.22  | 24.68    | 1          | 3                 | 3          | 5      | 2.388E7 | 154   | 16.9     | 10.05    |
| Q7JVK8    | CG5323 OS=Drosophila melanogaster GN=CG5323 PE=2 SV=1 - [Q7JVK8_DROME]                                         | 7.99  | 33.56    | 1          | 4                 | 4          | 5      | 3.884E7 | 146   | 16.6     | 7.24     |
| Q9VHN6    | 39S ribosomal protein L19, mitochondrial OS=Drosophila melanogaster GN=mRpl19 PE=2 SV=1 - [RM19_DROME]         | 7.98  | 8.17     | 1          | 2                 | 2          | 4      | 1.608E7 | 306   | 36.2     | 8.82     |
| Q9W5N2    | 60S ribosomal protein L38 OS=Drosophila melanogaster GN=Rpl38 PE=1 SV=1 - [RL38_DROME]                         | 7.98  | 25.71    | 1          | 2                 | 2          | 5      | 8.356E8 | 70    | 8.2      | 10.29    |
| O18335    | Drab11 OS=Drosophila melanogaster GN=Rab11 PE=2 SV=1 - [O18335_DROME]                                          | 7.93  | 22.90    | 1          | 5                 | 5          | 7      | 1.668E8 | 214   | 24.2     | 5.73     |
| P54353    | Putative peptidyl-prolyl cis-trans isomerase dodo OS=Drosophila melanogaster GN=dod PE=2 SV=3 - [DOD_DROME]    | 7.92  | 23.49    | 1          | 3                 | 3          | 3      | 3.330E7 | 166   | 18.4     | 7.44     |
| Q9W4K0    | CHOp24, isoform A OS=Drosophila melanogaster GN=CHOp24 PE=2 SV=1 - [Q9W4K0_DROME]                              | 7.90  | 24.04    | 1          | 5                 | 5          | 6      | 7.408E7 | 208   | 23.2     | 5.76     |
| P41043    | Glutathione S-transferase S1 OS=Drosophila melanogaster GN=GstS1 PE=1 SV=2 - [GST1_DROME]                      | 7.90  | 12.85    | 1          | 3                 | 3          | 5      | 6.399E7 | 249   | 27.6     | 4.65     |
| Q8T0J5    | CG7675, isoform A OS=Drosophila melanogaster GN=CG7675 PE=2 SV=1 - [Q8T0J5_DROME]                              | 7.87  | 13.94    | 2          | 3                 | 3          | 4      | 6.995E7 | 287   | 31.4     | 9.32     |
| P48604    | GrpE protein homolog, mitochondrial OS=Drosophila melanogaster GN=Roe1 PE=2 SV=2 - [GRPE_DROME]                | 7.86  | 18.78    | 1          | 3                 | 3          | 4      | 2.545E7 | 213   | 23.9     | 8.50     |
| Q9VYY2    | Signal peptidase complex subunit 2 OS=Drosophila melanogaster GN=Spase25 PE=2 SV=1 - [SPCS2_DROME]             | 7.83  | 14.57    | 1          | 3                 | 3          | 4      | 5.684E7 | 199   | 22.2     | 8.78     |
| P20028    | DNA-directed RNA polymerase I subunit RPA2 OS=Drosophila melanogaster GN=Rp1135 PE=2 SV=2 - [RPA2_DROME]       | 7.82  | 3.81     | 1          | 3                 | 3          | 3      | 1.541E7 | 1129  | 128.4    | 8.41     |
| O77134    | 9 kD basic protein OS=Drosophila melanogaster GN=c550 PE=2 SV=1 - [O77134_DROME]                               | 7.70  | 24.69    | 1          | 2                 | 2          | 3      | 3.296E8 | 81    | 9.0      | 10.07    |
| Q9VEZ6    | CG10407 OS=Drosophila melanogaster GN=CG10407 PE=4 SV=1 - [Q9VEZ6_DROME]                                       | 7.68  | 20.08    | 1          | 4                 | 4          | 6      | 7.198E7 | 259   | 29.5     | 7.21     |
| A4V4C1    | Casein kinase II beta subunit, isoform C OS=Drosophila melanogaster GN=CkIibeta PE=2 SV=1 - [A4V4C1_DROME]     | 7.68  | 20.00    | 5          | 3                 | 3          | 4      | 8.534E7 | 215   | 24.8     | 5.55     |
| Q9VXI6    | Cytochrome b-c1 complex subunit 7 OS=Drosophila melanogaster GN=CG3560 PE=2 SV=1 - [Q9VXI6_DROME]              | 7.67  | 33.33    | 2          | 4                 | 4          | 5      | 6.284E7 | 111   | 13.6     | 8.10     |

| Accession | Description                                                                                                              | Score | Coverage | # Proteins | # Unique Peptides | # Peptides | # PSMs | Area    | # AAs | MW [kDa] | calc. pI |
|-----------|--------------------------------------------------------------------------------------------------------------------------|-------|----------|------------|-------------------|------------|--------|---------|-------|----------|----------|
| Q9VGZ3    | Iron regulatory protein 1B OS=Drosophila melanogaster GN=Irp-1B PE=4 SV=1 - [Q9VGZ3_DROME]                               | 7.67  | 7.68     | 1          | 5                 | 5          | 6      | 8.280E6 | 899   | 98.5     | 5.95     |
| Q9VRP3    | AT08565p OS=Drosophila melanogaster GN=Txl PE=2 SV=1 - [Q9VRP3_DROME]                                                    | 7.66  | 16.72    | 1          | 4                 | 4          | 6      | 1.095E8 | 287   | 31.7     | 5.83     |
| M9NFL1    | eIF5B, isoform D OS=Drosophila melanogaster GN=eIF5B PE=4 SV=1 - [M9NFL1_DROME]                                          | 7.61  | 6.15     | 3          | 4                 | 4          | 4      | 3.763E7 | 1090  | 121.0    | 5.50     |
| Q9U4L6    | Mitochondrial import receptor subunit TOM40 homolog 1 OS=Drosophila melanogaster GN=Tom40 PE=2 SV=2 - [TO401_DROME]      | 7.61  | 15.99    | 1          | 4                 | 4          | 5      | 3.358E7 | 344   | 36.3     | 7.09     |
| Q9W5A7    | CG11381 OS=Drosophila melanogaster GN=CG11381-RA PE=2 SV=2 - [Q9W5A7_DROME]                                              | 7.56  | 11.70    | 1          | 3                 | 3          | 5      | 1.503E7 | 436   | 49.9     | 6.73     |
| P25867    | Ubiquitin-conjugating enzyme E2-17 kDa OS=Drosophila melanogaster GN=eff PE=2 SV=1 - [UBCD1_DROME]                       | 7.52  | 17.69    | 1          | 3                 | 3          | 6      | 1.466E8 | 147   | 16.7     | 7.30     |
| P26270    | 26S proteasome non-ATPase regulatory subunit 7 OS=Drosophila melanogaster GN=Rpn8 PE=1 SV=6 - [PSMD7_DROME]              | 7.52  | 23.37    | 1          | 5                 | 5          | 8      | 6.087E7 | 338   | 38.1     | 6.71     |
| Q9W1H5    | Decapping protein 1, isoform A OS=Drosophila melanogaster GN=Dcp1 PE=1 SV=1 - [Q9W1H5_DROME]                             | 7.43  | 10.75    | 1          | 3                 | 3          | 5      | 9.425E7 | 372   | 41.3     | 7.17     |
| Q9VBQ5    | CG5112 OS=Drosophila melanogaster GN=CG5112 PE=2 SV=1 - [Q9VBQ5_DROME]                                                   | 7.40  | 4.40     | 1          | 2                 | 2          | 3      | 4.210E7 | 523   | 58.4     | 8.34     |
| Q9W4J4    | CG11444, isoform A OS=Drosophila melanogaster GN=CG11444 PE=2 SV=1 - [Q9W4J4_DROME]                                      | 7.25  | 8.37     | 1          | 1                 | 1          | 2      | 4.146E8 | 215   | 22.9     | 9.38     |
| Q9VB04    | Barentsz, isoform A OS=Drosophila melanogaster GN=btz PE=2 SV=1 - [Q9VB04_DROME]                                         | 7.23  | 11.04    | 2          | 4                 | 4          | 5      | 1.166E7 | 761   | 83.6     | 5.49     |
| Q9VJJO    | Proteasome subunit beta type OS=Drosophila melanogaster GN=Prosbeta4 PE=1 SV=1 - [Q9VJJO_DROME]                          | 7.21  | 23.38    | 1          | 3                 | 3          | 4      | 1.991E7 | 201   | 22.5     | 6.39     |
| Q9W0M7    | CG13900-PA, isoform A OS=Drosophila melanogaster GN=CG13900-RA PE=2 SV=2 - [Q9W0M7_DROME]                                | 7.16  | 4.40     | 2          | 4                 | 4          | 4      | 1.057E7 | 1227  | 136.5    | 5.47     |
| Q9VMI5    | CG9135 protein OS=Drosophila melanogaster GN=CG9135 PE=2 SV=1 - [Q9VMI5_DROME]                                           | 7.15  | 7.19     | 1          | 2                 | 2          | 5      | 1.522E8 | 487   | 53.4     | 7.18     |
| Q9VKJ3    | Nuclear pore complex protein Nup160 homolog OS=Drosophila melanogaster GN=Nup160 PE=1 SV=1 - [NU160_DROME]               | 7.13  | 2.91     | 1          | 3                 | 3          | 3      | 1.894E7 | 1411  | 160.2    | 5.36     |
| Q9VQE0    | Dynamin related protein 1, isoform A OS=Drosophila melanogaster GN=Drp1 PE=2 SV=1 - [Q9VQE0_DROME]                       | 7.11  | 7.48     | 1          | 5                 | 5          | 6      | 3.004E7 | 735   | 82.5     | 6.98     |
| Q9VUH8    | RE01471p OS=Drosophila melanogaster GN=Tdrd3 PE=2 SV=1 - [Q9VUH8_DROME]                                                  | 7.05  | 4.67     | 1          | 2                 | 2          | 3      | 4.001E6 | 836   | 91.7     | 9.58     |
| Q9W4X7    | Eukaryotic translation initiation factor 3 subunit G-1 OS=Drosophila melanogaster GN=eIF3-S4-1 PE=1 SV=1 - [E13G1_DROME] | 7.05  | 20.07    | 1          | 5                 | 5          | 9      | 8.054E7 | 269   | 29.9     | 8.79     |
| Q9VSC3    | Ribonuclease X25 OS=Drosophila melanogaster GN=RNaseX25 PE=3 SV=1 - [Q9VSC3_DROME]                                       | 7.03  | 4.31     | 1          | 1                 | 1          | 2      | 1.756E7 | 325   | 37.5     | 5.25     |
| O97067    | Probable peptidyl-tRNA hydrolase 2 OS=Drosophila melanogaster GN=CG1307 PE=2 SV=2 - [PTH2_DROME]                         | 7.03  | 20.97    | 1          | 3                 | 3          | 3      | 2.318E7 | 186   | 19.9     | 8.90     |
| Q9Y134    | L2.35Df OS=Drosophila melanogaster GN=l(2)35Df PE=2 SV=1 - [Q9Y134_DROME]                                                | 7.01  | 2.94     | 1          | 3                 | 3          | 3      | 1.176E7 | 1055  | 118.9    | 6.77     |
| A1Z8D0    | CG6751 OS=Drosophila melanogaster GN=nclb PE=4 SV=1 - [A1Z8D0_DROME]                                                     | 6.94  | 16.12    | 1          | 4                 | 4          | 4      | 1.858E7 | 459   | 51.4     | 4.39     |
| A1Z9M2    | CG8331 OS=Drosophila melanogaster GN=CG8331 PE=4 SV=1 - [A1Z9M2_DROME]                                                   | 6.93  | 15.73    | 2          | 3                 | 3          | 5      | 7.097E7 | 178   | 20.3     | 7.80     |
| Q9VTF8    | CG7636-PA OS=Drosophila melanogaster GN=mRpl2 PE=4 SV=1 - [Q9VTF8_DROME]                                                 | 6.89  | 11.90    | 1          | 2                 | 2          | 2      | 1.352E7 | 294   | 32.8     | 10.36    |
| Q9W1F7    | CG2970 OS=Drosophila melanogaster GN=CG2970 PE=2 SV=2 - [Q9W1F7_DROME]                                                   | 6.89  | 10.38    | 1          | 3                 | 3          | 4      | 2.553E7 | 366   | 40.5     | 8.84     |
| Q8IQP2    | Coat protein (Coatome) zeta, isoform C OS=Drosophila melanogaster GN=zetaCOP PE=4 SV=1 - [Q8IQP2_DROME]                  | 6.87  | 11.66    | 2          | 1                 | 1          | 2      | 3.148E7 | 163   | 18.7     | 5.10     |
| Q9W499    | CG4111-PB, isoform B OS=Drosophila melanogaster GN=Rpl35 PE=1 SV=2 - [Q9W499_DROME]                                      | 6.86  | 15.45    | 1          | 2                 | 2          | 5      | 7.984E6 | 123   | 14.4     | 11.18    |
| Q9VG32    | Malic enzyme OS=Drosophila melanogaster GN=Men PE=2 SV=1 - [Q9VG32_DROME]                                                | 6.86  | 6.98     | 2          | 4                 | 4          | 5      | 2.698E7 | 759   | 84.3     | 7.21     |
| Q9VTB0    | CG8003, isoform A OS=Drosophila melanogaster GN=CG8003 PE=2 SV=1 - [Q9VTB0_DROME]                                        | 6.78  | 11.79    | 1          | 3                 | 3          | 4      | 1.118E7 | 407   | 45.7     | 7.62     |
| Q9VMI3    | CG9140, isoform B OS=Drosophila melanogaster GN=CG9140 PE=2 SV=1 - [Q9VMI3_DROME]                                        | 6.75  | 14.14    | 1          | 4                 | 4          | 4      | 2.606E7 | 474   | 51.8     | 8.47     |
| Q7KNF2    | Polyadenylate-binding protein 2 OS=Drosophila melanogaster GN=Pabp2 PE=2 SV=1 - [PABP2_DROME]                            | 6.75  | 13.39    | 1          | 2                 | 2          | 3      | 1.520E7 | 224   | 25.0     | 5.20     |
| Q9XYN7    | Proteasome subunit beta type-3 OS=Drosophila melanogaster GN=Prosbeta3 PE=2 SV=1 - [PSB3_DROME]                          | 6.74  | 23.41    | 1          | 4                 | 4          | 6      | 1.103E8 | 205   | 23.2     | 5.44     |
| Q9V9K7    | Serrate RNA effector molecule homolog OS=Drosophila melanogaster GN=Ars2 PE=1 SV=2 - [SRRT_DROME]                        | 6.74  | 7.10     | 1          | 5                 | 5          | 5      | 2.733E7 | 943   | 107.2    | 5.55     |
| Q9VHS2    | Probable cytochrome c oxidase subunit 7A, mitochondrial OS=Drosophila melanogaster GN=CG9603 PE=1 SV=1 - [COX7A_DROME]   | 6.70  | 28.09    | 1          | 4                 | 4          | 5      | 3.287E7 | 89    | 9.9      | 10.05    |
| Q9VUL1    | CTP synthase OS=Drosophila melanogaster GN=CTPsyn PE=1 SV=2 - [PYRG_DROME]                                               | 6.68  | 7.81     | 1          | 4                 | 4          | 4      | 5.733E7 | 627   | 69.4     | 7.24     |
| P42271    | Tubulin gamma-2 chain OS=Drosophila melanogaster GN=gammaTub37C PE=2 SV=3 - [TBG2_DROME]                                 | 6.67  | 9.85     | 1          | 3                 | 3          | 4      | 1.263E7 | 457   | 51.3     | 6.32     |
| P41375    | Eukaryotic translation initiation factor 2 subunit 2 OS=Drosophila melanogaster GN=eIF-2beta PE=1 SV=1 - [IF2B_DROME]    | 6.65  | 11.54    | 1          | 4                 | 4          | 6      | 1.042E8 | 312   | 35.2     | 5.77     |
| Q9Y0Y5    | BcDNA.LD29885 OS=Drosophila melanogaster GN=epsilonCOP PE=2 SV=1 - [Q9Y0Y5_DROME]                                        | 6.65  | 4.90     | 1          | 1                 | 1          | 3      | 1.373E7 | 306   | 34.6     | 4.87     |
| P32748    | Dihydroorotate dehydrogenase (quinone), mitochondrial OS=Drosophila melanogaster GN=Dhod PE=2 SV=2 - [PYRD_DROME]        | 6.64  | 7.41     | 1          | 2                 | 2          | 4      | 2.769E7 | 405   | 44.3     | 9.25     |
| Q7K0B6    | CG30000 OS=Drosophila melanogaster GN=GstT1 PE=2 SV=1 - [Q7K0B6_DROME]                                                   | 6.64  | 8.33     | 1          | 2                 | 2          | 3      | 1.653E7 | 228   | 26.6     | 8.97     |
| Q7KJ73    | Tetraspanin OS=Drosophila melanogaster GN=Tsp42Ee PE=2 SV=1 - [Q7KJ73_DROME]                                             | 6.63  | 21.49    | 1          | 3                 | 3          | 4      | 9.819E7 | 228   | 24.8     | 7.11     |
| Q9VKC1    | IP16805p OS=Drosophila melanogaster GN=Rpl7-like PE=2 SV=2 - [Q9VKC1_DROME]                                              | 6.61  | 17.12    | 1          | 3                 | 3          | 4      | 1.049E7 | 257   | 29.1     | 10.10    |
| Q9VG79    | Dipeptidase C OS=Drosophila melanogaster GN=Dip-C PE=2 SV=2 - [Q9VG79_DROME]                                             | 6.55  | 2.24     | 1          | 1                 | 1          | 3      | 1.013E7 | 491   | 54.6     | 5.57     |
| Q960Z0    | Kinesin-like protein Klp10A OS=Drosophila melanogaster GN=Klp10A PE=1 SV=1 - [KI10A_DROME]                               | 6.51  | 3.98     | 3          | 3                 | 3          | 4      | 1.670E7 | 805   | 88.6     | 7.21     |
| Q9W1Y1    | ER membrane protein complex subunit 8/9 homolog OS=Drosophila melanogaster GN=CG3501 PE=1 SV=1 - [EMC89_DROME]           | 6.51  | 7.39     | 1          | 1                 | 1          | 2      | 2.240E7 | 203   | 22.8     | 6.05     |
| Q9VAD0    | Acid phosphatase 1, isoform A OS=Drosophila melanogaster GN=AcpH-1 PE=2 SV=1 - [Q9VAD0_DROME]                            | 6.50  | 7.99     | 2          | 2                 | 2          | 3      | 8.869E6 | 438   | 50.1     | 6.68     |
| Q9VVA0    | Cold shock domain-containing protein CG9705 OS=Drosophila melanogaster GN=CG9705 PE=1 SV=1 - [Y9705_DROME]               | 6.48  | 17.48    | 1          | 2                 | 2          | 5      | 1.014E8 | 143   | 15.8     | 8.47     |
| Q9VD51    | Probable ATP-dependent RNA helicase pitchoune OS=Drosophila melanogaster GN=pit PE=2 SV=2 - [DDX18_DROME]                | 6.43  | 5.15     | 1          | 3                 | 3          | 3      | 2.565E7 | 680   | 76.9     | 7.97     |
| Q9VF27    | GM02062p OS=Drosophila melanogaster GN=ND23 PE=2 SV=1 - [Q9VF27_DROME]                                                   | 6.42  | 11.98    | 1          | 2                 | 2          | 2      | 2.934E6 | 217   | 24.6     | 5.88     |
| Q9VCC6    | CG6178 OS=Drosophila melanogaster GN=CG6178 PE=2 SV=1 - [Q9VCC6_DROME]                                                   | 6.41  | 6.62     | 1          | 3                 | 3          | 3      | 2.690E7 | 544   | 59.9     | 8.10     |

| Accession | Description                                                                                                              | Score | Coverage | # Proteins | # Unique Peptides | # Peptides | # PSMs | Area    | # AAs | MW [kDa] | calc. pI |
|-----------|--------------------------------------------------------------------------------------------------------------------------|-------|----------|------------|-------------------|------------|--------|---------|-------|----------|----------|
| Q9VVB8    | CG32171-PA, isoform A OS=Drosophila melanogaster GN=Lmpt PE=2 SV=1 - [Q9VVB8_DROME]                                      | 6.41  | 12.65    | 7          | 2                 | 2          | 4      |         | 245   | 27.7     | 8.24     |
| Q9VZL3    | Sc2 OS=Drosophila melanogaster GN=Sc2 PE=4 SV=1 - [Q9VZL3_DROME]                                                         | 6.38  | 12.25    | 1          | 3                 | 3          | 7      | 3.019E7 | 302   | 34.2     | 9.61     |
| Q9VGA3    | CG4115 OS=Drosophila melanogaster GN=CG4115 PE=2 SV=2 - [Q9VGA3_DROME]                                                   | 6.38  | 8.64     | 1          | 1                 | 1          | 2      | 9.680E6 | 220   | 25.3     | 7.58     |
| Q7KR12    | Longitudinals lacking protein-like OS=Drosophila melanogaster GN=lolal PE=1 SV=1 - [LOLAL_DROME]                         | 6.37  | 11.81    | 1          | 1                 | 1          | 2      | 1.597E7 | 127   | 14.5     | 7.40     |
| Q9VBH7    | CG14544 OS=Drosophila melanogaster GN=CG14544 PE=2 SV=1 - [Q9VBH7_DROME]                                                 | 6.34  | 4.42     | 1          | 1                 | 1          | 3      | 1.341E7 | 317   | 35.1     | 7.03     |
| A4UZR3    | Trehalase OS=Drosophila melanogaster GN=Treh PE=3 SV=1 - [A4UZR3_DROME]                                                  | 6.34  | 11.25    | 2          | 4                 | 4          | 6      | 1.460E7 | 560   | 63.5     | 5.20     |
| Q9VUZ0    | Translocon-associated protein subunit beta OS=Drosophila melanogaster GN=SsRbeta PE=2 SV=2 - [Q9VUZ0_DROME]              | 6.32  | 19.47    | 1          | 2                 | 2          | 8      | 1.371E8 | 190   | 21.2     | 8.72     |
| A1Z6H7    | Gp210 OS=Drosophila melanogaster GN=Gp210 PE=4 SV=1 - [A1Z6H7_DROME]                                                     | 6.32  | 3.25     | 1          | 4                 | 4          | 4      | 1.833E7 | 1876  | 209.7    | 6.47     |
| A1Z934    | CG8778 OS=Drosophila melanogaster GN=CG8778 PE=2 SV=1 - [A1Z934_DROME]                                                   | 6.31  | 9.36     | 1          | 2                 | 2          | 3      | 3.302E7 | 299   | 31.9     | 8.22     |
| M9PFG7    | Kinesin light chain, isoform C OS=Drosophila melanogaster GN=Klc PE=4 SV=1 - [M9PFG7_DROME]                              | 6.30  | 4.34     | 2          | 2                 | 2          | 3      |         | 507   | 57.9     | 6.16     |
| O62602    | CG12244-PA OS=Drosophila melanogaster GN=lic PE=2 SV=1 - [O62602_DROME]                                                  | 6.30  | 3.89     | 1          | 1                 | 1          | 4      | 2.830E7 | 334   | 38.2     | 6.39     |
| M9PGX2    | Pretaporter, isoform D OS=Drosophila melanogaster GN=prtp PE=4 SV=1 - [M9PGX2_DROME]                                     | 6.29  | 11.90    | 2          | 4                 | 4          | 4      | 4.410E7 | 353   | 39.8     | 5.43     |
| Q81RH7    | CG9148-PB, isoform B OS=Drosophila melanogaster GN=scf PE=4 SV=1 - [Q81RH7_DROME]                                        | 6.28  | 8.33     | 2          | 1                 | 1          | 2      |         | 192   | 22.3     | 4.50     |
| Q9VH81    | GH12714p OS=Drosophila melanogaster GN=PpD3 PE=2 SV=1 - [Q9VH81_DROME]                                                   | 6.28  | 12.31    | 1          | 5                 | 5          | 6      | 3.878E7 | 520   | 59.2     | 6.23     |
| Q9VFW4    | MIP09035p OS=Drosophila melanogaster GN=poly PE=2 SV=1 - [Q9VFW4_DROME]                                                  | 6.28  | 11.55    | 1          | 2                 | 2          | 4      | 9.826E6 | 251   | 27.9     | 6.90     |
| Q9VQ62    | Protein NPC2 homolog OS=Drosophila melanogaster GN=Npc2a PE=1 SV=1 - [NPC2_DROME]                                        | 6.28  | 20.95    | 1          | 2                 | 2          | 3      | 8.469E7 | 148   | 16.0     | 5.31     |
| P33438    | Glutactin OS=Drosophila melanogaster GN=GlT PE=1 SV=2 - [GLT_DROME]                                                      | 6.23  | 9.45     | 1          | 6                 | 6          | 8      | 6.464E7 | 1026  | 118.7    | 4.77     |
| Q7JVK1    | HL07956p OS=Drosophila melanogaster GN=mRpL18 PE=2 SV=1 - [Q7JVK1_DROME]                                                 | 6.23  | 26.34    | 1          | 3                 | 3          | 3      | 1.734E7 | 186   | 21.2     | 9.29     |
| Q9VL00    | Ubiquitin thioesterase otubain-like OS=Drosophila melanogaster GN=CG4968 PE=2 SV=1 - [OTUBL_DROME]                       | 6.15  | 11.07    | 1          | 2                 | 2          | 2      | 4.219E7 | 262   | 30.4     | 4.98     |
| P55035    | 26S proteasome non-ATPase regulatory subunit 4 OS=Drosophila melanogaster GN=Rpn10 PE=1 SV=2 - [PSMD4_DROME]             | 6.14  | 12.63    | 1          | 3                 | 3          | 7      | 8.361E7 | 396   | 42.6     | 4.83     |
| Q9VY91    | LD21074p OS=Drosophila melanogaster GN=Pcdc4 PE=2 SV=2 - [Q9VY91_DROME]                                                  | 6.12  | 6.88     | 1          | 1                 | 1          | 3      |         | 509   | 56.3     | 5.97     |
| Q9VPR5    | CG2807, isoform A OS=Drosophila melanogaster GN=CG2807 PE=4 SV=2 - [Q9VPR5_DROME]                                        | 6.11  | 2.54     | 1          | 2                 | 2          | 3      |         | 1340  | 149.5    | 6.67     |
| Q81RD0    | CG32267 OS=Drosophila melanogaster GN=CG32267 PE=2 SV=1 - [Q81RD0_DROME]                                                 | 6.06  | 28.57    | 1          | 1                 | 1          | 2      | 5.492E7 | 49    | 5.5      | 9.98     |
| Q24046    | Sodium/potassium-transporting ATPase subunit beta-1 OS=Drosophila melanogaster GN=nrv1 PE=1 SV=2 - [ATPB1_DROME]         | 6.06  | 9.39     | 1          | 4                 | 4          | 4      | 6.591E7 | 309   | 35.3     | 6.38     |
| Q9VW56    | Probable prefoldin subunit 6 OS=Drosophila melanogaster GN=CG7770 PE=2 SV=1 - [PFD6_DROME]                               | 6.05  | 21.60    | 1          | 3                 | 3          | 4      | 1.751E7 | 125   | 14.4     | 8.51     |
| X2JEK3    | Wispy, isoform B OS=Drosophila melanogaster GN=wisp PE=4 SV=1 - [X2JEK3_DROME]                                           | 6.05  | 2.26     | 2          | 2                 | 2          | 2      | 4.979E6 | 1372  | 151.1    | 8.70     |
| Q9VWH5    | AT13736p OS=Drosophila melanogaster GN=CG7580 PE=2 SV=1 - [Q9VWH5_DROME]                                                 | 6.03  | 40.45    | 1          | 5                 | 5          | 5      | 1.270E8 | 89    | 10.1     | 10.08    |
| Q0E8X7    | CG30415, isoform A OS=Drosophila melanogaster GN=CG30415 PE=4 SV=1 - [Q0E8X7_DROME]                                      | 6.02  | 25.61    | 1          | 2                 | 2          | 3      | 1.237E7 | 82    | 9.5      | 9.67     |
| Q9VDS6    | Surfeit locus protein 6 homolog OS=Drosophila melanogaster GN=Surf6 PE=1 SV=1 - [SURF6_DROME]                            | 5.98  | 4.94     | 1          | 1                 | 1          | 3      | 1.514E7 | 324   | 38.1     | 9.85     |
| O62530    | AP-50, isoform A OS=Drosophila melanogaster GN=AP-2mu PE=2 SV=1 - [O62530_DROME]                                         | 5.97  | 6.41     | 1          | 2                 | 2          | 3      | 1.186E7 | 437   | 49.8     | 9.48     |
| Q94901    | RNA-binding protein lark OS=Drosophila melanogaster GN=lark PE=1 SV=1 - [LARK_DROME]                                     | 5.94  | 7.39     | 1          | 2                 | 2          | 3      | 7.522E7 | 352   | 39.9     | 9.07     |
| Q6NP72    | CG13220 OS=Drosophila melanogaster GN=CG13220 PE=2 SV=1 - [Q6NP72_DROME]                                                 | 5.94  | 22.88    | 1          | 2                 | 2          | 4      | 1.440E7 | 153   | 16.4     | 9.44     |
| Q6AWN0    | 1,2-dihydroxy-3-keto-5-methylthiopentene dioxygenase OS=Drosophila melanogaster GN=CG32068 PE=2 SV=2 - [MTND_DROME]      | 5.90  | 8.60     | 1          | 1                 | 1          | 2      | 1.318E7 | 186   | 22.2     | 5.35     |
| Q9VD66    | Female-specific independent of transformer OS=Drosophila melanogaster GN=fit PE=2 SV=1 - [Q9VD66_DROME]                  | 5.89  | 19.83    | 1          | 2                 | 2          | 4      | 1.066E8 | 121   | 13.9     | 7.58     |
| Q9VVH3    | CG7603-PA OS=Drosophila melanogaster GN=CG7603 PE=2 SV=1 - [Q9VVH3_DROME]                                                | 5.88  | 16.39    | 1          | 2                 | 2          | 3      | 1.186E7 | 122   | 13.7     | 9.33     |
| Q7JYJ0    | Coronin OS=Drosophila melanogaster GN=coro PE=2 SV=1 - [Q7JYJ0_DROME]                                                    | 5.87  | 4.55     | 1          | 2                 | 2          | 2      | 3.075E7 | 528   | 57.2     | 6.38     |
| M9PBM2    | Encore, isoform G OS=Drosophila melanogaster GN=enc PE=4 SV=1 - [M9PBM2_DROME]                                           | 5.84  | 1.95     | 5          | 1                 | 1          | 1      | 1.461E7 | 1798  | 187.7    | 8.37     |
| Q9VES1    | ARL-6-interacting protein 1 homolog OS=Drosophila melanogaster GN=CG10326 PE=2 SV=1 - [AR6P1_DROME]                      | 5.83  | 6.09     | 1          | 1                 | 1          | 3      |         | 197   | 22.2     | 8.84     |
| P51406    | Bystin OS=Drosophila melanogaster GN=bys PE=1 SV=2 - [BYS_DROME]                                                         | 5.81  | 8.94     | 1          | 3                 | 3          | 3      | 5.223E6 | 436   | 49.9     | 8.46     |
| Q9VV74    | Survival motor neuron protein OS=Drosophila melanogaster GN=Snn PE=1 SV=1 - [SMN_DROME]                                  | 5.81  | 4.87     | 1          | 1                 | 1          | 2      | 1.536E7 | 226   | 24.6     | 5.29     |
| Q9V464    | Histone chaperone asf1 OS=Drosophila melanogaster GN=asf1 PE=1 SV=1 - [ASF1_DROME]                                       | 5.79  | 11.93    | 1          | 2                 | 2          | 2      | 3.899E7 | 218   | 24.4     | 4.60     |
| Q9VY28    | Probable 28S ribosomal protein S25, mitochondrial OS=Drosophila melanogaster GN=mRpS25 PE=2 SV=1 - [RT25_DROME]          | 5.76  | 11.98    | 1          | 2                 | 2          | 2      | 6.101E6 | 167   | 19.1     | 9.11     |
| Q9VUX1    | Mitochondrial ribosomal protein S31 OS=Drosophila melanogaster GN=mRpS31 PE=2 SV=1 - [Q9VUX1_DROME]                      | 5.70  | 18.62    | 1          | 4                 | 4          | 5      | 8.748E6 | 376   | 42.4     | 7.18     |
| A4V2S3    | C-terminal binding protein, isoform B OS=Drosophila melanogaster GN=CtBP PE=3 SV=1 - [A4V2S3_DROME]                      | 5.64  | 9.84     | 2          | 3                 | 3          | 6      | 4.873E7 | 386   | 42.2     | 6.98     |
| Q9Y1A3    | Mitochondrial import inner membrane translocase subunit Tim8 OS=Drosophila melanogaster GN=Tim8 PE=3 SV=1 - [TIM8_DROME] | 5.64  | 17.05    | 1          | 1                 | 1          | 2      | 1.048E8 | 88    | 10.1     | 5.16     |
| P40792    | Ras-related protein Rac1 OS=Drosophila melanogaster GN=Rac1 PE=1 SV=2 - [RAC1_DROME]                                     | 5.62  | 15.10    | 2          | 2                 | 3          | 3      | 9.895E7 | 192   | 21.3     | 8.34     |
| Q9V3E9    | FI17138p1 OS=Drosophila melanogaster GN=spag PE=2 SV=1 - [Q9V3E9_DROME]                                                  | 5.60  | 5.99     | 1          | 2                 | 2          | 2      | 3.674E7 | 534   | 59.6     | 8.34     |
| Q9VN39    | CG9775, isoform A OS=Drosophila melanogaster GN=CG9775 PE=2 SV=1 - [Q9VN39_DROME]                                        | 5.60  | 6.41     | 2          | 2                 | 2          | 2      | 7.649E6 | 421   | 46.1     | 12.48    |
| Q9V595    | Uroporphyrinogen decarboxylase OS=Drosophila melanogaster GN=Updo PE=3 SV=1 - [DCUP_DROME]                               | 5.60  | 5.06     | 2          | 1                 | 1          | 2      | 1.265E7 | 356   | 40.0     | 6.54     |
| Q9VCY1    | CG6937 OS=Drosophila melanogaster GN=CG6937 PE=4 SV=1 - [Q9VCY1_DROME]                                                   | 5.59  | 11.24    | 1          | 4                 | 4          | 4      | 1.002E8 | 356   | 39.5     | 9.77     |

| Accession | Description                                                                                                                   | Score | Coverage | # Proteins | # Unique Peptides | # Peptides | # PSMs | Area    | # AAs | MW [kDa] | calc. pI |
|-----------|-------------------------------------------------------------------------------------------------------------------------------|-------|----------|------------|-------------------|------------|--------|---------|-------|----------|----------|
| Q76NQ9    | AMP deaminase, isoform F OS=Drosophila melanogaster GN=AMPdeam PE=4 SV=2 - [Q76NQ9_DROME]                                     | 5.58  | 5.24     | 9          | 2                 | 2          | 3      | 1.626E7 | 649   | 75.7     | 6.42     |
| Q24133    | DnaJ protein homolog 1 OS=Drosophila melanogaster GN=DnaJ-1 PE=1 SV=3 - [DNAJ1_DROME]                                         | 5.57  | 9.88     | 1          | 2                 | 2          | 2      | 1.421E7 | 334   | 37.0     | 8.85     |
| Q9W3E7    | Chorion protein c at 7F OS=Drosophila melanogaster GN=Cp7Fc PE=2 SV=2 - [Q9W3E7_DROME]                                        | 5.57  | 19.94    | 1          | 3                 | 3          | 4      | 9.091E7 | 321   | 36.4     | 6.29     |
| M9PBH8    | CG2199, isoform C OS=Drosophila melanogaster GN=CG2199 PE=4 SV=1 - [M9PBH8_DROME]                                             | 5.57  | 4.14     | 2          | 2                 | 2          | 2      | 1.180E7 | 724   | 80.9     | 8.59     |
| P00967    | Trifunctional purine biosynthetic protein adenosine-3 OS=Drosophila melanogaster GN=ade3 PE=1 SV=2 - [PUR2_DROME]             | 5.54  | 3.77     | 3          | 4                 | 4          | 6      | 3.255E7 | 1353  | 144.4    | 7.37     |
| Q9W3J5    | Probable phenylalanine--tRNA ligase alpha subunit OS=Drosophila melanogaster GN=CG2263 PE=2 SV=1 - [SYFA_DROME]               | 5.54  | 5.82     | 1          | 3                 | 3          | 4      | 7.847E7 | 498   | 55.6     | 6.76     |
| Q9VD13    | GH02671p OS=Drosophila melanogaster GN=lqfR PE=2 SV=4 - [Q9VD13_DROME]                                                        | 5.53  | 5.39     | 2          | 2                 | 2          | 2      | 1.974E7 | 649   | 69.3     | 5.30     |
| P40423    | Myosin regulatory light chain sqh OS=Drosophila melanogaster GN=sqh PE=1 SV=1 - [SQH_DROME]                                   | 5.52  | 6.32     | 1          | 1                 | 1          | 3      | 7.463E6 | 174   | 19.9     | 4.81     |
| Q9VIF6    | CG9253 OS=Drosophila melanogaster GN=CG9253-RA PE=2 SV=1 - [Q9VIF6_DROME]                                                     | 5.51  | 5.72     | 1          | 2                 | 2          | 3      | 2.741E7 | 507   | 56.5     | 6.81     |
| Q9V458    | COP9 signalosome complex subunit 7 OS=Drosophila melanogaster GN=CSN7 PE=1 SV=2 - [CSN7_DROME]                                | 5.50  | 14.03    | 1          | 2                 | 2          | 3      |         | 278   | 31.0     | 6.70     |
| Q9VB64    | CG31063 OS=Drosophila melanogaster GN=CG31063 PE=4 SV=2 - [Q9VB64_DROME]                                                      | 5.47  | 3.71     | 1          | 1                 | 1          | 2      |         | 404   | 44.4     | 4.87     |
| Q9V429    | Thioredoxin-2 OS=Drosophila melanogaster GN=Trx-2 PE=1 SV=2 - [THIO2_DROME]                                                   | 5.46  | 12.28    | 1          | 2                 | 2          | 2      | 2.543E8 | 114   | 12.7     | 5.03     |
| Q73WR9    | Zinc finger CCCCH domain-containing protein 15 homolog OS=Drosophila melanogaster GN=CG8635 PE=1 SV=1 - [ZC3HF_DROME]         | 5.45  | 6.68     | 1          | 3                 | 3          | 3      | 9.241E7 | 404   | 45.3     | 5.55     |
| O76454    | Pterin-4-alpha-carbinolamine dehydratase OS=Drosophila melanogaster GN=Pcd PE=1 SV=2 - [PHS_DROME]                            | 5.45  | 6.77     | 1          | 1                 | 1          | 2      | 5.302E7 | 192   | 21.1     | 9.76     |
| Q9VTW6    | CG10418-PA OS=Drosophila melanogaster GN=CG10418 PE=4 SV=1 - [Q9VTW6_DROME]                                                   | 5.43  | 20.00    | 1          | 1                 | 1          | 4      | 1.244E7 | 95    | 10.7     | 6.52     |
| Q9VGH5    | AT27789p OS=Drosophila melanogaster GN=glo PE=2 SV=1 - [Q9VGH5_DROME]                                                         | 5.40  | 5.29     | 1          | 2                 | 2          | 6      | 2.600E7 | 586   | 61.4     | 6.04     |
| Q9W3U9    | CG14434, isoform B OS=Drosophila melanogaster GN=CG14434 PE=2 SV=1 - [Q9W3U9_DROME]                                           | 5.39  | 22.99    | 2          | 3                 | 3          | 3      | 4.816E7 | 187   | 21.1     | 5.33     |
| P20232    | Transcription elongation factor S-II OS=Drosophila melanogaster GN=TfIIIS PE=2 SV=1 - [TFS2_DROME]                            | 5.39  | 11.82    | 1          | 2                 | 2          | 2      | 1.006E7 | 313   | 34.3     | 9.06     |
| B7Z0L1    | Fasciclin 1, isoform E OS=Drosophila melanogaster GN=Fas1 PE=4 SV=1 - [B7Z0L1_DROME]                                          | 5.37  | 7.85     | 6          | 3                 | 3          | 3      | 1.054E7 | 624   | 69.4     | 6.92     |
| P40796    | La protein homolog OS=Drosophila melanogaster GN=La PE=1 SV=2 - [LA_DROME]                                                    | 5.37  | 21.54    | 2          | 7                 | 7          | 7      | 1.193E8 | 390   | 44.9     | 7.58     |
| P45889    | Actin-related protein 1 OS=Drosophila melanogaster GN=Arp1 PE=2 SV=2 - [ACTZ_DROME]                                           | 5.37  | 13.03    | 1          | 3                 | 3          | 6      | 6.740E7 | 376   | 42.7     | 7.30     |
| Q9Y112    | BcDNA.GH10614 OS=Drosophila melanogaster GN=BcDNA.GH10614 PE=2 SV=1 - [Q9Y112_DROME]                                          | 5.37  | 6.01     | 1          | 2                 | 2          | 3      | 1.590E7 | 316   | 36.3     | 7.08     |
| Q9Y0Y2    | Adenylosuccinate synthetase OS=Drosophila melanogaster GN=AdSS PE=2 SV=1 - [PURA_DROME]                                       | 5.35  | 12.98    | 1          | 4                 | 4          | 4      | 4.153E7 | 447   | 48.9     | 6.84     |
| Q9GNH8    | Hexokinase A, isoform B OS=Drosophila melanogaster GN=Hex-A PE=3 SV=1 - [Q9GNH8_DROME]                                        | 5.34  | 3.79     | 2          | 1                 | 1          | 2      | 1.509E7 | 448   | 49.9     | 5.81     |
| Q9VEQ1    | CG17556 OS=Drosophila melanogaster GN=CG17556-RA PE=2 SV=1 - [Q9VEQ1_DROME]                                                   | 5.34  | 4.61     | 2          | 1                 | 1          | 2      | 1.273E7 | 282   | 32.7     | 7.05     |
| Q9VKD3    | Probable cysteine desulfurase, mitochondrial OS=Drosophila melanogaster GN=CG12264 PE=2 SV=1 - [NFS1_DROME]                   | 5.34  | 5.19     | 1          | 3                 | 3          | 4      | 2.503E6 | 462   | 51.0     | 8.21     |
| Q9XZ5     | DNA damage-binding protein 1 OS=Drosophila melanogaster GN=pic PE=1 SV=1 - [DDB1_DROME]                                       | 5.32  | 1.23     | 1          | 1                 | 1          | 2      | 4.561E7 | 1140  | 126.0    | 5.36     |
| Q9VTU2    | CG9762-PA OS=Drosophila melanogaster GN=(3)neo18 PE=2 SV=1 - [Q9VTU2_DROME]                                                   | 5.31  | 13.98    | 1          | 2                 | 2          | 2      | 2.043E7 | 186   | 22.0     | 8.51     |
| Q9VDI1    | LD46328p OS=Drosophila melanogaster GN=Synd PE=1 SV=2 - [Q9VDI1_DROME]                                                        | 5.26  | 8.50     | 1          | 3                 | 3          | 3      | 9.073E6 | 494   | 55.9     | 5.63     |
| Q9VZ58    | Purple acid phosphatase OS=Drosophila melanogaster GN=CG1637 PE=2 SV=1 - [Q9VZ58_DROME]                                       | 5.24  | 5.11     | 1          | 2                 | 2          | 2      | 3.764E7 | 450   | 51.8     | 5.67     |
| Q9W141    | Putative ATP synthase subunit f, mitochondrial OS=Drosophila melanogaster GN=CG4692 PE=1 SV=1 - [ATPK_DROME]                  | 5.23  | 20.56    | 1          | 2                 | 2          | 2      | 2.740E8 | 107   | 12.5     | 10.10    |
| Q9V535    | RNA-binding protein 8A OS=Drosophila melanogaster GN=tsu PE=1 SV=1 - [RBM8A_DROME]                                            | 5.19  | 13.94    | 1          | 2                 | 2          | 2      | 4.981E7 | 165   | 19.0     | 5.27     |
| Q86BQ4    | CG2862, isoform B OS=Drosophila melanogaster GN=CG2862 PE=4 SV=1 - [Q86BQ4_DROME]                                             | 5.19  | 18.25    | 2          | 2                 | 2          | 4      | 2.385E8 | 126   | 13.8     | 7.24     |
| Q6NL44    | CG33722, isoform B OS=Drosophila melanogaster GN=CG31188 PE=2 SV=1 - [Q6NL44_DROME]                                           | 5.19  | 4.81     | 1          | 2                 | 2          | 2      | 6.858E6 | 478   | 53.6     | 7.05     |
| Q9XZ03    | Multiprotein Bridging Factor 1 OS=Drosophila melanogaster GN=mbf1 PE=2 SV=1 - [Q9XZ03_DROME]                                  | 5.16  | 21.38    | 2          | 3                 | 3          | 3      | 1.114E8 | 145   | 16.0     | 10.04    |
| Q9W3C2    | Uncharacterized protein CG1785 OS=Drosophila melanogaster GN=CG1785 PE=1 SV=1 - [GSCR2_DROME]                                 | 5.15  | 5.65     | 1          | 2                 | 2          | 2      | 2.587E7 | 478   | 55.8     | 9.76     |
| Q95RI2    | CG10973 OS=Drosophila melanogaster GN=CG10973 PE=2 SV=1 - [Q95RI2_DROME]                                                      | 5.13  | 8.50     | 1          | 2                 | 2          | 2      | 7.942E6 | 306   | 34.0     | 5.34     |
| A5XCL5    | LD36265p (Fragment) OS=Drosophila melanogaster GN=UGP PE=2 SV=1 - [A5XCL5_DROME]                                              | 5.13  | 4.50     | 4          | 2                 | 2          | 2      | 1.601E7 | 511   | 57.8     | 7.40     |
| Q9TVM2    | Exportin-1 OS=Drosophila melanogaster GN=emb PE=1 SV=1 - [XPO1_DROME]                                                         | 5.12  | 5.55     | 1          | 4                 | 4          | 6      | 1.253E7 | 1063  | 122.7    | 5.87     |
| Q9VM71    | 5'-3' exoribonuclease 2 homolog OS=Drosophila melanogaster GN=Rat1 PE=1 SV=2 - [XRN2_DROME]                                   | 5.12  | 4.85     | 1          | 2                 | 2          | 2      |         | 908   | 103.9    | 7.05     |
| Q9VKI3    | Viteline membrane protein Vm32E OS=Drosophila melanogaster GN=Vm32E PE=1 SV=1 - [VTU4_DROME]                                  | 5.11  | 17.24    | 1          | 2                 | 2          | 3      | 1.298E8 | 116   | 12.1     | 5.67     |
| Q917K0    | Microtubule-associated protein Jupiter OS=Drosophila melanogaster GN=Jupiter PE=1 SV=2 - [JUPIT_DROME]                        | 5.08  | 23.08    | 1          | 3                 | 3          | 4      | 7.956E7 | 208   | 22.3     | 10.14    |
| Q9VEJ0    | Peroxisome protein 5037 OS=Drosophila melanogaster GN=Prx3 PE=2 SV=2 - [Q9VEJ0_DROME]                                         | 5.06  | 10.26    | 1          | 2                 | 2          | 2      | 4.676E7 | 234   | 26.4     | 7.49     |
| Q9VM5     | Actin-related protein 2/3 complex subunit 2 OS=Drosophila melanogaster GN=Arpc2 PE=2 SV=2 - [ARPC2_DROME]                     | 5.06  | 8.64     | 1          | 2                 | 2          | 2      | 1.909E7 | 301   | 35.1     | 7.91     |
| Q9VMU0    | CG8680, isoform A OS=Drosophila melanogaster GN=CG8680 PE=2 SV=1 - [Q9VMU0_DROME]                                             | 5.06  | 23.02    | 1          | 2                 | 2          | 2      | 3.762E7 | 126   | 14.3     | 8.57     |
| Q9VDE2    | CG5793 OS=Drosophila melanogaster GN=CG5793 PE=4 SV=2 - [Q9VDE2_DROME]                                                        | 5.04  | 10.53    | 1          | 2                 | 2          | 2      | 8.601E6 | 228   | 24.6     | 6.54     |
| Q9XZ19    | CG3909 OS=Drosophila melanogaster GN=CG3909 PE=2 SV=1 - [Q9XZ19_DROME]                                                        | 5.03  | 11.18    | 1          | 2                 | 2          | 3      | 1.078E7 | 331   | 36.1     | 5.25     |
| Q9VPQ2    | CG4164 OS=Drosophila melanogaster GN=CG4164 PE=2 SV=1 - [Q9VPQ2_DROME]                                                        | 5.03  | 12.43    | 1          | 3                 | 3          | 4      | 8.851E6 | 354   | 40.2     | 5.67     |
| Q9VP65    | Multifunctional methyltransferase subunit TRM112-like protein OS=Drosophila melanogaster GN=CG12975 PE=2 SV=1 - [TR112_DROME] | 5.03  | 11.29    | 1          | 1                 | 1          | 2      | 7.880E6 | 124   | 13.9     | 4.59     |
| Q7K0Q2    | LD41918p OS=Drosophila melanogaster GN=Ranbp11 PE=2 SV=1 - [Q7K0Q2_DROME]                                                     | 5.01  | 3.07     | 1          | 2                 | 2          | 2      | 6.513E6 | 1075  | 122.0    | 5.59     |



| Accession | Description                                                                                                         | Score | Coverage | # Proteins | # Unique Peptides | # Peptides | # PSMs | Area    | # AAs | MW [kDa] | calc. pI |
|-----------|---------------------------------------------------------------------------------------------------------------------|-------|----------|------------|-------------------|------------|--------|---------|-------|----------|----------|
| Q9VQR9    | CG17593, isoform A OS=Drosophila melanogaster GN=CG17593-RA PE=2 SV=1 - [Q9VQR9_DROME]                              | 5.00  | 5.88     | 1          | 2                 | 2          | 2      | 1.965E7 | 476   | 54.1     | 5.30     |
| Q9V813    | S-methyl-5'-thioadenosine phosphorylase OS=Drosophila melanogaster GN=Mtap PE=1 SV=1 - [MTAP_DROME]                 | 5.00  | 8.65     | 1          | 2                 | 2          | 2      | 3.918E7 | 289   | 32.0     | 6.43     |
| Q9VAL7    | Calnexin 99A, isoform A OS=Drosophila melanogaster GN=Cnx99A PE=2 SV=2 - [Q9VAL7_DROME]                             | 4.99  | 1.98     | 2          | 1                 | 1          | 2      | 3.607E7 | 605   | 68.0     | 4.84     |
| Q7K1Q7    | CG1381 OS=Drosophila melanogaster GN=RpLP0-like PE=2 SV=1 - [Q7K1Q7_DROME]                                          | 4.96  | 11.72    | 1          | 3                 | 3          | 4      | 8.295E7 | 256   | 29.4     | 5.12     |
| Q9VDY8    | MIP08680p OS=Drosophila melanogaster GN=vib PE=2 SV=1 - [Q9VDY8_DROME]                                              | 4.95  | 8.82     | 1          | 2                 | 2          | 2      | 5.809E7 | 272   | 31.3     | 6.06     |
| Q9VQI7    | CG3083-PA OS=Drosophila melanogaster GN=Prx6005 PE=4 SV=1 - [Q9VQI7_DROME]                                          | 4.93  | 13.51    | 1          | 2                 | 2          | 2      | 1.857E7 | 222   | 24.8     | 5.36     |
| X2J8I7    | Sorting nexin 1, isoform B OS=Drosophila melanogaster GN=Srx1 PE=4 SV=1 - [X2J8I7_DROME]                            | 4.93  | 8.33     | 2          | 3                 | 3          | 4      | 3.196E7 | 456   | 51.8     | 5.27     |
| Q9V470    | LD44970p OS=Drosophila melanogaster GN=Suchb PE=2 SV=1 - [Q9V470_DROME]                                             | 4.92  | 12.74    | 1          | 4                 | 4          | 4      | 1.672E7 | 416   | 45.0     | 6.01     |
| Q9VP25    | Esterase Q OS=Drosophila melanogaster GN=Est-Q PE=2 SV=1 - [Q9VP25_DROME]                                           | 4.91  | 8.41     | 1          | 1                 | 2          | 5      | 4.460E8 | 559   | 61.4     | 5.59     |
| Q9VXI3    | CG9911, isoform C OS=Drosophila melanogaster GN=CG9911 PE=4 SV=1 - [Q9VXI3_DROME]                                   | 4.90  | 8.80     | 2          | 3                 | 3          | 3      | 2.660E7 | 375   | 43.3     | 5.87     |
| O97064    | Ccp84Ag OS=Drosophila melanogaster GN=Ccp84Ag PE=4 SV=1 - [O97064_DROME]                                            | 4.89  | 21.47    | 1          | 2                 | 2          | 2      | 8.358E6 | 191   | 19.4     | 5.48     |
| P53034    | Replication factor C subunit 2 OS=Drosophila melanogaster GN=Rfc4 PE=2 SV=1 - [RFC2_DROME]                          | 4.88  | 6.34     | 1          | 3                 | 3          | 3      | 1.690E7 | 331   | 37.1     | 7.72     |
| Q9VCH5    | Nup98 OS=Drosophila melanogaster GN=Nup98-96 PE=4 SV=3 - [Q9VCH5_DROME]                                             | 4.88  | 2.55     | 1          | 3                 | 3          | 3      | 7.760E6 | 1960  | 210.0    | 6.52     |
| Q7JZM8    | 39S ribosomal protein L41, mitochondrial OS=Drosophila melanogaster GN=mRpl41 PE=2 SV=1 - [RM41_DROME]              | 4.86  | 12.65    | 1          | 1                 | 1          | 1      | 2.091E7 | 166   | 18.6     | 9.39     |
| M9MRR7    | Sh3beta, isoform C OS=Drosophila melanogaster GN=Sh3beta PE=4 SV=1 - [M9MRR7_DROME]                                 | 4.86  | 21.23    | 4          | 2                 | 2          | 2      | 4.264E7 | 146   | 16.2     | 4.50     |
| Q9VSS2    | Signal recognition particle subunit SRP68 OS=Drosophila melanogaster GN=Srp68 PE=2 SV=1 - [SRP68_DROME]             | 4.86  | 9.93     | 1          | 4                 | 4          | 4      | 1.774E7 | 604   | 69.0     | 8.47     |
| Q9VW26    | Ornithine aminotransferase, mitochondrial OS=Drosophila melanogaster GN=Oat PE=2 SV=1 - [OAT_DROME]                 | 4.85  | 6.50     | 1          | 3                 | 3          | 3      | 6.661E6 | 431   | 47.3     | 7.05     |
| Q9VVU5    | COP9 signalosome complex subunit 1b OS=Drosophila melanogaster GN=CSN1b PE=2 SV=1 - [CSN1_DROME]                    | 4.83  | 2.48     | 1          | 1                 | 1          | 2      | 4.958E7 | 525   | 58.2     | 6.83     |
| Q9VXX8    | Probable 60S ribosomal protein L37-A OS=Drosophila melanogaster GN=Rpl37a PE=1 SV=1 - [RL371_DROME]                 | 4.82  | 26.88    | 2          | 3                 | 3          | 4      | 2.695E8 | 93    | 10.6     | 11.69    |
| Q95TK5    | CG1635 OS=Drosophila melanogaster GN=CG1635 PE=2 SV=1 - [Q95TK5_DROME]                                              | 4.81  | 9.38     | 1          | 2                 | 2          | 2      |         | 448   | 51.1     | 9.06     |
| Q7K148    | Proteasome subunit beta type OS=Drosophila melanogaster GN=Prosbeta5 PE=2 SV=1 - [Q7K148_DROME]                     | 4.80  | 11.35    | 1          | 3                 | 3          | 4      | 2.382E8 | 282   | 31.1     | 6.93     |
| Q9VDI5    | CG17271, isoform A OS=Drosophila melanogaster GN=CG17271 PE=4 SV=2 - [Q9VDI5_DROME]                                 | 4.80  | 13.88    | 2          | 3                 | 3          | 3      | 6.383E6 | 281   | 32.5     | 6.37     |
| Q058X8    | Chorion protein b at 7F, isoform B OS=Drosophila melanogaster GN=Cp7Fb PE=2 SV=1 - [Q058X8_DROME]                   | 4.78  | 29.50    | 2          | 3                 | 3          | 3      | 2.173E7 | 139   | 15.1     | 8.91     |
| Q9W2N0    | F-actin-capping protein subunit alpha OS=Drosophila melanogaster GN=cpa PE=2 SV=1 - [CAPZA_DROME]                   | 4.78  | 11.19    | 1          | 2                 | 2          | 2      | 3.494E7 | 286   | 32.7     | 5.94     |
| Q7K1W9    | BcDNA.LD02793 OS=Drosophila melanogaster GN=Prp19 PE=2 SV=1 - [Q7K1W9_DROME]                                        | 4.77  | 9.70     | 1          | 4                 | 4          | 4      | 2.002E7 | 505   | 55.2     | 6.90     |
| Q7K550    | Eukaryotic translation initiation factor 3 subunit J OS=Drosophila melanogaster GN=Adam PE=1 SV=1 - [EIF3J_DROME]   | 4.77  | 18.22    | 1          | 3                 | 3          | 4      | 2.799E6 | 236   | 26.6     | 4.86     |
| Q9V3W0    | CG15261-PA OS=Drosophila melanogaster GN=UK114 PE=2 SV=1 - [Q9V3W0_DROME]                                           | 4.76  | 23.19    | 1          | 2                 | 2          | 3      | 3.506E7 | 138   | 14.9     | 7.81     |
| P25439    | ATP-dependent helicase brm OS=Drosophila melanogaster GN=brm PE=1 SV=2 - [BRM_DROME]                                | 4.75  | 1.28     | 3          | 2                 | 2          | 2      | 9.332E6 | 1638  | 185.0    | 7.56     |
| Q9VH64    | CG8507 OS=Drosophila melanogaster GN=CG8507 PE=2 SV=1 - [Q9VH64_DROME]                                              | 4.74  | 4.75     | 1          | 2                 | 2          | 3      | 9.877E7 | 379   | 44.6     | 8.15     |
| Q9VHC8    | CG8149 OS=Drosophila melanogaster GN=CG8149 PE=2 SV=1 - [Q9VHC8_DROME]                                              | 4.73  | 9.09     | 1          | 2                 | 2          | 2      | 5.425E7 | 308   | 32.9     | 6.24     |
| Q9W3X7    | CG3192, isoform A OS=Drosophila melanogaster GN=CG3192-RA PE=2 SV=1 - [Q9W3X7_DROME]                                | 4.73  | 16.57    | 1          | 2                 | 2          | 2      |         | 175   | 20.2     | 8.09     |
| Q9W4C3    | Ubiquitin carboxyl-terminal hydrolase OS=Drosophila melanogaster GN=CG4165 PE=2 SV=1 - [Q9W4C3_DROME]               | 4.71  | 3.29     | 1          | 2                 | 2          | 2      | 2.727E7 | 1126  | 121.4    | 6.58     |
| Q9VAK1    | Alphabet, isoform A OS=Drosophila melanogaster GN=alph PE=3 SV=1 - [Q9VAK1_DROME]                                   | 4.70  | 11.68    | 3          | 3                 | 3          | 4      | 3.720E7 | 368   | 40.9     | 5.30     |
| Q9V6Y3    | Probable 28S ribosomal protein S16, mitochondrial OS=Drosophila melanogaster GN=mRpS16 PE=2 SV=1 - [RT16_DROME]     | 4.70  | 17.83    | 1          | 1                 | 1          | 2      | 1.549E7 | 129   | 14.5     | 9.98     |
| P12982    | Serine/threonine-protein phosphatase alpha-2 isoform OS=Drosophila melanogaster GN=Pp1-87B PE=1 SV=1 - [PP12_DROME] | 4.70  | 12.25    | 5          | 3                 | 3          | 6      | 3.354E7 | 302   | 34.5     | 5.59     |
| Q27601    | Amidophosphoribosyltransferase OS=Drosophila melanogaster GN=Prat PE=1 SV=2 - [PUR1_DROME]                          | 4.69  | 6.78     | 1          | 2                 | 2          | 2      | 9.236E7 | 546   | 59.5     | 6.67     |
| A12656    | RE54322p OS=Drosophila melanogaster GN=vimar PE=2 SV=1 - [A12656_DROME]                                             | 4.67  | 4.73     | 2          | 1                 | 2          | 2      | 2.291E7 | 634   | 70.2     | 5.16     |
| Q7K3Z3    | GH01724p OS=Drosophila melanogaster GN=p47 PE=2 SV=1 - [Q7K3Z3_DROME]                                               | 4.66  | 28.99    | 1          | 7                 | 7          | 9      | 5.817E7 | 407   | 43.4     | 5.62     |
| P32392    | Actin-related protein 3 OS=Drosophila melanogaster GN=Arp3 PE=2 SV=3 - [ARP3_DROME]                                 | 4.63  | 5.74     | 1          | 2                 | 2          | 2      | 5.460E7 | 418   | 47.0     | 5.99     |
| Q9VU58    | Neuropeptide-like 2 OS=Drosophila melanogaster GN=Nplp2 PE=1 SV=1 - [NPLP2_DROME]                                   | 4.62  | 13.95    | 1          | 1                 | 1          | 2      | 3.592E7 | 86    | 9.4      | 5.40     |
| P52486    | Ubiquitin-conjugating enzyme E2-22 kDa OS=Drosophila melanogaster GN=UbcD4 PE=1 SV=2 - [UBCD4_DROME]                | 4.60  | 10.55    | 1          | 2                 | 2          | 5      | 4.813E7 | 199   | 22.5     | 5.47     |
| Q9VN93    | Putative cysteine proteinase CG12163 OS=Drosophila melanogaster GN=CG12163 PE=2 SV=2 - [CPR1_DROME]                 | 4.60  | 4.56     | 1          | 2                 | 2          | 4      | 1.431E7 | 614   | 68.9     | 7.01     |
| Q9VW13    | CG9330 OS=Drosophila melanogaster GN=CG9330-RA PE=2 SV=1 - [Q9VW13_DROME]                                           | 4.60  | 3.39     | 1          | 2                 | 2          | 2      | 1.296E7 | 708   | 79.4     | 6.30     |
| Q9VI56    | CG1943, isoform A OS=Drosophila melanogaster GN=CG1943 PE=2 SV=1 - [Q9VI56_DROME]                                   | 4.59  | 40.68    | 1          | 3                 | 3          | 4      | 4.092E7 | 118   | 12.4     | 9.44     |
| Q9VHA1    | Spermidine synthase, isoform A OS=Drosophila melanogaster GN=SpdS PE=3 SV=1 - [Q9VHA1_DROME]                        | 4.58  | 11.85    | 2          | 3                 | 3          | 3      | 1.135E7 | 287   | 32.3     | 5.78     |
| Q86BS3    | Chromator, isoform A OS=Drosophila melanogaster GN=Chro PE=2 SV=1 - [Q86BS3_DROME]                                  | 4.57  | 3.24     | 1          | 2                 | 2          | 2      | 1.529E7 | 926   | 101.0    | 7.17     |
| Q9VMH2    | CG5972-PA OS=Drosophila melanogaster GN=Arpc4 PE=1 SV=1 - [Q9VMH2_DROME]                                            | 4.54  | 6.55     | 1          | 1                 | 1          | 2      |         | 168   | 19.6     | 8.46     |
| P53997    | Protein SET OS=Drosophila melanogaster GN=Set PE=1 SV=2 - [SET_DROME]                                               | 4.53  | 12.64    | 1          | 2                 | 2          | 6      | 2.908E7 | 269   | 31.0     | 4.36     |
| Q9VMQ7    | Putative elongator complex protein 4 OS=Drosophila melanogaster GN=CG6907 PE=1 SV=1 - [ELP4_DROME]                  | 4.52  | 11.44    | 1          | 3                 | 3          | 3      | 1.207E7 | 437   | 48.7     | 5.88     |
| Q9VBU6    | CG11857, isoform A OS=Drosophila melanogaster GN=CG11857 PE=2 SV=1 - [Q9VBU6_DROME]                                 | 4.51  | 13.79    | 2          | 2                 | 2          | 2      | 2.961E7 | 203   | 23.7     | 9.41     |

| Accession | Description                                                                                                               | Score | Coverage | # Proteins | # Unique Peptides | # Peptides | # PSMs | Area    | # AAs | MW [kDa] | calc. pI |
|-----------|---------------------------------------------------------------------------------------------------------------------------|-------|----------|------------|-------------------|------------|--------|---------|-------|----------|----------|
| Q9VSI1    | CG7182, isoform A OS=Drosophila melanogaster GN=CG7182 PE=2 SV=2 - [Q9VSI1_DROME]                                         | 4.51  | 7.02     | 1          | 2                 | 2          | 3      | 2.877E7 | 513   | 56.8     | 5.33     |
| O18388    | Importin subunit beta OS=Drosophila melanogaster GN=Fs(2)Ket PE=2 SV=2 - [IMB_DROME]                                      | 4.49  | 3.28     | 1          | 2                 | 2          | 4      | 4.620E7 | 884   | 98.6     | 5.03     |
| Q9VVZ6    | CG12519, isoform A OS=Drosophila melanogaster GN=CG18294 PE=2 SV=2 - [Q9VVZ6_DROME]                                       | 4.48  | 16.03    | 2          | 1                 | 1          | 2      |         | 131   | 12.7     | 9.50     |
| P54367    | Casein kinase I isoform alpha OS=Drosophila melanogaster GN=Cktalpha PE=1 SV=1 - [KC1A_DROME]                             | 4.46  | 13.06    | 1          | 4                 | 4          | 4      | 4.714E7 | 337   | 39.5     | 9.38     |
| Q9VL68    | CG4598, isoform B OS=Drosophila melanogaster GN=CG4598 PE=2 SV=2 - [Q9VL68_DROME]                                         | 4.46  | 9.96     | 1          | 2                 | 2          | 2      | 4.303E7 | 281   | 31.0     | 9.23     |
| Q9XZ06    | Nucleoporin 93kD-1 OS=Drosophila melanogaster GN=Nup93-1 PE=2 SV=1 - [Q9XZ06_DROME]                                       | 4.45  | 1.34     | 1          | 1                 | 1          | 2      | 1.375E7 | 823   | 93.8     | 6.27     |
| Q9VKC8    | CG6756-PA, isoform A OS=Drosophila melanogaster GN=Tom70 PE=2 SV=2 - [Q9VKC8_DROME]                                       | 4.45  | 9.17     | 1          | 4                 | 4          | 4      | 3.462E8 | 589   | 66.3     | 6.21     |
| Q8MLS2    | CG30410 OS=Drosophila melanogaster GN=Rpi PE=4 SV=3 - [Q8MLS2_DROME]                                                      | 4.45  | 19.92    | 1          | 4                 | 4          | 6      | 7.989E7 | 241   | 26.5     | 5.88     |
| Q9VX08    | CG6769, isoform A OS=Drosophila melanogaster GN=CG6769 PE=2 SV=1 - [Q9VX08_DROME]                                         | 4.45  | 9.05     | 1          | 3                 | 3          | 4      | 1.897E7 | 409   | 47.0     | 6.44     |
| Q9VXP3    | GH05406p OS=Drosophila melanogaster GN=mRpS30 PE=2 SV=1 - [Q9VXP3_DROME]                                                  | 4.40  | 5.21     | 1          | 2                 | 2          | 2      | 7.952E7 | 557   | 65.1     | 8.47     |
| Q9VCX3    | Probable 39S ribosomal protein L45, mitochondrial OS=Drosophila melanogaster GN=mRpL45 PE=2 SV=1 - [RM45_DROME]           | 4.39  | 8.31     | 1          | 2                 | 2          | 2      | 3.000E7 | 361   | 41.6     | 9.23     |
| Q9V460    | Transcription elongation factor SPT5 OS=Drosophila melanogaster GN=Spt5 PE=1 SV=1 - [SPT5H_DROME]                         | 4.38  | 5.01     | 1          | 3                 | 3          | 3      |         | 1078  | 119.4    | 6.25     |
| Q9VYD7    | Mitochondrial import inner membrane translocase subunit Tim9 OS=Drosophila melanogaster GN=Tim9a PE=3 SV=1 - [TIM9_DROME] | 4.38  | 16.84    | 1          | 1                 | 1          | 1      | 1.092E8 | 95    | 11.1     | 6.09     |
| Q961V3    | CG2246, isoform D OS=Drosophila melanogaster GN=CG2246 PE=2 SV=1 - [Q961V3_DROME]                                         | 4.36  | 11.17    | 4          | 3                 | 3          | 3      | 2.190E7 | 367   | 40.5     | 7.52     |
| Q8IQW2    | CG14235-PB, isoform B OS=Drosophila melanogaster GN=CoV1b PE=2 SV=1 - [Q8IQW2_DROME]                                      | 4.36  | 37.66    | 2          | 3                 | 3          | 8      | 5.816E7 | 77    | 9.3      | 8.47     |
| Q9VCB9    | CG5515, isoform A OS=Drosophila melanogaster GN=CG5515-RA PE=2 SV=1 - [Q9VCB9_DROME]                                      | 4.34  | 15.16    | 1          | 2                 | 2          | 3      |         | 244   | 28.5     | 4.34     |
| Q8I937    | CG32409 OS=Drosophila melanogaster GN=CG32409 PE=4 SV=2 - [Q8I937_DROME]                                                  | 4.34  | 12.61    | 1          | 3                 | 3          | 3      | 4.437E6 | 349   | 39.4     | 9.92     |
| Q9VCE3    | Rox8, isoform B OS=Drosophila melanogaster GN=Rox8 PE=4 SV=1 - [Q9VCE3_DROME]                                             | 4.34  | 4.96     | 2          | 2                 | 2          | 2      | 1.070E7 | 464   | 49.5     | 7.85     |
| Q7KV27    | CG1640, isoform A OS=Drosophila melanogaster GN=CG1640 PE=4 SV=1 - [Q7KV27_DROME]                                         | 4.33  | 3.87     | 2          | 2                 | 2          | 3      | 5.208E7 | 568   | 63.1     | 8.94     |
| A1Z892    | LD11278p OS=Drosophila melanogaster GN=Prx2540-1 PE=2 SV=1 - [A1Z892_DROME]                                               | 4.32  | 29.55    | 3          | 4                 | 4          | 4      | 1.571E7 | 220   | 24.8     | 6.43     |
| Q9VHK6    | CG9836 OS=Drosophila melanogaster GN=CG9836 PE=2 SV=1 - [Q9VHK6_DROME]                                                    | 4.30  | 20.13    | 1          | 2                 | 2          | 2      | 1.141E7 | 154   | 16.7     | 9.39     |
| Q9W277    | Vacuolar protein sorting-associated protein 35 OS=Drosophila melanogaster GN=Vps35 PE=2 SV=4 - [Q9W277_DROME]             | 4.29  | 4.62     | 2          | 3                 | 3          | 3      | 2.206E7 | 822   | 93.1     | 5.47     |
| Q7KKH3    | Protein SDA1 homolog OS=Drosophila melanogaster GN=Mys45A PE=1 SV=1 - [SDA1_DROME]                                        | 4.27  | 5.34     | 1          | 3                 | 3          | 3      | 1.360E7 | 712   | 81.9     | 6.76     |
| Q9VHY6    | CG2943 OS=Drosophila melanogaster GN=CG2943 PE=2 SV=1 - [Q9VHY6_DROME]                                                    | 4.27  | 2.30     | 1          | 2                 | 2          | 2      |         | 915   | 100.9    | 8.13     |
| Q9VBP9    | Nuclear protein localization protein 4 homolog OS=Drosophila melanogaster GN=Npl4 PE=1 SV=3 - [NPL4_DROME]                | 4.26  | 3.99     | 1          | 2                 | 2          | 2      | 2.148E7 | 652   | 73.3     | 7.24     |
| Q9VWB8    | Nucleoporin 205kD, isoform A OS=Drosophila melanogaster GN=Nup205 PE=4 SV=2 - [Q9VWB8_DROME]                              | 4.25  | 1.06     | 2          | 2                 | 2          | 4      | 1.750E7 | 2067  | 232.6    | 6.67     |
| M9PBQ4    | Apoptosis inducing factor, isoform C OS=Drosophila melanogaster GN=AIF PE=4 SV=1 - [M9PBQ4_DROME]                         | 4.23  | 3.12     | 2          | 2                 | 2          | 2      | 3.856E7 | 738   | 81.1     | 6.20     |
| P18431    | Protein kinase shaggy OS=Drosophila melanogaster GN=sgg PE=1 SV=3 - [SGG_DROME]                                           | 4.22  | 8.17     | 8          | 3                 | 3          | 4      | 2.095E7 | 514   | 53.8     | 8.75     |
| Q9VN51    | Transforming acidic coiled-coil protein, isoform B OS=Drosophila melanogaster GN=tacc PE=4 SV=2 - [Q9VN51_DROME]          | 4.22  | 5.04     | 5          | 4                 | 4          | 5      | 2.645E7 | 1190  | 132.3    | 5.02     |
| A1Z992    | CG33138 OS=Drosophila melanogaster GN=AGBE PE=4 SV=1 - [A1Z992_DROME]                                                     | 4.21  | 3.94     | 1          | 2                 | 2          | 2      | 1.087E7 | 685   | 79.1     | 6.25     |
| Q8IP62    | Mitochondrial ribosomal protein S23 OS=Drosophila melanogaster GN=mRpS23 PE=4 SV=1 - [Q8IP62_DROME]                       | 4.17  | 8.99     | 1          | 1                 | 1          | 2      | 1.169E7 | 189   | 21.5     | 5.73     |
| P54622    | Single-stranded DNA-binding protein, mitochondrial OS=Drosophila melanogaster GN=mtSSB PE=1 SV=2 - [SSBP_DROME]           | 4.11  | 9.59     | 1          | 1                 | 1          | 3      | 1.586E8 | 146   | 16.4     | 9.85     |
| Q8SX57    | CG31549 OS=Drosophila melanogaster GN=CG11005 PE=2 SV=1 - [Q8SX57_DROME]                                                  | 4.10  | 10.12    | 1          | 2                 | 3          | 4      | 1.843E7 | 257   | 26.9     | 7.09     |
| Q9VE85    | CG7671 OS=Drosophila melanogaster GN=Nup43 PE=4 SV=1 - [Q9VE85_DROME]                                                     | 4.10  | 8.38     | 1          | 2                 | 2          | 2      |         | 358   | 40.1     | 5.22     |
| Q8IP18    | RH52721p OS=Drosophila melanogaster GN=Tpr2 PE=2 SV=1 - [Q8IP18_DROME]                                                    | 4.09  | 10.13    | 3          | 3                 | 3          | 3      | 7.745E6 | 464   | 53.2     | 8.38     |
| Q9V3F8    | Pyroline-5-carboxylate reductase OS=Drosophila melanogaster GN=P5cr PE=3 SV=1 - [Q9V3F8_DROME]                            | 4.08  | 5.71     | 1          | 1                 | 1          | 1      | 2.319E7 | 280   | 29.6     | 7.44     |
| O44226    | Elongin B OS=Drosophila melanogaster GN=EloB PE=1 SV=1 - [O44226_DROME]                                                   | 4.08  | 15.25    | 1          | 2                 | 2          | 2      | 4.249E7 | 118   | 13.2     | 4.50     |
| Q9VL96    | Pescadillo homolog OS=Drosophila melanogaster GN=CG4364 PE=1 SV=1 - [PESC_DROME]                                          | 4.07  | 3.35     | 1          | 2                 | 2          | 2      | 4.518E7 | 627   | 73.8     | 7.08     |
| Q5KTT4    | NAT1, isoform C (Fragment) OS=Drosophila melanogaster GN=NAT1 PE=2 SV=1 - [Q5KTT4_DROME]                                  | 4.05  | 3.01     | 2          | 3                 | 3          | 4      | 2.168E7 | 1526  | 166.8    | 8.81     |
| Q9VDV2    | AT06125p OS=Drosophila melanogaster GN=CG6195 PE=2 SV=1 - [Q9VDV2_DROME]                                                  | 4.04  | 5.23     | 1          | 2                 | 2          | 4      | 1.639E7 | 363   | 40.6     | 8.57     |
| Q9V9U7    | CG1890 OS=Drosophila melanogaster GN=CG1890 PE=2 SV=1 - [Q9V9U7_DROME]                                                    | 4.04  | 14.55    | 1          | 1                 | 1          | 1      | 1.545E7 | 110   | 12.9     | 5.71     |
| Q9VV72    | CG4123-PA, isoform A OS=Drosophila melanogaster GN=Mipp1 PE=2 SV=2 - [Q9VV72_DROME]                                       | 4.04  | 9.85     | 1          | 3                 | 3          | 4      | 1.057E7 | 467   | 53.5     | 6.74     |
| Q9W402    | CG3446, isoform B OS=Drosophila melanogaster GN=CG3446 PE=2 SV=1 - [Q9W402_DROME]                                         | 4.01  | 17.53    | 1          | 2                 | 2          | 4      | 1.551E7 | 154   | 17.7     | 9.39     |
| Q9VL71    | LD29830p OS=Drosophila melanogaster GN=Srp54 PE=2 SV=1 - [Q9VL71_DROME]                                                   | 3.98  | 4.87     | 1          | 2                 | 2          | 2      | 1.355E7 | 513   | 58.3     | 11.33    |
| Q9VUZ8    | CG13072-PA OS=Drosophila melanogaster GN=PCDC-5 PE=2 SV=1 - [Q9VUZ8_DROME]                                                | 3.96  | 18.05    | 1          | 2                 | 2          | 2      | 3.553E7 | 133   | 15.1     | 5.36     |
| Q9VDP9    | CG4390, isoform A OS=Drosophila melanogaster GN=CG4390 PE=2 SV=1 - [Q9VDP9_DROME]                                         | 3.96  | 4.55     | 2          | 1                 | 1          | 1      | 5.993E7 | 286   | 31.4     | 5.83     |
| M9PBA6    | CG5446, isoform B OS=Drosophila melanogaster GN=CG5446 PE=4 SV=1 - [M9PBA6_DROME]                                         | 3.94  | 22.50    | 2          | 1                 | 1          | 1      | 1.809E7 | 80    | 9.1      | 4.26     |
| Q8T060    | CG12304, isoform B OS=Drosophila melanogaster GN=CG12304-RB PE=2 SV=3 - [Q8T060_DROME]                                    | 3.91  | 18.94    | 2          | 5                 | 5          | 5      | 2.615E7 | 301   | 33.2     | 8.62     |
| Q9VRV8    | FI21453p1 OS=Drosophila melanogaster GN=Trn PE=2 SV=1 - [Q9VRV8_DROME]                                                    | 3.88  | 2.35     | 1          | 2                 | 2          | 3      | 7.326E6 | 893   | 101.5    | 5.07     |
| A4V4U5    | Sluggish A, isoform F OS=Drosophila melanogaster GN=slgA PE=4 SV=1 - [A4V4U5_DROME]                                       | 3.87  | 1.79     | 4          | 1                 | 1          | 2      |         | 669   | 75.9     | 8.91     |

| Accession | Description                                                                                                                            | Score | Coverage | # Proteins | # Unique Peptides | # Peptides | # PSMs | Area    | # AAs | MW [kDa] | calc. pI |
|-----------|----------------------------------------------------------------------------------------------------------------------------------------|-------|----------|------------|-------------------|------------|--------|---------|-------|----------|----------|
| Q8ML70    | Immune-induced peptides OS=Drosophila melanogaster GN=IM10 PE=1 SV=2 - [IM10_DROME]                                                    | 3.87  | 6.72     | 1          | 1                 | 1          | 1      | 1.054E7 | 268   | 29.1     | 10.92    |
| Q9V431    | Apoptosis inhibitor 5 homolog OS=Drosophila melanogaster GN=Aac11 PE=2 SV=1 - [API5_DROME]                                             | 3.86  | 4.48     | 1          | 2                 | 2          | 2      | 6.198E7 | 536   | 59.9     | 6.76     |
| Q9V115    | CG10286 OS=Drosophila melanogaster GN=CG10286 PE=2 SV=1 - [Q9V115_DROME]                                                               | 3.85  | 2.24     | 1          | 1                 | 1          | 4      | 1.896E7 | 625   | 69.1     | 4.83     |
| Q7KXV5    | VAMP-associated protein of 33kDa ortholog A, isoform A OS=Drosophila melanogaster GN=Vap-33A PE=4 SV=1 - [Q7KXV5_DROME]                | 3.84  | 15.32    | 2          | 3                 | 3          | 6      | 7.120E7 | 235   | 26.8     | 8.38     |
| Q9W266    | FI21560p1 OS=Drosophila melanogaster GN=wdp PE=2 SV=1 - [Q9W266_DROME]                                                                 | 3.84  | 2.81     | 1          | 1                 | 1          | 1      | 677     | 74.7  | 5.39     |          |
| Q9VG33    | Sulfurtransferase OS=Drosophila melanogaster GN=CG12279 PE=2 SV=2 - [Q9VG33_DROME]                                                     | 3.84  | 26.36    | 1          | 2                 | 2          | 2      | 2.840E7 | 110   | 12.1     | 5.21     |
| Q7K738    | EG-52C10.4 protein OS=Drosophila melanogaster GN=Ubc10 PE=2 SV=1 - [Q7K738_DROME]                                                      | 3.82  | 14.94    | 1          | 2                 | 2          | 3      | 3.251E7 | 154   | 17.9     | 8.56     |
| Q9VPE2    | CG6020, isoform A OS=Drosophila melanogaster GN=CG6020-RA PE=2 SV=1 - [Q9VPE2_DROME]                                                   | 3.80  | 9.86     | 1          | 4                 | 4          | 5      | 3.748E7 | 416   | 46.8     | 9.39     |
| Q81PB9    | CG31716-PG, isoform G OS=Drosophila melanogaster GN=Cnot4 PE=4 SV=1 - [Q81PB9_DROME]                                                   | 3.79  | 2.58     | 6          | 2                 | 2          | 2      | 1.745E7 | 1047  | 116.1    | 6.67     |
| Q5BI50    | Cullin-4, isoform A OS=Drosophila melanogaster GN=Cul4 PE=2 SV=1 - [Q5BI50_DROME]                                                      | 3.78  | 2.56     | 1          | 2                 | 2          | 2      | 4.719E7 | 821   | 94.3     | 8.66     |
| Q9U5L1    | Signal recognition particle receptor subunit alpha homolog OS=Drosophila melanogaster GN=Gtp-bp PE=1 SV=2 - [SRPR_DROME]               | 3.78  | 3.58     | 1          | 2                 | 2          | 2      | 2.386E7 | 614   | 67.8     | 6.83     |
| Q9VF03    | Brahma associated protein 155 kDa OS=Drosophila melanogaster GN=mor PE=2 SV=3 - [Q9VF03_DROME]                                         | 3.71  | 1.32     | 1          | 1                 | 1          | 1      | 2.219E7 | 1209  | 131.3    | 5.73     |
| Q9VPL0    | CG3436, isoform A OS=Drosophila melanogaster GN=CG3436 PE=2 SV=1 - [Q9VPL0_DROME]                                                      | 3.69  | 3.75     | 1          | 1                 | 1          | 1      | 2.011E7 | 347   | 38.8     | 6.92     |
| Q7KVQ7    | Transport and golgi organization 5, isoform B OS=Drosophila melanogaster GN=Tango5 PE=4 SV=1 - [Q7KVQ7_DROME]                          | 3.68  | 3.04     | 2          | 1                 | 1          | 1      | 3.485E7 | 428   | 47.9     | 9.69     |
| Q7KIN0    | Toll-7 OS=Drosophila melanogaster GN=Toll-7 PE=2 SV=1 - [Q7KIN0_DROME]                                                                 | 3.67  | 2.63     | 1          | 1                 | 1          | 1      | 1.980E7 | 1446  | 160.8    | 6.61     |
| Q95RX5    | CG11984, isoform D OS=Drosophila melanogaster GN=CG11984 PE=2 SV=1 - [Q95RX5_DROME]                                                    | 3.66  | 1.84     | 1          | 1                 | 1          | 1      | 1.132E7 | 599   | 62.4     | 5.72     |
| Q9VXP4    | Platelet-activating factor acetylhydrolase IB subunit beta homolog OS=Drosophila melanogaster GN=Paf-AHalpha PE=1 SV=1 - [PA1B2_DROME] | 3.66  | 16.89    | 1          | 3                 | 3          | 3      | 5.619E7 | 225   | 25.4     | 5.81     |
| Q9VMS1    | CG14028-PA OS=Drosophila melanogaster GN=cype PE=4 SV=3 - [Q9VMS1_DROME]                                                               | 3.65  | 11.69    | 1          | 1                 | 1          | 3      | 9.092E7 | 77    | 8.3      | 9.92     |
| Q9VGK3    | Peptidyl-prolyl cis-trans isomerase OS=Drosophila melanogaster GN=CG14715 PE=2 SV=1 - [Q9VGK3_DROME]                                   | 3.64  | 13.77    | 1          | 1                 | 1          | 2      | 5.149E6 | 138   | 14.8     | 8.59     |
| M9NF33    | CG7185, isoform B OS=Drosophila melanogaster GN=CG7185 PE=4 SV=1 - [M9NF33_DROME]                                                      | 3.63  | 2.48     | 2          | 1                 | 1          | 1      | 5.622E6 | 605   | 66.1     | 9.50     |
| O77430    | HL01263p OS=Drosophila melanogaster GN=skpA PE=1 SV=1 - [O77430_DROME]                                                                 | 3.62  | 11.11    | 1          | 2                 | 2          | 2      | 4.849E6 | 162   | 18.6     | 4.65     |
| Q9VBT4    | CG6463-PA OS=Drosophila melanogaster GN=CG6463 PE=2 SV=2 - [Q9VBT4_DROME]                                                              | 3.62  | 10.48    | 1          | 1                 | 1          | 2      | 9.023E6 | 124   | 13.8     | 9.39     |
| Q24583    | V-type proton ATPase subunit F 1 OS=Drosophila melanogaster GN=Vha14-1 PE=1 SV=1 - [VATF1_DROME]                                       | 3.61  | 8.06     | 1          | 1                 | 1          | 2      | 1.052E7 | 124   | 13.8     | 6.38     |
| Q9V6X7    | GDP-fucose protein O-fucosyltransferase 1 OS=Drosophila melanogaster GN=O-fut1 PE=1 SV=1 - [OFUT1_DROME]                               | 3.60  | 6.47     | 1          | 1                 | 1          | 1      | 1.024E7 | 402   | 46.8     | 7.72     |
| Q9V9S0    | CG3305-PA OS=Drosophila melanogaster GN=Lamp1 PE=2 SV=3 - [Q9V9S0_DROME]                                                               | 3.56  | 3.46     | 1          | 1                 | 1          | 1      | 5.561E7 | 318   | 34.8     | 6.11     |
| P26308    | Guanine nucleotide-binding protein subunit beta-1 OS=Drosophila melanogaster GN=Gbeta13F PE=1 SV=1 - [GBB1_DROME]                      | 3.54  | 15.29    | 1          | 2                 | 2          | 2      | 8.701E6 | 340   | 37.1     | 6.44     |
| Q8SYL1    | Lethal (2) 09851 OS=Drosophila melanogaster GN=(2)09851 PE=2 SV=1 - [Q8SYL1_DROME]                                                     | 3.54  | 3.73     | 1          | 2                 | 2          | 2      | 9.951E6 | 456   | 50.7     | 4.69     |
| Q9V7D2    | V-type proton ATPase subunit D 1 OS=Drosophila melanogaster GN=Vha36-1 PE=2 SV=1 - [VATD1_DROME]                                       | 3.53  | 16.26    | 1          | 2                 | 2          | 2      | 3.849E7 | 246   | 27.6     | 9.54     |
| Q9VKU3    | CG6094 protein OS=Drosophila melanogaster GN=CG6094 PE=2 SV=1 - [Q9VKU3_DROME]                                                         | 3.52  | 7.39     | 1          | 1                 | 1          | 1      | 8.166E6 | 203   | 22.8     | 10.33    |
| Q9VDE5    | Protein Peter pan OS=Drosophila melanogaster GN=ppan PE=1 SV=1 - [PPAN_DROME]                                                          | 3.51  | 1.52     | 1          | 1                 | 1          | 2      | 2.231E6 | 460   | 53.1     | 9.76     |
| Q9VNL6    | CG7627, isoform B OS=Drosophila melanogaster GN=CG7627-RA PE=2 SV=2 - [Q9VNL6_DROME]                                                   | 3.48  | 1.99     | 1          | 2                 | 2          | 2      |         | 1355  | 152.2    | 7.34     |
| Q8MSC4    | CG3509 OS=Drosophila melanogaster GN=BigH1 PE=2 SV=1 - [Q8MSC4_DROME]                                                                  | 3.47  | 13.03    | 1          | 3                 | 3          | 3      | 2.306E7 | 353   | 38.6     | 9.41     |
| Q7JZK1    | CG7712 OS=Drosophila melanogaster GN=CG7712 PE=2 SV=1 - [Q7JZK1_DROME]                                                                 | 3.47  | 10.48    | 1          | 1                 | 1          | 2      | 3.666E7 | 124   | 14.9     | 9.50     |
| Q9VEY5    | CG5903 OS=Drosophila melanogaster GN=CG5903 PE=2 SV=1 - [Q9VEY5_DROME]                                                                 | 3.45  | 7.52     | 1          | 1                 | 1          | 1      | 1.045E7 | 226   | 24.5     | 8.78     |
| Q9VRX6    | Innexin inx4 OS=Drosophila melanogaster GN=zpg PE=2 SV=1 - [INX4_DROME]                                                                | 3.41  | 5.72     | 1          | 2                 | 2          | 2      | 7.708E6 | 367   | 42.8     | 8.97     |
| Q8SY77    | CG3566-PC, isoform C OS=Drosophila melanogaster GN=CG3566 PE=2 SV=1 - [Q8SY77_DROME]                                                   | 3.40  | 13.48    | 3          | 1                 | 1          | 1      | 2.185E7 | 89    | 10.0     | 6.80     |
| Q9XZ53    | Translation machinery-associated protein 7 homolog OS=Drosophila melanogaster GN=CG13364 PE=4 SV=1 - [TMA7_DROME]                      | 3.40  | 15.63    | 1          | 1                 | 1          | 4      | 1.375E7 | 64    | 6.9      | 9.99     |
| Q9VA73    | Calcium-binding mitochondrial carrier protein Aralar1 OS=Drosophila melanogaster GN=alarar1 PE=2 SV=1 - [CMC_DROME]                    | 3.39  | 5.04     | 1          | 3                 | 3          | 4      | 3.889E7 | 695   | 76.7     | 8.72     |
| E8NH77    | SD15168p OS=Drosophila melanogaster GN=sw-RA PE=2 SV=1 - [E8NH77_DROME]                                                                | 3.38  | 3.79     | 10         | 2                 | 2          | 2      | 2.267E7 | 634   | 70.2     | 5.38     |
| Q9VV39    | Mitochondrial ribosomal protein S34 OS=Drosophila melanogaster GN=mRpS34 PE=2 SV=2 - [Q9VV39_DROME]                                    | 3.37  | 7.98     | 1          | 1                 | 1          | 2      |         | 188   | 21.6     | 9.52     |
| Q9VZ34    | CG2076, isoform A OS=Drosophila melanogaster GN=CG2076 PE=2 SV=1 - [Q9VZ34_DROME]                                                      | 3.36  | 2.64     | 1          | 1                 | 1          | 1      | 3.356E7 | 341   | 35.8     | 9.96     |
| Q9VDZ4    | CG42358 OS=Drosophila melanogaster GN=CG42358 PE=2 SV=1 - [Q9VDZ4_DROME]                                                               | 3.35  | 3.00     | 1          | 1                 | 1          | 1      | 1.122E7 | 433   | 49.2     | 8.78     |
| Q9VN56    | CG14655 OS=Drosophila melanogaster GN=CG14655 PE=2 SV=1 - [Q9VN56_DROME]                                                               | 3.33  | 8.57     | 1          | 1                 | 1          | 1      |         | 525   | 58.0     | 8.29     |
| Q9VGZ2    | FI06805p OS=Drosophila melanogaster GN=Rrp46 PE=2 SV=3 - [Q9VGZ2_DROME]                                                                | 3.33  | 7.73     | 1          | 1                 | 1          | 1      | 6.067E6 | 233   | 25.7     | 5.33     |
| Q9VZD8    | THUMP domain-containing protein 1 homolog OS=Drosophila melanogaster GN=CG15014 PE=1 SV=2 - [THUM1_DROME]                              | 3.33  | 4.63     | 1          | 1                 | 1          | 1      |         | 324   | 36.2     | 5.83     |
| M9PB19    | Sallimus, isoform S OS=Drosophila melanogaster GN=sls PE=4 SV=1 - [M9PB19_DROME]                                                       | 3.33  | 2.29     | 12         | 2                 | 2          | 3      | 1.118E8 | ###   | 1758.8   | 5.00     |
| Q9VB23    | BcDNA.LD34343 OS=Drosophila melanogaster GN=wdb PE=2 SV=2 - [Q9VB23_DROME]                                                             | 3.31  | 7.44     | 8          | 3                 | 3          | 3      | 2.294E7 | 524   | 59.7     | 7.49     |
| Q9VUB8    | CG6513-PA, isoform A OS=Drosophila melanogaster GN=endos PE=2 SV=1 - [Q9VUB8_DROME]                                                    | 3.28  | 22.69    | 1          | 2                 | 2          | 4      | 2.856E7 | 119   | 12.9     | 8.63     |
| Q9VWS2    | Nucleoporin NUP53 OS=Drosophila melanogaster GN=CG6540 PE=2 SV=1 - [Q9VWS2_DROME]                                                      | 3.27  | 5.74     | 1          | 1                 | 1          | 1      |         | 331   | 35.1     | 9.00     |
| Q9VN95    | Enolase-phosphatase E1 OS=Drosophila melanogaster GN=CG12173 PE=1 SV=2 - [ENOPH_DROME]                                                 | 3.25  | 4.69     | 1          | 1                 | 1          | 1      | 1.568E7 | 256   | 28.3     | 6.07     |

| Accession | Description                                                                                                                  | Score | Coverage | # Proteins | # Unique Peptides | # Peptides | # PSMs | Area    | # AAs | MW [kDa] | calc. pI |
|-----------|------------------------------------------------------------------------------------------------------------------------------|-------|----------|------------|-------------------|------------|--------|---------|-------|----------|----------|
| Q9W4D2    | RNA-binding protein 4F OS=Drosophila melanogaster GN=Rnp4F PE=1 SV=1 - [RNP4F_DROME]                                         | 3.24  | 1.91     | 2          | 2                 | 2          | 2      | 1.320E7 | 941   | 106.7    | 5.11     |
| Q7JQN4    | LD15481p OS=Drosophila melanogaster GN=Rs1 PE=2 SV=1 - [Q7JQN4_DROME]                                                        | 3.23  | 1.53     | 1          | 1                 | 1          | 1      |         | 782   | 87.8     | 9.47     |
| Q9VCA8    | Ankyrin repeat and KH domain-containing protein mask OS=Drosophila melanogaster GN=mask PE=1 SV=2 - [ANKHM_DROME]            | 3.23  | 1.82     | 1          | 3                 | 3          | 3      |         | 4001  | 422.9    | 5.68     |
| Q94529    | Probable pseudouridine-5'-monophosphatase OS=Drosophila melanogaster GN=Gs11 PE=2 SV=2 - [GS1_DROME]                         | 3.22  | 5.63     | 1          | 1                 | 1          | 1      | 4.018E7 | 231   | 25.8     | 6.00     |
| P14199    | Protein ref(2)P OS=Drosophila melanogaster GN=ref(2)P PE=1 SV=2 - [REF2P_DROME]                                              | 3.20  | 1.67     | 1          | 1                 | 1          | 1      | 9.459E6 | 599   | 65.3     | 4.98     |
| P11584    | Integrin beta-PS OS=Drosophila melanogaster GN=mys PE=1 SV=3 - [ITBX_DROME]                                                  | 3.19  | 1.89     | 2          | 1                 | 1          | 1      | 7.058E6 | 846   | 92.6     | 5.97     |
| Q9W4Z1    | EG:BACH48C10.5 protein OS=Drosophila melanogaster GN=ptr PE=2 SV=2 - [Q9W4Z1_DROME]                                          | 3.18  | 1.86     | 2          | 1                 | 1          | 1      |         | 1234  | 132.8    | 8.69     |
| Q9V5S2    | AT11423p OS=Drosophila melanogaster GN=CG14834 PE=2 SV=1 - [Q9V5S2_DROME]                                                    | 3.18  | 3.44     | 1          | 1                 | 1          | 1      | 1.341E8 | 407   | 46.0     | 10.24    |
| Q9VK89    | Probable tRNA (guanine(26)-N(2))-dimethyltransferase OS=Drosophila melanogaster GN=CG6388 PE=2 SV=1 - [TRM1_DROME]           | 3.18  | 1.90     | 1          | 1                 | 1          | 1      | 1.665E7 | 578   | 64.9     | 7.21     |
| Q9W124    | CG4806 OS=Drosophila melanogaster GN=CG4806 PE=2 SV=2 - [Q9W124_DROME]                                                       | 3.16  | 2.74     | 1          | 1                 | 1          | 1      | 1.303E7 | 657   | 75.0     | 9.51     |
| Q7JUY7    | PTB domain-containing adapter protein ced-6 OS=Drosophila melanogaster GN=ced-6 PE=1 SV=1 - [CED6_DROME]                     | 3.14  | 3.09     | 1          | 1                 | 1          | 1      | 1.357E7 | 517   | 56.1     | 6.87     |
| Q24311    | Cullin homolog 1 OS=Drosophila melanogaster GN=lin19 PE=1 SV=2 - [CUL1_DROME]                                                | 3.10  | 1.94     | 1          | 1                 | 1          | 1      |         | 774   | 89.5     | 7.90     |
| Q9W255    | GH05812p OS=Drosophila melanogaster GN=qkr58E-1 PE=2 SV=1 - [Q9W255_DROME]                                                   | 3.09  | 6.31     | 1          | 1                 | 1          | 1      | 7.270E6 | 396   | 45.4     | 9.07     |
| Q9VGJ9    | Heme oxygenase OS=Drosophila melanogaster GN=Ho PE=2 SV=1 - [Q9VGJ9_DROME]                                                   | 3.07  | 6.76     | 1          | 1                 | 1          | 1      | 9.031E6 | 296   | 34.1     | 5.80     |
| P08266    | DNA-directed RNA polymerase II subunit RPB2 OS=Drosophila melanogaster GN=RpII140 PE=2 SV=2 - [RPB2_DROME]                   | 3.06  | 2.21     | 1          | 1                 | 1          | 1      |         | 1176  | 134.0    | 7.05     |
| Q9W1G0    | Probable transaldolase OS=Drosophila melanogaster GN=Tal PE=2 SV=2 - [TALDO_DROME]                                           | 3.06  | 7.55     | 1          | 2                 | 2          | 4      | 2.533E7 | 331   | 36.7     | 7.71     |
| Q9V6B9    | Probable nucleoporin Nup54 OS=Drosophila melanogaster GN=Nup54 PE=2 SV=1 - [NUP54_DROME]                                     | 3.04  | 1.64     | 1          | 1                 | 1          | 1      | 4.062E7 | 610   | 64.4     | 8.59     |
| Q9VIH1    | CG9273 protein OS=Drosophila melanogaster GN=RPA2 PE=1 SV=2 - [Q9VIH1_DROME]                                                 | 3.03  | 22.36    | 1          | 3                 | 3          | 3      | 6.781E7 | 246   | 26.4     | 5.08     |
| Q7K2D2    | Probable dynactin subunit 2 OS=Drosophila melanogaster GN=Dmn PE=1 SV=1 - [DCTN2_DROME]                                      | 3.01  | 9.21     | 1          | 2                 | 2          | 2      | 1.983E6 | 380   | 42.0     | 5.26     |
| Q9VKK1    | Enhancer of mRNA-decapping protein 4 homolog OS=Drosophila melanogaster GN=Ge-1 PE=1 SV=2 - [EDC4_DROME]                     | 3.01  | 1.03     | 1          | 1                 | 1          | 1      |         | 1354  | 149.2    | 5.90     |
| Q9W415    | tRNA (guanine-N(7))-methyltransferase non-catalytic subunit wuho OS=Drosophila melanogaster GN=wuho PE=2 SV=1 - [WUHO_DROME] | 3.00  | 7.08     | 1          | 1                 | 1          | 1      | 2.107E7 | 424   | 46.5     | 5.34     |
| Q81R93    | CG1938-PB, isoform B OS=Drosophila melanogaster GN=Dlic PE=4 SV=1 - [Q81R93_DROME]                                           | 3.00  | 8.79     | 2          | 2                 | 2          | 2      | 1.916E7 | 398   | 44.2     | 6.13     |
| X2JD07    | Lethal (1) G0020, isoform B OS=Drosophila melanogaster GN=(1)G0020 PE=4 SV=1 - [X2JD07_DROME]                                | 2.98  | 2.69     | 2          | 2                 | 2          | 2      | 1.212E7 | 967   | 108.3    | 8.13     |
| Q9VMB6    | CG31911-PA OS=Drosophila melanogaster GN=Ent2 PE=2 SV=1 - [Q9VMB6_DROME]                                                     | 2.98  | 3.06     | 1          | 1                 | 1          | 1      | 2.292E7 | 458   | 51.3     | 8.70     |
| M9PDP6    | CG11377, isoform B OS=Drosophila melanogaster GN=CG11377 PE=4 SV=1 - [M9PDP6_DROME]                                          | 2.97  | 6.75     | 2          | 1                 | 1          | 1      |         | 311   | 34.2     | 5.48     |
| Q9W021    | 39S ribosomal protein L23, mitochondrial OS=Drosophila melanogaster GN=mRpl23 PE=2 SV=1 - [RM23_DROME]                       | 2.97  | 6.67     | 1          | 1                 | 1          | 1      | 2.568E7 | 150   | 17.9     | 9.61     |
| Q9VXM4    | LD12946p OS=Drosophila melanogaster GN=MSBP PE=2 SV=1 - [Q9VXM4_DROME]                                                       | 2.97  | 10.08    | 1          | 1                 | 1          | 2      |         | 248   | 27.9     | 4.74     |
| Q9V447    | Kruppel homolog 2 OS=Drosophila melanogaster GN=Kr-h2 PE=1 SV=1 - [KRH2_DROME]                                               | 2.95  | 6.88     | 1          | 1                 | 1          | 1      | 8.225E7 | 276   | 31.2     | 9.77     |
| A8Y589    | Apoptosis-linked gene-2 OS=Drosophila melanogaster GN=Alg-2 PE=4 SV=2 - [A8Y589_DROME]                                       | 2.95  | 6.74     | 1          | 1                 | 1          | 1      |         | 178   | 20.8     | 5.58     |
| Q9W2V9    | CG2221-PA OS=Drosophila melanogaster GN=(1)G0289 PE=2 SV=1 - [Q9W2V9_DROME]                                                  | 2.92  | 2.40     | 1          | 1                 | 1          | 1      | 1.553E7 | 625   | 67.2     | 7.02     |
| P40797    | Protein peanut OS=Drosophila melanogaster GN=pnut PE=1 SV=2 - [PNUT_DROME]                                                   | 2.92  | 10.39    | 1          | 2                 | 2          | 2      | 2.171E7 | 539   | 60.1     | 8.75     |
| Q9VKW3    | CG5313-PA OS=Drosophila melanogaster GN=RfC3 PE=2 SV=2 - [Q9VKW3_DROME]                                                      | 2.91  | 3.61     | 1          | 1                 | 1          | 1      | 1.275E7 | 332   | 37.4     | 7.20     |
| Q9I7T7    | La-related protein CG11505 OS=Drosophila melanogaster GN=CG11505 PE=1 SV=2 - [Y1505_DROME]                                   | 2.91  | 1.76     | 1          | 1                 | 1          | 1      | 2.332E7 | 1531  | 161.9    | 8.75     |
| Q9VHD3    | Probable maleylacetoacetate isomerase 1 OS=Drosophila melanogaster GN=GstZ1 PE=1 SV=1 - [MAA1_DROME]                         | 2.87  | 6.50     | 1          | 1                 | 1          | 1      |         | 246   | 27.9     | 8.90     |
| Q9VEC8    | CG7215, isoform A OS=Drosophila melanogaster GN=Prx5-RA PE=2 SV=1 - [Q9VEC8_DROME]                                           | 2.86  | 9.23     | 1          | 1                 | 1          | 1      |         | 130   | 14.7     | 7.28     |
| Q9VX91    | E3 ubiquitin-protein ligase UBR1 OS=Drosophila melanogaster GN=UBR1 PE=2 SV=2 - [UBR1_DROME]                                 | 2.86  | 1.48     | 1          | 1                 | 1          | 1      | 2.225E7 | 1824  | 208.2    | 6.43     |
| Q9VE75    | V-type proton ATPase subunit a OS=Drosophila melanogaster GN=Vha100-2 PE=2 SV=2 - [Q9VE75_DROME]                             | 2.86  | 3.72     | 1          | 1                 | 1          | 1      | 1.065E7 | 834   | 94.8     | 6.68     |
| Q9V3T8    | CG5442-PB, isoform B OS=Drosophila melanogaster GN=SC35 PE=2 SV=1 - [Q9V3T8_DROME]                                           | 2.84  | 5.64     | 1          | 1                 | 1          | 1      | 8.914E6 | 195   | 21.4     | 11.75    |
| O76752    | CG12117-PA OS=Drosophila melanogaster GN=Sptr PE=2 SV=1 - [O76752_DROME]                                                     | 2.84  | 5.75     | 1          | 1                 | 1          | 1      |         | 261   | 29.2     | 7.03     |
| Q9VHX4    | CG2767, isoform A OS=Drosophila melanogaster GN=CG2767 PE=2 SV=1 - [Q9VHX4_DROME]                                            | 2.84  | 14.89    | 2          | 4                 | 4          | 5      | 1.812E8 | 329   | 36.8     | 5.99     |
| O97182    | Actin related complex p41 subunit OS=Drosophila melanogaster GN=Arpc1 PE=2 SV=1 - [O97182_DROME]                             | 2.83  | 5.31     | 1          | 1                 | 1          | 1      | 3.680E7 | 377   | 41.6     | 8.35     |
| Q9VIG1    | CG12050 OS=Drosophila melanogaster GN=CG12050-RB PE=2 SV=2 - [Q9VIG1_DROME]                                                  | 2.83  | 1.68     | 1          | 1                 | 1          | 1      |         | 1071  | 119.9    | 8.72     |
| Q9VL69    | CG5885-PA OS=Drosophila melanogaster GN=BEST:CK01296 PE=2 SV=1 - [Q9VL69_DROME]                                              | 2.81  | 3.68     | 1          | 1                 | 1          | 1      | 2.099E6 | 190   | 21.6     | 9.57     |
| Q9VIV2    | LD45403p OS=Drosophila melanogaster GN=swm PE=2 SV=1 - [Q9VIV2_DROME]                                                        | 2.81  | 3.86     | 2          | 2                 | 2          | 4      | 2.758E7 | 1062  | 115.6    | 9.26     |
| Q9VZ64    | Probable 6-phosphogluconolactonase OS=Drosophila melanogaster GN=CG17333 PE=2 SV=1 - [6PGL_DROME]                            | 2.80  | 4.94     | 1          | 1                 | 1          | 1      |         | 243   | 26.7     | 8.21     |
| Q9VK57    | LD15349p OS=Drosophila melanogaster GN=Pih1D1 PE=2 SV=1 - [Q9VK57_DROME]                                                     | 2.80  | 8.36     | 2          | 1                 | 1          | 1      |         | 335   | 38.0     | 7.84     |
| Q9VL65    | TbCMF46 OS=Drosophila melanogaster GN=TbCMF46 PE=4 SV=2 - [Q9VL65_DROME]                                                     | 2.79  | 3.36     | 1          | 1                 | 1          | 2      | 8.259E6 | 566   | 66.6     | 4.72     |
| P54351    | Vesicle-fusing ATPase 2 OS=Drosophila melanogaster GN=Nsf2 PE=2 SV=2 - [NSF2_DROME]                                          | 2.78  | 3.72     | 1          | 2                 | 2          | 2      | 1.428E7 | 752   | 83.4     | 6.74     |
| Q9W5W8    | CG9577 OS=Drosophila melanogaster GN=CG9577 PE=2 SV=2 - [Q9W5W8_DROME]                                                       | 2.78  | 4.17     | 1          | 1                 | 1          | 1      |         | 312   | 33.8     | 7.46     |
| A1ZBF1    | CG18190 OS=Drosophila melanogaster GN=CG18190-RB PE=2 SV=2 - [A1ZBF1_DROME]                                                  | 2.78  | 5.65     | 1          | 1                 | 1          | 1      | 8.473E6 | 248   | 28.7     | 5.55     |



| Accession | Description                                                                                                                     | Score | Coverage | # Proteins | # Unique Peptides | # Peptides | # PSMs | Area    | # AAs | MW [kDa] | calc. pI |
|-----------|---------------------------------------------------------------------------------------------------------------------------------|-------|----------|------------|-------------------|------------|--------|---------|-------|----------|----------|
| Q9VVN2    | Probable 28S ribosomal protein S26, mitochondrial OS=Drosophila melanogaster GN=mRpS26 PE=2 SV=1 - [RT26_DROME]                 | 2.77  | 12.89    | 1          | 2                 | 2          | 2      | 1.553E7 | 225   | 26.2     | 8.41     |
| Q9VY49    | CG11674 OS=Drosophila melanogaster GN=CG11674 PE=2 SV=2 - [Q9VY49_DROME]                                                        | 2.77  | 6.40     | 1          | 2                 | 2          | 2      | 1.972E7 | 344   | 38.0     | 6.84     |
| Q9VQ00    | Serine/threonine-protein phosphatase 2A activator OS=Drosophila melanogaster GN=Ptpa PE=2 SV=1 - [Q9VQ00_DROME]                 | 2.75  | 3.27     | 1          | 1                 | 1          | 1      | 3.589E7 | 398   | 44.2     | 5.90     |
| L7EG14    | Dead box protein 80, isoform F OS=Drosophila melanogaster GN=Dbp80 PE=4 SV=1 - [L7EG14_DROME]                                   | 2.75  | 6.96     | 5          | 2                 | 2          | 2      | 2.817E7 | 316   | 35.7     | 6.93     |
| Q9VX44    | Lethal (1) G0222, isoform F OS=Drosophila melanogaster GN=(1)G0222 PE=4 SV=2 - [Q9VX44_DROME]                                   | 2.75  | 1.71     | 3          | 1                 | 1          | 1      | 1.254E7 | 1110  | 123.0    | 8.25     |
| Q8IH00    | Nucleolar protein 6 OS=Drosophila melanogaster GN=Mat89Ba PE=1 SV=1 - [NOL6_DROME]                                              | 2.75  | 1.59     | 1          | 1                 | 1          | 1      | 1.587E7 | 1193  | 136.3    | 9.00     |
| Q9VLR5    | RNA polymerase II transcriptional coactivator OS=Drosophila melanogaster GN=Ssb-c31a PE=2 SV=1 - [TCP4_DROME]                   | 2.74  | 14.55    | 1          | 1                 | 1          | 1      | 5.807E6 | 110   | 12.2     | 9.17     |
| Q9VZE4    | CG1316 OS=Drosophila melanogaster GN=CG1316 PE=2 SV=2 - [Q9VZE4_DROME]                                                          | 2.74  | 2.34     | 1          | 1                 | 1          | 1      | 8.017E6 | 470   | 52.4     | 6.71     |
| Q9VUI8    | CG5114, isoform A OS=Drosophila melanogaster GN=CG5114 PE=2 SV=1 - [Q9VUI8_DROME]                                               | 2.73  | 5.41     | 2          | 2                 | 2          | 3      | 3.092E7 | 425   | 47.5     | 4.64     |
| P04388    | Ras-like protein 2 OS=Drosophila melanogaster GN=Ras64B PE=1 SV=2 - [RAS2_DROME]                                                | 2.73  | 7.81     | 1          | 1                 | 1          | 1      |         | 192   | 22.2     | 6.77     |
| Q9VZC8    | CG15019, isoform B OS=Drosophila melanogaster GN=CG15019 PE=2 SV=1 - [Q9VZC8_DROME]                                             | 2.73  | 10.27    | 1          | 1                 | 1          | 1      | 3.940E7 | 146   | 17.3     | 9.94     |
| Q9V3J1    | V-type proton ATPase subunit H OS=Drosophila melanogaster GN=VhaSFD PE=2 SV=2 - [VATH_DROME]                                    | 2.72  | 6.20     | 1          | 2                 | 2          | 2      | 5.383E7 | 468   | 53.7     | 6.61     |
| P36872    | Protein phosphatase PP2A 55 kDa regulatory subunit OS=Drosophila melanogaster GN=tw5 PE=2 SV=1 - [2ABA_DROME]                   | 2.72  | 7.41     | 1          | 3                 | 3          | 6      | 3.131E7 | 499   | 56.9     | 7.09     |
| Q9V3Y2    | Anamorsin homolog OS=Drosophila melanogaster GN=CIAPIN1 PE=2 SV=1 - [DRE2_DROME]                                                | 2.71  | 12.10    | 1          | 2                 | 2          | 2      | 4.337E7 | 248   | 27.1     | 5.21     |
| Q8SXV6    | Transmembrane emp24 domain-containing protein bai OS=Drosophila melanogaster GN=bai PE=2 SV=1 - [TMEDA_DROME]                   | 2.69  | 4.85     | 1          | 1                 | 1          | 1      |         | 206   | 23.7     | 8.22     |
| P51592    | E3 ubiquitin-protein ligase hyd OS=Drosophila melanogaster GN=hyd PE=1 SV=3 - [HYD_DROME]                                       | 2.68  | 0.73     | 1          | 1                 | 1          | 1      | 1.525E7 | 2885  | 318.7    | 5.94     |
| Q9VLI9    | 39S ribosomal protein L51, mitochondrial OS=Drosophila melanogaster GN=mRplL51 PE=2 SV=2 - [RM51_DROME]                         | 2.67  | 6.90     | 1          | 1                 | 1          | 1      |         | 174   | 20.2     | 10.54    |
| M9NE97    | Copper transporter 1A, isoform C OS=Drosophila melanogaster GN=Ctr1A PE=4 SV=1 - [M9NE97_DROME]                                 | 2.66  | 8.71     | 1          | 1                 | 1          | 1      | 2.141E7 | 241   | 26.8     | 6.70     |
| Q9VYN1    | Protein kinase C delta, isoform E OS=Drosophila melanogaster GN=Pkcdelta PE=4 SV=3 - [Q9VYN1_DROME]                             | 2.66  | 1.21     | 1          | 1                 | 1          | 1      |         | 1894  | 206.5    | 8.03     |
| Q9VBI2    | UMP-CMP kinase OS=Drosophila melanogaster GN=Dak1 PE=2 SV=1 - [Q9VBI2_DROME]                                                    | 2.66  | 9.09     | 1          | 2                 | 2          | 2      | 3.194E7 | 253   | 27.8     | 8.00     |
| Q8IPJ7    | CG11567-PB, isoform B OS=Drosophila melanogaster GN=Cpr PE=4 SV=1 - [Q8IPJ7_DROME]                                              | 2.65  | 2.18     | 2          | 1                 | 1          | 1      | 1.323E7 | 550   | 62.8     | 8.24     |
| M9PGG0    | ADP-ribosylation factor GTPase activating protein 3, isoform E OS=Drosophila melanogaster GN=ArfGAP3 PE=4 SV=1 - [M9PGG0_DROME] | 2.65  | 4.87     | 5          | 1                 | 1          | 1      | 2.502E7 | 513   | 54.4     | 8.94     |
| Q7KQM6    | PERQ amino acid-rich with GYF domain-containing protein CG11148 OS=Drosophila melanogaster GN=CG11148 PE=1 SV=2 - [PERQ1_DROME] | 2.64  | 1.08     | 1          | 1                 | 1          | 1      | 9.430E6 | 1574  | 173.6    | 7.11     |
| Q7K4B3    | Probable elongator complex protein 2 OS=Drosophila melanogaster GN=Elp2 PE=1 SV=1 - [ELP2_DROME]                                | 2.63  | 5.04     | 1          | 3                 | 3          | 3      | 2.616E7 | 794   | 88.9     | 5.60     |
| Q9VHR5    | CG9684 OS=Drosophila melanogaster GN=CG9684 PE=4 SV=2 - [Q9VHR5_DROME]                                                          | 2.63  | 4.36     | 1          | 2                 | 2          | 2      | 4.803E7 | 642   | 71.9     | 7.99     |
| A1ZBU8    | CG18067 OS=Drosophila melanogaster GN=CG18067 PE=4 SV=1 - [A1ZBU8_DROME]                                                        | 2.62  | 7.35     | 1          | 2                 | 2          | 2      | 5.236E7 | 245   | 26.2     | 5.29     |
| Q9VAJ9    | CG1907 OS=Drosophila melanogaster GN=CG1907 PE=2 SV=1 - [Q9VAJ9_DROME]                                                          | 2.62  | 3.79     | 1          | 1                 | 1          | 1      | 1.007E8 | 317   | 34.6     | 9.79     |
| Q9VP77    | CG10565, isoform A OS=Drosophila melanogaster GN=CG10565 PE=2 SV=1 - [Q9VP77_DROME]                                             | 2.62  | 3.41     | 1          | 2                 | 2          | 3      | 3.834E7 | 646   | 73.6     | 8.97     |
| P98159    | Serine protease nudel OS=Drosophila melanogaster GN=ndl PE=1 SV=2 - [NUDEL_DROME]                                               | 2.62  | 1.91     | 1          | 2                 | 2          | 2      | 1.413E7 | 2616  | 292.3    | 5.92     |
| P14318    | Muscle-specific protein 20 OS=Drosophila melanogaster GN=Mp20 PE=2 SV=2 - [MP20_DROME]                                          | 2.62  | 7.07     | 1          | 1                 | 1          | 1      |         | 184   | 20.2     | 8.65     |
| Q8IML2    | V-type proton ATPase subunit a OS=Drosophila melanogaster GN=Vha100-1 PE=3 SV=2 - [Q8IML2_DROME]                                | 2.60  | 1.33     | 6          | 1                 | 1          | 1      | 2.123E7 | 825   | 94.1     | 7.46     |
| Q9VQD7    | CG3214, isoform B OS=Drosophila melanogaster GN=CG3214 PE=4 SV=1 - [Q9VQD7_DROME]                                               | 2.60  | 9.15     | 1          | 1                 | 1          | 1      | 1.527E7 | 142   | 16.8     | 9.23     |
| Q9VBX1    | Nuclear export mediator factor NEMF homolog OS=Drosophila melanogaster GN=Cln PE=1 SV=2 - [NEMF_DROME]                          | 2.60  | 7.46     | 1          | 3                 | 3          | 3      | 1.083E7 | 992   | 112.5    | 7.17     |
| Q8IMR3    | CG5484, isoform B OS=Drosophila melanogaster GN=CG5484-RB PE=2 SV=1 - [Q8IMR3_DROME]                                            | 2.59  | 2.54     | 3          | 1                 | 1          | 1      | 2.015E7 | 393   | 43.6     | 9.23     |
| Q9VRD4    | CG1532, isoform B OS=Drosophila melanogaster GN=CG1532 PE=4 SV=1 - [Q9VRD4_DROME]                                               | 2.58  | 6.25     | 1          | 1                 | 1          | 1      |         | 288   | 31.6     | 5.39     |
| Q9VX15    | CG8142 OS=Drosophila melanogaster GN=CG8142 PE=2 SV=2 - [Q9VX15_DROME]                                                          | 2.57  | 2.83     | 1          | 1                 | 1          | 1      |         | 353   | 39.5     | 7.87     |
| Q9U616    | Glycine cleavage system H protein, mitochondrial OS=Drosophila melanogaster GN=ppl PE=2 SV=1 - [GCSH_DROME]                     | 2.57  | 10.91    | 1          | 1                 | 1          | 1      | 1.138E7 | 165   | 18.0     | 5.20     |
| Q9VWF8    | CG14210, isoform B OS=Drosophila melanogaster GN=CG14210 PE=2 SV=1 - [Q9VWF8_DROME]                                             | 2.57  | 7.86     | 1          | 2                 | 2          | 2      | 8.948E6 | 140   | 16.5     | 10.81    |
| Q9W011    | Probable cytochrome P450 4d20 OS=Drosophila melanogaster GN=Cyp4d20 PE=3 SV=1 - [C4D20_DROME]                                   | 2.56  | 4.12     | 1          | 1                 | 1          | 1      |         | 510   | 58.2     | 8.57     |
| A1ZB29    | CG5757 OS=Drosophila melanogaster GN=CG5757 PE=3 SV=1 - [A1ZB29_DROME]                                                          | 2.56  | 5.69     | 1          | 1                 | 1          | 1      | 8.396E6 | 211   | 23.8     | 7.44     |
| Q9VXY3    | CG5599 OS=Drosophila melanogaster GN=CG5599 PE=2 SV=1 - [Q9VXY3_DROME]                                                          | 2.56  | 4.98     | 1          | 1                 | 1          | 1      | 2.803E7 | 462   | 50.0     | 6.61     |
| M9PGM3    | CG42593, isoform C OS=Drosophila melanogaster GN=CG1530 PE=4 SV=1 - [M9PGM3_DROME]                                              | 2.54  | 1.67     | 3          | 1                 | 1          | 1      |         | 2218  | 246.8    | 5.87     |
| Q9W4C4    | CG3249-PA, isoform A OS=Drosophila melanogaster GN=spoon PE=2 SV=2 - [Q9W4C4_DROME]                                             | 2.53  | 4.10     | 2          | 2                 | 2          | 2      | 6.441E7 | 585   | 64.9     | 6.34     |
| Q8IPK1    | Uncoupling protein 4B, isoform B OS=Drosophila melanogaster GN=Ucp4B PE=3 SV=1 - [Q8IPK1_DROME]                                 | 2.53  | 8.56     | 3          | 1                 | 1          | 1      |         | 122   | 24.6     | 9.29     |
| Q9VTY6    | Ubiquitin-conjugating enzyme E2 C OS=Drosophila melanogaster GN=vih PE=1 SV=1 - [UBE2C_DROME]                                   | 2.53  | 16.29    | 1          | 2                 | 2          | 2      | 1.429E7 | 178   | 19.8     | 6.68     |
| P52034    | ATP-dependent 6-phosphofruktokinase OS=Drosophila melanogaster GN=Pfk PE=2 SV=2 - [PFKA_DROME]                                  | 2.53  | 1.52     | 1          | 1                 | 1          | 1      |         | 788   | 86.6     | 6.83     |
| Q86B13    | CG5215-PB, isoform B OS=Drosophila melanogaster GN=Zn72D PE=4 SV=1 - [Q86B13_DROME]                                             | 2.53  | 3.96     | 3          | 3                 | 3          | 4      | 1.706E7 | 884   | 96.0     | 8.44     |
| Q9W088    | DNA polymerase delta small subunit OS=Drosophila melanogaster GN=CG12018 PE=2 SV=1 - [DPOD2_DROME]                              | 2.52  | 2.78     | 1          | 1                 | 1          | 2      | 8.461E6 | 431   | 48.0     | 6.52     |
| O76511    | Thymidylate synthase OS=Drosophila melanogaster GN=Ts PE=1 SV=2 - [TYSY_DROME]                                                  | 2.51  | 2.80     | 1          | 1                 | 1          | 1      | 2.202E7 | 321   | 36.6     | 6.61     |
| Q9W335    | LD26546p OS=Drosophila melanogaster GN=(1)G0320 PE=2 SV=1 - [Q9W335_DROME]                                                      | 2.51  | 11.59    | 1          | 2                 | 2          | 2      | 1.420E7 | 302   | 33.0     | 4.84     |

| Accession | Description                                                                                                         | Score | Coverage | # Proteins | # Unique Peptides | # Peptides | # PSMs | Area    | # AAs | MW [kDa] | calc. pI |
|-----------|---------------------------------------------------------------------------------------------------------------------|-------|----------|------------|-------------------|------------|--------|---------|-------|----------|----------|
| Q8IP52    | CG43333 OS=Drosophila melanogaster GN=BG:DS01523.2 PE=2 SV=1 - [Q8IP52_DROME]                                       | 2.51  | 1.54     | 1          | 1                 | 1          | 1      | 7.548E6 | 1166  | 128.8    | 8.54     |
| P52304    | Serine/threonine-protein kinase polo OS=Drosophila melanogaster GN=polo PE=1 SV=2 - [POLO_DROME]                    | 2.51  | 7.81     | 1          | 4                 | 4          | 4      | 3.792E7 | 576   | 66.9     | 8.88     |
| Q9VB69    | Malic enzyme OS=Drosophila melanogaster GN=Men-b PE=2 SV=1 - [Q9VB69_DROME]                                         | 2.50  | 3.24     | 3          | 1                 | 1          | 1      | 1.955E7 | 617   | 68.5     | 6.71     |
| Q9VKC5    | CG6770-PA OS=Drosophila melanogaster GN=CG6770-RA PE=2 SV=1 - [Q9VKC5_DROME]                                        | 2.50  | 23.19    | 1          | 1                 | 1          | 1      | 4.112E7 | 69    | 8.1      | 8.76     |
| Q9W592    | CG14786 OS=Drosophila melanogaster GN=EG:BACN32G11.3 PE=4 SV=1 - [Q9W592_DROME]                                     | 2.50  | 1.12     | 1          | 1                 | 1          | 1      | 8.328E6 | 1072  | 120.1    | 8.22     |
| Q9VVJ7    | CG7484 OS=Drosophila melanogaster GN=CG7484 PE=1 SV=2 - [Q9VVJ7_DROME]                                              | 2.50  | 11.24    | 1          | 2                 | 2          | 2      | 2.664E7 | 178   | 19.9     | 5.66     |
| Q7JQH9    | LD31742p OS=Drosophila melanogaster GN=whd PE=2 SV=1 - [Q7JQH9_DROME]                                               | 2.50  | 2.56     | 2          | 2                 | 2          | 2      | 1.017E7 | 780   | 89.4     | 8.46     |
| P91875    | DNA-directed RNA polymerase I subunit RPA1 OS=Drosophila melanogaster GN=RpI1 PE=1 SV=2 - [RPA1_DROME]              | 2.49  | 1.95     | 1          | 2                 | 2          | 2      | 2.666E7 | 1642  | 185.3    | 7.64     |
| Q9GYU8    | Nuclear pore complex protein Nup88 OS=Drosophila melanogaster GN=mbo PE=1 SV=2 - [NUP88_DROME]                      | 2.49  | 1.14     | 1          | 1                 | 1          | 1      | 2.291E7 | 702   | 78.6     | 5.91     |
| A8DY43    | CG34372 OS=Drosophila melanogaster GN=CG34372 PE=4 SV=1 - [A8DY43_DROME]                                            | 2.47  | 5.15     | 1          | 2                 | 2          | 2      | 1010    | 112.0 | 8.28     |          |
| Q9VVC8    | CG6664, isoform A OS=Drosophila melanogaster GN=CG6664 PE=2 SV=1 - [Q9VVC8_DROME]                                   | 2.47  | 1.88     | 1          | 1                 | 1          | 1      | 7.552E6 | 532   | 57.8     | 6.67     |
| A1ZA22    | eIF2B-gamma OS=Drosophila melanogaster GN=eIF2B-gamma PE=4 SV=1 - [A1ZA22_DROME]                                    | 2.47  | 3.08     | 1          | 1                 | 1          | 1      | 455     | 50.6  | 7.55     |          |
| Q9VJU0    | 39S ribosomal protein L39, mitochondrial OS=Drosophila melanogaster GN=mRpL39 PE=1 SV=2 - [RM39_DROME]              | 2.46  | 8.41     | 1          | 2                 | 2          | 2      | 1.231E7 | 333   | 37.3     | 8.62     |
| A1YK02    | Nup75 OS=Drosophila melanogaster GN=Nup75 PE=4 SV=1 - [A1YK02_DROME]                                                | 2.45  | 3.59     | 1          | 2                 | 2          | 2      | 4.974E6 | 668   | 76.8     | 6.05     |
| Q8MSS1    | Protein lava lamp OS=Drosophila melanogaster GN=lva PE=1 SV=2 - [LVA_DROME]                                         | 2.45  | 0.43     | 1          | 1                 | 1          | 1      | 3.930E6 | 2779  | 315.7    | 4.86     |
| Q9VNB5    | Odorant receptor coreceptor OS=Drosophila melanogaster GN=Orco PE=1 SV=2 - [OR83B_DROME]                            | 2.44  | 4.12     | 1          | 1                 | 1          | 1      | 486     | 54.4  | 8.50     |          |
| Q9VV52    | LD37257p OS=Drosophila melanogaster GN=RAF2 PE=2 SV=3 - [Q9VV52_DROME]                                              | 2.44  | 6.18     | 1          | 3                 | 3          | 3      | 1.107E6 | 1117  | 125.4    | 9.26     |
| Q9VXN2    | CG9032-PA, isoform A OS=Drosophila melanogaster GN=sun PE=2 SV=1 - [Q9VXN2_DROME]                                   | 2.43  | 19.67    | 1          | 1                 | 1          | 1      | 5.218E7 | 61    | 6.8      | 10.59    |
| Q7KLE5    | Amphiphysin OS=Drosophila melanogaster GN=Amph PE=1 SV=1 - [Q7KLE5_DROME]                                           | 2.43  | 1.99     | 1          | 1                 | 1          | 1      | 1.796E7 | 602   | 65.9     | 5.25     |
| Q8IN97    | Cellular repressor of E1A-stimulated genes, isoform C OS=Drosophila melanogaster GN=CREG PE=4 SV=1 - [Q8IN97_DROME] | 2.43  | 7.51     | 2          | 1                 | 1          | 1      | 1.208E7 | 173   | 19.7     | 9.23     |
| Q94519    | Acyl carrier protein, mitochondrial OS=Drosophila melanogaster GN=mtacp1 PE=2 SV=1 - [ACPM_DROME]                   | 2.43  | 5.92     | 2          | 1                 | 1          | 1      | 152     | 17.2  | 6.79     |          |
| Q9VAG9    | CG7789 OS=Drosophila melanogaster GN=CG7789 PE=2 SV=1 - [Q9VAG9_DROME]                                              | 2.42  | 3.27     | 1          | 1                 | 1          | 1      | 306     | 32.6  | 5.92     |          |
| P52654    | Transcription initiation factor IIA subunit 1 OS=Drosophila melanogaster GN=TFIIA-L PE=1 SV=2 - [TF2AA_DROME]       | 2.42  | 6.28     | 1          | 1                 | 1          | 1      | 7.888E6 | 366   | 39.2     | 4.73     |
| Q7KQM8    | CG11076, isoform D OS=Drosophila melanogaster GN=CG11076 PE=4 SV=2 - [Q7KQM8_DROME]                                 | 2.42  | 6.15     | 2          | 1                 | 1          | 1      | 260     | 29.5  | 9.26     |          |
| Q9W0R0    | Cell division cycle 5 ortholog, isoform A OS=Drosophila melanogaster GN=Cdc5 PE=2 SV=2 - [Q9W0R0_DROME]             | 2.41  | 1.35     | 1          | 1                 | 1          | 1      | 814     | 93.0  | 8.19     |          |
| Q9VYH3    | Probable alpha-aspartyl dipeptidase OS=Drosophila melanogaster GN=CG2200 PE=1 SV=1 - [PEPE_DROME]                   | 2.41  | 6.67     | 1          | 1                 | 1          | 2      | 6.799E6 | 240   | 26.6     | 7.03     |
| Q7JWD6    | Elongin C, isoform A OS=Drosophila melanogaster GN=Eloc PE=1 SV=1 - [Q7JWD6_DROME]                                  | 2.41  | 8.55     | 1          | 1                 | 1          | 1      | 9.763E7 | 117   | 13.1     | 5.05     |
| Q9VAI6    | General odorant-binding protein 99b OS=Drosophila melanogaster GN=Obp99b PE=2 SV=1 - [OB99B_DROME]                  | 2.40  | 12.75    | 1          | 2                 | 2          | 2      | 6.356E7 | 149   | 17.2     | 6.60     |
| Q9VGX3    | Protein anoxia up-regulated OS=Drosophila melanogaster GN=fau PE=1 SV=3 - [FAU_DROME]                               | 2.39  | 3.23     | 1          | 2                 | 2          | 2      | 619     | 68.6  | 5.06     |          |
| Q8MKW7    | Ribonuclease Z, mitochondrial OS=Drosophila melanogaster GN=JhI-1 PE=1 SV=2 - [RNZ_DROME]                           | 2.39  | 1.70     | 1          | 1                 | 1          | 1      | 766     | 85.4  | 6.99     |          |
| Q9W2I2    | CG9752 OS=Drosophila melanogaster GN=CG9752 PE=4 SV=1 - [Q9W2I2_DROME]                                              | 2.39  | 6.71     | 1          | 1                 | 1          | 1      | 343     | 39.5  | 5.73     |          |
| Q8INK9    | Methionine-R-sulfoxide reductase B1 OS=Drosophila melanogaster GN=SelR PE=1 SV=3 - [MSRB_DROME]                     | 2.39  | 11.54    | 1          | 1                 | 1          | 3      | 2.604E7 | 208   | 23.3     | 8.70     |
| Q9W547    | LD21404p OS=Drosophila melanogaster GN=mRpL16 PE=2 SV=1 - [Q9W547_DROME]                                            | 2.39  | 4.12     | 1          | 1                 | 1          | 1      | 3.872E6 | 243   | 28.0     | 10.17    |
| M9MS86    | Mucin related 2B, isoform B OS=Drosophila melanogaster GN=Mur2B PE=4 SV=1 - [M9MS86_DROME]                          | 2.38  | 0.96     | 2          | 1                 | 1          | 1      | 4.487E7 | 1144  | 124.2    | 9.25     |
| Q8T045    | O-glucosyltransferase rumi OS=Drosophila melanogaster GN=rumi PE=1 SV=1 - [RUMI_DROME]                              | 2.38  | 2.92     | 1          | 1                 | 1          | 1      | 1.237E7 | 411   | 47.7     | 8.25     |
| Q9VN68    | Cdep, isoform C OS=Drosophila melanogaster GN=Cdep PE=2 SV=2 - [Q9VN68_DROME]                                       | 2.38  | 5.94     | 2          | 1                 | 1          | 1      | 9.488E6 | 404   | 45.9     | 9.29     |
| Q9VAP0    | CG14516, isoform A OS=Drosophila melanogaster GN=CG14516 PE=4 SV=2 - [Q9VAP0_DROME]                                 | 2.37  | 0.81     | 2          | 1                 | 1          | 1      | 3.842E6 | 990   | 114.1    | 5.88     |
| Q9VE52    | Cleavage stimulation factor 64 kilodalton subunit OS=Drosophila melanogaster GN=CstF-64 PE=2 SV=2 - [Q9VE52_DROME]  | 2.36  | 3.10     | 1          | 1                 | 1          | 1      | 1.357E7 | 419   | 46.2     | 5.78     |
| Q9W1K4    | Egalitarian OS=Drosophila melanogaster GN=egl PE=4 SV=4 - [Q9W1K4_DROME]                                            | 2.35  | 3.49     | 1          | 2                 | 2          | 3      | 2.674E7 | 1004  | 112.1    | 7.28     |
| A8DY87    | cAMP-dependent protein kinase R2, isoform D OS=Drosophila melanogaster GN=Pka-R2 PE=4 SV=1 - [A8DY87_DROME]         | 2.34  | 3.22     | 3          | 1                 | 1          | 1      | 1.839E7 | 373   | 42.4     | 4.92     |
| Q7KJA9    | O-glycosyltransferase OS=Drosophila melanogaster GN=svc PE=2 SV=1 - [Q7KJA9_DROME]                                  | 2.34  | 1.61     | 1          | 1                 | 1          | 1      | 4.315E6 | 1059  | 118.6    | 7.15     |
| Q9VHC6    | Ric1, isoform A OS=Drosophila melanogaster GN=mRpL47 PE=4 SV=2 - [Q9VHC6_DROME]                                     | 2.34  | 4.85     | 2          | 1                 | 1          | 1      | 1.673E7 | 227   | 26.4     | 9.77     |
| Q9W379    | LD37736p OS=Drosophila melanogaster GN=Zpr1 PE=2 SV=1 - [Q9W379_DROME]                                              | 2.34  | 7.88     | 1          | 2                 | 2          | 2      | 2.267E7 | 457   | 51.3     | 4.74     |
| Q9VR89    | RNA-binding protein pno1 OS=Drosophila melanogaster GN=l(1)G0004 PE=2 SV=1 - [PNO1_DROME]                           | 2.32  | 4.17     | 1          | 1                 | 1          | 1      | 2.273E7 | 240   | 26.7     | 9.95     |
| Q8MSS7    | CG2937-PA OS=Drosophila melanogaster GN=mRpS2 PE=2 SV=1 - [Q8MSS7_DROME]                                            | 2.32  | 4.17     | 1          | 1                 | 1          | 1      | 6.485E6 | 264   | 30.2     | 9.14     |
| Q07327    | Protein ROP OS=Drosophila melanogaster GN=Rop PE=2 SV=2 - [ROP_DROME]                                               | 2.31  | 2.18     | 1          | 1                 | 1          | 1      | 6.338E6 | 597   | 67.8     | 6.70     |
| Q9V5P6    | H/ACA ribonucleoprotein complex subunit 3 OS=Drosophila melanogaster GN=CG7637 PE=1 SV=1 - [NOPI0_DROME]            | 2.31  | 35.94    | 1          | 2                 | 2          | 3      | 1.607E8 | 64    | 7.6      | 9.92     |
| Q7K2L7    | CG17765 OS=Drosophila melanogaster GN=CG17765 PE=1 SV=1 - [Q7K2L7_DROME]                                            | 2.31  | 8.04     | 1          | 2                 | 2          | 2      | 3.326E7 | 199   | 22.5     | 4.86     |
| A8DYI1    | CG30118, isoform B OS=Drosophila melanogaster GN=CG30118 PE=4 SV=1 - [A8DYI1_DROME]                                 | 2.30  | 2.97     | 3          | 1                 | 1          | 1      | 471     | 53.5  | 8.84     |          |
| Q8IN89    | RAC serine/threonine-protein kinase OS=Drosophila melanogaster GN=Akt1 PE=1 SV=3 - [AKT1_DROME]                     | 2.30  | 3.44     | 1          | 1                 | 1          | 1      | 2.548E6 | 611   | 68.4     | 6.24     |

| Accession | Description                                                                                                             | Score | Coverage | # Proteins | # Unique Peptides | # Peptides | # PSMs | Area    | # AAs | MW [kDa] | calc. pI |
|-----------|-------------------------------------------------------------------------------------------------------------------------|-------|----------|------------|-------------------|------------|--------|---------|-------|----------|----------|
| Q9V3Y4    | CG6851-PA, isoform A OS=Drosophila melanogaster GN=Mtch PE=2 SV=1 - [Q9V3Y4_DROME]                                      | 2.30  | 5.06     | 1          | 1                 | 1          | 2      | 3.652E6 | 316   | 35.0     | 9.06     |
| A1Z7K2    | CG30349 OS=Drosophila melanogaster GN=CG30349-RA PE=2 SV=1 - [A1Z7K2_DROME]                                             | 2.29  | 1.77     | 1          | 1                 | 1          | 1      | 3.295E7 | 620   | 68.3     | 5.94     |
| Q9XZH6    | V-type proton ATPase subunit G OS=Drosophila melanogaster GN=Vha13 PE=1 SV=1 - [VATG_DROME]                             | 2.29  | 15.38    | 1          | 2                 | 2          | 2      | 6.946E7 | 117   | 13.6     | 9.58     |
| Q9VJH2    | CG13739, isoform A OS=Drosophila melanogaster GN=mdy PE=2 SV=3 - [Q9VJH2_DROME]                                         | 2.29  | 1.39     | 1          | 1                 | 1          | 1      | 1082    | 121.4 | 5.82     |          |
| Q7JVK6    | GM27569p OS=Drosophila melanogaster GN=trsn PE=1 SV=1 - [Q7JVK6_DROME]                                                  | 2.28  | 5.11     | 1          | 1                 | 1          | 1      | 235     | 27.0  | 5.50     |          |
| O77266    | CG4199, isoform A OS=Drosophila melanogaster GN=CG4199 PE=4 SV=3 - [O77266_DROME]                                       | 2.27  | 1.81     | 2          | 1                 | 1          | 1      | 1.056E7 | 552   | 60.7     | 5.73     |
| Q9VNT6    | CG5964 OS=Drosophila melanogaster GN=CG5964 PE=4 SV=1 - [Q9VNT6_DROME]                                                  | 2.27  | 2.48     | 1          | 1                 | 1          | 1      | 928     | 106.3 | 5.47     |          |
| M9PCS5    | CG18304, isoform C OS=Drosophila melanogaster GN=CG18304 PE=4 SV=1 - [M9PCS5_DROME]                                     | 2.26  | 0.83     | 4          | 1                 | 1          | 1      | 1813    | 204.3 | 9.29     |          |
| Q9VII1    | CG9336, isoform A OS=Drosophila melanogaster GN=CG9336-RA PE=2 SV=1 - [Q9VII1_DROME]                                    | 2.25  | 16.22    | 2          | 2                 | 2          | 2      | 2.721E7 | 148   | 15.9     | 7.71     |
| Q960K8    | CG5044, isoform A OS=Drosophila melanogaster GN=CG5044 PE=2 SV=1 - [Q960K8_DROME]                                       | 2.25  | 9.09     | 2          | 2                 | 2          | 2      | 1.341E7 | 385   | 42.7     | 8.35     |
| Q9VKW1    | CG5168, isoform A OS=Drosophila melanogaster GN=CG5168 PE=2 SV=1 - [Q9VKW1_DROME]                                       | 2.25  | 4.17     | 1          | 1                 | 1          | 1      | 9.728E6 | 408   | 46.2     | 7.37     |
| Q9V463    | Nucleoporin 154kD, isoform A OS=Drosophila melanogaster GN=Nup154 PE=2 SV=1 - [Q9V463_DROME]                            | 2.25  | 5.57     | 1          | 4                 | 4          | 5      | 3.875E7 | 1365  | 153.8    | 6.58     |
| Q8IR41    | CG43737, isoform C OS=Drosophila melanogaster GN=CG15029 PE=4 SV=2 - [Q8IR41_DROME]                                     | 2.25  | 1.62     | 2          | 1                 | 1          | 1      | 7.486E7 | 1483  | 157.0    | 4.68     |
| Q9W2G8    | Acyl-coenzyme A oxidase OS=Drosophila melanogaster GN=Acox57D-d PE=2 SV=1 - [Q9W2G8_DROME]                              | 2.24  | 3.40     | 1          | 1                 | 1          | 1      | 1.346E7 | 677   | 75.4     | 8.34     |
| M9PB96    | Ribosome biogenesis protein WDR12 homolog OS=Drosophila melanogaster GN=CG6724 PE=3 SV=1 - [M9PB96_DROME]               | 2.24  | 7.18     | 2          | 2                 | 2          | 5      | 2.639E8 | 418   | 46.9     | 5.31     |
| P91623    | GATA-binding factor C OS=Drosophila melanogaster GN=grn PE=2 SV=1 - [GATAC_DROME]                                       | 2.24  | 5.35     | 2          | 1                 | 1          | 1      | 486     | 50.6  | 9.36     |          |
| Q7K4G8    | CG13083 OS=Drosophila melanogaster GN=CG13083-RB PE=2 SV=1 - [Q7K4G8_DROME]                                             | 2.24  | 14.56    | 1          | 3                 | 3          | 4      | 1.757E8 | 316   | 35.4     | 6.28     |
| Q7K4G8    | CG12391 OS=Drosophila melanogaster GN=CG12391 PE=2 SV=1 - [Q7K4G8_DROME]                                                | 2.24  | 2.73     | 1          | 1                 | 1          | 1      | 4.407E6 | 587   | 66.4     | 4.81     |
| Q01989    | Myosin heavy chain 95F OS=Drosophila melanogaster GN=jar PE=2 SV=4 - [MYS9_DROME]                                       | 2.24  | 3.59     | 1          | 3                 | 3          | 3      | 1.003E7 | 1253  | 143.2    | 8.63     |
| Q9W2U8    | Neb-cGP, isoform A OS=Drosophila melanogaster GN=Neb-cGP PE=2 SV=1 - [Q9W2U8_DROME]                                     | 2.23  | 20.83    | 1          | 1                 | 1          | 2      | 3.061E8 | 48    | 5.1      | 10.10    |
| Q9VU65    | POC1 centriolar protein homolog OS=Drosophila melanogaster GN=Poc1 PE=2 SV=1 - [POC1_DROME]                             | 2.23  | 4.09     | 2          | 1                 | 1          | 1      | 391     | 42.8  | 8.44     |          |
| Q9Y102    | BcDNA.GH11973 OS=Drosophila melanogaster GN=rgn PE=2 SV=1 - [Q9Y102_DROME]                                              | 2.23  | 1.50     | 2          | 1                 | 1          | 2      | 800     | 97.3  | 9.22     |          |
| Q9W225    | CG3746 OS=Drosophila melanogaster GN=CG3746 PE=2 SV=1 - [Q9W225_DROME]                                                  | 2.23  | 14.57    | 1          | 1                 | 1          | 1      | 1.614E7 | 151   | 16.6     | 8.09     |
| Q85Y96    | NFU1 iron-sulfur cluster scaffold homolog, mitochondrial OS=Drosophila melanogaster GN=CG32500 PE=2 SV=1 - [NFU1_DROME] | 2.22  | 6.71     | 1          | 1                 | 1          | 1      | 283     | 31.3  | 5.40     |          |
| Q00637    | Superoxide dismutase [Mn], mitochondrial OS=Drosophila melanogaster GN=Sod2 PE=2 SV=3 - [SODM_DROME]                    | 2.22  | 7.37     | 1          | 2                 | 2          | 2      | 6.077E7 | 217   | 24.7     | 8.15     |
| P40301    | Proteasome subunit alpha type-2 OS=Drosophila melanogaster GN=Prosalpha2 PE=1 SV=1 - [PSA2_DROME]                       | 2.22  | 5.98     | 1          | 2                 | 2          | 2      | 5.399E7 | 234   | 25.9     | 6.68     |
| Q9VMU7    | CG14036-PA OS=Drosophila melanogaster GN=CG14036-RA PE=2 SV=1 - [Q9VMU7_DROME]                                          | 2.21  | 12.90    | 1          | 1                 | 1          | 1      | 5.019E7 | 93    | 11.0     | 7.78     |
| Q8IN71    | Anoctamin OS=Drosophila melanogaster GN=subdued PE=3 SV=1 - [Q8IN71_DROME]                                              | 2.20  | 3.56     | 2          | 2                 | 2          | 2      | 8.151E6 | 926   | 107.5    | 6.92     |
| O02002    | Caspase-1 OS=Drosophila melanogaster GN=Dcp-1 PE=1 SV=1 - [CASP1_DROME]                                                 | 2.20  | 9.91     | 1          | 2                 | 2          | 2      | 1.017E7 | 323   | 35.9     | 7.74     |
| P49905    | Transcription initiation factor TFIID subunit 12 OS=Drosophila melanogaster GN=Taf12 PE=1 SV=1 - [TAF12_DROME]          | 2.20  | 10.71    | 1          | 1                 | 1          | 1      | 4.611E6 | 196   | 21.5     | 7.12     |
| Q9V677    | Proteasome-associated protein ECM29 homolog OS=Drosophila melanogaster GN=CG8858 PE=1 SV=1 - [ECM29_DROME]              | 2.20  | 1.96     | 1          | 2                 | 2          | 2      | 9.212E6 | 1890  | 212.0    | 6.86     |
| Q9VLT5    | Protein purity of essence OS=Drosophila melanogaster GN=poe PE=1 SV=1 - [POE_DROME]                                     | 2.20  | 1.09     | 1          | 3                 | 3          | 3      | 5322    | 590.3 | 6.38     |          |
| Q9VVA1    | CG9706, isoform B OS=Drosophila melanogaster GN=CG9706-RA PE=2 SV=1 - [Q9VVA1_DROME]                                    | 2.20  | 1.90     | 1          | 1                 | 1          | 1      | 5.473E6 | 525   | 59.1     | 8.12     |
| Q9VVI9    | Charged multivesicular body protein 5 OS=Drosophila melanogaster GN=CG6259 PE=1 SV=2 - [CHMP5_DROME]                    | 2.20  | 14.60    | 1          | 2                 | 2          | 2      | 1.168E7 | 226   | 25.1     | 4.75     |
| Q9W4U2    | CG3603, isoform B OS=Drosophila melanogaster GN=CG3603 PE=2 SV=2 - [Q9W4U2_DROME]                                       | 2.20  | 10.44    | 1          | 2                 | 2          | 2      | 7.903E7 | 249   | 26.2     | 7.80     |
| P07183    | Chorion protein S38 OS=Drosophila melanogaster GN=Cp38 PE=2 SV=1 - [CH38_DROME]                                         | 2.19  | 26.14    | 1          | 3                 | 3          | 6      | 1.153E8 | 306   | 30.4     | 9.13     |
| Q9W1I8    | Synaptoosomal-associated protein OS=Drosophila melanogaster GN=Snap29 PE=2 SV=1 - [Q9W1I8_DROME]                        | 2.19  | 4.58     | 1          | 1                 | 1          | 1      | 2.857E7 | 284   | 31.6     | 5.17     |
| O46050    | CG3460-PA OS=Drosophila melanogaster GN=Nmd3 PE=2 SV=1 - [O46050_DROME]                                                 | 2.18  | 4.61     | 1          | 2                 | 2          | 2      | 1.826E7 | 521   | 59.1     | 6.06     |
| Q9VKB4    | Probable ribosome production factor 1 OS=Drosophila melanogaster GN=CG6712 PE=2 SV=1 - [RPF1_DROME]                     | 2.17  | 3.81     | 1          | 1                 | 1          | 1      | 1.891E7 | 394   | 46.0     | 6.70     |
| Q9VLU0    | Barrier-to-autointegration factor OS=Drosophila melanogaster GN=baf PE=3 SV=1 - [BAF_DROME]                             | 2.17  | 27.78    | 1          | 2                 | 2          | 3      | 7.985E7 | 90    | 10.1     | 5.16     |
| Q9VQ58    | CG15356 OS=Drosophila melanogaster GN=CG15356-RA PE=2 SV=1 - [Q9VQ58_DROME]                                             | 2.16  | 1.96     | 1          | 1                 | 1          | 1      | 1023    | 108.1 | 9.44     |          |
| Q0K100    | FI20034p1 OS=Drosophila melanogaster GN=SP1029 PE=2 SV=1 - [Q0K100_DROME]                                               | 2.16  | 1.72     | 1          | 1                 | 1          | 1      | 932     | 108.0 | 6.60     |          |
| Q9VT75    | CG11989-PA, isoform A OS=Drosophila melanogaster GN=vnc PE=2 SV=1 - [Q9VT75_DROME]                                      | 2.16  | 15.31    | 1          | 3                 | 3          | 4      | 1.791E7 | 196   | 22.3     | 6.95     |
| P22465    | Annexin B10 OS=Drosophila melanogaster GN=AnxB10 PE=2 SV=3 - [ANX10_DROME]                                              | 2.16  | 7.48     | 1          | 2                 | 2          | 3      | 7.228E7 | 321   | 35.7     | 4.77     |
| Q9VVK1    | CG13097 OS=Drosophila melanogaster GN=CG13097 PE=2 SV=1 - [Q9VVK1_DROME]                                                | 2.15  | 3.32     | 1          | 1                 | 1          | 1      | 2.254E7 | 662   | 76.1     | 4.74     |
| M9PH72    | CG42324, isoform I OS=Drosophila melanogaster GN=CG14972 PE=4 SV=1 - [M9PH72_DROME]                                     | 2.15  | 2.17     | 4          | 1                 | 1          | 1      | 923     | 100.2 | 6.00     |          |
| Q9VYG8    | CG15717, isoform A OS=Drosophila melanogaster GN=CG15717 PE=2 SV=1 - [Q9VYG8_DROME]                                     | 2.15  | 3.97     | 1          | 1                 | 1          | 1      | 4.399E7 | 252   | 27.7     | 6.29     |
| Q8IPJ2    | CG17378, isoform C OS=Drosophila melanogaster GN=CG17378 PE=4 SV=1 - [Q8IPJ2_DROME]                                     | 2.15  | 4.81     | 2          | 1                 | 1          | 1      | 561     | 62.3  | 8.18     |          |
| Q9VJ59    | Jwa ortholog OS=Drosophila melanogaster GN=Jwa PE=4 SV=5 - [Q9VJ59_DROME]                                               | 2.15  | 4.42     | 1          | 1                 | 1          | 1      | 249     | 27.8  | 9.99     |          |
| M9PC31    | CG3714, isoform G OS=Drosophila melanogaster GN=CG3714 PE=4 SV=1 - [M9PC31_DROME]                                       | 2.14  | 2.00     | 3          | 1                 | 1          | 1      | 2.998E7 | 550   | 61.5     | 6.71     |

| Accession | Description                                                                                                               | Score | Coverage | # Proteins | # Unique Peptides | # Peptides | # PSMs | Area    | # AAs | MW [kDa] | calc. pI |
|-----------|---------------------------------------------------------------------------------------------------------------------------|-------|----------|------------|-------------------|------------|--------|---------|-------|----------|----------|
| Q9VRJ9    | Ubiquitin thioesterase OTU1 OS=Drosophila melanogaster GN=CG4603 PE=2 SV=1 - [OTU1_DROME]                                 | 2.14  | 3.46     | 2          | 1                 | 1          | 1      |         | 347   | 37.8     | 4.82     |
| Q8MS38    | CG33217-PA OS=Drosophila melanogaster GN=CG33217 PE=2 SV=1 - [Q8MS38_DROME]                                               | 2.14  | 7.44     | 1          | 3                 | 3          | 3      |         | 699   | 79.9     | 8.10     |
| P40688    | Protein swallow OS=Drosophila melanogaster GN=swa PE=1 SV=1 - [SWA_DROME]                                                 | 2.14  | 1.82     | 1          | 1                 | 1          | 1      | 1.997E7 | 548   | 62.0     | 6.14     |
| Q71ZF5    | RE34924p OS=Drosophila melanogaster GN=Rpb5 PE=2 SV=1 - [Q71ZF5_DROME]                                                    | 2.14  | 4.29     | 1          | 1                 | 1          | 1      | 1.367E7 | 210   | 24.5     | 6.15     |
| Q9VZW7    | CG2107 OS=Drosophila melanogaster GN=CG2107 PE=3 SV=1 - [Q9VZW7_DROME]                                                    | 2.14  | 1.80     | 1          | 1                 | 1          | 1      | 1.020E7 | 667   | 75.1     | 8.35     |
| Q7KVP4    | CG9485, isoform A OS=Drosophila melanogaster GN=CG9485 PE=4 SV=1 - [Q7KVP4_DROME]                                         | 2.13  | 1.04     | 4          | 1                 | 1          | 1      | 1.193E7 | 1542  | 173.5    | 6.47     |
| Q27884    | Serine/threonine-protein phosphatase 6 catalytic subunit OS=Drosophila melanogaster GN=PpV PE=2 SV=1 - [PPP6_DROME]       | 2.12  | 3.30     | 1          | 1                 | 1          | 1      | 1.353E7 | 303   | 34.7     | 5.71     |
| P27864    | Recombination repair protein 1 OS=Drosophila melanogaster GN=Rrp1 PE=1 SV=2 - [RRP1_DROME]                                | 2.12  | 3.39     | 2          | 1                 | 1          | 1      | 5.219E6 | 679   | 74.6     | 8.98     |
| Q24050    | Anon-i1 protein OS=Drosophila melanogaster GN=anon-i1 PE=2 SV=1 - [Q24050_DROME]                                          | 2.12  | 3.44     | 1          | 1                 | 1          | 1      | 1.620E7 | 262   | 28.9     | 4.82     |
| A1Z8L8    | CG7777, isoform A OS=Drosophila melanogaster GN=CG7777 PE=3 SV=1 - [A1Z8L8_DROME]                                         | 2.12  | 3.79     | 2          | 1                 | 1          | 1      | 6.643E7 | 264   | 28.4     | 7.15     |
| Q9W0M4    | CG13887, isoform C OS=Drosophila melanogaster GN=CG13887 PE=2 SV=1 - [Q9W0M4_DROME]                                       | 2.12  | 10.96    | 1          | 2                 | 2          | 3      | 2.186E7 | 228   | 26.1     | 9.32     |
| Q9VSC1    | Signal recognition particle 9 kDa protein OS=Drosophila melanogaster GN=Srp9 PE=3 SV=1 - [SRP09_DROME]                    | 2.12  | 16.88    | 1          | 1                 | 1          | 1      | 2.895E7 | 77    | 9.0      | 8.46     |
| Q9V9W7    | Rough deal OS=Drosophila melanogaster GN=rod PE=4 SV=2 - [Q9V9W7_DROME]                                                   | 2.11  | 0.48     | 1          | 1                 | 1          | 1      |         | 2089  | 239.5    | 6.15     |
| Q9W197    | 7-methylguanosine phosphate-specific 5'-nucleotidase OS=Drosophila melanogaster GN=CG3362 PE=1 SV=1 - [5NT3B_DROME]       | 2.11  | 2.82     | 1          | 1                 | 1          | 1      |         | 319   | 36.3     | 5.44     |
| A1Z618    | Maleless OS=Drosophila melanogaster GN=mle PE=4 SV=1 - [A1Z618_DROME]                                                     | 2.11  | 15.04    | 2          | 2                 | 2          | 2      | 3.666E6 | 226   | 25.0     | 7.27     |
| Q9VD26    | Zinc finger protein-like 1 homolog OS=Drosophila melanogaster GN=CG5382 PE=1 SV=1 - [ZFPL1_DROME]                         | 2.11  | 4.68     | 1          | 1                 | 1          | 1      | 3.520E6 | 299   | 33.5     | 8.53     |
| Q9VT68    | CG6707, isoform B OS=Drosophila melanogaster GN=CG6707 PE=4 SV=2 - [Q9VT68_DROME]                                         | 2.11  | 4.33     | 2          | 1                 | 1          | 1      | 7.287E7 | 231   | 25.2     | 8.95     |
| P48603    | F-actin-capping protein subunit beta OS=Drosophila melanogaster GN=cpb PE=2 SV=1 - [CAPZB_DROME]                          | 2.10  | 7.25     | 1          | 1                 | 1          | 1      |         | 276   | 31.3     | 5.44     |
| A1ZAW5    | Methylosome subunit pICln OS=Drosophila melanogaster GN=icln PE=1 SV=1 - [ICLN_DROME]                                     | 2.10  | 5.58     | 1          | 1                 | 1          | 1      | 5.498E7 | 215   | 23.7     | 4.12     |
| Q02427    | RNA-binding protein 1 OS=Drosophila melanogaster GN=Rbp1 PE=2 SV=3 - [RBP1_DROME]                                         | 2.09  | 14.58    | 3          | 2                 | 2          | 2      | 1.747E8 | 144   | 16.0     | 9.98     |
| Q9VE86    | Werner Syndrome-like exonuclease OS=Drosophila melanogaster GN=WRNexo PE=1 SV=2 - [WRNXO_DROME]                           | 2.09  | 3.68     | 2          | 1                 | 1          | 1      | 4.497E6 | 353   | 40.3     | 9.09     |
| Q24151    | Signal transducer and transcription activator OS=Drosophila melanogaster GN=Stat92E PE=1 SV=1 - [STAT_DROME]              | 2.09  | 2.10     | 1          | 1                 | 1          | 1      |         | 761   | 86.4     | 6.14     |
| Q94524    | Dynein light chain Tctex-type OS=Drosophila melanogaster GN=Dlc90F PE=1 SV=1 - [DYLT_DROME]                               | 2.09  | 16.22    | 1          | 1                 | 1          | 1      |         | 111   | 12.5     | 5.16     |
| Q9VJE3    | CG15141 OS=Drosophila melanogaster GN=CG15141 PE=2 SV=1 - [Q9VJE3_DROME]                                                  | 2.09  | 3.22     | 1          | 1                 | 1          | 1      |         | 404   | 45.9     | 4.93     |
| Q9V3D9    | BcDNA.GM09489 OS=Drosophila melanogaster GN=Srp54k PE=2 SV=1 - [Q9V3D9_DROME]                                             | 2.09  | 1.97     | 1          | 1                 | 1          | 1      |         | 508   | 55.8     | 8.70     |
| Q9VF08    | Mitochondrial import inner membrane translocase subunit Tim16 OS=Drosophila melanogaster GN=blp PE=2 SV=1 - [TIM16_DROME] | 2.08  | 12.06    | 1          | 1                 | 1          | 1      | 2.225E7 | 141   | 15.7     | 9.60     |
| Q7K1C3    | CG6984 OS=Drosophila melanogaster GN=CG6984 PE=2 SV=1 - [Q7K1C3_DROME]                                                    | 2.08  | 5.61     | 1          | 1                 | 1          | 1      | 3.559E6 | 285   | 31.1     | 8.35     |
| Q9VJ74    | CG10333 OS=Drosophila melanogaster GN=CG10333 PE=2 SV=2 - [Q9VJ74_DROME]                                                  | 2.08  | 4.14     | 1          | 2                 | 2          | 2      | 1.241E8 | 822   | 94.5     | 9.47     |
| Q9W3Y0    | Zinc finger protein 593 homolog OS=Drosophila melanogaster GN=CG3224 PE=2 SV=1 - [ZN593_DROME]                            | 2.08  | 12.35    | 1          | 1                 | 1          | 1      |         | 162   | 18.9     | 9.67     |
| E1JHY0    | CG5946, isoform E OS=Drosophila melanogaster GN=CG5946 PE=4 SV=1 - [E1JHY0_DROME]                                         | 2.08  | 4.94     | 6          | 1                 | 1          | 1      | 4.101E7 | 263   | 29.7     | 9.55     |
| Q9VTH0    | Procollagen lysyl hydroxylase, isoform A OS=Drosophila melanogaster GN=Plod PE=4 SV=1 - [Q9VTH0_DROME]                    | 2.07  | 3.61     | 1          | 2                 | 2          | 2      | 1.520E7 | 721   | 82.5     | 5.68     |
| Q9VC93    | Dis3 OS=Drosophila melanogaster GN=Dis3 PE=3 SV=1 - [Q9VC93_DROME]                                                        | 2.07  | 1.83     | 1          | 1                 | 1          | 1      |         | 982   | 112.1    | 6.68     |
| Q9I7J0    | CG5023 OS=Drosophila melanogaster GN=CG5023 PE=2 SV=1 - [Q9I7J0_DROME]                                                    | 2.07  | 7.10     | 1          | 1                 | 1          | 1      | 1.965E7 | 169   | 19.1     | 8.13     |
| Q9VW12    | UPF0389 protein CG9231 OS=Drosophila melanogaster GN=CG9231 PE=1 SV=1 - [U389_DROME]                                      | 2.07  | 32.80    | 1          | 3                 | 3          | 3      | 4.280E7 | 125   | 14.1     | 10.07    |
| Q9VCG4    | Nucleoporin Ndc1 OS=Drosophila melanogaster GN=Ndc1 PE=1 SV=1 - [NDC1_DROME]                                              | 2.07  | 3.98     | 1          | 2                 | 2          | 2      | 5.405E7 | 578   | 65.3     | 8.37     |
| Q8I0J3    | Mitochondrial ribosomal protein S21 OS=Drosophila melanogaster GN=mRpS21 PE=2 SV=1 - [Q8I0J3_DROME]                       | 2.07  | 16.09    | 1          | 1                 | 1          | 1      | 1.881E7 | 87    | 10.6     | 10.08    |
| Q960T2    | Synapse-associated protein of 47 kDa OS=Drosophila melanogaster GN=Sap47 PE=1 SV=1 - [SAP47_DROME]                        | 2.07  | 2.90     | 1          | 1                 | 1          | 1      |         | 551   | 56.9     | 4.56     |
| A1Z9A2    | UPF0587 protein CG4646 OS=Drosophila melanogaster GN=CG4646 PE=2 SV=1 - [U587_DROME]                                      | 2.06  | 7.98     | 1          | 1                 | 1          | 1      | 7.986E6 | 163   | 18.6     | 4.96     |
| Q9VYT3    | CG2025 OS=Drosophila melanogaster GN=CG2025 PE=3 SV=2 - [Q9VYT3_DROME]                                                    | 2.05  | 2.70     | 1          | 3                 | 3          | 4      | 2.204E7 | 1147  | 132.7    | 5.15     |
| Q9VWE6    | Protein ELYS homolog OS=Drosophila melanogaster GN=CG14215 PE=1 SV=2 - [ELYS_DROME]                                       | 2.05  | 0.76     | 1          | 1                 | 1          | 1      |         | 2111  | 235.0    | 5.33     |
| Q8MT06    | Guanine nucleotide-binding protein-like 3 homolog OS=Drosophila melanogaster GN=Ns1 PE=1 SV=2 - [GNL3_DROME]              | 2.05  | 7.57     | 1          | 3                 | 3          | 5      | 3.144E7 | 581   | 65.9     | 9.36     |
| M9PGB6    | CG7519, isoform B OS=Drosophila melanogaster GN=CG7519 PE=4 SV=1 - [M9PGB6_DROME]                                         | 2.05  | 8.61     | 2          | 1                 | 1          | 1      |         | 151   | 17.6     | 5.27     |
| Q9W114    | CG12848 OS=Drosophila melanogaster GN=CG12848 PE=2 SV=2 - [Q9W114_DROME]                                                  | 2.04  | 13.33    | 1          | 1                 | 1          | 1      |         | 120   | 13.7     | 9.11     |
| Q09147    | Fibroblast growth factor receptor homolog 2 OS=Drosophila melanogaster GN=btI PE=2 SV=3 - [FGFR2_DROME]                   | 2.04  | 0.76     | 1          | 1                 | 1          | 2      | 2.241E8 | 1052  | 117.7    | 6.28     |
| A1Z7K8    | CG8235 OS=Drosophila melanogaster GN=CG8235 PE=4 SV=1 - [A1Z7K8_DROME]                                                    | 2.04  | 2.79     | 1          | 1                 | 1          | 1      | 5.218E7 | 323   | 34.4     | 8.91     |
| Q8INE8    | Arginine methyltransferase 3, isoform B OS=Drosophila melanogaster GN=Art3 PE=2 SV=1 - [Q8INE8_DROME]                     | 2.04  | 3.59     | 2          | 1                 | 1          | 2      | 5.533E6 | 474   | 54.2     | 5.08     |
| Q9W3B2    | CG10648-PA OS=Drosophila melanogaster GN=Rbm13 PE=2 SV=1 - [Q9W3B2_DROME]                                                 | 2.04  | 3.79     | 1          | 1                 | 1          | 1      |         | 343   | 40.6     | 4.89     |
| Q7K4N3    | Nuclear cap-binding protein subunit 1 OS=Drosophila melanogaster GN=Cbp80 PE=1 SV=1 - [NCBP1_DROME]                       | 2.03  | 2.63     | 1          | 1                 | 1          | 1      | 2.200E7 | 800   | 93.2     | 6.55     |
| Q7K5Q0    | CG6782, isoform A OS=Drosophila melanogaster GN=sea PE=2 SV=1 - [Q7K5Q0_DROME]                                            | 2.03  | 2.52     | 1          | 1                 | 1          | 1      | 7.831E7 | 317   | 34.1     | 9.42     |
| M9NE07    | CG9132, isoform C OS=Drosophila melanogaster GN=CG9132 PE=4 SV=1 - [M9NE07_DROME]                                         | 2.03  | 7.35     | 2          | 1                 | 1          | 1      | 1.614E7 | 204   | 21.6     | 8.09     |



| Accession | Description                                                                                                                        | Score | Coverage | # Proteins | # Unique Peptides | # Peptides | # PSMs | Area    | # AAs | MW [kDa] | calc. pI |
|-----------|------------------------------------------------------------------------------------------------------------------------------------|-------|----------|------------|-------------------|------------|--------|---------|-------|----------|----------|
| Q9V3Q4    | CG1274-PA, isoform A OS=Drosophila melanogaster GN=Jafrac2 PE=2 SV=1 - [Q9V3Q4_DROME]                                              | 2.03  | 7.44     | 1          | 1                 | 1          | 2      | 1.823E7 | 242   | 26.7     | 6.80     |
| M9NEW0    | CG43346, isoform A OS=Drosophila melanogaster GN=CG43346 PE=2 SV=1 - [M9NEW0_DROME]                                                | 2.03  | 8.00     | 1          | 1                 | 1          | 1      |         | 150   | 17.6     | 8.95     |
| Q9VSL6    | Glutathione S transferase O1 OS=Drosophila melanogaster GN=GstO1 PE=2 SV=1 - [Q9VSL6_DROME]                                        | 2.03  | 4.33     | 1          | 1                 | 1          | 1      | 2.233E7 | 254   | 30.0     | 7.44     |
| E1JHV7    | Enhancer of bithorax, isoform F OS=Drosophila melanogaster GN=E(bx) PE=4 SV=1 - [E1JHV7_DROME]                                     | 2.03  | 0.65     | 5          | 1                 | 1          | 1      | 5.022E6 | 2139  | 239.3    | 9.09     |
| Q9VYY3    | Ubiquitin-like modifier-activating enzyme 5 OS=Drosophila melanogaster GN=CG1749 PE=2 SV=1 - [UBA5_DROME]                          | 2.02  | 4.70     | 1          | 1                 | 1          | 1      | 1.245E7 | 404   | 44.1     | 4.73     |
| Q86D34    | CG33203, isoform B OS=Drosophila melanogaster GN=CG14522 PE=2 SV=1 - [Q86D34_DROME]                                                | 2.02  | 6.44     | 2          | 1                 | 1          | 1      |         | 450   | 47.8     | 6.96     |
| Q95U20    | GH13793p OS=Drosophila melanogaster GN=Opa1 PE=2 SV=1 - [Q95U20_DROME]                                                             | 2.02  | 1.50     | 2          | 1                 | 1          | 1      | 8.040E7 | 933   | 107.1    | 8.94     |
| Q95T12    | Calcium channel flower OS=Drosophila melanogaster GN=fwe PE=1 SV=1 - [FLOWR_DROME]                                                 | 2.02  | 9.28     | 1          | 1                 | 1          | 1      | 1.337E7 | 194   | 20.6     | 6.51     |
| O18405    | Surfeit locus protein 4 homolog OS=Drosophila melanogaster GN=Surf4 PE=2 SV=1 - [SURF4_DROME]                                      | 2.02  | 4.07     | 1          | 1                 | 1          | 1      | 1.991E7 | 270   | 30.5     | 8.97     |
| Q9VW09    | E3 ubiquitin-protein ligase listerin OS=Drosophila melanogaster GN=l(3)76BDr PE=1 SV=2 - [LTN1_DROME]                              | 2.01  | 0.74     | 1          | 1                 | 1          | 1      |         | 1747  | 198.5    | 5.94     |
| A1Z9J6    | Mitochondrial ribosomal protein L53 OS=Drosophila melanogaster GN=mRpL53 PE=2 SV=1 - [A1Z9J6_DROME]                                | 2.01  | 5.16     | 1          | 1                 | 1          | 1      | 1.547E7 | 155   | 16.9     | 10.01    |
| Q8T481    | AT11343p OS=Drosophila melanogaster GN=CG32022 PE=2 SV=1 - [Q8T481_DROME]                                                          | 2.01  | 9.55     | 1          | 1                 | 1          | 1      |         | 178   | 19.8     | 9.85     |
| Q960Z4    | Arrest, isoform E OS=Drosophila melanogaster GN=aret PE=2 SV=1 - [Q960Z4_DROME]                                                    | 2.01  | 7.62     | 5          | 3                 | 3          | 3      | 1.751E7 | 604   | 64.1     | 7.65     |
| Q9V3F9    | BcDNA.LD28120 OS=Drosophila melanogaster GN=out PE=2 SV=1 - [Q9V3F9_DROME]                                                         | 2.00  | 1.98     | 1          | 1                 | 1          | 1      | 2.469E6 | 655   | 72.9     | 8.91     |
| Q9VE94    | CG18600 OS=Drosophila melanogaster GN=CG18600 PE=2 SV=1 - [Q9VE94_DROME]                                                           | 2.00  | 2.34     | 1          | 1                 | 1          | 1      |         | 384   | 43.7     | 8.24     |
| Q9W3T2    | CG4593, isoform A OS=Drosophila melanogaster GN=CG4593-RA PE=2 SV=1 - [Q9W3T2_DROME]                                               | 2.00  | 14.83    | 1          | 2                 | 2          | 4      | 5.752E7 | 209   | 24.8     | 6.57     |
| Q9VAW3    | GH12731p OS=Drosophila melanogaster GN=Gfat2 PE=2 SV=1 - [Q9VAW3_DROME]                                                            | 1.99  | 1.46     | 1          | 1                 | 1          | 1      | 7.974E6 | 683   | 76.5     | 6.62     |
| A1Z6H4    | RE52822p OS=Drosophila melanogaster GN=vlc PE=2 SV=1 - [A1Z6H4_DROME]                                                              | 1.98  | 2.57     | 3          | 1                 | 1          | 1      | 1.630E7 | 583   | 63.6     | 6.21     |
| X2JF15    | Radish, isoform L OS=Drosophila melanogaster GN=rad PE=4 SV=1 - [X2JF15_DROME]                                                     | 1.98  | 0.80     | 5          | 1                 | 1          | 1      | 1.224E7 | 1630  | 183.8    | 8.31     |
| Q9VVU6    | CG6841-PA OS=Drosophila melanogaster GN=CG6841 PE=2 SV=2 - [Q9VVU6_DROME]                                                          | 1.98  | 1.83     | 1          | 1                 | 1          | 1      |         | 931   | 105.2    | 7.44     |
| A8Y535    | Cytochrome b-c1 complex subunit 6 OS=Drosophila melanogaster GN=Uchr PE=3 SV=2 - [A8Y535_DROME]                                    | 1.98  | 10.59    | 1          | 1                 | 1          | 1      | 5.696E7 | 85    | 9.9      | 5.21     |
| O44437    | Small nuclear ribonucleoprotein Sm D3 OS=Drosophila melanogaster GN=Smd3 PE=1 SV=1 - [SMD3_DROME]                                  | 1.97  | 6.62     | 1          | 1                 | 1          | 1      | 1.783E8 | 151   | 15.6     | 10.54    |
| Q7KMJ6    | BcDNA.GH11110 OS=Drosophila melanogaster GN=nito PE=2 SV=1 - [Q7KMJ6_DROME]                                                        | 1.96  | 1.51     | 1          | 1                 | 1          | 1      | 9.659E6 | 793   | 89.0     | 9.38     |
| Q9VC06    | CG11771 OS=Drosophila melanogaster GN=CG11771 PE=2 SV=1 - [Q9VC06_DROME]                                                           | 1.96  | 1.37     | 1          | 1                 | 1          | 1      | 2.565E7 | 730   | 81.3     | 7.08     |
| Q9VQ35    | CG17642-PA OS=Drosophila melanogaster GN=mRpL48 PE=2 SV=1 - [Q9VQ35_DROME]                                                         | 1.96  | 6.63     | 1          | 1                 | 1          | 1      | 6.126E6 | 181   | 20.9     | 5.47     |
| Q9VB66    | Protein HGH1 homolog OS=Drosophila melanogaster GN=CG6073 PE=2 SV=2 - [HGH1_DROME]                                                 | 1.96  | 2.17     | 1          | 1                 | 1          | 1      | 1.131E8 | 369   | 41.8     | 4.97     |
| M9PC65    | CG34126, isoform D OS=Drosophila melanogaster GN=CG34126 PE=4 SV=1 - [M9PC65_DROME]                                                | 1.95  | 0.54     | 5          | 1                 | 1          | 1      | 1.142E8 | 1475  | 161.8    | 6.81     |
| Q7KTW9    | Asparagine synthetase OS=Drosophila melanogaster GN=asparagine-synthetase PE=2 SV=1 - [Q7KTW9_DROME]                               | 1.95  | 3.05     | 1          | 1                 | 1          | 1      |         | 558   | 63.2     | 6.49     |
| Q9VG76    | C-Myc-binding protein homolog OS=Drosophila melanogaster GN=CG17202 PE=2 SV=2 - [MYCBP_DROME]                                      | 1.95  | 3.87     | 1          | 1                 | 1          | 1      | 1.832E7 | 181   | 20.1     | 4.68     |
| Q7JV66    | CG1550 OS=Drosophila melanogaster GN=CG1550 PE=2 SV=1 - [Q7JV66_DROME]                                                             | 1.95  | 1.92     | 1          | 1                 | 1          | 1      | 8.447E6 | 626   | 72.5     | 5.16     |
| Q9VA81    | IP02765p OS=Drosophila melanogaster GN=mRpS18C PE=2 SV=2 - [Q9VA81_DROME]                                                          | 1.95  | 5.00     | 1          | 1                 | 1          | 1      | 8.683E6 | 140   | 16.2     | 9.07     |
| Q8MSU4    | Symplekin OS=Drosophila melanogaster GN=Sym PE=1 SV=1 - [SYMPK_DROME]                                                              | 1.95  | 0.86     | 1          | 1                 | 1          | 1      |         | 1165  | 132.0    | 6.49     |
| Q9VVV7    | CG3808 OS=Drosophila melanogaster GN=CG3808 PE=4 SV=3 - [Q9VVV7_DROME]                                                             | 1.95  | 1.95     | 1          | 1                 | 1          | 1      |         | 615   | 68.6     | 6.23     |
| Q7K280    | Ribosomal RNA-processing protein 8 OS=Drosophila melanogaster GN=CG7137 PE=1 SV=1 - [RRP8_DROME]                                   | 1.94  | 3.35     | 1          | 1                 | 1          | 1      | 2.371E7 | 358   | 40.3     | 9.57     |
| Q9VSL4    | Glutathione S transferase O2, isoform B OS=Drosophila melanogaster GN=GstO2 PE=4 SV=2 - [Q9VSL4_DROME]                             | 1.94  | 6.80     | 1          | 2                 | 2          | 2      |         | 250   | 28.7     | 7.05     |
| P91927    | LETM1 and EF-hand domain-containing protein anon-60Da, mitochondrial OS=Drosophila melanogaster GN=Letm1 PE=2 SV=2 - [A60DA_DROME] | 1.93  | 1.48     | 1          | 1                 | 1          | 1      |         | 1013  | 113.5    | 6.84     |
| Q8WTC1    | 28S ribosomal protein S15, mitochondrial OS=Drosophila melanogaster GN=bonsai PE=2 SV=2 - [RT15_DROME]                             | 1.93  | 3.93     | 1          | 1                 | 1          | 1      | 5.954E7 | 280   | 33.5     | 9.20     |
| Q9VVM8    | CG5290-PA OS=Drosophila melanogaster GN=CG5290-RA PE=2 SV=1 - [Q9VVM8_DROME]                                                       | 1.93  | 1.75     | 1          | 2                 | 2          | 2      | 3.740E7 | 798   | 92.1     | 6.06     |
| M9PE02    | Female sterile (1) homeotic, isoform H OS=Drosophila melanogaster GN=fs(1)h PE=4 SV=1 - [M9PE02_DROME]                             | 1.92  | 2.17     | 5          | 1                 | 1          | 1      |         | 1105  | 109.9    | 9.29     |
| O77434    | EG:34F3.8 protein OS=Drosophila melanogaster GN=Sec22 PE=2 SV=2 - [O77434_DROME]                                                   | 1.91  | 6.64     | 2          | 1                 | 1          | 1      | 6.299E6 | 211   | 24.6     | 9.29     |
| A4V1Y7    | Trithorax-like, isoform C OS=Drosophila melanogaster GN=Trl PE=4 SV=1 - [A4V1Y7_DROME]                                             | 1.91  | 2.89     | 6          | 1                 | 1          | 1      |         | 519   | 54.8     | 8.03     |
| Q03042    | cGMP-dependent protein kinase, isozyme 1 OS=Drosophila melanogaster GN=Pkg21D PE=1 SV=2 - [KGP1_DROME]                             | 1.91  | 2.21     | 1          | 1                 | 1          | 1      |         | 768   | 86.7     | 6.42     |
| Q9VVK7    | NUCB1 OS=Drosophila melanogaster GN=NUCB1 PE=4 SV=3 - [Q9VVK7_DROME]                                                               | 1.90  | 4.57     | 1          | 2                 | 2          | 2      | 5.796E7 | 569   | 67.3     | 5.30     |
| Q9VGW4    | CG14692 OS=Drosophila melanogaster GN=CG14692 PE=4 SV=3 - [Q9VGW4_DROME]                                                           | 1.89  | 0.98     | 1          | 2                 | 2          | 2      | 1.955E7 | 2743  | 306.8    | 4.93     |
| Q23973    | Protein matrimony OS=Drosophila melanogaster GN=mtrm PE=1 SV=2 - [MTRM_DROME]                                                      | 1.89  | 5.99     | 1          | 1                 | 1          | 1      | 7.872E6 | 217   | 24.8     | 8.56     |
| Q9W127    | CG3663 OS=Drosophila melanogaster GN=CG3663 PE=2 SV=1 - [Q9W127_DROME]                                                             | 1.89  | 5.29     | 1          | 1                 | 1          | 1      | 6.045E7 | 208   | 23.3     | 7.69     |
| Q9W328    | Protein LST8 homolog OS=Drosophila melanogaster GN=Lst8 PE=2 SV=2 - [LST8_DROME]                                                   | 1.89  | 3.19     | 1          | 1                 | 1          | 1      | 3.646E7 | 313   | 35.3     | 7.17     |
| Q9VJ11    | CG10470-PA OS=Drosophila melanogaster GN=CG10470 PE=2 SV=1 - [Q9VJ11_DROME]                                                        | 1.88  | 4.37     | 1          | 1                 | 1          | 1      |         | 183   | 20.8     | 9.50     |
| Q9VTT2    | CG6801-PA OS=Drosophila melanogaster GN=l(3)2D3 PE=2 SV=1 - [Q9VTT2_DROME]                                                         | 1.88  | 2.30     | 1          | 1                 | 1          | 1      | 3.650E9 | 391   | 44.8     | 5.81     |
| Q7KNS3    | Lissencephaly-1 homolog OS=Drosophila melanogaster GN=Lis-1 PE=1 SV=2 - [LIS1_DROME]                                               | 1.88  | 2.68     | 1          | 1                 | 1          | 1      | 3.157E7 | 411   | 46.4     | 7.56     |

| Accession | Description                                                                                                        | Score | Coverage | # Proteins | # Unique Peptides | # Peptides | # PSMs | Area    | # AAs | MW [kDa] | calc. pI |
|-----------|--------------------------------------------------------------------------------------------------------------------|-------|----------|------------|-------------------|------------|--------|---------|-------|----------|----------|
| Q9VVZ4    | CG14095-PA OS=Drosophila melanogaster GN=CG14095 PE=4 SV=1 - [Q9VVZ4_DROME]                                        | 1.88  | 44.44    | 1          | 3                 | 3          | 5      | 9.140E7 | 162   | 15.9     | 9.92     |
| Q9Y011    | NuA4 complex subunit EAF3 homolog OS=Drosophila melanogaster GN=MRG15 PE=1 SV=1 - [EAF3_DROME]                     | 1.88  | 3.07     | 1          | 1                 | 1          | 1      | 3.642E7 | 424   | 47.2     | 8.13     |
| Q9VH85    | CG12950 OS=Drosophila melanogaster GN=CG12950 PE=1 SV=2 - [Q9VH85_DROME]                                           | 1.87  | 1.17     | 1          | 1                 | 1          | 1      | 6.774E7 | 939   | 102.8    | 6.64     |
| P40793    | Cdc42 homolog OS=Drosophila melanogaster GN=Cdc42 PE=1 SV=1 - [CDC42_DROME]                                        | 1.87  | 11.52    | 1          | 1                 | 2          | 2      | 1.422E8 | 191   | 21.4     | 7.14     |
| Q9VJ58    | Fas-associated factor, isoform A OS=Drosophila melanogaster GN=Faf PE=2 SV=1 - [Q9VJ58_DROME]                      | 1.87  | 3.45     | 1          | 1                 | 1          | 1      | 6.426E6 | 464   | 52.9     | 5.38     |
| Q7K010    | Tetraspanin OS=Drosophila melanogaster GN=Tsp42Ef PE=2 SV=1 - [Q7K010_DROME]                                       | 1.87  | 5.45     | 1          | 1                 | 1          | 1      |         | 220   | 24.7     | 5.86     |
| O01939    | Protein misato OS=Drosophila melanogaster GN=mst PE=2 SV=1 - [MST_DROME]                                           | 1.87  | 1.74     | 1          | 1                 | 1          | 1      | 8.913E6 | 574   | 64.7     | 5.03     |
| Q9V998    | Ubiquitin-like protein 5 OS=Drosophila melanogaster GN=ubl PE=3 SV=1 - [UBL5_DROME]                                | 1.87  | 16.44    | 1          | 1                 | 1          | 1      | 4.208E7 | 73    | 8.6      | 8.43     |
| Q9VM18    | Trehalose 6-phosphate phosphatase OS=Drosophila melanogaster GN=CG5177 PE=2 SV=1 - [Q9VM18_DROME]                  | 1.86  | 9.06     | 1          | 2                 | 2          | 2      | 2.399E7 | 276   | 31.2     | 7.12     |
| Q9V3U2    | H/ACA ribonucleoprotein complex subunit 2-like protein OS=Drosophila melanogaster GN=NHP2 PE=1 SV=1 - [NHP2_DROME] | 1.86  | 6.25     | 1          | 1                 | 1          | 2      | 3.464E8 | 160   | 17.7     | 8.10     |
| Q7K486    | Armadillo repeat-containing protein 6 homolog OS=Drosophila melanogaster GN=CG5721 PE=1 SV=1 - [ARMC6_DROME]       | 1.85  | 2.16     | 1          | 1                 | 1          | 1      | 3.235E7 | 464   | 51.3     | 5.55     |
| D2A6L6    | CG41056 (Fragment) OS=Drosophila melanogaster GN=CG41056 PE=4 SV=1 - [D2A6L6_DROME]                                | 1.85  | 1.06     | 1          | 1                 | 1          | 1      | 1.849E7 | 755   | 87.7     | 9.14     |
| Q9VDC9    | CG5871 OS=Drosophila melanogaster GN=Oga PE=2 SV=1 - [Q9VDC9_DROME]                                                | 1.85  | 1.18     | 1          | 1                 | 1          | 1      |         | 1019  | 113.8    | 4.88     |
| Q9VC48    | Methionine aminopeptidase 1 OS=Drosophila melanogaster GN=CG13630 PE=2 SV=1 - [Q9VC48_DROME]                       | 1.84  | 2.41     | 1          | 1                 | 1          | 1      | 4.478E7 | 374   | 41.7     | 6.93     |
| M9PBS9    | CG10103, isoform F OS=Drosophila melanogaster GN=CG10103 PE=4 SV=1 - [M9PBS9_DROME]                                | 1.83  | 3.06     | 6          | 1                 | 1          | 1      |         | 327   | 35.6     | 5.88     |
| P82711    | Probable cytochrome P450 6a19 OS=Drosophila melanogaster GN=Cyp6a19 PE=3 SV=1 - [C6A19_DROME]                      | 1.83  | 2.39     | 1          | 1                 | 1          | 1      | 3.582E6 | 503   | 57.7     | 8.94     |
| Q8T007    | CG6791, isoform B OS=Drosophila melanogaster GN=CG6791 PE=2 SV=1 - [Q8T007_DROME]                                  | 1.83  | 0.88     | 1          | 1                 | 1          | 1      |         | 1243  | 143.1    | 6.39     |
| A8JQT5    | CG34306 OS=Drosophila melanogaster GN=Cdep PE=4 SV=1 - [A8JQT5_DROME]                                              | 1.82  | 0.46     | 1          | 2                 | 2          | 2      | 3.793E7 | 3671  | 405.9    | 5.78     |
| Q8I059    | CG2118, isoform B OS=Drosophila melanogaster GN=CG2118 PE=2 SV=1 - [Q8I059_DROME]                                  | 1.82  | 1.74     | 2          | 1                 | 1          | 1      |         | 634   | 69.4     | 5.52     |
| P54358    | DNA polymerase delta catalytic subunit OS=Drosophila melanogaster GN=DNAPol-delta PE=2 SV=2 - [DPD01_DROME]        | 1.82  | 1.10     | 1          | 1                 | 1          | 1      | 4.760E6 | 1092  | 124.8    | 6.92     |
| Q7K2P3    | CG1648, isoform A OS=Drosophila melanogaster GN=CG1648 PE=2 SV=1 - [Q7K2P3_DROME]                                  | 1.82  | 12.61    | 2          | 2                 | 2          | 2      | 9.051E8 | 230   | 23.8     | 8.91     |
| Q0E9F9    | CG2915, isoform A OS=Drosophila melanogaster GN=CG2915-RB PE=2 SV=1 - [Q0E9F9_DROME]                               | 1.82  | 1.99     | 1          | 1                 | 1          | 1      |         | 453   | 51.0     | 6.13     |
| A1Z9K8    | LD13733p OS=Drosophila melanogaster GN=Prosap PE=2 SV=2 - [A1Z9K8_DROME]                                           | 1.81  | 0.37     | 1          | 1                 | 1          | 1      | 5.980E7 | 1871  | 198.9    | 8.44     |
| Q9W149    | CG11414 OS=Drosophila melanogaster GN=CG11414-RA PE=2 SV=1 - [Q9W149_DROME]                                        | 1.81  | 1.38     | 1          | 1                 | 1          | 1      |         | 867   | 95.9     | 8.82     |
| Q9V3D0    | LD33485p OS=Drosophila melanogaster GN=mRpl4 PE=2 SV=1 - [Q9V3D0_DROME]                                            | 1.81  | 5.74     | 1          | 1                 | 1          | 2      |         | 296   | 32.8     | 9.22     |
| Q9W3U0    | Acyl-coenzyme A oxidase OS=Drosophila melanogaster GN=CG4586 PE=2 SV=1 - [Q9W3U0_DROME]                            | 1.81  | 4.58     | 1          | 2                 | 2          | 2      |         | 677   | 76.6     | 8.91     |
| Q9VFC8    | Glucogen [starch] synthase OS=Drosophila melanogaster GN=GlyS PE=1 SV=2 - [GYS_DROME]                              | 1.81  | 1.69     | 1          | 1                 | 1          | 1      | 4.883E6 | 709   | 81.7     | 6.65     |
| P23647    | Serine/threonine-protein kinase fused OS=Drosophila melanogaster GN=fu PE=1 SV=2 - [FUSED_DROME]                   | 1.81  | 2.73     | 17         | 2                 | 2          | 2      | 1.206E7 | 805   | 90.3     | 6.67     |
| B7YZH7    | CG8446, isoform D OS=Drosophila melanogaster GN=CG8446-RD PE=2 SV=1 - [B7YZH7_DROME]                               | 1.81  | 25.71    | 1          | 1                 | 1          | 1      |         | 70    | 7.4      | 9.70     |
| Q59DZ1    | CG42313, isoform A OS=Drosophila melanogaster GN=CG42313 PE=1 SV=3 - [Q59DZ1_DROME]                                | 1.81  | 1.41     | 1          | 1                 | 1          | 2      | 2.000E7 | 1064  | 114.0    | 7.33     |
| Q9W2E7    | Rae1 OS=Drosophila melanogaster GN=Rae1 PE=4 SV=1 - [Q9W2E7_DROME]                                                 | 1.81  | 3.47     | 1          | 1                 | 1          | 1      | 9.016E7 | 346   | 38.6     | 7.58     |
| Q9VJ12    | Acinus, isoform A OS=Drosophila melanogaster GN=Acn PE=1 SV=1 - [Q9VJ12_DROME]                                     | 1.80  | 1.76     | 1          | 1                 | 1          | 1      | 1.099E8 | 739   | 83.7     | 6.70     |
| Q9VQY9    | Probable DNA replication complex GINS protein PSF2 OS=Drosophila melanogaster GN=Psf2 PE=2 SV=1 - [PSF2_DROME]     | 1.80  | 7.88     | 1          | 1                 | 1          | 1      |         | 203   | 23.1     | 6.39     |
| Q9VJ31    | CG10623 protein OS=Drosophila melanogaster GN=CG10623 PE=2 SV=1 - [Q9VJ31_DROME]                                   | 1.79  | 9.06     | 1          | 2                 | 2          | 2      | 8.363E6 | 331   | 36.7     | 5.11     |
| Q9VIM0    | CG2493, isoform A OS=Drosophila melanogaster GN=CG2493 PE=2 SV=1 - [Q9VIM0_DROME]                                  | 1.79  | 2.32     | 1          | 1                 | 1          | 1      | 3.230E7 | 475   | 53.7     | 5.71     |
| Q9VM75    | HEAT repeat-containing protein 1 homolog OS=Drosophila melanogaster GN=(2)k09022 PE=2 SV=2 - [HEAT1_DROME]         | 1.78  | 1.81     | 1          | 3                 | 3          | 3      | 1.645E6 | 2096  | 237.1    | 6.87     |
| Q9VGP6    | Prefoldin subunit 3 OS=Drosophila melanogaster GN=mgr PE=1 SV=3 - [PFD3_DROME]                                     | 1.78  | 4.64     | 1          | 1                 | 1          | 1      | 9.124E7 | 194   | 22.3     | 5.11     |
| P55824    | Probable ubiquitin carboxyl-terminal hydrolase FAF OS=Drosophila melanogaster GN=faf PE=1 SV=2 - [FAF_DROME]       | 1.78  | 0.43     | 1          | 1                 | 1          | 1      | 3.464E7 | 2778  | 310.9    | 6.05     |
| Q9W394    | CG32708-PA OS=Drosophila melanogaster GN=CG32708 PE=4 SV=1 - [Q9W394_DROME]                                        | 1.78  | 3.77     | 1          | 1                 | 1          | 1      |         | 239   | 27.5     | 9.77     |
| Q9V583    | CG7546, isoform B OS=Drosophila melanogaster GN=CG7546 PE=2 SV=3 - [Q9V583_DROME]                                  | 1.77  | 1.72     | 8          | 2                 | 2          | 2      | 3.253E7 | 1166  | 124.3    | 5.14     |
| Q9VYA7    | RRP12-like protein OS=Drosophila melanogaster GN=CG2691 PE=1 SV=2 - [RRP12_DROME]                                  | 1.77  | 3.25     | 1          | 3                 | 3          | 3      | 3.378E7 | 1384  | 153.5    | 8.78     |
| Q9VHX2    | CG3223 OS=Drosophila melanogaster GN=CG3223 PE=2 SV=1 - [Q9VHX2_DROME]                                             | 1.77  | 3.13     | 1          | 1                 | 1          | 1      | 9.890E6 | 415   | 45.1     | 5.25     |
| B7Z107    | CG42376, isoform A OS=Drosophila melanogaster GN=cin-RB PE=2 SV=1 - [B7Z107_DROME]                                 | 1.77  | 9.78     | 1          | 1                 | 1          | 1      |         | 92    | 11.0     | 8.69     |
| Q9VXK5    | Putative rRNA methyltransferase OS=Drosophila melanogaster GN=CG8939 PE=2 SV=1 - [Q9VXK5_DROME]                    | 1.75  | 1.84     | 1          | 1                 | 1          | 1      |         | 817   | 93.3     | 9.04     |
| Q9VGK7    | Putative elongator complex protein 1 OS=Drosophila melanogaster GN=Elp1 PE=1 SV=2 - [ELP1_DROME]                   | 1.74  | 0.88     | 1          | 1                 | 1          | 1      | 9.191E6 | 1252  | 142.7    | 6.43     |
| Q7K533    | CG11395 OS=Drosophila melanogaster GN=CG11395 PE=2 SV=1 - [Q7K533_DROME]                                           | 1.74  | 3.07     | 1          | 1                 | 1          | 1      | 1.731E7 | 456   | 48.8     | 6.73     |
| Q9W270    | Organic anion transporting polypeptide 58Db OS=Drosophila melanogaster GN=Oatp58Db PE=4 SV=2 - [Q9W270_DROME]      | 1.74  | 0.97     | 1          | 1                 | 1          | 1      | 2.842E7 | 722   | 80.1     | 7.90     |
| A1Z803    | CG1665 OS=Drosophila melanogaster GN=CG1665-RA PE=2 SV=1 - [A1Z803_DROME]                                          | 1.74  | 2.94     | 1          | 1                 | 1          | 1      | 1.535E7 | 340   | 38.1     | 8.54     |
| P32866    | G protein-coupled receptor kinase 2 OS=Drosophila melanogaster GN=Gprk2 PE=1 SV=3 - [GPRK2_DROME]                  | 1.73  | 4.48     | 1          | 2                 | 2          | 2      | 3.037E7 | 714   | 80.6     | 6.35     |
| Q9U9Q1    | Replication factor C 38kD subunit, isoform A OS=Drosophila melanogaster GN=RFC38 PE=4 SV=1 - [Q9U9Q1_DROME]        | 1.73  | 3.93     | 1          | 1                 | 1          | 1      | 3.366E7 | 356   | 40.8     | 8.40     |

| Accession | Description                                                                                                            | Score | Coverage | # Proteins | # Unique Peptides | # Peptides | # PSMs | Area    | # AAs | MW [kDa] | calc. pI |
|-----------|------------------------------------------------------------------------------------------------------------------------|-------|----------|------------|-------------------|------------|--------|---------|-------|----------|----------|
| F2FBA6    | Dorsal switch protein 1, isoform G OS=Drosophila melanogaster GN=Dsp1-RC PE=2 SV=1 - [F2FBA6_DROME]                    | 1.73  | 3.37     | 3          | 1                 | 1          | 2      | 4.617E7 | 386   | 44.0     | 8.43     |
| Q9W4Z5    | CG2854-PA OS=Drosophila melanogaster GN=EG:BACH48C10.2 PE=2 SV=2 - [Q9W4Z5_DROME]                                      | 1.73  | 2.24     | 1          | 1                 | 1          | 1      | 1.238E7 | 491   | 55.5     | 8.63     |
| Q9W4P5    | V-type proton ATPase subunit d 1 OS=Drosophila melanogaster GN=VhaAC39-1 PE=2 SV=1 - [VA0D1_DROME]                     | 1.73  | 3.14     | 1          | 1                 | 1          | 1      | 350     | 39.8  | 4.91     |          |
| Q8MYL1    | Fancd2 OS=Drosophila melanogaster GN=Fancd2 PE=2 SV=1 - [Q8MYL1_DROME]                                                 | 1.73  | 0.47     | 1          | 1                 | 1          | 1      | 4.592E6 | 1478  | 167.4    | 6.89     |
| Q9VAJ1    | Condensin complex subunit 1 OS=Drosophila melanogaster GN=Cap-D2 PE=2 SV=1 - [Q9VAJ1_DROME]                            | 1.73  | 0.51     | 1          | 1                 | 1          | 1      | 1380    | 157.4 | 5.86     |          |
| Q9VHB8    | CG8199 OS=Drosophila melanogaster GN=CG8199 PE=2 SV=1 - [Q9VHB8_DROME]                                                 | 1.73  | 12.98    | 1          | 3                 | 3          | 3      | 2.919E6 | 439   | 49.7     | 6.65     |
| Q86B87    | Modifier of mdg4 OS=Drosophila melanogaster GN=mod(mdg4) PE=1 SV=1 - [MMD4_DROME]                                      | 1.72  | 1.64     | 1          | 1                 | 1          | 1      | 5.511E6 | 610   | 67.1     | 5.07     |
| Q9VB05    | ALG-2 interacting protein X OS=Drosophila melanogaster GN=ALIX PE=1 SV=1 - [Q9VB05_DROME]                              | 1.72  | 5.02     | 1          | 3                 | 3          | 3      | 1.257E7 | 836   | 92.5     | 5.45     |
| Q961F9    | CG4729-PD, isoform D OS=Drosophila melanogaster GN=CG4729 PE=2 SV=1 - [Q961F9_DROME]                                   | 1.72  | 6.29     | 3          | 1                 | 1          | 1      | 1.452E7 | 143   | 16.1     | 8.85     |
| Q9VBX4    | CG31510 OS=Drosophila melanogaster GN=CG31510-RA PE=2 SV=2 - [Q9VBX4_DROME]                                            | 1.72  | 1.30     | 1          | 1                 | 1          | 1      | 7.030E6 | 1150  | 129.2    | 9.57     |
| Q6NLM8    | RE56731p OS=Drosophila melanogaster GN=sano PE=2 SV=1 - [Q6NLM8_DROME]                                                 | 1.72  | 1.67     | 1          | 1                 | 1          | 2      | 9.458E6 | 778   | 84.8     | 9.72     |
| Q8SZW5    | Alpha-Esterase-3, isoform A OS=Drosophila melanogaster GN=alpha-Est3 PE=2 SV=1 - [Q8SZW5_DROME]                        | 1.72  | 2.39     | 1          | 1                 | 1          | 1      | 543     | 61.4  | 6.80     |          |
| Q9VDE9    | FI04035p OS=Drosophila melanogaster GN=RhoGAP93B PE=2 SV=2 - [Q9VDE9_DROME]                                            | 1.72  | 1.43     | 1          | 1                 | 1          | 1      | 2.919E7 | 1330  | 146.2    | 8.34     |
| Q9VMY1    | Probable 39S ribosomal protein L24, mitochondrial OS=Drosophila melanogaster GN=mRpl24 PE=1 SV=1 - [RM24_DROME]        | 1.72  | 3.24     | 1          | 1                 | 1          | 1      | 247     | 29.2  | 9.38     |          |
| Q960X8    | Hepatocyte growth factor-regulated tyrosine kinase substrate OS=Drosophila melanogaster GN=Hrs PE=1 SV=1 - [HRS_DROME] | 1.71  | 1.71     | 1          | 1                 | 1          | 1      | 760     | 85.4  | 6.98     |          |
| Q2PDP2    | AT24894p OS=Drosophila melanogaster GN=CG31693 PE=2 SV=1 - [Q2PDP2_DROME]                                              | 1.71  | 1.65     | 2          | 1                 | 1          | 1      | 607     | 67.0  | 6.16     |          |
| Q9VBK9    | CG5913 OS=Drosophila melanogaster GN=CG5913 PE=4 SV=1 - [Q9VBK9_DROME]                                                 | 1.70  | 2.20     | 1          | 1                 | 1          | 1      | 2.003E6 | 454   | 49.9     | 9.70     |
| Q9VW53    | CG8025-PA OS=Drosophila melanogaster GN=Mtr3 PE=2 SV=1 - [Q9VW53_DROME]                                                | 1.69  | 3.07     | 1          | 1                 | 1          | 1      | 6.154E8 | 326   | 36.6     | 5.21     |
| Q9VM58    | CG10399, isoform A OS=Drosophila melanogaster GN=CG10399 PE=2 SV=2 - [Q9VM58_DROME]                                    | 1.69  | 4.02     | 1          | 1                 | 1          | 1      | 1.251E7 | 323   | 34.2     | 8.40     |
| Q9W1Y0    | CG3499 OS=Drosophila melanogaster GN=CG3499 PE=2 SV=1 - [Q9W1Y0_DROME]                                                 | 1.69  | 5.03     | 1          | 3                 | 3          | 3      | 1.587E7 | 736   | 80.6     | 8.57     |
| Q8IMG3    | CG1815, isoform B OS=Drosophila melanogaster GN=CG1815 PE=4 SV=1 - [Q8IMG3_DROME]                                      | 1.69  | 1.16     | 3          | 1                 | 1          | 1      | 1121    | 124.9 | 7.69     |          |
| Q8MR62    | Viral IAP-associated factor homolog OS=Drosophila melanogaster GN=viaf PE=1 SV=1 - [VIAF1_DROME]                       | 1.68  | 5.42     | 1          | 1                 | 1          | 1      | 240     | 27.4  | 4.86     |          |
| Q9VK44    | CG9934, isoform A OS=Drosophila melanogaster GN=CG9934 PE=2 SV=1 - [Q9VK44_DROME]                                      | 1.68  | 1.23     | 1          | 1                 | 1          | 1      | 1217    | 138.5 | 5.87     |          |
| Q8SY19    | CG1742-PA, isoform A OS=Drosophila melanogaster GN=Mgstl PE=2 SV=1 - [Q8SY19_DROME]                                    | 1.68  | 7.89     | 1          | 1                 | 1          | 2      | 3.901E7 | 152   | 16.9     | 9.99     |
| Q9VK28    | CG16974, isoform A OS=Drosophila melanogaster GN=CG16974 PE=2 SV=1 - [Q9VK28_DROME]                                    | 1.68  | 2.07     | 1          | 2                 | 2          | 2      | 1257    | 143.0 | 7.14     |          |
| Q9W2Y4    | CG2972, isoform B OS=Drosophila melanogaster GN=CG2972 PE=2 SV=2 - [Q9W2Y4_DROME]                                      | 1.68  | 1.69     | 1          | 1                 | 1          | 1      | 9.139E6 | 472   | 53.7     | 4.92     |
| A1ZBR2    | 18 wheeler OS=Drosophila melanogaster GN=18w PE=4 SV=1 - [A1ZBR2_DROME]                                                | 1.68  | 4.69     | 1          | 3                 | 3          | 3      | 5.368E7 | 1385  | 154.7    | 6.46     |
| Q8MLW2    | Domino, isoform D OS=Drosophila melanogaster GN=dom PE=4 SV=1 - [Q8MLW2_DROME]                                         | 1.68  | 0.50     | 2          | 1                 | 1          | 2      | 5.884E6 | 3183  | 348.2    | 8.87     |
| A4V2A4    | Mushroom-body expressed, isoform G OS=Drosophila melanogaster GN=mub PE=4 SV=1 - [A4V2A4_DROME]                        | 1.68  | 14.48    | 9          | 3                 | 3          | 5      | 5.195E7 | 359   | 37.9     | 8.51     |
| D0Z726    | MIP14975p OS=Drosophila melanogaster GN=Ntf-2 PE=2 SV=1 - [D0Z726_DROME]                                               | 1.67  | 8.99     | 4          | 1                 | 1          | 2      | 2.115E8 | 89    | 9.9      | 6.93     |
| Q9VCH8    | LD23303p OS=Drosophila melanogaster GN=tst PE=2 SV=2 - [Q9VCH8_DROME]                                                  | 1.66  | 1.34     | 1          | 1                 | 1          | 1      | 1.306E8 | 1197  | 135.7    | 7.01     |
| Q9Y162    | BcDNA.GH02678 OS=Drosophila melanogaster GN=Vps4 PE=2 SV=1 - [Q9Y162_DROME]                                            | 1.66  | 2.49     | 1          | 1                 | 1          | 1      | 3.076E7 | 442   | 49.6     | 6.96     |
| Q9VES8    | CG10340 OS=Drosophila melanogaster GN=CG10340 PE=2 SV=3 - [Q9VES8_DROME]                                               | 1.66  | 3.60     | 1          | 1                 | 1          | 1      | 2.191E7 | 278   | 32.0     | 6.55     |
| Q9VAJ2    | Bub3 OS=Drosophila melanogaster GN=Bub3 PE=2 SV=1 - [Q9VAJ2_DROME]                                                     | 1.66  | 4.29     | 1          | 1                 | 1          | 1      | 326     | 37.4  | 6.54     |          |
| P47949    | Troponin C, isoform 3 OS=Drosophila melanogaster GN=TpnC73F PE=2 SV=2 - [TNNC3_DROME]                                  | 1.65  | 47.74    | 2          | 6                 | 6          | 7      | 1.088E8 | 155   | 17.7     | 4.18     |
| Q94546    | Another transcription unit protein OS=Drosophila melanogaster GN=Atu PE=1 SV=2 - [ATU_DROME]                           | 1.65  | 0.97     | 1          | 1                 | 1          | 1      | 725     | 77.4  | 10.21    |          |
| Q8IPT1    | CG32441, isoform D OS=Drosophila melanogaster GN=CG32441 PE=4 SV=2 - [Q8IPT1_DROME]                                    | 1.65  | 3.74     | 2          | 1                 | 1          | 1      | 1.298E7 | 214   | 23.7     | 5.26     |
| Q9W2K8    | CG9418 OS=Drosophila melanogaster GN=Hmg-2 PE=2 SV=1 - [Q9W2K8_DROME]                                                  | 1.65  | 2.39     | 1          | 1                 | 1          | 1      | 2.853E7 | 376   | 41.7     | 9.38     |
| Q7KVA1    | Xylosyltransferase oxt OS=Drosophila melanogaster GN=oxt PE=2 SV=1 - [XYLT_DROME]                                      | 1.64  | 1.26     | 1          | 1                 | 1          | 1      | 876     | 99.0  | 8.10     |          |
| E1JJF9    | Neuroglian, isoform D OS=Drosophila melanogaster GN=Nrg PE=4 SV=1 - [E1JJF9_DROME]                                     | 1.64  | 1.94     | 3          | 2                 | 2          | 2      | 1.105E7 | 1239  | 138.3    | 5.49     |
| Q9VEP9    | CG16941 OS=Drosophila melanogaster GN=CG16941 PE=2 SV=1 - [Q9VEP9_DROME]                                               | 1.64  | 1.40     | 1          | 1                 | 1          | 1      | 2.962E7 | 784   | 88.0     | 6.37     |
| A8DY82    | Not1, isoform E OS=Drosophila melanogaster GN=Not1 PE=4 SV=1 - [A8DY82_DROME]                                          | 1.64  | 0.99     | 4          | 2                 | 2          | 2      | 1.292E7 | 2220  | 249.6    | 6.96     |
| Q9W199    | Mitochondrial ribosomal protein S17 OS=Drosophila melanogaster GN=mRpS17 PE=2 SV=1 - [Q9W199_DROME]                    | 1.64  | 5.16     | 1          | 1                 | 1          | 1      | 1.506E7 | 155   | 18.0     | 8.75     |
| Q9VG73    | Interleukin enhancer-binding factor 2 homolog OS=Drosophila melanogaster GN=CG5641 PE=2 SV=1 - [ILF2_DROME]            | 1.63  | 4.55     | 1          | 1                 | 1          | 2      | 7.338E6 | 396   | 43.6     | 6.93     |
| Q7K0H4    | SD07723p OS=Drosophila melanogaster GN=stj PE=2 SV=1 - [Q7K0H4_DROME]                                                  | 1.63  | 0.90     | 1          | 1                 | 1          | 1      | 8.390E6 | 1218  | 140.0    | 6.64     |
| Q61GW6    | CG34200 OS=Drosophila melanogaster GN=CG34200 PE=4 SV=1 - [Q61GW6_DROME]                                               | 1.63  | 17.31    | 1          | 1                 | 1          | 1      | 5.254E7 | 52    | 5.9      | 9.42     |
| Q9W0M1    | CG13889, isoform A OS=Drosophila melanogaster GN=CG13889 PE=4 SV=2 - [Q9W0M1_DROME]                                    | 1.63  | 0.35     | 1          | 1                 | 1          | 1      | 1978    | 227.8 | 5.54     |          |
| Q94517    | Histone deacetylase Rpd3 OS=Drosophila melanogaster GN=Rpd3 PE=1 SV=2 - [HDAC1_DROME]                                  | 1.63  | 1.54     | 1          | 1                 | 1          | 1      | 2.046E7 | 521   | 58.3     | 5.76     |
| Q9W1C5    | CG3173 OS=Drosophila melanogaster GN=IntS1 PE=4 SV=2 - [Q9W1C5_DROME]                                                  | 1.62  | 1.12     | 1          | 2                 | 2          | 2      | 1.035E8 | 2053  | 234.9    | 6.61     |
| Q9V3Y5    | BcDNA.LD23634 OS=Drosophila melanogaster GN=BcDNA.LD23634 PE=2 SV=1 - [Q9V3Y5_DROME]                                   | 1.62  | 1.20     | 1          | 1                 | 1          | 1      | 998     | 112.6 | 6.49     |          |

| Accession | Description                                                                                                                      | Score | Coverage | # Proteins | # Unique Peptides | # Peptides | # PSMs | Area    | # AAs | MW [kDa] | calc. pI |
|-----------|----------------------------------------------------------------------------------------------------------------------------------|-------|----------|------------|-------------------|------------|--------|---------|-------|----------|----------|
| Q9VXJ8    | CG8958 OS=Drosophila melanogaster GN=CG8958 PE=4 SV=2 - [Q9VXJ8_DROME]                                                           | 1.62  | 4.19     | 1          | 2                 | 2          | 2      | 2.100E7 | 621   | 71.0     | 5.74     |
| Q9VL63    | UPF0430 protein CG31712 OS=Drosophila melanogaster GN=CG31712 PE=1 SV=3 - [U430_DROME]                                           | 1.62  | 2.41     | 1          | 1                 | 1          | 1      | 1.374E6 | 290   | 35.5     | 9.91     |
| X2JE40    | Rho kinase, isoform C OS=Drosophila melanogaster GN=Rok PE=4 SV=1 - [X2JE40_DROME]                                               | 1.62  | 1.02     | 4          | 1                 | 1          | 1      | 2.759E7 | 1374  | 158.5    | 6.47     |
| Q9VPL3    | 39S ribosomal protein L10, mitochondrial OS=Drosophila melanogaster GN=mRpl10 PE=2 SV=1 - [RM10_DROME]                           | 1.62  | 6.05     | 1          | 1                 | 1          | 1      | 1.156E7 | 248   | 28.3     | 10.07    |
| Q8MSW9    | CG33505 OS=Drosophila melanogaster GN=U3-55K PE=2 SV=1 - [Q8MSW9_DROME]                                                          | 1.62  | 2.48     | 1          | 1                 | 1          | 1      | 2.166E7 | 484   | 53.3     | 8.73     |
| P92208    | Stress-activated protein kinase JNK OS=Drosophila melanogaster GN=bsk PE=1 SV=1 - [JNK_DROME]                                    | 1.61  | 2.15     | 3          | 1                 | 1          | 1      |         | 372   | 43.0     | 6.42     |
| Q7K2S6    | CG11509-PA OS=Drosophila melanogaster GN=CG11509 PE=2 SV=1 - [Q7K2S6_DROME]                                                      | 1.61  | 5.13     | 1          | 1                 | 1          | 1      | 3.083E8 | 117   | 13.5     | 10.14    |
| Q9W252    | DNA repair protein RAD50 OS=Drosophila melanogaster GN=rad50 PE=2 SV=4 - [RAD50_DROME]                                           | 1.61  | 4.02     | 1          | 2                 | 2          | 2      | 3.642E6 | 1318  | 152.1    | 7.58     |
| Q9VYI3    | Probable 39S ribosomal protein L49, mitochondrial OS=Drosophila melanogaster GN=mRpl49 PE=3 SV=1 - [RM49_DROME]                  | 1.61  | 5.59     | 1          | 1                 | 1          | 1      | 3.236E7 | 179   | 20.6     | 9.63     |
| Q0KHT4    | CG2371, isoform A OS=Drosophila melanogaster GN=CG2371 PE=4 SV=1 - [Q0KHT4_DROME]                                                | 1.61  | 2.99     | 4          | 1                 | 1          | 1      | 3.304E7 | 201   | 22.6     | 4.82     |
| Q9VZ45    | Myosin 10A, isoform C OS=Drosophila melanogaster GN=Myo10A PE=4 SV=3 - [Q9VZ45_DROME]                                            | 1.60  | 0.49     | 2          | 1                 | 1          | 1      |         | 3054  | 339.0    | 8.13     |
| Q9VZ12    | Activated Cdc42 kinase OS=Drosophila melanogaster GN=Ack PE=2 SV=2 - [Q9VZ12_DROME]                                              | 1.60  | 0.75     | 1          | 1                 | 1          | 1      | 1.459E7 | 1073  | 118.3    | 7.23     |
| Q9VRN4    | Blimp-1, isoform A OS=Drosophila melanogaster GN=Blimp-1 PE=2 SV=1 - [Q9VRN4_DROME]                                              | 1.60  | 1.50     | 2          | 1                 | 1          | 1      |         | 1203  | 133.2    | 7.39     |
| P12426    | Adenine phosphoribosyltransferase OS=Drosophila melanogaster GN=Aprt PE=2 SV=3 - [APT_DROME]                                     | 0.00  | 4.95     | 1          | 1                 | 1          | 1      | 1.089E7 | 182   | 19.7     | 5.69     |
| P45888    | Actin-related protein 2 OS=Drosophila melanogaster GN=Arp2 PE=2 SV=3 - [ARP2_DROME]                                              | 0.00  | 3.01     | 1          | 1                 | 1          | 2      | 3.189E7 | 399   | 45.3     | 6.02     |
| Q7JWD3    | ATPase ASNA1 homolog OS=Drosophila melanogaster GN=CG1598 PE=2 SV=1 - [ASNA_DROME]                                               | 0.00  | 5.65     | 1          | 2                 | 2          | 3      | 1.345E7 | 336   | 37.6     | 5.02     |
| Q5EAK6    | Serine/threonine-protein kinase ATM OS=Drosophila melanogaster GN=tefu PE=2 SV=1 - [ATM_DROME]                                   | 0.00  | 0.54     | 1          | 1                 | 1          | 1      |         | 2767  | 317.8    | 7.36     |
| Q9VKN7    | Aurora kinase B OS=Drosophila melanogaster GN=ial PE=1 SV=1 - [AURKB_DROME]                                                      | 0.00  | 6.08     | 1          | 1                 | 1          | 1      |         | 329   | 38.3     | 8.78     |
| P29746    | Protein bangles and beads OS=Drosophila melanogaster GN=bnb PE=1 SV=1 - [BNB_DROME]                                              | 0.00  | 2.71     | 1          | 1                 | 1          | 1      | 5.928E7 | 442   | 45.8     | 4.63     |
| Q9VZE6    | Ribosome biogenesis protein BRX1 homolog OS=Drosophila melanogaster GN=CG11583 PE=2 SV=2 - [BRX1_DROME]                          | 0.00  | 7.52     | 1          | 2                 | 2          | 6      | 1.536E7 | 359   | 41.6     | 9.89     |
| Q9VE01    | Probable cytochrome P450 12a5, mitochondrial OS=Drosophila melanogaster GN=Cyp12a5 PE=2 SV=1 - [C12A5_DROME]                     | 0.00  | 2.99     | 1          | 1                 | 1          | 1      |         | 536   | 61.3     | 9.20     |
| Q03017    | NF-kappa-B inhibitor cactus OS=Drosophila melanogaster GN=cact PE=1 SV=2 - [CACT_DROME]                                          | 0.00  | 2.60     | 1          | 1                 | 1          | 1      | 1.435E6 | 500   | 53.8     | 4.84     |
| P09085    | Homeotic protein caudal OS=Drosophila melanogaster GN=cad PE=1 SV=4 - [CAD_DROME]                                                | 0.00  | 5.62     | 2          | 1                 | 1          | 1      |         | 427   | 45.7     | 9.32     |
| Q9VT65    | Calpain-B OS=Drosophila melanogaster GN=CalpB PE=1 SV=2 - [CANB_DROME]                                                           | 0.00  | 3.57     | 1          | 1                 | 1          | 1      |         | 925   | 103.7    | 5.02     |
| P39205    | Molybdenum cofactor synthesis protein cinnamon OS=Drosophila melanogaster GN=cin PE=1 SV=3 - [CIN_DROME]                         | 0.00  | 2.16     | 1          | 1                 | 1          | 1      | 9.752E6 | 601   | 65.7     | 6.24     |
| Q01819    | Connectin OS=Drosophila melanogaster GN=Con PE=2 SV=2 - [CONN_DROME]                                                             | 0.00  | 3.96     | 2          | 1                 | 1          | 1      |         | 682   | 75.9     | 6.77     |
| P00408    | Cytochrome c oxidase subunit 2 OS=Drosophila melanogaster GN=mt:CoII PE=3 SV=1 - [COX2_DROME]                                    | 0.00  | 4.39     | 1          | 1                 | 1          | 1      | 3.113E8 | 228   | 26.2     | 5.10     |
| Q24478    | Centrosome-associated zinc finger protein CP190 OS=Drosophila melanogaster GN=Cp190 PE=1 SV=2 - [CP190_DROME]                    | 0.00  | 2.28     | 1          | 1                 | 1          | 1      |         | 1096  | 121.6    | 4.67     |
| Q9VYQ5    | Probable cytochrome P450 318a1 OS=Drosophila melanogaster GN=Cyp318a1 PE=2 SV=4 - [CP318_DROME]                                  | 0.00  | 4.29     | 1          | 1                 | 1          | 1      |         | 536   | 61.7     | 8.76     |
| P82713    | Probable cytochrome P450 309a2 OS=Drosophila melanogaster GN=Cyp309a2 PE=2 SV=2 - [CP392_DROME]                                  | 0.00  | 5.02     | 1          | 1                 | 1          | 1      |         | 538   | 62.3     | 9.22     |
| Q8MZC4    | Probable cardiolipin synthase OS=Drosophila melanogaster GN=CLS PE=2 SV=1 - [CRLS1_DROME]                                        | 0.00  | 1.86     | 1          | 1                 | 1          | 1      |         | 322   | 36.4     | 9.77     |
| Q8SYG2    | COP9 signalosome complex subunit 3 OS=Drosophila melanogaster GN=CSN3 PE=2 SV=2 - [CSN3_DROME]                                   | 0.00  | 2.02     | 1          | 1                 | 1          | 1      | 2.851E7 | 445   | 50.7     | 6.25     |
| Q9VIV3    | Cytoplasmic tRNA 2-thiolation protein 2 OS=Drosophila melanogaster GN=CG10189 PE=1 SV=1 - [CTU2_DROME]                           | 0.00  | 2.47     | 1          | 1                 | 1          | 1      | 7.773E7 | 405   | 44.7     | 6.33     |
| Q9V629    | Protein cutoff OS=Drosophila melanogaster GN=cuff PE=1 SV=1 - [CUFF_DROME]                                                       | 0.00  | 6.25     | 1          | 1                 | 1          | 2      |         | 384   | 44.8     | 7.43     |
| Q9V3B6    | Protein CWC15 homolog OS=Drosophila melanogaster GN=c12.1 PE=2 SV=1 - [CWC15_DROME]                                              | 0.00  | 2.32     | 1          | 1                 | 1          | 1      | 8.925E5 | 259   | 28.4     | 7.43     |
| Q9VF87    | Cytoplasmic FMR1-interacting protein OS=Drosophila melanogaster GN=Sra-1 PE=1 SV=1 - [CYFIP_DROME]                               | 0.00  | 0.54     | 1          | 1                 | 1          | 1      | 9.756E7 | 1291  | 149.2    | 7.12     |
| Q9VH89    | Protein dalmatian OS=Drosophila melanogaster GN=dmr PE=1 SV=1 - [DALMA_DROME]                                                    | 0.00  | 1.17     | 1          | 1                 | 1          | 1      | 3.747E7 | 857   | 96.5     | 9.39     |
| P91931    | S-adenosylmethionine decarboxylase proenzyme OS=Drosophila melanogaster GN=SamDC PE=2 SV=1 - [DCAM_DROME]                        | 0.00  | 8.36     | 1          | 1                 | 1          | 1      | 1.545E7 | 347   | 39.8     | 4.91     |
| P13496    | Dynactin subunit 1 OS=Drosophila melanogaster GN=Gl PE=1 SV=2 - [DCTN1_DROME]                                                    | 0.00  | 0.87     | 1          | 1                 | 1          | 1      | 4.664E6 | 1265  | 141.1    | 5.62     |
| P18173    | Glucose dehydrogenase [FAD, quinone] OS=Drosophila melanogaster GN=Gld PE=3 SV=3 - [DHGL_DROME]                                  | 0.00  | 3.68     | 1          | 1                 | 1          | 1      |         | 625   | 68.4     | 7.23     |
| Q8T626    | Protein disks lost OS=Drosophila melanogaster GN=dlt PE=1 SV=2 - [DLT_DROME]                                                     | 0.00  | 3.31     | 1          | 2                 | 2          | 2      |         | 1240  | 139.4    | 6.93     |
| Q9W1H4    | DNA ligase 1 OS=Drosophila melanogaster GN=DNA-lig1 PE=1 SV=2 - [DNLI1_DROME]                                                    | 0.00  | 2.54     | 1          | 1                 | 1          | 2      | 1.888E7 | 747   | 84.7     | 6.62     |
| Q9V9U4    | Deoxyhypusine hydroxylase OS=Drosophila melanogaster GN=nero PE=2 SV=1 - [DOHH_DROME]                                            | 0.00  | 6.62     | 1          | 1                 | 1          | 2      | 8.007E6 | 302   | 33.5     | 4.73     |
| P26019    | DNA polymerase alpha catalytic subunit OS=Drosophila melanogaster GN=DNApol-alpha180 PE=1 SV=2 - [DPOLA_DROME]                   | 0.00  | 1.88     | 1          | 2                 | 2          | 2      |         | 1488  | 169.8    | 8.02     |
| Q24292    | Protein dachsous OS=Drosophila melanogaster GN=ds PE=1 SV=3 - [DS_DROME]                                                         | 0.00  | 0.31     | 2          | 1                 | 1          | 1      | 7.227E7 | 3503  | 379.5    | 5.03     |
| Q9V929    | Probable rRNA-processing protein EBP2 homolog OS=Drosophila melanogaster GN=CG1542 PE=2 SV=1 - [EBP2_DROME]                      | 0.00  | 6.51     | 1          | 1                 | 1          | 1      | 5.743E6 | 307   | 35.1     | 10.10    |
| Q9VE34    | Ectopic P granules protein 5 homolog OS=Drosophila melanogaster GN=CG14299 PE=1 SV=2 - [EPGS_DROME]                              | 0.00  | 1.55     | 1          | 1                 | 1          | 1      |         | 2455  | 280.5    | 6.57     |
| Q07436    | Protein expanded OS=Drosophila melanogaster GN=ex PE=1 SV=3 - [EXPA_DROME]                                                       | 0.00  | 1.33     | 1          | 1                 | 1          | 1      |         | 1427  | 153.5    | 8.34     |
| Q8T3L6    | Probable malonyl-CoA-acyl carrier protein transacylase, mitochondrial OS=Drosophila melanogaster GN=beg PE=2 SV=2 - [FABD_DROME] | 0.00  | 5.80     | 1          | 1                 | 1          | 1      |         | 379   | 42.1     | 9.16     |
| Q960W6    | Putative fatty acyl-CoA reductase CG8306 OS=Drosophila melanogaster GN=CG8306 PE=2 SV=1 - [FACR3_DROME]                          | 0.00  | 2.71     | 1          | 1                 | 1          | 1      | 5.028E6 | 516   | 58.4     | 9.32     |



| Accession | Description                                                                                                                  | Score | Coverage | # Proteins | # Unique Peptides | # Peptides | # PSMs | Area    | # AAs | MW [kDa] | calc. pI |
|-----------|------------------------------------------------------------------------------------------------------------------------------|-------|----------|------------|-------------------|------------|--------|---------|-------|----------|----------|
| P33450    | Cadherin-related tumor suppressor OS=Drosophila melanogaster GN=ft PE=1 SV=3 - [FAT_DROME]                                   | 0.00  | 0.49     | 1          | 1                 | 1          | 1      |         | 5147  | 564.4    | 5.08     |
| Q85WV6    | Adenosine monophosphate-protein transferase FICD homolog OS=Drosophila melanogaster GN=Fic PE=1 SV=1 - [FICD_DROME]          | 0.00  | 5.28     | 1          | 1                 | 1          | 1      | 8.112E6 | 492   | 55.7     | 6.70     |
| O61491    | Flotillin-1 OS=Drosophila melanogaster GN=Flo-1 PE=2 SV=1 - [FLOT1_DROME]                                                    | 0.00  | 7.28     | 1          | 1                 | 1          | 2      | 1.895E7 | 426   | 47.1     | 5.64     |
| P40795    | Protein folded gastrulation OS=Drosophila melanogaster GN=fog PE=2 SV=1 - [FOG_DROME]                                        | 0.00  | 3.42     | 1          | 1                 | 1          | 1      |         | 730   | 78.2     | 4.49     |
| Q9W596    | Microtubule-associated protein futsch OS=Drosophila melanogaster GN=futsch PE=1 SV=4 - [FUTSC_DROME]                         | 0.00  | 0.22     | 1          | 1                 | 1          | 1      | 6.313E7 | 5495  | 591.7    | 4.97     |
| Q9W0P5    | UDP-glucose 4-epimerase OS=Drosophila melanogaster GN=Gale PE=1 SV=1 - [GALE_DROME]                                          | 0.00  | 10.29    | 1          | 2                 | 2          | 3      | 1.790E8 | 350   | 38.7     | 7.46     |
| Q6WV20    | Polypeptide N-acetylgalactosaminyltransferase 1 OS=Drosophila melanogaster GN=GaiNac-T1 PE=2 SV=2 - [GALT1_DROME]            | 0.00  | 4.99     | 1          | 1                 | 1          | 1      |         | 601   | 68.9     | 6.92     |
| Q6WV17    | Polypeptide N-acetylgalactosaminyltransferase 5 OS=Drosophila melanogaster GN=pgant5 PE=2 SV=2 - [GALT5_DROME]               | 0.00  | 4.13     | 1          | 1                 | 1          | 1      |         | 630   | 72.1     | 7.83     |
| Q8SY33    | Protein Gawkly OS=Drosophila melanogaster GN=gw PE=1 SV=1 - [GAWKY_DROME]                                                    | 0.00  | 3.54     | 1          | 2                 | 2          | 2      | 6.955E6 | 1384  | 142.9    | 6.74     |
| Q8INF0    | Soluble guanylate cyclase 88E OS=Drosophila melanogaster GN=Gyc88E PE=1 SV=3 - [GCY8E_DROME]                                 | 0.00  | 2.01     | 2          | 1                 | 1          | 1      | 1.211E7 | 947   | 105.0    | 6.79     |
| Q9VNL4    | Glutaredoxin domain-containing cysteine-rich protein CG31559 OS=Drosophila melanogaster GN=CG31559 PE=1 SV=2 - [GRCR1_DROME] | 0.00  | 4.19     | 1          | 1                 | 1          | 1      |         | 454   | 50.1     | 6.40     |
| Q9W3K5    | Glutamate-cysteine ligase OS=Drosophila melanogaster GN=Gclc PE=2 SV=1 - [GSH1_DROME]                                        | 0.00  | 3.21     | 1          | 1                 | 1          | 1      | 8.549E6 | 717   | 80.7     | 6.15     |
| Q9V3D2    | Oxygen-dependent coproporphyrinogen-III oxidase OS=Drosophila melanogaster GN=Coprox PE=1 SV=1 - [HEM6_DROME]                | 0.00  | 5.38     | 1          | 1                 | 1          | 1      |         | 390   | 44.4     | 8.72     |
| Q9V9S8    | Ferrochelatase, mitochondrial OS=Drosophila melanogaster GN=FeCh PE=2 SV=1 - [HEMH_DROME]                                    | 0.00  | 4.17     | 1          | 1                 | 1          | 1      |         | 384   | 43.6     | 8.40     |
| P55162    | Membrane-associated protein Hem OS=Drosophila melanogaster GN=Hem PE=2 SV=1 - [HEM_DROME]                                    | 0.00  | 2.22     | 1          | 2                 | 2          | 2      | 1.847E7 | 1126  | 129.3    | 6.81     |
| Q9NFT9    | Hexokinase type 1 OS=Drosophila melanogaster GN=Hex-t1 PE=2 SV=1 - [HXX1_DROME]                                              | 0.00  | 4.52     | 1          | 1                 | 1          | 1      | 3.469E5 | 465   | 52.2     | 6.39     |
| Q08180    | Irregular chiasm C-roughest protein OS=Drosophila melanogaster GN=rst PE=1 SV=2 - [ICCR_DROME]                               | 0.00  | 2.09     | 1          | 1                 | 1          | 1      |         | 764   | 83.0     | 6.99     |
| Q8MLZ7    | Chitinase-like protein Idgf3 OS=Drosophila melanogaster GN=Idgf3 PE=1 SV=3 - [IDGF3_DROME]                                   | 0.00  | 4.08     | 2          | 1                 | 1          | 1      |         | 441   | 49.2     | 7.55     |
| P09208    | Insulin-like receptor OS=Drosophila melanogaster GN=InR PE=1 SV=3 - [INSR_DROME]                                             | 0.00  | 0.65     | 1          | 1                 | 1          | 1      |         | 2144  | 239.6    | 6.90     |
| Q9VWL5    | Innexin inx5 OS=Drosophila melanogaster GN=Inx5 PE=2 SV=2 - [INX5_DROME]                                                     | 0.00  | 4.30     | 1          | 1                 | 1          | 1      |         | 419   | 48.9     | 8.65     |
| Q24368    | Chromatin-remodeling complex ATPase chain Iswi OS=Drosophila melanogaster GN=Iswi PE=1 SV=1 - [ISWI_DROME]                   | 0.00  | 0.97     | 1          | 1                 | 1          | 1      |         | 1027  | 118.8    | 8.29     |
| P29993    | Inositol 1,4,5-trisphosphate receptor OS=Drosophila melanogaster GN=Itp-r83A PE=2 SV=3 - [ITPR_DROME]                        | 0.00  | 0.35     | 1          | 1                 | 1          | 1      |         | 2838  | 318.9    | 5.83     |
| P20348    | Sex-regulated protein janus-A OS=Drosophila melanogaster GN=janA PE=2 SV=2 - [JANA_DROME]                                    | 0.00  | 7.41     | 1          | 1                 | 1          | 1      |         | 135   | 15.2     | 7.49     |
| P11346    | Raf homolog serine/threonine-protein kinase phi OS=Drosophila melanogaster GN=phi PE=1 SV=6 - [KRAF1_DROME]                  | 0.00  | 2.84     | 1          | 1                 | 1          | 1      |         | 739   | 83.7     | 8.73     |
| Q9V4Z9    | Protein lines OS=Drosophila melanogaster GN=lin PE=1 SV=1 - [LINES_DROME]                                                    | 0.00  | 0.82     | 1          | 1                 | 1          | 2      | 1.025E9 | 858   | 96.2     | 5.31     |
| P42284    | Longitudinals lacking protein, isoforms H/M/V OS=Drosophila melanogaster GN=lola PE=1 SV=2 - [LOLA2_DROME]                   | 0.00  | 2.91     | 6          | 1                 | 1          | 1      | 2.838E6 | 549   | 59.3     | 5.52     |
| P11995    | Larval serum protein 1 alpha chain OS=Drosophila melanogaster GN=Lsp1alpha PE=2 SV=3 - [LSP1A_DROME]                         | 0.00  | 1.23     | 1          | 1                 | 1          | 1      | 7.418E8 | 816   | 98.8     | 6.14     |
| Q9VZL6    | Regulator complex protein LAMTOR4 homolog OS=Drosophila melanogaster GN=CG14977 PE=1 SV=2 - [LTOR4_DROME]                    | 0.00  | 22.50    | 2          | 1                 | 1          | 1      | 4.113E7 | 120   | 13.3     | 5.03     |
| Q9VNS0    | Protein maelstrom OS=Drosophila melanogaster GN=mael PE=1 SV=1 - [MAEL_DROME]                                                | 0.00  | 2.18     | 1          | 1                 | 1          | 1      |         | 459   | 51.6     | 8.18     |
| Q7K3L1    | Guanylate kinase-associated protein mars OS=Drosophila melanogaster GN=mars PE=1 SV=1 - [MARS_DROME]                         | 0.00  | 0.87     | 1          | 1                 | 1          | 1      |         | 921   | 101.9    | 9.98     |
| Q9VX55    | Lysophospholipid acyltransferase 5 OS=Drosophila melanogaster GN=nes PE=1 SV=1 - [MBOA5_DROME]                               | 0.00  | 1.61     | 1          | 1                 | 1          | 1      |         | 497   | 57.4     | 8.19     |
| Q9VGV6    | DNA replication licensing factor Mcm5 OS=Drosophila melanogaster GN=Mcm5 PE=1 SV=1 - [MCM5_DROME]                            | 0.00  | 1.77     | 1          | 1                 | 1          | 1      |         | 733   | 82.2     | 7.84     |
| Q9V461    | DNA replication licensing factor Mcm6 OS=Drosophila melanogaster GN=Mcm6 PE=1 SV=1 - [MCM6_DROME]                            | 0.00  | 2.08     | 1          | 2                 | 2          | 3      | 4.874E7 | 817   | 92.3     | 5.38     |
| P49028    | Protein mago nashi OS=Drosophila melanogaster GN=mago PE=1 SV=1 - [MGN_DROME]                                                | 0.00  | 5.44     | 1          | 1                 | 1          | 1      | 4.321E6 | 147   | 17.3     | 6.11     |
| Q86BA1    | Protein-methionine sulfoxide oxidase Mical OS=Drosophila melanogaster GN=Mical PE=1 SV=1 - [MICAL_DROME]                     | 0.00  | 0.28     | 1          | 1                 | 1          | 1      | 7.301E6 | 4723  | 524.7    | 7.09     |
| Q9VUM0    | Probable DNA mismatch repair protein Msh6 OS=Drosophila melanogaster GN=Msh6 PE=1 SV=2 - [MSH6_DROME]                        | 0.00  | 2.27     | 1          | 1                 | 1          | 1      | 5.609E8 | 1190  | 133.1    | 7.28     |
| Q24134    | Negative elongation factor D OS=Drosophila melanogaster GN=TH1 PE=1 SV=2 - [NELFD_DROME]                                     | 0.00  | 2.60     | 1          | 1                 | 1          | 2      | 1.958E8 | 578   | 65.7     | 5.07     |
| Q9VXE6    | Nuclear pore complex protein Nup153 OS=Drosophila melanogaster GN=Nup153 PE=1 SV=4 - [NU153_DROME]                           | 0.00  | 3.93     | 2          | 3                 | 3          | 3      | 7.955E6 | 1883  | 196.5    | 8.13     |
| Q9VDV3    | Probable nucleoporin Nup58 OS=Drosophila melanogaster GN=Nup58 PE=2 SV=1 - [NUPL1_DROME]                                     | 0.00  | 2.20     | 1          | 1                 | 1          | 1      | 1.830E7 | 546   | 55.5     | 9.44     |
| Q9V931    | General odorant-binding protein 57c OS=Drosophila melanogaster GN=Obp57c PE=2 SV=1 - [OB57C_DROME]                           | 0.00  | 13.42    | 1          | 1                 | 1          | 1      |         | 149   | 17.2     | 4.31     |
| Q9W589    | GDP-fucose protein O-fucosyltransferase 2 OS=Drosophila melanogaster GN=O-fut2 PE=1 SV=1 - [OFUT2_DROME]                     | 0.00  | 4.49     | 1          | 1                 | 1          | 1      |         | 490   | 56.0     | 8.12     |
| P08255    | Opsin Rh4 OS=Drosophila melanogaster GN=Rh4 PE=1 SV=2 - [OPS4_DROME]                                                         | 0.00  | 8.99     | 1          | 1                 | 1          | 1      | 2.646E7 | 378   | 42.6     | 7.75     |
| P91679    | Peptide transporter family 1 OS=Drosophila melanogaster GN=yin PE=1 SV=2 - [PEPT1_DROME]                                     | 0.00  | 5.11     | 2          | 1                 | 1          | 1      | 9.193E6 | 743   | 82.2     | 6.30     |
| Q9VVK6    | Post-GPI attachment to proteins factor 2-like OS=Drosophila melanogaster GN=CG7990 PE=2 SV=4 - [PGP2L_DROME]                 | 0.00  | 5.54     | 1          | 1                 | 1          | 1      | 1.270E6 | 325   | 36.1     | 8.07     |
| P39769    | Polyhomeotic-proximal chromatin protein OS=Drosophila melanogaster GN=ph-p PE=1 SV=2 - [PHP_DROME]                           | 0.00  | 2.20     | 1          | 1                 | 1          | 1      |         | 1589  | 167.2    | 9.06     |
| Q9U9P7    | Cytoplasmic phosphatidylinositol transfer protein 1 OS=Drosophila melanogaster GN=rdgBbeta PE=2 SV=1 - [PITC1_DROME]         | 0.00  | 4.76     | 2          | 2                 | 2          | 2      | 1.704E7 | 273   | 31.7     | 5.45     |
| Q9W3C7    | Palmitoyl-protein thioesterase 1 OS=Drosophila melanogaster GN=Ppt1 PE=1 SV=2 - [PPT1_DROME]                                 | 0.00  | 9.24     | 1          | 1                 | 1          | 1      |         | 314   | 35.8     | 7.14     |
| Q9V9E3    | Presequence protease, mitochondrial OS=Drosophila melanogaster GN=CG3107 PE=2 SV=2 - [PREP_DROME]                            | 0.00  | 2.13     | 1          | 2                 | 2          | 2      | 8.056E7 | 1034  | 119.2    | 6.81     |
| Q9VFS8    | 26S proteasome non-ATPase regulatory subunit 9 OS=Drosophila melanogaster GN=CG9588 PE=1 SV=1 - [PSMD9_DROME]                | 0.00  | 4.55     | 1          | 1                 | 1          | 1      |         | 220   | 23.9     | 5.66     |
| A129A8    | Protein PTCD3 homolog, mitochondrial OS=Drosophila melanogaster GN=CG4679 PE=2 SV=1 - [PTCD3_DROME]                          | 0.00  | 1.23     | 1          | 1                 | 1          | 1      | 1.328E7 | 652   | 74.2     | 5.92     |

| Accession | Description                                                                                                                          | Score | Coverage | # Proteins | # Unique Peptides | # Peptides | # PSMs | Area    | # AAs | MW [kDa] | calc. pI |
|-----------|--------------------------------------------------------------------------------------------------------------------------------------|-------|----------|------------|-------------------|------------|--------|---------|-------|----------|----------|
| Q9VPK7    | Putative tRNA pseudouridine synthase Pus10 OS=Drosophila melanogaster GN=Pus10 PE=2 SV=2 - [PUS10_DROME]                             | 0.00  | 2.80     | 1          | 1                 | 1          | 3      | 5.300E6 | 500   | 56.7     | 8.35     |
| Q24472    | Retinoblastoma family protein OS=Drosophila melanogaster GN=Rbf PE=1 SV=2 - [RBF_DROME]                                              | 0.00  | 2.60     | 1          | 2                 | 2          | 2      | 1.558E7 | 845   | 96.8     | 6.57     |
| Q9VYS3    | Regulator of nonsense transcripts 1 homolog OS=Drosophila melanogaster GN=Upf1 PE=1 SV=2 - [RENT1_DROME]                             | 0.00  | 2.12     | 1          | 1                 | 1          | 1      | 1180    | 129.8 | 7.33     |          |
| P35600    | Replication factor C subunit 1 OS=Drosophila melanogaster GN=Gnf1 PE=1 SV=2 - [RFC1_DROME]                                           | 0.00  | 2.54     | 1          | 2                 | 2          | 2      | 3.588E6 | 986   | 108.5    | 9.31     |
| Q86BY9    | Protein rigor mortis OS=Drosophila melanogaster GN=rig PE=1 SV=1 - [RIG_DROME]                                                       | 0.00  | 1.05     | 1          | 1                 | 1          | 1      | 2.534E7 | 1235  | 137.7    | 6.77     |
| O16130    | 60S ribosomal protein L39 OS=Drosophila melanogaster GN=Rpl39 PE=1 SV=2 - [RL39_DROME]                                               | 0.00  | 13.73    | 1          | 1                 | 1          | 1      | 1.017E9 | 51    | 6.3      | 12.56    |
| Q9VMX0    | 39S ribosomal protein L28, mitochondrial OS=Drosophila melanogaster GN=mRpl28 PE=2 SV=1 - [RM28_DROME]                               | 0.00  | 1.99     | 1          | 1                 | 1          | 1      | 5.527E7 | 302   | 34.9     | 8.95     |
| Q9VC49    | DNA-directed RNA polymerases I, II, and III subunit RPABC5 OS=Drosophila melanogaster GN=Rpb10 PE=1 SV=1 - [RPAB5_DROME]             | 0.00  | 8.96     | 1          | 1                 | 1          | 1      | 67      | 7.7   | 7.77     |          |
| P04052    | DNA-directed RNA polymerase II subunit RPB1 OS=Drosophila melanogaster GN=RpII215 PE=3 SV=4 - [RPB1_DROME]                           | 0.00  | 0.69     | 1          | 1                 | 1          | 1      | 1.453E7 | 1887  | 209.0    | 7.81     |
| Q9V4Q8    | Probable U2 small nuclear ribonucleoprotein A' OS=Drosophila melanogaster GN=U2A PE=1 SV=1 - [RU2A_DROME]                            | 0.00  | 6.42     | 1          | 1                 | 1          | 1      | 265     | 29.7  | 8.51     |          |
| Q9VXE0    | Probable small nuclear ribonucleoprotein G OS=Drosophila melanogaster GN=SmG PE=1 SV=1 - [RUXG_DROME]                                | 0.00  | 11.84    | 1          | 1                 | 1          | 1      | 2.017E8 | 76    | 8.5      | 8.79     |
| Q9VWF2    | Supporter of activation of yellow protein OS=Drosophila melanogaster GN=e(y)3 PE=2 SV=3 - [SAYP_DROME]                               | 0.00  | 2.39     | 3          | 1                 | 1          | 1      | 2.335E7 | 2006  | 212.6    | 7.52     |
| Q9W0Y8    | Sodium channel protein 60E OS=Drosophila melanogaster GN=NaCP60E PE=2 SV=5 - [SCN60_DROME]                                           | 0.00  | 0.32     | 1          | 1                 | 1          | 1      | 2821    | 318.4 | 6.93     |          |
| Q94523    | Succinate dehydrogenase [ubiquinone] flavoprotein subunit, mitochondrial OS=Drosophila melanogaster GN=SdhA PE=2 SV=3 - [SDHA_DROME] | 0.00  | 5.45     | 1          | 2                 | 2          | 2      | 3.013E7 | 661   | 72.3     | 7.12     |
| P54359    | Septin-2 OS=Drosophila melanogaster GN=Sep2 PE=2 SV=2 - [SEPT2_DROME]                                                                | 0.00  | 2.15     | 2          | 1                 | 1          | 1      | 1.681E7 | 419   | 48.4     | 7.61     |
| Q9VH14    | Probable splicing factor 3B subunit 5 OS=Drosophila melanogaster GN=CG11985 PE=1 SV=1 - [SF3B5_DROME]                                | 0.00  | 23.53    | 1          | 1                 | 1          | 1      | 1.763E7 | 85    | 10.0     | 6.35     |
| Q9VAQ7    | Pre-mRNA-splicing factor Slu7 OS=Drosophila melanogaster GN=Slu7 PE=1 SV=2 - [SLU7_DROME]                                            | 0.00  | 2.44     | 1          | 1                 | 1          | 1      | 4.006E7 | 574   | 65.9     | 7.06     |
| Q9VS48    | Structure-specific endonuclease subunit SLX4 OS=Drosophila melanogaster GN=mus312 PE=1 SV=2 - [SLX4_DROME]                           | 0.00  | 2.18     | 2          | 1                 | 1          | 1      | 3.812E6 | 1145  | 128.1    | 5.45     |
| Q70PP2    | Serine/threonine-protein kinase Smg1 OS=Drosophila melanogaster GN=nonC PE=1 SV=2 - [SMG1_DROME]                                     | 0.00  | 0.68     | 1          | 1                 | 1          | 1      | 3218    | 361.4 | 6.86     |          |
| Q23972    | Protein Smaug OS=Drosophila melanogaster GN=smg PE=1 SV=2 - [SMG_DROME]                                                              | 0.00  | 1.20     | 1          | 1                 | 1          | 1      | 999     | 109.0 | 7.43     |          |
| Q23983    | Soluble NSF attachment protein OS=Drosophila melanogaster GN=Snap PE=1 SV=1 - [SNAP_DROME]                                           | 0.00  | 4.45     | 1          | 1                 | 1          | 1      | 3.058E7 | 292   | 33.0     | 5.45     |
| Q9V9J3    | Tyrosine-protein kinase Src42A OS=Drosophila melanogaster GN=Src42A PE=2 SV=1 - [SRC42_DROME]                                        | 0.00  | 2.13     | 1          | 1                 | 1          | 1      | 517     | 59.0  | 6.68     |          |
| Q05344    | FACT complex subunit Ssrp1 OS=Drosophila melanogaster GN=Ssrp PE=1 SV=2 - [SSRP1_DROME]                                              | 0.00  | 1.66     | 1          | 1                 | 1          | 1      | 723     | 81.5  | 5.63     |          |
| Q9V877    | Kinesin-like protein subito OS=Drosophila melanogaster GN=sub PE=1 SV=1 - [SUB_DROME]                                                | 0.00  | 2.39     | 1          | 1                 | 1          | 1      | 5.831E6 | 628   | 71.3     | 5.48     |
| P25172    | Protein suppressor 2 of zeste OS=Drosophila melanogaster GN=Su(z)2 PE=2 SV=2 - [SUZ2_DROME]                                          | 0.00  | 0.88     | 1          | 1                 | 1          | 1      | 1368    | 146.3 | 9.33     |          |
| Q9VFL5    | Methionine--tRNA ligase, mitochondrial OS=Drosophila melanogaster GN=Aats-met PE=2 SV=2 - [SYMM_DROME]                               | 0.00  | 3.26     | 1          | 1                 | 1          | 1      | 582     | 66.0  | 8.00     |          |
| Q24325    | Transcription initiation factor TFIID subunit 2 OS=Drosophila melanogaster GN=Taf2 PE=1 SV=2 - [TAF2_DROME]                          | 0.00  | 1.15     | 1          | 1                 | 1          | 1      | 2.875E7 | 1221  | 139.4    | 7.23     |
| Q9VWB0    | Tectonin beta-propeller repeat-containing protein OS=Drosophila melanogaster GN=Pex23 PE=2 SV=2 - [TECPR_DROME]                      | 0.00  | 1.26     | 1          | 1                 | 1          | 1      | 1350    | 149.4 | 6.99     |          |
| Q9VMH0    | Tectonic OS=Drosophila melanogaster GN=tectonic PE=1 SV=4 - [TECT_DROME]                                                             | 0.00  | 6.39     | 1          | 1                 | 1          | 1      | 657     | 73.9  | 6.27     |          |
| Q9V3N8    | Probable tRNA(His) guanylyltransferase OS=Drosophila melanogaster GN=l(2)35Bc PE=2 SV=1 - [THG1_DROME]                               | 0.00  | 6.99     | 1          | 1                 | 1          | 1      | 6.319E7 | 286   | 33.1     | 7.47     |
| P49021    | Protein timeless OS=Drosophila melanogaster GN=tim PE=1 SV=3 - [TIM_DROME]                                                           | 0.00  | 2.72     | 1          | 2                 | 2          | 2      | 1398    | 156.3 | 5.25     |          |
| P30974    | Tachykinin-like peptide receptor 86C OS=Drosophila melanogaster GN=TKR86C PE=2 SV=2 - [TLR1_DROME]                                   | 0.00  | 6.55     | 2          | 1                 | 1          | 1      | 504     | 58.0  | 9.16     |          |
| Q9VQE9    | Transmembrane and TPR repeat-containing protein CG31690 OS=Drosophila melanogaster GN=CG31690 PE=2 SV=3 - [TMTC1_DROME]              | 0.00  | 2.56     | 1          | 1                 | 1          | 1      | 2.622E7 | 859   | 94.8     | 9.03     |
| Q81N41    | Protein Turandot X OS=Drosophila melanogaster GN=TotX PE=2 SV=1 - [TOTX_DROME]                                                       | 0.00  | 19.01    | 1          | 1                 | 1          | 1      | 142     | 16.4  | 7.55     |          |
| Q9VP47    | Pre-rRNA-processing protein TSR1 homolog OS=Drosophila melanogaster GN=CG7338 PE=1 SV=1 - [TSR1_DROME]                               | 0.00  | 2.21     | 1          | 1                 | 1          | 1      | 814     | 93.7  | 6.87     |          |
| P34739    | Transcription termination factor 2 OS=Drosophila melanogaster GN=lds PE=1 SV=2 - [TTF2_DROME]                                        | 0.00  | 0.94     | 1          | 1                 | 1          | 1      | 1061    | 118.3 | 6.65     |          |
| Q9VUV9    | Putative U5 small nuclear ribonucleoprotein 200 kDa helicase OS=Drosophila melanogaster GN=l(3)72Ab PE=2 SV=4 - [U520_DROME]         | 0.00  | 1.77     | 1          | 4                 | 4          | 4      | 3.270E7 | 2142  | 244.4    | 6.04     |
| Q9VNI3    | UPF0609 protein CG1218 OS=Drosophila melanogaster GN=CG1218 PE=1 SV=2 - [U609_DROME]                                                 | 0.00  | 4.45     | 1          | 1                 | 1          | 1      | 1.929E6 | 449   | 51.1     | 7.03     |
| Q9VSF3    | Nedd8-conjugating enzyme Ubc12 OS=Drosophila melanogaster GN=Ubc12 PE=1 SV=1 - [UBC12_DROME]                                         | 0.00  | 13.81    | 1          | 1                 | 1          | 1      | 1.104E7 | 181   | 20.7     | 7.15     |
| Q9VRP5    | Ubiquitin carboxyl-terminal hydrolase 36 OS=Drosophila melanogaster GN=scny PE=1 SV=3 - [UBP36_DROME]                                | 0.00  | 3.08     | 1          | 2                 | 2          | 2      | 1038    | 114.0 | 9.09     |          |
| Q9VUR0    | Probable Ufm1-specific protease 2 OS=Drosophila melanogaster GN=UFSP2 PE=2 SV=1 - [UFSP2_DROME]                                      | 0.00  | 1.81     | 1          | 1                 | 1          | 1      | 7.009E6 | 607   | 68.2     | 6.76     |
| Q9VB11    | Protein unc-80 homolog OS=Drosophila melanogaster GN=CG18437 PE=3 SV=4 - [UNC80_DROME]                                               | 0.00  | 0.46     | 1          | 1                 | 1          | 1      | 3295    | 366.6 | 8.12     |          |
| Q9W552    | Vacuolar protein sorting-associated protein 26 OS=Drosophila melanogaster GN=Vps26 PE=2 SV=1 - [VPS26_DROME]                         | 0.00  | 3.56     | 1          | 1                 | 1          | 1      | 3.405E7 | 478   | 52.6     | 6.39     |
| Q8MSY4    | Vacuolar protein sorting-associated protein 51 homolog OS=Drosophila melanogaster GN=CG15087 PE=2 SV=1 - [VPS51_DROME]               | 0.00  | 2.70     | 1          | 1                 | 1          | 1      | 6.931E6 | 740   | 83.9     | 5.40     |
| Q06521    | Vitellogenin membrane protein Vm34Ca OS=Drosophila melanogaster GN=Vm34Ca PE=1 SV=2 - [VTU3_DROME]                                   | 0.00  | 35.29    | 1          | 1                 | 1          | 2      | 3.575E7 | 119   | 11.9     | 8.05     |
| O44342    | Protein windbeutel OS=Drosophila melanogaster GN=wbl PE=1 SV=1 - [WBL_DROME]                                                         | 0.00  | 2.72     | 1          | 1                 | 1          | 1      | 257     | 29.4  | 6.44     |          |
| Q7K0L4    | WD repeat-containing protein 26 homolog OS=Drosophila melanogaster GN=CG7611 PE=1 SV=1 - [WDR26_DROME]                               | 0.00  | 5.08     | 1          | 2                 | 2          | 4      | 3.761E6 | 630   | 69.6     | 5.63     |
| Q8T088    | WD repeat-containing protein 55 homolog OS=Drosophila melanogaster GN=CG14722 PE=2 SV=1 - [WDR55_DROME]                              | 0.00  | 2.41     | 1          | 1                 | 1          | 1      | 1.415E7 | 498   | 55.3     | 4.53     |
| Q9VJN5    | Zinc finger protein weckle OS=Drosophila melanogaster GN=wek PE=1 SV=1 - [WEK_DROME]                                                 | 0.00  | 5.96     | 1          | 1                 | 1          | 1      | 1.136E6 | 470   | 53.2     | 7.05     |
| Q3LHL9    | Protein winged eye OS=Drosophila melanogaster GN=wge PE=1 SV=1 - [WGE_DROME]                                                         | 0.00  | 0.72     | 1          | 1                 | 1          | 1      | 1658    | 178.2 | 6.99     |          |

| Accession | Description                                                                                                                 | Score | Coverage | # Proteins | # Unique Peptides | # Peptides | # PSMs | Area    | # AAs | MW [kDa] | calc. pI |
|-----------|-----------------------------------------------------------------------------------------------------------------------------|-------|----------|------------|-------------------|------------|--------|---------|-------|----------|----------|
| P82804    | Partner of Y14 and mago OS=Drosophila melanogaster GN=wibg PE=1 SV=1 - [WIBG_DROME]                                         | 0.00  | 8.70     | 1          | 1                 | 1          | 1      |         | 207   | 23.4     | 9.83     |
| Q8SX68    | Uncharacterized protein CG10915 OS=Drosophila melanogaster GN=CG10915 PE=1 SV=1 - [Y0915_DROME]                             | 0.00  | 1.48     | 1          | 1                 | 1          | 1      | 1.174E7 | 609   | 65.4     | 7.06     |
| Q6NLL1    | WD repeat-containing protein CG11141 OS=Drosophila melanogaster GN=CG11141 PE=1 SV=1 - [Y1411_DROME]                        | 0.00  | 1.69     | 1          | 1                 | 1          | 1      | 7.206E7 | 710   | 79.0     | 5.91     |
| Q7YZA2    | Uncharacterized protein CG7065 OS=Drosophila melanogaster GN=CG7065 PE=1 SV=1 - [Y7065_DROME]                               | 0.00  | 1.87     | 1          | 1                 | 1          | 1      |         | 1231  | 136.7    | 9.23     |
| Q9VA00    | Protein zwilch OS=Drosophila melanogaster GN=zwilch PE=1 SV=1 - [ZWILC_DROME]                                               | 0.00  | 4.21     | 1          | 1                 | 1          | 1      |         | 641   | 72.4     | 6.65     |
| Q9VLW9    | Homocysteine-induced endoplasmic reticulum protein, isoform A OS=Drosophila melanogaster GN=Herp PE=2 SV=1 - [Q9VLW9_DROME] | 0.00  | 1.29     | 2          | 1                 | 1          | 1      | 5.479E7 | 465   | 50.0     | 6.60     |
| Q9VE12    | CG6005 OS=Drosophila melanogaster GN=CG6005 PE=2 SV=2 - [Q9VE12_DROME]                                                      | 0.00  | 6.48     | 1          | 1                 | 1          | 1      |         | 324   | 36.7     | 8.51     |
| Q9XYZ2    | Excision repair protein ERCC2/XPD OS=Drosophila melanogaster GN=Xpd PE=2 SV=1 - [Q9XYZ2_DROME]                              | 0.00  | 2.15     | 2          | 1                 | 1          | 1      |         | 745   | 85.0     | 6.93     |
| Q9VB90    | CG6283 OS=Drosophila melanogaster GN=CG6283 PE=2 SV=1 - [Q9VB90_DROME]                                                      | 0.00  | 7.67     | 1          | 1                 | 1          | 1      | 5.223E5 | 339   | 36.8     | 6.15     |
| Q81PX7    | CG1938-PA OS=Drosophila melanogaster GN=Rrp40 PE=2 SV=1 - [Q81PX7_DROME]                                                    | 0.00  | 3.88     | 1          | 1                 | 1          | 1      | 1.556E7 | 232   | 25.0     | 8.31     |
| Q9VG11    | CG14383 OS=Drosophila melanogaster GN=CG14383 PE=2 SV=1 - [Q9VG11_DROME]                                                    | 0.00  | 3.01     | 1          | 1                 | 1          | 1      | 1.036E9 | 332   | 38.7     | 8.51     |
| Q9W3W1    | Coronin OS=Drosophila melanogaster GN=pod1 PE=2 SV=1 - [Q9W3W1_DROME]                                                       | 0.00  | 2.89     | 3          | 1                 | 1          | 1      |         | 1074  | 119.3    | 6.77     |
| A1ZBL2    | CG7744 OS=Drosophila melanogaster GN=CG7744-RA PE=2 SV=1 - [A1ZBL2_DROME]                                                   | 0.00  | 4.12     | 1          | 1                 | 1          | 1      |         | 680   | 76.6     | 8.95     |
| Q9VT31    | CG16719-PA OS=Drosophila melanogaster GN=CG16719 PE=2 SV=1 - [Q9VT31_DROME]                                                 | 0.00  | 8.86     | 1          | 1                 | 1          | 1      | 2.381E6 | 271   | 30.6     | 9.41     |
| Q9VBV8    | CG11851 OS=Drosophila melanogaster GN=CG11851 PE=2 SV=1 - [Q9VBV8_DROME]                                                    | 0.00  | 1.61     | 1          | 1                 | 1          | 1      | 5.511E7 | 623   | 72.0     | 9.25     |
| Q9VG04    | CG8031 OS=Drosophila melanogaster GN=CG8031 PE=2 SV=1 - [Q9VG04_DROME]                                                      | 0.00  | 3.73     | 1          | 1                 | 1          | 1      | 6.144E7 | 295   | 33.2     | 6.93     |
| Q8SYF5    | CG32373, isoform A OS=Drosophila melanogaster GN=CG32373 PE=2 SV=1 - [Q8SYF5_DROME]                                         | 0.00  | 3.29     | 1          | 1                 | 1          | 1      | 4.211E6 | 486   | 54.0     | 6.05     |
| Q0E8N9    | CG9339-PD, isoform D OS=Drosophila melanogaster GN=sky PE=4 SV=1 - [Q0E8N9_DROME]                                           | 0.00  | 1.06     | 7          | 1                 | 1          | 1      | 4.968E7 | 568   | 65.0     | 7.64     |
| Q9VIP3    | CG10747, isoform B OS=Drosophila melanogaster GN=CG10747 PE=2 SV=2 - [Q9VIP3_DROME]                                         | 0.00  | 4.88     | 1          | 1                 | 1          | 1      | 1.101E8 | 328   | 38.3     | 7.03     |
| Q9VPM7    | CG17078, isoform B OS=Drosophila melanogaster GN=CG17078-RA PE=2 SV=2 - [Q9VPM7_DROME]                                      | 0.00  | 3.77     | 1          | 1                 | 1          | 2      | 7.660E6 | 610   | 67.5     | 7.49     |
| Q9VU75    | CG14109, isoform A OS=Drosophila melanogaster GN=CG14109 PE=2 SV=1 - [Q9VU75_DROME]                                         | 0.00  | 4.12     | 1          | 1                 | 1          | 1      |         | 243   | 27.2     | 4.78     |
| Q9VJ21    | CG9302 OS=Drosophila melanogaster GN=CG9302-RA PE=2 SV=1 - [Q9VJ21_DROME]                                                   | 0.00  | 2.35     | 1          | 1                 | 1          | 1      | 6.712E6 | 510   | 57.9     | 8.78     |
| Q9VUU7    | CG18081, isoform B OS=Drosophila melanogaster GN=CG18081 PE=2 SV=1 - [Q9VUU7_DROME]                                         | 0.00  | 9.09     | 2          | 1                 | 1          | 1      |         | 77    | 8.8      | 9.64     |
| Q8IQ27    | Ubiquitin carboxyl-terminal hydrolase OS=Drosophila melanogaster GN=CG14619-RC PE=2 SV=1 - [Q8IQ27_DROME]                   | 0.00  | 4.58     | 2          | 1                 | 1          | 1      |         | 938   | 101.6    | 9.45     |
| Q9VVH9    | GH24467p OS=Drosophila melanogaster GN=Oatp74D PE=2 SV=2 - [Q9VVH9_DROME]                                                   | 0.00  | 4.15     | 1          | 1                 | 1          | 1      |         | 819   | 88.4     | 7.27     |
| Q9VG81    | CG5167 OS=Drosophila melanogaster GN=CG5167 PE=2 SV=1 - [Q9VG81_DROME]                                                      | 0.00  | 4.64     | 1          | 1                 | 1          | 1      |         | 431   | 47.2     | 9.44     |
| Q9VCR2    | Aminoacylase-1 OS=Drosophila melanogaster GN=CG6726 PE=3 SV=2 - [Q9VCR2_DROME]                                              | 0.00  | 2.24     | 1          | 1                 | 1          | 1      |         | 401   | 45.0     | 5.62     |
| O77424    | CG32812, isoform B OS=Drosophila melanogaster GN=EG.114D9.1 PE=2 SV=1 - [O77424_DROME]                                      | 0.00  | 13.33    | 1          | 1                 | 1          | 1      |         | 225   | 25.8     | 6.79     |
| Q9W2U5    | AT19485p OS=Drosophila melanogaster GN=CG2887 PE=2 SV=1 - [Q9W2U5_DROME]                                                    | 0.00  | 7.89     | 1          | 1                 | 1          | 1      |         | 342   | 37.4     | 9.06     |
| Q9VDD5    | CG10824 OS=Drosophila melanogaster GN=CG10824 PE=1 SV=2 - [Q9VDD5_DROME]                                                    | 0.00  | 1.99     | 1          | 1                 | 1          | 1      | 7.003E7 | 554   | 62.1     | 4.98     |
| Q9W5Y4    | CG17018, isoform A OS=Drosophila melanogaster GN=CG17018-RC PE=2 SV=2 - [Q9W5Y4_DROME]                                      | 0.00  | 1.26     | 3          | 1                 | 1          | 1      | 8.435E6 | 1272  | 143.5    | 8.28     |
| Q9VQ94    | LP05220p OS=Drosophila melanogaster GN=Sec24CD PE=2 SV=2 - [Q9VQ94_DROME]                                                   | 0.00  | 0.92     | 2          | 1                 | 1          | 1      | 1.761E6 | 1193  | 129.2    | 7.25     |
| Q9W074    | FI04779p OS=Drosophila melanogaster GN=HBS1 PE=2 SV=2 - [Q9W074_DROME]                                                      | 0.00  | 1.49     | 1          | 1                 | 1          | 1      |         | 670   | 74.1     | 6.70     |
| Q9VA95    | Bet5 OS=Drosophila melanogaster GN=Bet5 PE=2 SV=1 - [Q9VA95_DROME]                                                          | 0.00  | 15.86    | 1          | 1                 | 1          | 1      | 1.046E8 | 145   | 17.0     | 9.07     |
| Q9VA51    | CG2267 OS=Drosophila melanogaster GN=CG2267 PE=2 SV=2 - [Q9VA51_DROME]                                                      | 0.00  | 7.95     | 1          | 1                 | 1          | 2      | 6.366E5 | 390   | 44.1     | 9.50     |
| Q7KNM2    | CG3018-PA, isoform A OS=Drosophila melanogaster GN=lwr PE=1 SV=1 - [Q7KNM2_DROME]                                           | 0.00  | 14.47    | 1          | 2                 | 2          | 3      | 2.057E7 | 159   | 18.1     | 8.41     |
| Q8SX92    | CG8001, isoform B OS=Drosophila melanogaster GN=CG8001 PE=2 SV=1 - [Q8SX92_DROME]                                           | 0.00  | 0.94     | 2          | 1                 | 1          | 1      | 8.059E7 | 743   | 82.7     | 5.03     |
| Q7KUZ1    | FI18406p1 OS=Drosophila melanogaster GN=Stim PE=2 SV=2 - [Q7KUZ1_DROME]                                                     | 0.00  | 1.78     | 2          | 1                 | 1          | 1      | 1.595E7 | 561   | 63.7     | 6.49     |
| Q9VGD2    | Dpr17, isoform B OS=Drosophila melanogaster GN=dpr17 PE=4 SV=2 - [Q9VGD2_DROME]                                             | 0.00  | 7.09     | 2          | 1                 | 1          | 1      | 7.240E6 | 508   | 54.0     | 6.13     |
| Q7K2W2    | CG11060 OS=Drosophila melanogaster GN=CG11060 PE=2 SV=1 - [Q7K2W2_DROME]                                                    | 0.00  | 2.97     | 1          | 1                 | 1          | 1      | 3.179E6 | 706   | 81.9     | 6.60     |
| Q9W409    | CG12219 OS=Drosophila melanogaster GN=CG12219 PE=2 SV=1 - [Q9W409_DROME]                                                    | 0.00  | 4.45     | 1          | 1                 | 1          | 1      |         | 562   | 60.6     | 7.56     |
| Q7KTU3    | CG7369 OS=Drosophila melanogaster GN=CG7369-RA PE=2 SV=1 - [Q7KTU3_DROME]                                                   | 0.00  | 5.00     | 1          | 1                 | 1          | 1      |         | 680   | 75.7     | 7.65     |
| E1JIY8    | CG42498 OS=Drosophila melanogaster GN=CG42498-RA PE=2 SV=1 - [E1JIY8_DROME]                                                 | 0.00  | 6.31     | 1          | 1                 | 1          | 1      | 1.452E7 | 111   | 12.5     | 5.92     |
| Q9VFK2    | Crossveinless c, isoform A OS=Drosophila melanogaster GN=cv-c PE=2 SV=2 - [Q9VFK2_DROME]                                    | 0.00  | 1.47     | 2          | 1                 | 1          | 1      |         | 1017  | 115.1    | 9.41     |
| Q9VHT5    | LD31571p OS=Drosophila melanogaster GN=mRpl1 PE=2 SV=2 - [Q9VHT5_DROME]                                                     | 0.00  | 3.95     | 1          | 1                 | 1          | 2      | 6.954E6 | 354   | 40.3     | 9.42     |
| Q0E965    | SRPK, isoform A OS=Drosophila melanogaster GN=SRPK PE=3 SV=1 - [Q0E965_DROME]                                               | 0.00  | 3.93     | 1          | 1                 | 1          | 1      | 7.854E6 | 764   | 85.1     | 8.98     |
| Q9VTU7    | GH14208p OS=Drosophila melanogaster GN=Rh7 PE=2 SV=2 - [Q9VTU7_DROME]                                                       | 0.00  | 4.14     | 1          | 1                 | 1          | 1      | 4.082E7 | 483   | 53.7     | 8.19     |
| Q0IGY0    | CG34411, isoform B OS=Drosophila melanogaster GN=CG4187 PE=2 SV=1 - [Q0IGY0_DROME]                                          | 0.00  | 1.99     | 2          | 1                 | 1          | 1      |         | 806   | 90.4     | 6.55     |
| Q9V428    | Icarus, isoform A OS=Drosophila melanogaster GN=ics PE=2 SV=2 - [Q9V428_DROME]                                              | 0.00  | 2.12     | 2          | 1                 | 1          | 1      |         | 283   | 31.8     | 7.55     |
| Q9VQT8    | CG16712, isoform B OS=Drosophila melanogaster GN=CG16712 PE=2 SV=1 - [Q9VQT8_DROME]                                         | 0.00  | 14.63    | 1          | 1                 | 1          | 1      | 1.924E7 | 82    | 8.7      | 5.92     |

| Accession | Description                                                                                                                                    | Score | Coverage | # Proteins | # Unique Peptides | # Peptides | # PSMs | Area    | # AAs | MW [kDa] | calc. pI |
|-----------|------------------------------------------------------------------------------------------------------------------------------------------------|-------|----------|------------|-------------------|------------|--------|---------|-------|----------|----------|
| A4V1K1    | AT21853p1 OS=Drosophila melanogaster GN=CG8398-RA PE=2 SV=1 - [A4V1K1_DROME]                                                                   | 0.00  | 8.51     | 2          | 1                 | 1          | 1      |         | 435   | 49.3     | 7.33     |
| Q9VRG3    | CG1494, isoform B OS=Drosophila melanogaster GN=CG1494 PE=4 SV=3 - [Q9VRG3_DROME]                                                              | 0.00  | 1.89     | 1          | 1                 | 1          | 1      | 2.893E6 | 1695  | 194.1    | 7.17     |
| Q9W047    | CG5704, isoform A OS=Drosophila melanogaster GN=BEST:LD30049 PE=2 SV=1 - [Q9W047_DROME]                                                        | 0.00  | 2.99     | 1          | 1                 | 1          | 1      | 3.634E7 | 335   | 38.4     | 9.00     |
| Q7JW61    | Ubiquitin carboxyl-terminal hydrolase OS=Drosophila melanogaster GN=CG8494 PE=2 SV=1 - [Q7JW61_DROME]                                          | 0.00  | 2.05     | 1          | 1                 | 1          | 2      | 2.610E7 | 975   | 109.6    | 5.62     |
| Q961H1    | Katanin p60 ATPase-containing subunit A1 OS=Drosophila melanogaster GN=kat-60L1 PE=2 SV=1 - [Q961H1_DROME]                                     | 0.00  | 4.79     | 2          | 1                 | 1          | 1      | 1.914E6 | 605   | 66.6     | 9.55     |
| E1JIB5    | CG42494, isoform A OS=Drosophila melanogaster GN=CG42494 PE=4 SV=1 - [E1JIB5_DROME]                                                            | 0.00  | 14.13    | 1          | 1                 | 1          | 1      |         | 283   | 30.9     | 4.61     |
| Q59E33    | LD21442p OS=Drosophila melanogaster GN=scaf6 PE=2 SV=1 - [Q59E33_DROME]                                                                        | 0.00  | 1.35     | 1          | 1                 | 1          | 1      |         | 960   | 107.5    | 9.22     |
| Q9GNC8    | PASILLA splice variant 1 OS=Drosophila melanogaster GN=ps PE=2 SV=1 - [Q9GNC8_DROME]                                                           | 0.00  | 2.95     | 7          | 1                 | 1          | 1      | 4.508E6 | 475   | 49.3     | 6.79     |
| Q9VUL8    | LD41491p OS=Drosophila melanogaster GN=Pex3 PE=2 SV=1 - [Q9VUL8_DROME]                                                                         | 0.00  | 3.38     | 1          | 1                 | 1          | 1      |         | 385   | 43.7     | 8.50     |
| Q9VBA3    | AT30002p OS=Drosophila melanogaster GN=sda PE=2 SV=2 - [Q9VBA3_DROME]                                                                          | 0.00  | 0.84     | 2          | 1                 | 1          | 1      | 1.881E7 | 1071  | 121.6    | 6.10     |
| Q9I7V0    | CG33988 OS=Drosophila melanogaster GN=Mid1 PE=2 SV=3 - [Q9I7V0_DROME]                                                                          | 0.00  | 1.45     | 1          | 1                 | 1          | 1      | 3.269E8 | 1241  | 135.4    | 5.95     |
| Q9VMQ8    | CG7371 OS=Drosophila melanogaster GN=CG7371-RA PE=2 SV=1 - [Q9VMQ8_DROME]                                                                      | 0.00  | 4.23     | 1          | 1                 | 1          | 1      | 6.234E5 | 662   | 77.4     | 6.62     |
| O61444    | MAP kinase kinase 4, isoform A OS=Drosophila melanogaster GN=Mkk4 PE=2 SV=1 - [O61444_DROME]                                                   | 0.00  | 6.84     | 1          | 1                 | 1          | 1      | 6.778E6 | 424   | 47.5     | 7.43     |
| Q8SXU3    | CG8207 OS=Drosophila melanogaster GN=CG8207 PE=2 SV=1 - [Q8SXU3_DROME]                                                                         | 0.00  | 2.51     | 1          | 1                 | 1          | 1      |         | 438   | 48.1     | 7.72     |
| Q9W1H6    | CG5597 OS=Drosophila melanogaster GN=CG5597 PE=1 SV=1 - [Q9W1H6_DROME]                                                                         | 0.00  | 2.69     | 1          | 1                 | 1          | 2      | 7.225E6 | 260   | 29.6     | 4.65     |
| C1C560    | MIP02960p OS=Drosophila melanogaster GN=RhoGAP1A PE=2 SV=1 - [C1C560_DROME]                                                                    | 0.00  | 1.44     | 4          | 1                 | 1          | 1      | 1.012E8 | 903   | 100.0    | 8.41     |
| Q9VF82    | CG6196 OS=Drosophila melanogaster GN=Trs33 PE=2 SV=1 - [Q9VF82_DROME]                                                                          | 0.00  | 7.89     | 1          | 1                 | 1          | 1      | 9.969E6 | 152   | 17.6     | 6.99     |
| Q7KNR7    | Photoreceptor dehydrogenase, isoform C OS=Drosophila melanogaster GN=Pdh PE=2 SV=1 - [Q7KNR7_DROME]                                            | 0.00  | 11.11    | 4          | 2                 | 2          | 3      | 7.087E6 | 261   | 28.3     | 8.69     |
| Q9VP79    | FI21431p1 OS=Drosophila melanogaster GN=ko PE=2 SV=1 - [Q9VP79_DROME]                                                                          | 0.00  | 1.14     | 1          | 1                 | 1          | 1      | 2.663E7 | 1049  | 113.5    | 8.57     |
| Q2PDM3    | CG33978, isoform C OS=Drosophila melanogaster GN=CG33978 PE=4 SV=3 - [Q2PDM3_DROME]                                                            | 0.00  | 0.66     | 1          | 1                 | 1          | 2      | 7.030E7 | 2289  | 256.4    | 6.60     |
| Q9W3D2    | Calmodulin-binding protein related to a Rab3 GDP/GTP exchange protein, isoform B OS=Drosophila melanogaster GN=Crag PE=2 SV=3 - [Q9W3D2_DROME] | 0.00  | 1.64     | 2          | 1                 | 1          | 2      |         | 1644  | 183.9    | 6.32     |
| Q9W351    | CG16892, isoform A OS=Drosophila melanogaster GN=CG16892-RA PE=2 SV=1 - [Q9W351_DROME]                                                         | 0.00  | 5.79     | 1          | 2                 | 2          | 2      |         | 466   | 52.2     | 6.71     |
| Q9W363    | Multi sex combs, isoform A OS=Drosophila melanogaster GN=mxs PE=4 SV=2 - [Q9W363_DROME]                                                        | 0.00  | 0.87     | 1          | 1                 | 1          | 1      |         | 1837  | 197.4    | 6.46     |
| Q5U0X8    | CG12325 OS=Drosophila melanogaster GN=CG12325 PE=2 SV=1 - [Q5U0X8_DROME]                                                                       | 0.00  | 1.69     | 1          | 1                 | 1          | 1      |         | 949   | 105.9    | 5.34     |
| A1ZAW0    | Dicer-2 OS=Drosophila melanogaster GN=Dcr-2 PE=1 SV=1 - [A1ZAW0_DROME]                                                                         | 0.00  | 0.70     | 1          | 1                 | 1          | 1      |         | 1722  | 197.6    | 6.86     |
| Q9VRG8    | CG1486, isoform A OS=Drosophila melanogaster GN=CG1486 PE=2 SV=1 - [Q9VRG8_DROME]                                                              | 0.00  | 2.35     | 1          | 1                 | 1          | 1      |         | 852   | 91.5     | 5.27     |
| Q7JWW6    | Ady43A OS=Drosophila melanogaster GN=Ady43A PE=2 SV=1 - [Q7JWW6_DROME]                                                                         | 0.00  | 2.19     | 1          | 1                 | 1          | 2      | 8.124E7 | 366   | 40.3     | 5.83     |
| Q870K8    | Aldehyde dehydrogenase type III, isoform J OS=Drosophila melanogaster GN=Aldh-III PE=2 SV=1 - [Q870K8_DROME]                                   | 0.00  | 7.72     | 5          | 2                 | 2          | 2      | 1.217E7 | 337   | 37.7     | 5.10     |
| Q9VKB2    | CG5336-PA OS=Drosophila melanogaster GN=Ced-12 PE=1 SV=1 - [Q9VKB2_DROME]                                                                      | 0.00  | 2.49     | 1          | 2                 | 2          | 2      | 7.834E7 | 724   | 82.9     | 6.19     |
| Q9VLE1    | CG13108-PA OS=Drosophila melanogaster GN=CG13108 PE=2 SV=1 - [Q9VLE1_DROME]                                                                    | 0.00  | 3.86     | 1          | 1                 | 1          | 1      | 1.333E7 | 233   | 26.9     | 4.94     |
| Q9VBQ3    | CG5111 OS=Drosophila melanogaster GN=CG5111-RA PE=2 SV=1 - [Q9VBQ3_DROME]                                                                      | 0.00  | 1.95     | 1          | 1                 | 1          | 1      | 6.991E6 | 614   | 69.9     | 5.27     |
| Q9VS66    | CG8562 OS=Drosophila melanogaster GN=CG8562 PE=2 SV=1 - [Q9VS66_DROME]                                                                         | 0.00  | 7.08     | 1          | 1                 | 1          | 1      |         | 424   | 47.7     | 4.97     |
| Q9W2L2    | LD27118p OS=Drosophila melanogaster GN=Magi PE=2 SV=2 - [Q9W2L2_DROME]                                                                         | 0.00  | 1.83     | 1          | 1                 | 1          | 1      |         | 1202  | 130.5    | 6.51     |
| Q7K0G5    | CG8008, isoform A OS=Drosophila melanogaster GN=CG8008 PE=2 SV=1 - [Q7K0G5_DROME]                                                              | 0.00  | 4.78     | 2          | 1                 | 1          | 1      | 1.796E7 | 439   | 49.8     | 8.62     |
| Q6NP69    | GST-containing FLYWCH zinc-finger protein OS=Drosophila melanogaster GN=gzfz PE=2 SV=1 - [Q6NP69_DROME]                                        | 0.00  | 2.97     | 4          | 2                 | 3          | 3      | 9.581E6 | 1045  | 119.2    | 5.99     |
| Q7K1U0    | Arc1 OS=Drosophila melanogaster GN=Arc1 PE=2 SV=1 - [Q7K1U0_DROME]                                                                             | 0.00  | 4.72     | 1          | 1                 | 1          | 1      | 6.601E7 | 254   | 28.9     | 6.47     |
| A1ZAC0    | FI03676p OS=Drosophila melanogaster GN=Tsf3 PE=2 SV=1 - [A1ZAC0_DROME]                                                                         | 0.00  | 1.82     | 1          | 1                 | 1          | 1      | 1.153E7 | 714   | 81.0     | 6.89     |
| Q8MKK1    | CG30185 OS=Drosophila melanogaster GN=CG30185;Gr59f PE=2 SV=1 - [Q8MKK1_DROME]                                                                 | 0.00  | 6.15     | 1          | 1                 | 1          | 1      |         | 179   | 20.0     | 7.03     |
| Q9VBV1    | CG11854 (Fragment) OS=Drosophila melanogaster GN=CG11854-RA PE=2 SV=3 - [Q9VBV1_DROME]                                                         | 0.00  | 8.70     | 1          | 1                 | 1          | 1      | 4.098E7 | 253   | 28.2     | 7.23     |
| Q9YX1     | HDAC6 OS=Drosophila melanogaster GN=HDAC6 PE=2 SV=1 - [Q9YX1_DROME]                                                                            | 0.00  | 0.79     | 7          | 1                 | 1          | 1      | 5.868E8 | 883   | 98.2     | 6.48     |
| Q9VVG1    | CG13728 OS=Drosophila melanogaster GN=CG13728-RA PE=2 SV=4 - [Q9VVG1_DROME]                                                                    | 0.00  | 2.66     | 1          | 1                 | 1          | 1      |         | 753   | 85.7     | 9.48     |
| Q9W3C3    | CG2004, isoform A OS=Drosophila melanogaster GN=CG2004 PE=2 SV=1 - [Q9W3C3_DROME]                                                              | 0.00  | 2.35     | 1          | 1                 | 1          | 1      | 8.069E7 | 425   | 48.3     | 5.21     |
| Q4V5A7    | CG7229 OS=Drosophila melanogaster GN=CG7229 PE=2 SV=1 - [Q4V5A7_DROME]                                                                         | 0.00  | 5.93     | 1          | 1                 | 1          | 1      |         | 674   | 74.6     | 9.52     |
| Q8MY02    | FI14518p OS=Drosophila melanogaster GN=pxb PE=2 SV=1 - [Q8MY02_DROME]                                                                          | 0.00  | 1.73     | 1          | 1                 | 1          | 5      |         | 636   | 69.0     | 6.79     |
| O46102    | CG11418, isoform A OS=Drosophila melanogaster GN=fs(1)N PE=2 SV=2 - [O46102_DROME]                                                             | 0.00  | 3.92     | 1          | 1                 | 1          | 1      |         | 612   | 68.5     | 8.34     |
| M9PCW4    | CG44004, isoform B OS=Drosophila melanogaster GN=CG44004 PE=4 SV=2 - [M9PCW4_DROME]                                                            | 0.00  | 2.99     | 1          | 1                 | 1          | 1      |         | 368   | 43.3     | 7.96     |
| Q9W362    | LD09531p OS=Drosophila melanogaster GN=Larp7 PE=2 SV=1 - [Q9W362_DROME]                                                                        | 0.00  | 1.85     | 1          | 1                 | 1          | 1      | 1.416E7 | 595   | 67.3     | 7.36     |
| H8F4P0    | FI18115p1 OS=Drosophila melanogaster GN=MED1 PE=2 SV=1 - [H8F4P0_DROME]                                                                        | 0.00  | 2.87     | 3          | 1                 | 1          | 1      |         | 1080  | 111.4    | 9.19     |
| Q3ZAQ1    | CG7029, isoform B OS=Drosophila melanogaster GN=CG7029 PE=2 SV=1 - [Q3ZAQ1_DROME]                                                              | 0.00  | 3.41     | 3          | 1                 | 1          | 1      | 1.312E6 | 909   | 99.2     | 9.58     |
| Q9I7M3    | CG10237, isoform A OS=Drosophila melanogaster GN=CG10237 PE=4 SV=1 - [Q9I7M3_DROME]                                                            | 0.00  | 8.64     | 3          | 2                 | 2          | 2      | 1.761E7 | 301   | 35.1     | 8.51     |



| Accession | Description                                                                                                                                                    | Score | Coverage | # Proteins | # Unique Peptides | # Peptides | # PSMs | Area    | # AAs | MW [kDa] | calc. pI |
|-----------|----------------------------------------------------------------------------------------------------------------------------------------------------------------|-------|----------|------------|-------------------|------------|--------|---------|-------|----------|----------|
| Q8T019    | CG11326-PC, isoform C OS=Drosophila melanogaster GN=Tsp PE=2 SV=1 - [Q8T019_DROME]                                                                             | 0.00  | 5.73     | 2          | 1                 | 1          | 1      |         | 419   | 47.3     | 8.10     |
| Q8IRH4    | CG9181-PD, isoform D OS=Drosophila melanogaster GN=Ptp61F PE=4 SV=1 - [Q8IRH4_DROME]                                                                           | 0.00  | 3.02     | 2          | 1                 | 1          | 1      | 6.665E6 | 431   | 48.5     | 5.20     |
| Q9VTE1    | CG32069-PA OS=Drosophila melanogaster GN=CG32069 PE=2 SV=2 - [Q9VTE1_DROME]                                                                                    | 0.00  | 10.00    | 1          | 1                 | 1          | 1      |         | 80    | 9.0      | 9.11     |
| Q9VZG9    | TipE homolog 2, isoform A OS=Drosophila melanogaster GN=Teh2 PE=2 SV=1 - [Q9VZG9_DROME]                                                                        | 0.00  | 5.83     | 2          | 1                 | 1          | 1      |         | 309   | 34.2     | 6.13     |
| Q9VBC4    | AT02583p OS=Drosophila melanogaster GN=CG6420 PE=2 SV=2 - [Q9VBC4_DROME]                                                                                       | 0.00  | 3.41     | 1          | 1                 | 1          | 3      | 1.493E7 | 909   | 95.6     | 7.33     |
| Q8XSX7    | CG3734 OS=Drosophila melanogaster GN=CG3734 PE=2 SV=1 - [Q8XSX7_DROME]                                                                                         | 0.00  | 3.17     | 1          | 1                 | 1          | 1      | 1.308E7 | 473   | 53.2     | 5.02     |
| Q9V415    | BcDNA.LD23587 OS=Drosophila melanogaster GN=Hrd3 PE=2 SV=1 - [Q9V415_DROME]                                                                                    | 0.00  | 3.17     | 1          | 1                 | 1          | 1      | 1.460E6 | 819   | 89.3     | 5.60     |
| M9PF73    | CG43896, isoform C OS=Drosophila melanogaster GN=CG43896 PE=4 SV=1 - [M9PF73_DROME]                                                                            | 0.00  | 0.57     | 1          | 1                 | 1          | 1      | 3.642E7 | 2113  | 229.2    | 4.59     |
| Q9VNA3    | CG11999 OS=Drosophila melanogaster GN=CG11999 PE=2 SV=1 - [Q9VNA3_DROME]                                                                                       | 0.00  | 5.09     | 1          | 1                 | 1          | 1      |         | 216   | 23.6     | 6.80     |
| Q9W3D8    | AT17652p OS=Drosophila melanogaster GN=CG12111 PE=2 SV=1 - [Q9W3D8_DROME]                                                                                      | 0.00  | 6.91     | 1          | 1                 | 1          | 1      |         | 188   | 21.8     | 5.59     |
| Q7KUE8    | CG6216 OS=Drosophila melanogaster GN=CG6216-RB PE=2 SV=1 - [Q7KUE8_DROME]                                                                                      | 0.00  | 2.98     | 1          | 1                 | 1          | 1      | 1.861E6 | 235   | 27.0     | 9.57     |
| Q9VGV9    | LD25118p OS=Drosophila melanogaster GN=mRpl37 PE=2 SV=3 - [Q9VGV9_DROME]                                                                                       | 0.00  | 4.17     | 1          | 1                 | 1          | 1      | 2.949E6 | 408   | 45.7     | 9.52     |
| Q9VFE9    | CG7265 OS=Drosophila melanogaster GN=CG7265 PE=2 SV=1 - [Q9VFE9_DROME]                                                                                         | 0.00  | 5.33     | 1          | 1                 | 1          | 1      |         | 469   | 52.1     | 5.25     |
| Q0E8T7    | CG34124 OS=Drosophila melanogaster GN=CG34124 PE=2 SV=1 - [Q0E8T7_DROME]                                                                                       | 0.00  | 1.60     | 1          | 1                 | 1          | 1      |         | 2003  | 232.3    | 5.38     |
| Q9VM10    | Scavenger receptor acting in neural tissue and majority of rhodopsin is absent, isoform A OS=Drosophila melanogaster GN=santa-maria PE=4 SV=2 - [Q9VM10_DROME] | 0.00  | 6.04     | 1          | 1                 | 1          | 1      | 1.692E6 | 563   | 62.9     | 5.67     |
| Q9W0T7    | CG16940, isoform A OS=Drosophila melanogaster GN=CG16940 PE=2 SV=2 - [Q9W0T7_DROME]                                                                            | 0.00  | 2.03     | 2          | 1                 | 1          | 1      |         | 1032  | 116.8    | 8.18     |
| Q9W1L1    | Mitochondrial ribosomal protein L43 OS=Drosophila melanogaster GN=mRpl43 PE=2 SV=1 - [Q9W1L1_DROME]                                                            | 0.00  | 14.06    | 1          | 1                 | 1          | 1      | 2.888E7 | 192   | 22.0     | 9.26     |
| A1ZAB3    | FI18312p1 OS=Drosophila melanogaster GN=Ptp52F PE=2 SV=2 - [A1ZAB3_DROME]                                                                                      | 0.00  | 2.79     | 1          | 1                 | 1          | 1      |         | 1433  | 160.0    | 5.20     |
| Q0KIE7    | Ankyrin, isoform B OS=Drosophila melanogaster GN=Ank PE=2 SV=1 - [Q0KIE7_DROME]                                                                                | 0.00  | 0.71     | 1          | 1                 | 1          | 1      | 5.490E7 | 1549  | 170.7    | 7.05     |
| Q9VCX7    | CG31156 OS=Drosophila melanogaster GN=CG31156 PE=2 SV=3 - [Q9VCX7_DROME]                                                                                       | 0.00  | 5.06     | 1          | 2                 | 2          | 3      |         | 948   | 106.4    | 8.87     |
| Q9VF04    | RE32990p OS=Drosophila melanogaster GN=Rbf2 PE=2 SV=1 - [Q9VF04_DROME]                                                                                         | 0.00  | 1.40     | 1          | 1                 | 1          | 1      |         | 783   | 89.8     | 8.00     |
| B9A0M4    | CG42355, isoform C OS=Drosophila melanogaster GN=CG42355-RB PE=2 SV=1 - [B9A0M4_DROME]                                                                         | 0.00  | 12.42    | 4          | 1                 | 1          | 1      |         | 161   | 18.8     | 10.78    |
| Q9VLY7    | GH05679p OS=Drosophila melanogaster GN=Tep3 PE=2 SV=2 - [Q9VLY7_DROME]                                                                                         | 0.00  | 0.41     | 1          | 1                 | 1          | 1      | 9.714E7 | 1469  | 163.8    | 6.84     |
| Q9VAH2    | CG7837 OS=Drosophila melanogaster GN=CG7837 PE=2 SV=2 - [Q9VAH2_DROME]                                                                                         | 0.00  | 3.18     | 1          | 1                 | 1          | 2      |         | 975   | 110.6    | 5.77     |
| Q9VZX0    | CG9970-PA OS=Drosophila melanogaster GN=CG9970-RA PE=2 SV=2 - [Q9VZX0_DROME]                                                                                   | 0.00  | 4.34     | 1          | 1                 | 1          | 1      |         | 484   | 56.1     | 7.88     |
| Q9VTW3    | CG4328 OS=Drosophila melanogaster GN=CG4328-RA PE=2 SV=2 - [Q9VTW3_DROME]                                                                                      | 0.00  | 4.41     | 1          | 1                 | 1          | 1      |         | 544   | 59.6     | 7.88     |
| Q7KUW6    | Chascon, isoform B OS=Drosophila melanogaster GN=chas PE=4 SV=1 - [Q7KUW6_DROME]                                                                               | 0.00  | 2.91     | 3          | 1                 | 1          | 1      | 1.201E6 | 1031  | 116.4    | 9.86     |
| Q9W2E6    | Poor lmd response upon knock-in OS=Drosophila melanogaster GN=pirk PE=2 SV=1 - [Q9W2E6_DROME]                                                                  | 0.00  | 6.60     | 1          | 1                 | 1          | 1      |         | 197   | 21.2     | 9.14     |
| Q9VU51    | CG11280-PA OS=Drosophila melanogaster GN=trn PE=2 SV=1 - [Q9VU51_DROME]                                                                                        | 0.00  | 2.04     | 2          | 1                 | 1          | 1      | 1.624E6 | 737   | 81.9     | 7.58     |
| Q9VK63    | CG5776, isoform A OS=Drosophila melanogaster GN=CG5776 PE=2 SV=1 - [Q9VK63_DROME]                                                                              | 0.00  | 1.88     | 1          | 1                 | 1          | 1      | 1.079E7 | 799   | 89.0     | 6.79     |
| Q9VYH4    | CG12715, isoform A OS=Drosophila melanogaster GN=CG12715-RA PE=2 SV=1 - [Q9VYH4_DROME]                                                                         | 0.00  | 4.75     | 1          | 1                 | 1          | 1      | 5.661E8 | 505   | 58.7     | 6.61     |
| Q9V9U9    | CG11563 OS=Drosophila melanogaster GN=CG11563-RA PE=2 SV=2 - [Q9V9U9_DROME]                                                                                    | 0.00  | 3.86     | 1          | 1                 | 1          | 1      |         | 207   | 24.7     | 9.94     |
| Q9VXA0    | CG9104-PA OS=Drosophila melanogaster GN=CG9104 PE=2 SV=1 - [Q9VXA0_DROME]                                                                                      | 0.00  | 3.40     | 1          | 1                 | 1          | 1      | 2.753E6 | 412   | 46.3     | 8.21     |
| Q9VKW2    | LD12022p OS=Drosophila melanogaster GN=pie PE=2 SV=1 - [Q9VKW2_DROME]                                                                                          | 0.00  | 1.89     | 1          | 1                 | 1          | 2      |         | 582   | 66.0     | 5.80     |
| Q9VA37    | DJ-1 beta OS=Drosophila melanogaster GN=dj-1beta PE=1 SV=2 - [Q9VA37_DROME]                                                                                    | 0.00  | 10.24    | 1          | 1                 | 1          | 1      | 8.932E7 | 205   | 21.4     | 7.94     |
| B7YZM9    | Syndecan OS=Drosophila melanogaster GN=Sdc PE=2 SV=1 - [B7YZM9_DROME]                                                                                          | 0.00  | 6.53     | 3          | 1                 | 1          | 1      |         | 398   | 42.0     | 4.48     |
| Q95TJ6    | CG8907 OS=Drosophila melanogaster GN=CG8907 PE=2 SV=1 - [Q95TJ6_DROME]                                                                                         | 0.00  | 2.81     | 1          | 1                 | 1          | 2      | 4.013E7 | 712   | 80.1     | 6.34     |
| Q9VH62    | CG9467 OS=Drosophila melanogaster GN=CG9467 PE=2 SV=1 - [Q9VH62_DROME]                                                                                         | 0.00  | 3.56     | 1          | 1                 | 1          | 1      | 1.875E7 | 730   | 80.1     | 6.61     |
| Q9VSP0    | CG6511, isoform A OS=Drosophila melanogaster GN=CG6511 PE=2 SV=2 - [Q9VSP0_DROME]                                                                              | 0.00  | 2.73     | 1          | 2                 | 2          | 2      | 3.982E6 | 1211  | 137.2    | 6.42     |
| Q9VYR1    | Regucalcin homologue OS=Drosophila melanogaster GN=regucalcin PE=2 SV=1 - [Q9VYR1_DROME]                                                                       | 0.00  | 3.96     | 2          | 1                 | 1          | 1      |         | 303   | 33.6     | 6.40     |
| Q9VG51    | CG6359 OS=Drosophila melanogaster GN=Snx3 PE=2 SV=1 - [Q9VG51_DROME]                                                                                           | 0.00  | 5.39     | 1          | 1                 | 1          | 2      | 2.542E7 | 167   | 19.4     | 9.14     |
| Q9VCS7    | GH07323p OS=Drosophila melanogaster GN=Nha2 PE=2 SV=2 - [Q9VCS7_DROME]                                                                                         | 0.00  | 1.20     | 1          | 1                 | 1          | 1      |         | 584   | 62.7     | 8.92     |
| Q9VF37    | Crossover suppressor on 3 of Gowen OS=Drosophila melanogaster GN=c(3)G PE=2 SV=1 - [Q9VF37_DROME]                                                              | 0.00  | 1.48     | 1          | 1                 | 1          | 1      | 3.975E8 | 744   | 85.7     | 6.23     |
| A1ZAQ7    | Chitin deacetylase-like 9 OS=Drosophila melanogaster GN=Cda9 PE=2 SV=1 - [A1ZAQ7_DROME]                                                                        | 0.00  | 1.51     | 1          | 1                 | 1          | 1      | 2.898E7 | 397   | 45.1     | 6.71     |
| O76892    | EG:4F1.1 protein OS=Drosophila melanogaster GN=Scgdelta PE=2 SV=1 - [O76892_DROME]                                                                             | 0.00  | 5.45     | 1          | 1                 | 1          | 1      |         | 404   | 42.6     | 9.48     |
| Q3YBY4    | Virus-induced 1 OS=Drosophila melanogaster GN=vir-1 PE=2 SV=1 - [Q3YBY4_DROME]                                                                                 | 0.00  | 5.16     | 3          | 1                 | 1          | 1      | 5.969E5 | 155   | 18.3     | 4.13     |
| Q9W2J4    | CG4302 OS=Drosophila melanogaster GN=BEST:GH09393 PE=2 SV=2 - [Q9W2J4_DROME]                                                                                   | 0.00  | 2.63     | 1          | 1                 | 1          | 1      | 2.890E8 | 532   | 60.1     | 9.04     |
| Q9VMK5    | CG13997-PA OS=Drosophila melanogaster GN=Vm26Ac PE=2 SV=1 - [Q9VMK5_DROME]                                                                                     | 0.00  | 11.05    | 1          | 1                 | 1          | 2      |         | 181   | 18.5     | 8.35     |
| Q9VMU2    | CG5828, isoform A OS=Drosophila melanogaster GN=CG5828 PE=4 SV=1 - [Q9VMU2_DROME]                                                                              | 0.00  | 6.93     | 1          | 1                 | 1          | 1      |         | 361   | 40.4     | 5.53     |
| Q8SZU1    | CG43755, isoform D OS=Drosophila melanogaster GN=CG33992 PE=2 SV=1 - [Q8SZU1_DROME]                                                                            | 0.00  | 3.44     | 1          | 1                 | 1          | 1      |         | 407   | 46.0     | 8.25     |

| Accession | Description                                                                                                                         | Score | Coverage | # Proteins | # Unique Peptides | # Peptides | # PSMs | Area    | # AAs | MW [kDa] | calc. pI |
|-----------|-------------------------------------------------------------------------------------------------------------------------------------|-------|----------|------------|-------------------|------------|--------|---------|-------|----------|----------|
| O61722    | CG4993-PA, isoform A OS=Drosophila melanogaster GN=PRL-1 PE=2 SV=2 - [O61722_DROME]                                                 | 0.00  | 10.80    | 1          | 1                 | 1          | 1      |         | 176   | 20.0     | 8.63     |
| Q9VGN7    | AT25352p OS=Drosophila melanogaster GN=CG6744 PE=2 SV=2 - [Q9VGN7_DROME]                                                            | 0.00  | 2.57     | 1          | 1                 | 1          | 1      |         | 583   | 66.8     | 8.81     |
| Q9VID9    | CG8677, isoform B OS=Drosophila melanogaster GN=CG8677 PE=4 SV=3 - [Q9VID9_DROME]                                                   | 0.00  | 0.34     | 1          | 1                 | 1          | 1      | 8.662E7 | 2663  | 292.4    | 5.27     |
| Q9NCC3    | Sorting nexin OS=Drosophila melanogaster GN=SH3PX1 PE=2 SV=1 - [Q9NCC3_DROME]                                                       | 0.00  | 6.73     | 1          | 2                 | 2          | 2      | 1.305E7 | 565   | 63.1     | 6.77     |
| A8JV36    | Trf4-1, isoform F OS=Drosophila melanogaster GN=Trf4-1 PE=4 SV=1 - [A8JV36_DROME]                                                   | 0.00  | 2.87     | 2          | 1                 | 1          | 1      | 1.942E6 | 802   | 88.0     | 7.61     |
| Q9VC41    | CG42331, isoform C OS=Drosophila melanogaster GN=CG42331-RC PE=2 SV=1 - [Q9VC41_DROME]                                              | 0.00  | 0.42     | 2          | 1                 | 1          | 1      | 2.088E7 | 1439  | 159.9    | 7.27     |
| Q9VCP5    | CG13826 OS=Drosophila melanogaster GN=cnc PE=2 SV=2 - [Q9VCP5_DROME]                                                                | 0.00  | 7.92     | 1          | 1                 | 1          | 1      | 1.266E7 | 101   | 11.2     | 9.99     |
| Q8MRG6    | Precursor RNA processing 3, isoform B OS=Drosophila melanogaster GN=Prp3 PE=2 SV=1 - [Q8MRG6_DROME]                                 | 0.00  | 1.33     | 2          | 1                 | 1          | 1      | 5.148E7 | 528   | 60.1     | 9.73     |
| Q9VAE4    | CG31036, isoform A OS=Drosophila melanogaster GN=CG31036 PE=2 SV=2 - [Q9VAE4_DROME]                                                 | 0.00  | 1.29     | 2          | 1                 | 1          | 1      |         | 1007  | 112.0    | 6.87     |
| Q7JXC4    | CG6459 OS=Drosophila melanogaster GN=P32 PE=2 SV=1 - [Q7JXC4_DROME]                                                                 | 0.00  | 4.56     | 1          | 1                 | 1          | 1      |         | 263   | 29.0     | 5.08     |
| Q8IR81    | CG32652-PA OS=Drosophila melanogaster GN=CG32652 PE=2 SV=1 - [Q8IR81_DROME]                                                         | 0.00  | 26.51    | 1          | 1                 | 1          | 1      |         | 83    | 9.7      | 7.25     |
| Q9VUZ6    | FI05332p OS=Drosophila melanogaster GN=l(3)72Dn PE=2 SV=1 - [Q9VUZ6_DROME]                                                          | 0.00  | 2.16     | 2          | 1                 | 1          | 1      | 3.363E6 | 696   | 78.6     | 8.76     |
| Q7K231    | CG7747 OS=Drosophila melanogaster GN=CG7747 PE=2 SV=1 - [Q7K231_DROME]                                                              | 0.00  | 2.13     | 1          | 1                 | 1          | 1      | 2.885E6 | 517   | 58.9     | 8.13     |
| Q8IR17    | Gpi1, isoform B OS=Drosophila melanogaster GN=Gpi1 PE=4 SV=3 - [Q8IR17_DROME]                                                       | 0.00  | 3.12     | 1          | 1                 | 1          | 1      |         | 481   | 56.0     | 8.18     |
| Q7PLT4    | Tim17b, isoform A OS=Drosophila melanogaster GN=Tim17b PE=4 SV=1 - [Q7PLT4_DROME]                                                   | 0.00  | 9.83     | 1          | 1                 | 1          | 1      | 9.285E6 | 173   | 18.2     | 8.18     |
| Q9VR29    | CG3225 OS=Drosophila melanogaster GN=CG3225 PE=2 SV=2 - [Q9VR29_DROME]                                                              | 0.00  | 3.24     | 1          | 1                 | 1          | 1      | 7.272E5 | 678   | 76.1     | 7.97     |
| Q0E930    | CG30116, isoform B OS=Drosophila melanogaster GN=CG30116 PE=4 SV=1 - [Q0E930_DROME]                                                 | 0.00  | 1.41     | 3          | 1                 | 1          | 2      |         | 1698  | 190.5    | 6.68     |
| Q9VGU6    | GTP:AMP phosphotransferase, mitochondrial OS=Drosophila melanogaster GN=Adk3 PE=2 SV=1 - [Q9VGU6_DROME]                             | 0.00  | 4.63     | 1          | 1                 | 1          | 1      | 1.664E6 | 216   | 24.1     | 9.32     |
| Q9VZ85    | Rho guanine nucleotide exchange factor at 64C, isoform A OS=Drosophila melanogaster GN=RhoGEF64C PE=4 SV=2 - [Q9VZ85_DROME]         | 0.00  | 0.76     | 1          | 1                 | 1          | 1      |         | 1984  | 214.8    | 6.80     |
| Q9XYZ4    | CG16928-PA OS=Drosophila melanogaster GN=mre11 PE=2 SV=1 - [Q9XYZ4_DROME]                                                           | 0.00  | 3.87     | 1          | 1                 | 1          | 1      |         | 620   | 69.2     | 5.95     |
| Q9W1F6    | Fizzy-related 2 OS=Drosophila melanogaster GN=fzr2 PE=2 SV=1 - [Q9W1F6_DROME]                                                       | 0.00  | 2.44     | 1          | 1                 | 1          | 5      | 1.615E7 | 451   | 50.9     | 8.90     |
| Q9W3W4    | COQ7 OS=Drosophila melanogaster GN=COQ7 PE=2 SV=2 - [Q9W3W4_DROME]                                                                  | 0.00  | 5.02     | 1          | 1                 | 1          | 1      | 6.940E6 | 219   | 24.1     | 6.96     |
| Q9V3S7    | BcDNA.GH12326 OS=Drosophila melanogaster GN=BcDNA.GH12326 PE=2 SV=1 - [Q9V3S7_DROME]                                                | 0.00  | 2.80     | 1          | 1                 | 1          | 1      |         | 429   | 47.8     | 9.58     |
| Q6NR30    | CG14478, isoform A OS=Drosophila melanogaster GN=BEST.LD13441 PE=2 SV=1 - [Q6NR30_DROME]                                            | 0.00  | 4.10     | 1          | 1                 | 1          | 1      |         | 512   | 56.0     | 8.73     |
| Q9VKJ6    | CG6230-PA OS=Drosophila melanogaster GN=CG6230-RA PE=2 SV=1 - [Q9VKJ6_DROME]                                                        | 0.00  | 1.63     | 1          | 2                 | 2          | 2      | 1.096E7 | 1225  | 136.3    | 7.74     |
| Q7K4R6    | CG1868, isoform A OS=Drosophila melanogaster GN=CG1868 PE=2 SV=1 - [Q7K4R6_DROME]                                                   | 0.00  | 1.81     | 2          | 1                 | 1          | 1      |         | 718   | 83.0     | 6.34     |
| Q9W4I7    | Partner of numb OS=Drosophila melanogaster GN=pon PE=2 SV=1 - [Q9W4I7_DROME]                                                        | 0.00  | 1.34     | 1          | 1                 | 1          | 1      |         | 670   | 76.1     | 6.90     |
| Q9VJ82    | Kon-tiki, isoform B OS=Drosophila melanogaster GN=kon PE=4 SV=3 - [Q9VJ82_DROME]                                                    | 0.00  | 1.13     | 1          | 1                 | 1          | 1      |         | 2381  | 270.5    | 5.76     |
| Q9VHN4    | CG8043 OS=Drosophila melanogaster GN=CG8043 PE=2 SV=1 - [Q9VHN4_DROME]                                                              | 0.00  | 5.75     | 1          | 1                 | 1          | 1      | 9.959E6 | 348   | 39.5     | 8.68     |
| Q9VVT6    | CG6852, isoform C OS=Drosophila melanogaster GN=CG6852 PE=2 SV=1 - [Q9VVT6_DROME]                                                   | 0.00  | 8.77     | 1          | 1                 | 1          | 2      | 4.071E7 | 114   | 12.4     | 8.44     |
| Q9W1H0    | CG5591 OS=Drosophila melanogaster GN=Lpt PE=2 SV=2 - [Q9W1H0_DROME]                                                                 | 0.00  | 1.08     | 1          | 1                 | 1          | 1      | 1.894E7 | 1482  | 164.4    | 6.99     |
| Q9W0Q5    | CG13891-PA OS=Drosophila melanogaster GN=CG13891-RA PE=2 SV=1 - [Q9W0Q5_DROME]                                                      | 0.00  | 15.19    | 1          | 1                 | 1          | 1      |         | 158   | 18.0     | 5.39     |
| Q9VVV6    | CG18135-PB, isoform B OS=Drosophila melanogaster GN=CG18135 PE=2 SV=2 - [Q9VVV6_DROME]                                              | 0.00  | 2.67     | 5          | 1                 | 1          | 1      | 9.486E7 | 636   | 72.0     | 6.32     |
| Q9VWC0    | Histone gene-specific epigenetic repressor in late S phase, isoform A OS=Drosophila melanogaster GN=Hers PE=4 SV=2 - [Q9VWC0_DROME] | 0.00  | 0.63     | 1          | 1                 | 1          | 1      |         | 2529  | 270.5    | 9.10     |
| Q7JQT9    | CG1671 OS=Drosophila melanogaster GN=CG1671 PE=2 SV=1 - [Q7JQT9_DROME]                                                              | 0.00  | 1.40     | 1          | 1                 | 1          | 1      | 5.545E7 | 787   | 88.5     | 7.44     |
| Q9VXQ2    | GRAF ortholog, isoform A OS=Drosophila melanogaster GN=Graf PE=4 SV=3 - [Q9VXQ2_DROME]                                              | 0.00  | 2.36     | 2          | 1                 | 1          | 1      |         | 1016  | 114.6    | 8.15     |
| Q9VAI7    | Odorant-binding protein 99d OS=Drosophila melanogaster GN=Obp99d PE=2 SV=1 - [Q9VAI7_DROME]                                         | 0.00  | 9.49     | 1          | 1                 | 1          | 1      |         | 137   | 15.9     | 5.52     |
| Q9I7S6    | Phosphodiesterase 9, isoform B OS=Drosophila melanogaster GN=Pde9 PE=4 SV=2 - [Q9I7S6_DROME]                                        | 0.00  | 0.98     | 2          | 1                 | 1          | 1      | 8.164E7 | 1526  | 162.7    | 6.20     |
| Q9VIF2    | CG9248, isoform A OS=Drosophila melanogaster GN=CG9248 PE=2 SV=1 - [Q9VIF2_DROME]                                                   | 0.00  | 3.64     | 1          | 1                 | 1          | 1      |         | 494   | 55.6     | 6.14     |
| D0IQA3    | CG42570, isoform A OS=Drosophila melanogaster GN=CG42570 PE=2 SV=1 - [D0IQA3_DROME]                                                 | 0.00  | 3.44     | 1          | 1                 | 1          | 1      |         | 100   | 70.6     | 5.44     |
| O18475    | FI03732p OS=Drosophila melanogaster GN=mus308 PE=2 SV=1 - [O18475_DROME]                                                            | 0.00  | 0.63     | 1          | 1                 | 1          | 1      | 7.961E7 | 2059  | 229.7    | 7.17     |
| Q9VVQ5    | CG18234 OS=Drosophila melanogaster GN=CG18234 PE=2 SV=4 - [Q9VVQ5_DROME]                                                            | 0.00  | 4.08     | 1          | 1                 | 1          | 1      | 4.864E6 | 515   | 58.9     | 5.72     |
| Q6NPB4    | CG1092, isoform B OS=Drosophila melanogaster GN=CG1092 PE=2 SV=1 - [Q6NPB4_DROME]                                                   | 0.00  | 7.62     | 1          | 1                 | 1          | 1      |         | 315   | 38.0     | 6.80     |
| B5X533    | CG8909, isoform C OS=Drosophila melanogaster GN=CG8909-RB PE=2 SV=1 - [B5X533_DROME]                                                | 0.00  | 1.34     | 2          | 1                 | 1          | 1      | 1.613E7 | 2008  | 225.6    | 6.25     |
| Q9VI64    | CG10098 OS=Drosophila melanogaster GN=CG10098 PE=2 SV=1 - [Q9VI64_DROME]                                                            | 0.00  | 4.53     | 1          | 1                 | 1          | 1      |         | 353   | 37.5     | 4.79     |
| Q9W275    | Alkaline phosphatase OS=Drosophila melanogaster GN=CG3292 PE=2 SV=1 - [Q9W275_DROME]                                                | 0.00  | 2.21     | 1          | 1                 | 1          | 1      |         | 543   | 58.2     | 5.14     |
| Q8MRA3    | Hibris, isoform A OS=Drosophila melanogaster GN=hbs PE=2 SV=1 - [Q8MRA3_DROME]                                                      | 0.00  | 1.06     | 2          | 1                 | 1          | 1      | 1.791E8 | 1228  | 133.5    | 7.01     |
| Q9W087    | CG2021-PA OS=Drosophila melanogaster GN=CG2021 PE=1 SV=1 - [Q9W087_DROME]                                                           | 0.00  | 7.37     | 2          | 1                 | 1          | 1      | 1.107E7 | 95    | 10.3     | 4.92     |
| Q7JW03    | CG2257 OS=Drosophila melanogaster GN=UbcE2H PE=2 SV=1 - [Q7JW03_DROME]                                                              | 0.00  | 4.37     | 1          | 1                 | 1          | 1      | 8.658E6 | 183   | 20.9     | 4.79     |
| M9PBY4    | CG11455, isoform H OS=Drosophila melanogaster GN=CG11455 PE=4 SV=1 - [M9PBY4_DROME]                                                 | 0.00  | 15.71    | 2          | 1                 | 1          | 1      | 1.274E7 | 70    | 8.5      | 7.85     |

| Accession | Description                                                                                                                               | Score | Coverage | # Proteins | # Unique Peptides | # Peptides | # PSMs | Area    | # AAs | MW [kDa] | calc. pI |
|-----------|-------------------------------------------------------------------------------------------------------------------------------------------|-------|----------|------------|-------------------|------------|--------|---------|-------|----------|----------|
| Q9VG46    | Lipase OS=Drosophila melanogaster GN=CG6753-RB PE=2 SV=2 - [Q9VG46_DROME]                                                                 | 0.00  | 2.22     | 1          | 1                 | 1          | 1      | 6.783E7 | 405   | 47.0     | 9.26     |
| Q9VC90    | CG5746, isoform A OS=Drosophila melanogaster GN=CG5746 PE=4 SV=2 - [Q9VC90_DROME]                                                         | 0.00  | 4.38     | 2          | 2                 | 2          | 2      | 1.348E9 | 457   | 46.5     | 9.73     |
| Q8T8S2    | Uridine phosphorylase OS=Drosophila melanogaster GN=CG3788 PE=2 SV=1 - [Q8T8S2_DROME]                                                     | 0.00  | 3.97     | 1          | 1                 | 1          | 1      | 3.318E7 | 378   | 41.6     | 5.95     |
| Q85YP9    | Mitochondrial ribosomal protein S5, isoform A OS=Drosophila melanogaster GN=mRpS5 PE=2 SV=1 - [Q85YP9_DROME]                              | 0.00  | 5.90     | 1          | 1                 | 1          | 1      | 407     | 46.0  | 10.20    |          |
| Q9VVJ0    | CG7510, isoform A OS=Drosophila melanogaster GN=CG7510 PE=2 SV=2 - [Q9VVJ0_DROME]                                                         | 0.00  | 2.74     | 2          | 1                 | 1          | 1      | 949     | 105.0 | 8.32     |          |
| Q76NQ0    | Dolichyl-diphosphooligosaccharide--protein glycosyltransferase subunit 1 OS=Drosophila melanogaster GN=CG33303 PE=3 SV=1 - [Q76NQ0_DROME] | 0.00  | 6.77     | 1          | 2                 | 2          | 2      | 2.417E7 | 458   | 51.7     | 8.05     |
| Q9VM55    | Uninflatable, isoform B OS=Drosophila melanogaster GN=uif PE=4 SV=3 - [Q9VM55_DROME]                                                      | 0.00  | 0.82     | 2          | 1                 | 1          | 1      | 1.091E6 | 3557  | 386.9    | 5.30     |
| Q9VZ84    | CG7509 OS=Drosophila melanogaster GN=CG7509 PE=2 SV=2 - [Q9VZ84_DROME]                                                                    | 0.00  | 4.39     | 1          | 1                 | 1          | 1      | 615     | 69.7  | 6.67     |          |
| Q9W429    | CG3071-PA OS=Drosophila melanogaster GN=EG:25E8.3 PE=2 SV=1 - [Q9W429_DROME]                                                              | 0.00  | 3.74     | 1          | 2                 | 2          | 2      | 3.801E7 | 535   | 60.3     | 9.32     |
| Q7K1M4    | CG1902, isoform A OS=Drosophila melanogaster GN=CG1902 PE=2 SV=1 - [Q7K1M4_DROME]                                                         | 0.00  | 4.81     | 1          | 1                 | 1          | 1      | 6.115E6 | 312   | 35.8     | 6.20     |
| Q9VJZ5    | LD07294p OS=Drosophila melanogaster GN=Tap42 PE=2 SV=2 - [Q9VJZ5_DROME]                                                                   | 0.00  | 7.37     | 1          | 1                 | 1          | 1      | 4.977E7 | 380   | 43.3     | 5.40     |
| Q4V6X9    | CG17385 OS=Drosophila melanogaster GN=CG17385 PE=2 SV=1 - [Q4V6X9_DROME]                                                                  | 0.00  | 10.43    | 1          | 1                 | 1          | 1      | 278     | 32.4  | 8.19     |          |
| Q86P21    | CG31721-PA OS=Drosophila melanogaster GN=Trim9 PE=2 SV=1 - [Q86P21_DROME]                                                                 | 0.00  | 1.92     | 2          | 1                 | 1          | 2      | 2.068E6 | 729   | 79.0     | 5.91     |
| Q9VBR0    | CG4553 OS=Drosophila melanogaster GN=CG4553 PE=2 SV=1 - [Q9VBR0_DROME]                                                                    | 0.00  | 4.13     | 1          | 1                 | 1          | 1      | 2.485E7 | 363   | 42.3     | 9.11     |
| Q81QG3    | Vacuolar H[+] ATPase 16kD subunit 3, isoform A OS=Drosophila melanogaster GN=Vha16-3 PE=3 SV=1 - [Q81QG3_DROME]                           | 0.00  | 11.39    | 1          | 1                 | 1          | 2      | 7.736E7 | 158   | 16.1     | 9.23     |
| Q7JR71    | Superoxide dismutase [Cu-Zn] OS=Drosophila melanogaster GN=Sod3 PE=2 SV=1 - [Q7JR71_DROME]                                                | 0.00  | 3.87     | 3          | 1                 | 1          | 1      | 2.785E8 | 181   | 19.2     | 6.51     |
| Q9VW59    | LD16419p OS=Drosophila melanogaster GN=RhoGDI PE=2 SV=1 - [Q9VW59_DROME]                                                                  | 0.00  | 3.48     | 1          | 1                 | 1          | 1      | 2.157E7 | 201   | 23.2     | 5.64     |
| Q9VX29    | CG12990 OS=Drosophila melanogaster GN=CG12990 PE=2 SV=2 - [Q9VX29_DROME]                                                                  | 0.00  | 1.96     | 1          | 1                 | 1          | 1      | 663     | 76.0  | 7.72     |          |
| Q9VUU6    | CG12713 OS=Drosophila melanogaster GN=CG12713 PE=2 SV=2 - [Q9VUU6_DROME]                                                                  | 0.00  | 3.04     | 1          | 1                 | 1          | 1      | 329     | 37.9  | 7.69     |          |
| Q9VV09    | CG4950, isoform B OS=Drosophila melanogaster GN=CG4950 PE=4 SV=2 - [Q9VV09_DROME]                                                         | 0.00  | 3.66     | 1          | 1                 | 1          | 1      | 574     | 65.1  | 6.34     |          |
| Q8T3J1    | CG31125 OS=Drosophila melanogaster GN=CG31125 PE=2 SV=1 - [Q8T3J1_DROME]                                                                  | 0.00  | 3.58     | 1          | 1                 | 1          | 1      | 391     | 44.1  | 6.81     |          |
| Q9VH45    | CG5359, isoform A OS=Drosophila melanogaster GN=Dic90F PE=2 SV=1 - [Q9VH45_DROME]                                                         | 0.00  | 5.78     | 1          | 1                 | 1          | 1      | 173     | 19.1  | 5.39     |          |
| Q9VKX8    | Dpr19, isoform A OS=Drosophila melanogaster GN=dpr19 PE=1 SV=2 - [Q9VKX8_DROME]                                                           | 0.00  | 7.01     | 1          | 1                 | 1          | 1      | 385     | 42.2  | 9.33     |          |
| Q9VDX1    | CG11626 OS=Drosophila melanogaster GN=CG11626-RB PE=2 SV=2 - [Q9VDX1_DROME]                                                               | 0.00  | 6.60     | 1          | 1                 | 1          | 1      | 379     | 42.7  | 5.31     |          |
| Q9VY42    | CG1461, isoform A OS=Drosophila melanogaster GN=CG1461 PE=2 SV=1 - [Q9VY42_DROME]                                                         | 0.00  | 3.39     | 1          | 1                 | 1          | 1      | 501     | 55.9  | 6.25     |          |
| Q9VYK0    | Smrtr, isoform D OS=Drosophila melanogaster GN=Smr PE=4 SV=3 - [Q9VYK0_DROME]                                                             | 0.00  | 1.00     | 2          | 2                 | 2          | 2      | 3601    | 378.9 | 9.44     |          |
| Q7K0L5    | LP01562p OS=Drosophila melanogaster GN=veil PE=2 SV=1 - [Q7K0L5_DROME]                                                                    | 0.00  | 2.17     | 1          | 1                 | 1          | 1      | 3.703E6 | 599   | 65.4     | 4.96     |
| Q7K0P0    | Juvenile hormone-inducible protein 26 OS=Drosophila melanogaster GN=JhI-26 PE=2 SV=1 - [Q7K0P0_DROME]                                     | 0.00  | 6.38     | 1          | 1                 | 1          | 1      | 2.061E7 | 439   | 50.9     | 5.24     |
| Q9VZU8    | CG1291-PA OS=Drosophila melanogaster GN=CG1291 PE=2 SV=1 - [Q9VZU8_DROME]                                                                 | 0.00  | 2.59     | 1          | 1                 | 1          | 1      | 424     | 48.6  | 8.15     |          |
| Q9VK19    | CG15481-PA OS=Drosophila melanogaster GN=Skif6 PE=2 SV=1 - [Q9VK19_DROME]                                                                 | 0.00  | 4.07     | 1          | 1                 | 1          | 1      | 3.101E6 | 246   | 27.0     | 6.07     |
| Q9VS47    | CG8602, isoform B OS=Drosophila melanogaster GN=CG8602 PE=2 SV=1 - [Q9VS47_DROME]                                                         | 0.00  | 2.09     | 1          | 1                 | 1          | 1      | 4.434E7 | 478   | 53.3     | 6.39     |
| Q9W139    | CG3565 OS=Drosophila melanogaster GN=CG3565 PE=2 SV=1 - [Q9W139_DROME]                                                                    | 0.00  | 5.74     | 1          | 1                 | 1          | 1      | 8.483E6 | 244   | 28.4     | 5.12     |
| Q8MQQ0    | CG10175, isoform B OS=Drosophila melanogaster GN=CG10175 PE=2 SV=1 - [Q8MQQ0_DROME]                                                       | 0.00  | 4.77     | 3          | 1                 | 1          | 2      | 524     | 58.8  | 6.23     |          |
| A1Z7T4    | FI18952p1 OS=Drosophila melanogaster GN=Pkn PE=2 SV=1 - [A1Z7T4_DROME]                                                                    | 0.00  | 1.53     | 7          | 1                 | 1          | 1      | 2.993E7 | 590   | 66.2     | 5.39     |
| Q7JR73    | LD20239p OS=Drosophila melanogaster GN=Rcd6 PE=2 SV=1 - [Q7JR73_DROME]                                                                    | 0.00  | 3.31     | 1          | 1                 | 1          | 1      | 513     | 56.8  | 8.82     |          |
| Q9W3N1    | CG1444 OS=Drosophila melanogaster GN=CG1444 PE=2 SV=1 - [Q9W3N1_DROME]                                                                    | 0.00  | 6.85     | 1          | 2                 | 2          | 2      | 3.538E7 | 321   | 35.1     | 9.47     |
| Q9VDZ1    | CG5555 OS=Drosophila melanogaster GN=CG5555 PE=2 SV=2 - [Q9VDZ1_DROME]                                                                    | 0.00  | 1.62     | 1          | 1                 | 1          | 1      | 555     | 63.1  | 6.14     |          |
| Q9VF20    | Heavy metal tolerance factor 1 OS=Drosophila melanogaster GN=Hmt-1 PE=2 SV=1 - [Q9VF20_DROME]                                             | 0.00  | 3.12     | 1          | 1                 | 1          | 1      | 5.379E8 | 866   | 97.8     | 8.37     |
| Q9VWP1    | CG7288 OS=Drosophila melanogaster GN=CG7288 PE=2 SV=2 - [Q9VWP1_DROME]                                                                    | 0.00  | 3.64     | 1          | 1                 | 1          | 1      | 1.258E7 | 494   | 57.5     | 8.46     |
| Q9VHW4    | FI21225p1 OS=Drosophila melanogaster GN=unc-45 PE=2 SV=1 - [Q9VHW4_DROME]                                                                 | 0.00  | 2.75     | 1          | 2                 | 2          | 2      | 4.890E6 | 947   | 105.0    | 5.78     |
| Q9VUM4    | AT16346p OS=Drosophila melanogaster GN=CG6888 PE=2 SV=1 - [Q9VUM4_DROME]                                                                  | 0.00  | 12.24    | 1          | 1                 | 1          | 1      | 1.182E8 | 196   | 22.0     | 5.95     |
| M9ND79    | CG43064, isoform A OS=Drosophila melanogaster GN=CG43064 PE=4 SV=1 - [M9ND79_DROME]                                                       | 0.00  | 4.37     | 1          | 1                 | 1          | 1      | 481     | 54.7  | 7.40     |          |
| Q9Y171    | BcDNA.GH02220 OS=Drosophila melanogaster GN=BcDNA.GH02220 PE=2 SV=1 - [Q9Y171_DROME]                                                      | 0.00  | 3.17     | 1          | 1                 | 1          | 1      | 441     | 48.7  | 9.55     |          |
| Q9VWL0    | Mec2 OS=Drosophila melanogaster GN=Mec2 PE=2 SV=1 - [Q9VWL0_DROME]                                                                        | 0.00  | 7.43     | 1          | 1                 | 1          | 1      | 7.957E5 | 350   | 38.6     | 5.25     |
| O62531    | AP-47 OS=Drosophila melanogaster GN=AP-1mu PE=2 SV=1 - [O62531_DROME]                                                                     | 0.00  | 2.82     | 1          | 1                 | 1          | 2      | 426     | 48.9  | 7.18     |          |
| Q7JUP3    | Caspar, isoform A OS=Drosophila melanogaster GN=casp PE=2 SV=1 - [Q7JUP3_DROME]                                                           | 0.00  | 1.73     | 1          | 1                 | 1          | 1      | 3.017E7 | 695   | 78.4     | 4.89     |
| Q9W044    | CG13810 OS=Drosophila melanogaster GN=CG13810-RA PE=2 SV=2 - [Q9W044_DROME]                                                               | 0.00  | 5.31     | 1          | 1                 | 1          | 1      | 490     | 55.4  | 8.02     |          |
| Q9W1D9    | Oxysterol-binding protein OS=Drosophila melanogaster GN=CG3860 PE=2 SV=1 - [Q9W1D9_DROME]                                                 | 0.00  | 3.74     | 1          | 1                 | 1          | 1      | 5.894E6 | 455   | 52.2     | 7.15     |
| Q9VL10    | AT10584p OS=Drosophila melanogaster GN=Mulk PE=2 SV=2 - [Q9VL10_DROME]                                                                    | 0.00  | 6.86     | 1          | 1                 | 1          | 1      | 5.074E6 | 408   | 45.7     | 8.37     |
| Q8IQZ1    | Glutathione synthetase OS=Drosophila melanogaster GN=GS PE=2 SV=2 - [Q8IQZ1_DROME]                                                        | 0.00  | 6.52     | 5          | 2                 | 2          | 2      | 2.442E6 | 491   | 54.6     | 6.01     |

| Accession | Description                                                                                                      | Score | Coverage | # Proteins | # Unique Peptides | # Peptides | # PSMs | Area    | # AAs | MW [kDa] | calc. pI |
|-----------|------------------------------------------------------------------------------------------------------------------|-------|----------|------------|-------------------|------------|--------|---------|-------|----------|----------|
| Q9VQB6    | Ataxin 7, isoform A OS=Drosophila melanogaster GN=Atxn7 PE=2 SV=1 - [Q9VQB6_DROME]                               | 0.00  | 1.96     | 1          | 1                 | 1          | 1      | 3.032E6 | 971   | 104.1    | 6.98     |
| Q9VLQ9    | LD22082p OS=Drosophila melanogaster GN=Snx6 PE=2 SV=2 - [Q9VLQ9_DROME]                                           | 0.00  | 3.56     | 2          | 1                 | 1          | 1      | 5.953E6 | 449   | 50.1     | 6.73     |
| Q9VWS4    | CG6531-PA OS=Drosophila melanogaster GN=wgn PE=1 SV=2 - [Q9VWS4_DROME]                                           | 0.00  | 4.37     | 1          | 1                 | 1          | 1      |         | 343   | 37.8     | 8.50     |
| Q7KW02    | Enhanced adult sensory threshold, isoform B OS=Drosophila melanogaster GN=east PE=4 SV=1 - [Q7KW02_DROME]        | 0.00  | 0.48     | 3          | 1                 | 1          | 1      | 2.268E7 | 2301  | 245.6    | 6.04     |
| O76863    | EG:100G10.3 protein OS=Drosophila melanogaster GN=eIF2B-beta PE=2 SV=1 - [O76863_DROME]                          | 0.00  | 4.83     | 1          | 1                 | 1          | 1      | 2.658E6 | 352   | 39.1     | 6.27     |
| Q9W253    | LD41023p OS=Drosophila melanogaster GN=mRpS29 PE=2 SV=1 - [Q9W253_DROME]                                         | 0.00  | 2.55     | 1          | 1                 | 1          | 1      | 1.822E7 | 392   | 44.3     | 8.41     |
| Q9W4R2    | CG2875, isoform B OS=Drosophila melanogaster GN=CG2875-RB PE=2 SV=1 - [Q9W4R2_DROME]                             | 0.00  | 2.22     | 2          | 1                 | 1          | 1      | 8.984E6 | 496   | 56.6     | 8.21     |
| Q9VZ55    | CG1582, isoform A OS=Drosophila melanogaster GN=CG1582 PE=2 SV=2 - [Q9VZ55_DROME]                                | 0.00  | 1.79     | 1          | 2                 | 2          | 3      |         | 1288  | 146.0    | 7.40     |
| Q9VLS4    | CG8498, isoform B OS=Drosophila melanogaster GN=CG8498 PE=2 SV=1 - [Q9VLS4_DROME]                                | 0.00  | 21.11    | 1          | 1                 | 1          | 1      | 1.748E7 | 90    | 9.9      | 5.45     |
| Q9VB22    | LD33695p OS=Drosophila melanogaster GN=pins PE=1 SV=1 - [Q9VB22_DROME]                                           | 0.00  | 1.52     | 1          | 1                 | 1          | 1      |         | 658   | 71.4     | 6.74     |
| Q9W0J9    | CG9119 OS=Drosophila melanogaster GN=CG9119 PE=2 SV=1 - [Q9W0J9_DROME]                                           | 0.00  | 9.32     | 1          | 1                 | 1          | 1      |         | 322   | 35.6     | 6.38     |
| Q1WWD1    | IP14862p OS=Drosophila melanogaster GN=nompA PE=2 SV=1 - [Q1WWD1_DROME]                                          | 0.00  | 2.43     | 3          | 1                 | 1          | 1      | 2.225E7 | 1027  | 116.8    | 6.29     |
| Q9VEB4    | CG7175 OS=Drosophila melanogaster GN=mTerf5 PE=2 SV=1 - [Q9VEB4_DROME]                                           | 0.00  | 3.39     | 1          | 1                 | 1          | 2      |         | 560   | 64.8     | 9.03     |
| O97066    | GM04682p OS=Drosophila melanogaster GN=twr PE=2 SV=1 - [O97066_DROME]                                            | 0.00  | 5.41     | 1          | 1                 | 1          | 1      |         | 185   | 21.0     | 8.85     |
| Q29QP5    | CG12914 OS=Drosophila melanogaster GN=CG12914 PE=2 SV=1 - [Q29QP5_DROME]                                         | 0.00  | 10.59    | 1          | 1                 | 1          | 1      |         | 255   | 29.9     | 9.64     |
| Q5BI31    | CG12179, isoform C OS=Drosophila melanogaster GN=CG12179 PE=2 SV=1 - [Q5BI31_DROME]                              | 0.00  | 1.51     | 1          | 1                 | 1          | 1      |         | 1322  | 148.0    | 9.31     |
| Q9W0N3    | CKII-alpha subunit interactor-3, isoform A OS=Drosophila melanogaster GN=CkiIalpha-i3 PE=2 SV=1 - [Q9W0N3_DROME] | 0.00  | 2.58     | 2          | 1                 | 1          | 1      | 4.218E6 | 387   | 44.3     | 8.88     |
| Q9VZV2    | Ch7 OS=Drosophila melanogaster GN=Ch7 PE=2 SV=3 - [Q9VZV2_DROME]                                                 | 0.00  | 1.97     | 1          | 1                 | 1          | 5      |         | 1013  | 113.2    | 6.33     |
| Q9W1N3    | Levy OS=Drosophila melanogaster GN=levy PE=2 SV=1 - [Q9W1N3_DROME]                                               | 0.00  | 7.34     | 1          | 1                 | 1          | 1      |         | 109   | 12.5     | 9.70     |
| Q86CW5    | Hmr OS=Drosophila melanogaster GN=Hmr PE=4 SV=1 - [Q86CW5_DROME]                                                 | 0.00  | 0.64     | 1          | 1                 | 1          | 1      | 2.332E8 | 1413  | 158.5    | 9.55     |
| Q7JR83    | CG11055, isoform A OS=Drosophila melanogaster GN=Hsl PE=2 SV=1 - [Q7JR83_DROME]                                  | 0.00  | 1.82     | 1          | 1                 | 1          | 1      | 2.640E7 | 881   | 97.4     | 5.33     |
| Q9V3A7    | Structural maintenance of chromosomes protein OS=Drosophila melanogaster GN=glu PE=2 SV=1 - [Q9V3A7_DROME]       | 0.00  | 0.92     | 1          | 1                 | 1          | 1      |         | 1409  | 159.8    | 6.15     |
| Q9VZN2    | CG32264, isoform B OS=Drosophila melanogaster GN=CG12604 PE=2 SV=2 - [Q9VZN2_DROME]                              | 0.00  | 3.04     | 1          | 1                 | 1          | 1      |         | 790   | 87.9     | 9.20     |
| Q9VMQ6    | CG31648 OS=Drosophila melanogaster GN=CG31648 PE=2 SV=2 - [Q9VMQ6_DROME]                                         | 0.00  | 2.49     | 1          | 1                 | 1          | 2      | 1.470E8 | 241   | 27.3     | 7.71     |
| Q81QV2    | CG32221 OS=Drosophila melanogaster GN=CG32221-RA PE=2 SV=2 - [Q81QV2_DROME]                                      | 0.00  | 3.94     | 1          | 1                 | 1          | 1      | 1.088E7 | 432   | 50.4     | 7.84     |
| Q9VCW3    | LP09464p OS=Drosophila melanogaster GN=Nup133 PE=2 SV=2 - [Q9VCW3_DROME]                                         | 0.00  | 1.67     | 1          | 2                 | 2          | 2      |         | 1200  | 135.1    | 5.63     |
| Q8SZ78    | CG11318 OS=Drosophila melanogaster GN=CG11318 PE=2 SV=1 - [Q8SZ78_DROME]                                         | 0.00  | 3.87     | 1          | 1                 | 1          | 1      | 1.006E8 | 820   | 90.4     | 7.25     |
| Q9VCD3    | CG13605 OS=Drosophila melanogaster GN=CG13605 PE=2 SV=2 - [Q9VCD3_DROME]                                         | 0.00  | 2.84     | 1          | 1                 | 1          | 1      | 4.245E6 | 669   | 72.0     | 6.74     |
| Q9VL16    | CG5676-PA OS=Drosophila melanogaster GN=CG5676 PE=2 SV=1 - [Q9VL16_DROME]                                        | 0.00  | 5.13     | 1          | 1                 | 1          | 1      | 9.354E7 | 156   | 17.3     | 9.20     |
| Q9VD14    | CG13850 OS=Drosophila melanogaster GN=CG13850 PE=2 SV=3 - [Q9VD14_DROME]                                         | 0.00  | 2.84     | 1          | 1                 | 1          | 1      |         | 564   | 61.8     | 9.13     |
| Q86PF5    | CG6167-PB, isoform B OS=Drosophila melanogaster GN=PICK1 PE=4 SV=1 - [Q86PF5_DROME]                              | 0.00  | 1.44     | 3          | 1                 | 1          | 1      | 5.869E7 | 487   | 54.5     | 5.15     |
| Q9W541    | EIF2B-epsilon protein OS=Drosophila melanogaster GN=eIF2B-epsilon PE=2 SV=1 - [Q9W541_DROME]                     | 0.00  | 6.73     | 1          | 1                 | 1          | 1      |         | 669   | 75.0     | 5.07     |
| Q9VLZ8    | Serpin 28B, isoform A OS=Drosophila melanogaster GN=Spn28B PE=3 SV=2 - [Q9VLZ8_DROME]                            | 0.00  | 6.08     | 1          | 1                 | 1          | 2      | 9.802E6 | 378   | 43.2     | 9.48     |
| Q9W1V8    | CG9893 protein OS=Drosophila melanogaster GN=l(2)06496 PE=2 SV=1 - [Q9W1V8_DROME]                                | 0.00  | 15.63    | 1          | 2                 | 2          | 3      |         | 192   | 21.5     | 4.67     |
| Q9VC63    | CG5789 OS=Drosophila melanogaster GN=CG5789-RA PE=2 SV=2 - [Q9VC63_DROME]                                        | 0.00  | 1.14     | 1          | 1                 | 1          | 1      |         | 1402  | 157.0    | 6.79     |
| Q9VFE7    | CG7262 OS=Drosophila melanogaster GN=Nup93-2 PE=2 SV=1 - [Q9VFE7_DROME]                                          | 0.00  | 0.88     | 1          | 1                 | 1          | 1      |         | 796   | 90.5     | 7.15     |
| Q9XYZ9    | CG16936 OS=Drosophila melanogaster GN=GstE12 PE=2 SV=1 - [Q9XYZ9_DROME]                                          | 0.00  | 7.62     | 1          | 2                 | 2          | 2      | 4.953E7 | 223   | 25.2     | 6.29     |
| A4V0X6    | CG10947, isoform B OS=Drosophila melanogaster GN=CG10947-RB PE=2 SV=1 - [A4V0X6_DROME]                           | 0.00  | 4.46     | 1          | 1                 | 1          | 1      | 4.969E5 | 404   | 45.7     | 5.45     |
| Q9VE77    | V-type proton ATPase subunit a OS=Drosophila melanogaster GN=Vha100-4 PE=2 SV=1 - [Q9VE77_DROME]                 | 0.00  | 2.73     | 1          | 1                 | 1          | 1      | 1.828E6 | 844   | 96.6     | 6.51     |
| Q9VTV2    | CG11529 OS=Drosophila melanogaster GN=CG11529 PE=2 SV=1 - [Q9VTV2_DROME]                                         | 0.00  | 11.15    | 1          | 1                 | 1          | 1      |         | 287   | 31.8     | 7.36     |
| Q9W3H4    | CG10964-PA OS=Drosophila melanogaster GN=sni PE=1 SV=1 - [Q9W3H4_DROME]                                          | 0.00  | 8.10     | 1          | 1                 | 1          | 1      |         | 247   | 26.5     | 8.65     |
| Q9VQS1    | CG8851, isoform A OS=Drosophila melanogaster GN=CG8851 PE=2 SV=2 - [Q9VQS1_DROME]                                | 0.00  | 3.42     | 2          | 2                 | 2          | 2      | 7.875E6 | 644   | 74.4     | 9.54     |
| Q9VVP2    | CG7320 OS=Drosophila melanogaster GN=CG7320-RA PE=2 SV=3 - [Q9VVP2_DROME]                                        | 0.00  | 2.63     | 1          | 1                 | 1          | 1      |         | 646   | 77.1     | 6.07     |
| Q7KIS4    | SP2637 OS=Drosophila melanogaster GN=SP2637 PE=2 SV=1 - [Q7KIS4_DROME]                                           | 0.00  | 6.45     | 2          | 1                 | 1          | 1      | 3.762E7 | 310   | 34.5     | 5.36     |
| Q86LG7    | Pickpocket 16 OS=Drosophila melanogaster GN=ppk16 PE=2 SV=1 - [Q86LG7_DROME]                                     | 0.00  | 8.10     | 1          | 1                 | 1          | 1      |         | 531   | 61.4     | 8.38     |
| P91634    | PI-3 kinase OS=Drosophila melanogaster GN=Pi3K92E PE=2 SV=1 - [P91634_DROME]                                     | 0.00  | 1.47     | 1          | 1                 | 1          | 1      |         | 1088  | 126.9    | 7.58     |
| Q6XK20    | Bitesize isoform 1 OS=Drosophila melanogaster GN=btsz PE=2 SV=1 - [Q6XK20_DROME]                                 | 0.00  | 1.54     | 7          | 2                 | 2          | 2      | 9.858E7 | 1102  | 121.4    | 8.91     |
| Q7K509    | CG8708, isoform A OS=Drosophila melanogaster GN=CG8708 PE=2 SV=1 - [Q7K509_DROME]                                | 0.00  | 9.68     | 2          | 1                 | 1          | 1      | 1.149E6 | 310   | 35.5     | 8.60     |
| Q9W4J6    | CG11436 OS=Drosophila melanogaster GN=CG11436 PE=2 SV=1 - [Q9W4J6_DROME]                                         | 0.00  | 7.53     | 1          | 1                 | 1          | 1      |         | 465   | 53.8     | 8.63     |
| Q7JVP4    | CG1845 OS=Drosophila melanogaster GN=Br140 PE=2 SV=1 - [Q7JVP4_DROME]                                            | 0.00  | 2.31     | 1          | 1                 | 1          | 1      |         | 1430  | 157.0    | 7.14     |



| Accession | Description                                                                                                    | Score | Coverage | # Proteins | # Unique Peptides | # Peptides | # PSMs | Area    | # AAs | MW [kDa] | calc. pI |
|-----------|----------------------------------------------------------------------------------------------------------------|-------|----------|------------|-------------------|------------|--------|---------|-------|----------|----------|
| Q7JWR4    | CG13319, isoform A OS=Drosophila melanogaster GN=CG13319 PE=2 SV=1 - [Q7JWR4_DROME]                            | 0.00  | 20.45    | 1          | 1                 | 1          | 2      |         | 132   | 14.3     | 8.50     |
| Q9VXZ0    | CG5548, isoform B OS=Drosophila melanogaster GN=CG5548 PE=2 SV=1 - [Q9VXZ0_DROME]                              | 0.00  | 12.82    | 1          | 2                 | 2          | 3      | 8.488E6 | 117   | 13.9     | 7.81     |
| Q85Y35    | CG8213, isoform B OS=Drosophila melanogaster GN=CG8213 PE=2 SV=1 - [Q85Y35_DROME]                              | 0.00  | 1.37     | 2          | 1                 | 1          | 1      |         | 1674  | 180.5    | 6.79     |
| Q00G30    | Sno oncogene, isoform B OS=Drosophila melanogaster GN=Snoo PE=2 SV=1 - [Q00G30_DROME]                          | 0.00  | 0.57     | 1          | 1                 | 1          | 1      | 3.412E8 | 1223  | 135.0    | 5.96     |
| Q9VUJ2    | FI21605p1 OS=Drosophila melanogaster GN=Reck PE=2 SV=2 - [Q9VUJ2_DROME]                                        | 0.00  | 5.14     | 1          | 2                 | 2          | 2      |         | 1071  | 117.7    | 7.02     |
| Q86BM0    | CG9515, isoform B OS=Drosophila melanogaster GN=CG9515 PE=3 SV=1 - [Q86BM0_DROME]                              | 0.00  | 5.26     | 1          | 1                 | 1          | 1      |         | 209   | 22.9     | 5.44     |
| Q7K2N0    | CG8735 OS=Drosophila melanogaster GN=CG8735 PE=2 SV=1 - [Q7K2N0_DROME]                                         | 0.00  | 4.65     | 1          | 1                 | 1          | 1      | 1.388E7 | 387   | 43.6     | 9.13     |
| Q9VTZ4    | LD02044p OS=Drosophila melanogaster GN=nst PE=2 SV=1 - [Q9VTZ4_DROME]                                          | 0.00  | 3.28     | 1          | 1                 | 1          | 1      | 1.650E8 | 549   | 60.5     | 6.29     |
| Q9VFX6    | CG8449 OS=Drosophila melanogaster GN=CG8449 PE=2 SV=1 - [Q9VFX6_DROME]                                         | 0.00  | 0.92     | 2          | 1                 | 1          | 1      |         | 654   | 74.3     | 6.39     |
| Q9VZX9    | Adenosylhomocysteinase OS=Drosophila melanogaster GN=CG9977-RA PE=2 SV=1 - [Q9VZX9_DROME]                      | 0.00  | 3.45     | 1          | 1                 | 1          | 1      |         | 521   | 56.9     | 6.79     |
| Q9VVF0    | AT21479p OS=Drosophila melanogaster GN=CG6485 PE=2 SV=1 - [Q9VVF0_DROME]                                       | 0.00  | 7.56     | 1          | 1                 | 1          | 1      | 1.366E6 | 238   | 26.7     | 8.90     |
| Q7JQ32    | Guanylate cyclase OS=Drosophila melanogaster GN=Gyc76C PE=2 SV=1 - [Q7JQ32_DROME]                              | 0.00  | 0.72     | 1          | 1                 | 1          | 1      | 1.060E7 | 1525  | 170.4    | 7.23     |
| Q9VFC2    | GH14439p OS=Drosophila melanogaster GN=Spn88Ea PE=2 SV=1 - [Q9VFC2_DROME]                                      | 0.00  | 2.11     | 1          | 1                 | 1          | 1      | 3.377E7 | 427   | 48.4     | 5.55     |
| Q0E908    | Hillarin, isoform A OS=Drosophila melanogaster GN=Hil PE=4 SV=1 - [Q0E908_DROME]                               | 0.00  | 2.20     | 1          | 1                 | 1          | 1      |         | 818   | 94.4     | 7.28     |
| Q9VB83    | CG14257 OS=Drosophila melanogaster GN=CG14257 PE=2 SV=2 - [Q9VB83_DROME]                                       | 0.00  | 3.29     | 1          | 1                 | 1          | 1      | 1.121E7 | 547   | 57.6     | 8.10     |
| A1Z6H9    | Dpr12 OS=Drosophila melanogaster GN=dpr12 PE=1 SV=3 - [A1Z6H9_DROME]                                           | 0.00  | 2.76     | 1          | 1                 | 1          | 1      | 8.315E6 | 326   | 36.9     | 8.27     |
| Q9VJZ7    | CG10431, isoform A OS=Drosophila melanogaster GN=CG10431 PE=4 SV=3 - [Q9VJZ7_DROME]                            | 0.00  | 4.33     | 1          | 1                 | 1          | 1      |         | 762   | 87.2     | 8.91     |
| Q24216    | Cyclin-dependent kinase 7 OS=Drosophila melanogaster GN=Cdk7 PE=2 SV=1 - [Q24216_DROME]                        | 0.00  | 7.37     | 1          | 1                 | 1          | 1      |         | 353   | 39.6     | 9.45     |
| Q9VEV7    | CG17565 OS=Drosophila melanogaster GN=CG17565 PE=2 SV=1 - [Q9VEV7_DROME]                                       | 0.00  | 2.39     | 1          | 1                 | 1          | 1      | 2.589E7 | 419   | 46.7     | 5.39     |
| Q7JQV9    | CG10953 OS=Drosophila melanogaster GN=CG10953 PE=2 SV=1 - [Q7JQV9_DROME]                                       | 0.00  | 8.27     | 1          | 1                 | 1          | 1      | 2.363E8 | 278   | 28.4     | 9.04     |
| Q9VSM8    | FI07835p OS=Drosophila melanogaster GN=GAPsec PE=2 SV=1 - [Q9VSM8_DROME]                                       | 0.00  | 5.96     | 1          | 1                 | 1          | 1      | 9.282E5 | 403   | 45.8     | 5.73     |
| Q9VUM1    | LD41209p OS=Drosophila melanogaster GN=Prp31 PE=2 SV=1 - [Q9VUM1_DROME]                                        | 0.00  | 2.59     | 1          | 1                 | 1          | 1      |         | 501   | 55.5     | 7.09     |
| Q9VZY0    | LD45195p OS=Drosophila melanogaster GN=Non2 PE=2 SV=1 - [Q9VZY0_DROME]                                         | 0.00  | 4.51     | 1          | 1                 | 1          | 2      | 1.635E7 | 244   | 27.5     | 6.32     |
| Q9W0R7    | Ada2a-containing complex component 3, isoform B OS=Drosophila melanogaster GN=Atac3 PE=4 SV=3 - [Q9W0R7_DROME] | 0.00  | 3.30     | 2          | 1                 | 1          | 1      | 7.692E6 | 576   | 63.2     | 7.99     |
| Q7JVY2    | Double parked OS=Drosophila melanogaster GN=dup PE=1 SV=1 - [Q7JVY2_DROME]                                     | 0.00  | 0.81     | 1          | 1                 | 1          | 1      | 4.685E6 | 743   | 83.4     | 9.76     |
| Q9VR17    | Blastoderm-specific gene 25A OS=Drosophila melanogaster GN=Bsg25A PE=2 SV=2 - [Q9VR17_DROME]                   | 0.00  | 5.51     | 1          | 1                 | 1          | 1      |         | 363   | 41.6     | 5.16     |
| Q9VJZ8    | CG10639, isoform A OS=Drosophila melanogaster GN=CG10639-RA PE=2 SV=1 - [Q9VJZ8_DROME]                         | 0.00  | 2.64     | 1          | 1                 | 1          | 1      |         | 455   | 50.1     | 8.59     |
| Q7KSQ2    | C-terminal Src kinase, isoform F OS=Drosophila melanogaster GN=Csk PE=4 SV=1 - [Q7KSQ2_DROME]                  | 0.00  | 2.77     | 3          | 1                 | 1          | 1      | 1.161E7 | 723   | 78.0     | 7.47     |
| Q9VNC3    | Holocarboxylase synthetase OS=Drosophila melanogaster GN=Hcs PE=2 SV=2 - [Q9VNC3_DROME]                        | 0.00  | 3.55     | 1          | 1                 | 1          | 1      |         | 1041  | 115.9    | 7.08     |
| Q9VKC3    | CG14945, isoform B OS=Drosophila melanogaster GN=CG14945 PE=4 SV=1 - [Q9VKC3_DROME]                            | 0.00  | 2.07     | 1          | 1                 | 1          | 1      | 1.135E9 | 482   | 54.8     | 6.90     |
| Q9VAR6    | CG14521 OS=Drosophila melanogaster GN=CG14521 PE=1 SV=1 - [Q9VAR6_DROME]                                       | 0.00  | 7.02     | 1          | 1                 | 1          | 1      |         | 413   | 45.3     | 8.50     |
| Q9VSL2    | Glutathione S transferase O3 OS=Drosophila melanogaster GN=GstO3 PE=2 SV=1 - [Q9VSL2_DROME]                    | 0.00  | 9.54     | 1          | 1                 | 1          | 1      |         | 241   | 27.7     | 6.95     |
| Q494G1    | CG9864 OS=Drosophila melanogaster GN=CG9864 PE=2 SV=1 - [Q494G1_DROME]                                         | 0.00  | 7.74     | 1          | 1                 | 1          | 1      |         | 465   | 51.4     | 7.62     |
| Q9VY08    | CG9518, isoform A OS=Drosophila melanogaster GN=CG9518-RA PE=2 SV=1 - [Q9VY08_DROME]                           | 0.00  | 3.27     | 1          | 1                 | 1          | 1      |         | 703   | 78.5     | 9.33     |
| Q7KT73    | CG18477 OS=Drosophila melanogaster GN=CG18477 PE=2 SV=1 - [Q7KT73_DROME]                                       | 0.00  | 2.80     | 1          | 1                 | 1          | 1      |         | 464   | 51.4     | 5.16     |
| Q9VMC7    | CG31638, isoform A OS=Drosophila melanogaster GN=CG9545 PE=2 SV=3 - [Q9VMC7_DROME]                             | 0.00  | 1.14     | 1          | 1                 | 1          | 1      | 1.776E7 | 704   | 79.7     | 6.80     |
| Q4ABH5    | CG33771 OS=Drosophila melanogaster GN=CG33771 PE=4 SV=3 - [Q4ABH5_DROME]                                       | 0.00  | 12.92    | 1          | 1                 | 1          | 1      |         | 178   | 20.6     | 9.57     |
| Q8IMP1    | CG31064, isoform A OS=Drosophila melanogaster GN=CG31064 PE=4 SV=1 - [Q8IMP1_DROME]                            | 0.00  | 3.75     | 3          | 1                 | 1          | 1      |         | 667   | 73.4     | 5.96     |
| A1ZA72    | Stretchin-Mlck, isoform D OS=Drosophila melanogaster GN=Strn-Mlck PE=4 SV=1 - [A1ZA72_DROME]                   | 0.00  | 0.42     | 2          | 1                 | 1          | 1      | 1.827E5 | 7210  | 808.5    | 5.10     |
| Q9VK52    | ACXB OS=Drosophila melanogaster GN=ACXB PE=4 SV=3 - [Q9VK52_DROME]                                             | 0.00  | 3.05     | 1          | 1                 | 1          | 1      |         | 1114  | 127.6    | 7.14     |
| A1ZAN7    | RhoGEF2, isoform E OS=Drosophila melanogaster GN=RhoGEF2 PE=4 SV=1 - [A1ZAN7_DROME]                            | 0.00  | 0.32     | 2          | 1                 | 1          | 1      | 9.997E6 | 2205  | 242.1    | 6.40     |
| Q9VXP5    | EFHC1 homologue 1 OS=Drosophila melanogaster GN=Efhc1.1 PE=4 SV=2 - [Q9VXP5_DROME]                             | 0.00  | 4.67     | 1          | 1                 | 1          | 2      |         | 793   | 90.8     | 7.05     |
| Q9W2B5    | CG34369 OS=Drosophila melanogaster GN=ppk9 PE=4 SV=2 - [Q9W2B5_DROME]                                          | 0.00  | 4.51     | 1          | 1                 | 1          | 2      |         | 599   | 68.1     | 7.56     |
| Q9W347    | C12.2, isoform A OS=Drosophila melanogaster GN=c12.2 PE=4 SV=3 - [Q9W347_DROME]                                | 0.00  | 1.80     | 2          | 1                 | 1          | 1      |         | 1386  | 155.6    | 7.09     |
| Q9I7S5    | CG2209-PA OS=Drosophila melanogaster GN=CG2209 PE=4 SV=2 - [Q9I7S5_DROME]                                      | 0.00  | 4.58     | 1          | 1                 | 1          | 1      | 1.142E8 | 153   | 17.9     | 9.70     |
| A1Z7C5    | CG14760 OS=Drosophila melanogaster GN=CG14760 PE=3 SV=1 - [A1Z7C5_DROME]                                       | 0.00  | 5.10     | 1          | 1                 | 1          | 1      |         | 529   | 57.8     | 6.61     |
| A1Z8L3    | CG7759, isoform A OS=Drosophila melanogaster GN=CG7759 PE=4 SV=1 - [A1Z8L3_DROME]                              | 0.00  | 1.97     | 1          | 1                 | 1          | 1      | 3.578E7 | 660   | 75.4     | 7.77     |
| A1Z9C4    | CG4744 OS=Drosophila melanogaster GN=CG4744 PE=4 SV=1 - [A1Z9C4_DROME]                                         | 0.00  | 0.73     | 1          | 1                 | 1          | 1      | 4.408E7 | 1503  | 171.3    | 6.74     |
| M9PDT1    | CG2861, isoform E OS=Drosophila melanogaster GN=CG2861 PE=4 SV=1 - [M9PDT1_DROME]                              | 0.00  | 1.66     | 3          | 2                 | 2          | 2      | 2.654E7 | 1873  | 208.5    | 9.77     |
| M9PGX7    | Succinyl-CoA:3-ketoacid-coenzyme A transferase OS=Drosophila melanogaster GN=SCOT PE=3 SV=1 - [M9PGX7_DROME]   | 0.00  | 3.56     | 3          | 1                 | 1          | 1      |         | 450   | 47.9     | 7.88     |

| Accession | Description                                                                                                            | Score | Coverage | # Proteins | # Unique Peptides | # Peptides | # PSMs | Area    | # AAs | MW [kDa] | calc. pI |
|-----------|------------------------------------------------------------------------------------------------------------------------|-------|----------|------------|-------------------|------------|--------|---------|-------|----------|----------|
| Q9VNN0    | Osiris 10, isoform A OS=Drosophila melanogaster GN=Osi10 PE=4 SV=1 - [Q9VNN0_DROME]                                    | 0.00  | 1.39     | 2          | 1                 | 1          | 1      |         | 576   | 63.1     | 7.24     |
| Q8IM95    | CG11155, isoform B OS=Drosophila melanogaster GN=CG11155 PE=4 SV=2 - [Q8IM95_DROME]                                    | 0.00  | 3.74     | 2          | 1                 | 1          | 1      |         | 855   | 98.4     | 6.07     |
| A8JNR2    | CG32082, isoform D OS=Drosophila melanogaster GN=CG32082 PE=4 SV=2 - [A8JNR2_DROME]                                    | 0.00  | 3.50     | 4          | 1                 | 1          | 1      | 3.485E7 | 629   | 69.6     | 9.17     |
| Q9VZ30    | CG11122 OS=Drosophila melanogaster GN=CG11122 PE=4 SV=3 - [Q9VZ30_DROME]                                               | 0.00  | 0.23     | 1          | 1                 | 1          | 1      | 6.471E7 | 3539  | 384.8    | 9.29     |
| A1Z617    | Bub1-related kinase OS=Drosophila melanogaster GN=BubR1 PE=4 SV=1 - [A1Z617_DROME]                                     | 0.00  | 1.16     | 1          | 1                 | 1          | 1      |         | 1460  | 165.0    | 6.33     |
| A1Z7J1    | Sticks and stones, isoform A OS=Drosophila melanogaster GN=sns PE=4 SV=1 - [A1Z7J1_DROME]                              | 0.00  | 0.47     | 2          | 1                 | 1          | 1      | 1.462E7 | 1479  | 161.8    | 7.75     |
| M9PE86    | CG43347, isoform D OS=Drosophila melanogaster GN=CG15295 PE=4 SV=1 - [M9PE86_DROME]                                    | 0.00  | 0.34     | 3          | 1                 | 1          | 1      | 1.664E7 | 2652  | 281.8    | 6.30     |
| M9PF85    | Required for cell differentiation 1 ortholog, isoform C OS=Drosophila melanogaster GN=Rcd-1 PE=4 SV=1 - [M9PF85_DROME] | 0.00  | 3.99     | 2          | 1                 | 1          | 1      |         | 301   | 33.8     | 7.33     |
| Q8INT3    | CG31544 OS=Drosophila melanogaster GN=CG31544 PE=4 SV=2 - [Q8INT3_DROME]                                               | 0.00  | 9.51     | 1          | 1                 | 1          | 1      |         | 263   | 29.6     | 9.14     |
| X2JG22    | CG7028, isoform D OS=Drosophila melanogaster GN=CG7028 PE=4 SV=1 - [X2JG22_DROME]                                      | 0.00  | 2.76     | 2          | 1                 | 1          | 1      |         | 906   | 103.9    | 9.48     |
| X2JDA8    | Suppressor of sable, isoform B OS=Drosophila melanogaster GN=su(s) PE=4 SV=1 - [X2JDA8_DROME]                          | 0.00  | 1.82     | 2          | 1                 | 1          | 2      |         | 1321  | 143.4    | 5.58     |
| A1Z8Q2    | CG13185, isoform B OS=Drosophila melanogaster GN=CG13185 PE=4 SV=1 - [A1Z8Q2_DROME]                                    | 0.00  | 0.70     | 2          | 2                 | 2          | 2      | 7.381E7 | 5303  | 604.8    | 5.25     |
| X2JAZ3    | Downstream of raf1, isoform B OS=Drosophila melanogaster GN=Dsor1 PE=4 SV=1 - [X2JAZ3_DROME]                           | 0.00  | 4.07     | 2          | 1                 | 1          | 1      |         | 393   | 43.5     | 6.21     |
| Q9VDR5    | CG4783 OS=Drosophila melanogaster GN=CG4783 PE=4 SV=1 - [Q9VDR5_DROME]                                                 | 0.00  | 23.26    | 1          | 1                 | 1          | 1      |         | 86    | 9.9      | 5.19     |
| A1Z9B2    | CG4714 OS=Drosophila melanogaster GN=CG4714 PE=4 SV=1 - [A1Z9B2_DROME]                                                 | 0.00  | 2.87     | 1          | 1                 | 1          | 1      |         | 732   | 83.6     | 5.06     |
| Q2MGL8    | CG33966 OS=Drosophila melanogaster GN=CG1211 PE=4 SV=1 - [Q2MGL8_DROME]                                                | 0.00  | 2.90     | 1          | 1                 | 1          | 2      | 1.160E7 | 310   | 35.8     | 6.43     |
| Q9VNF5    | 3-oxoacyl-[acyl-carrier-protein] synthase OS=Drosophila melanogaster GN=CG12170 PE=3 SV=1 - [Q9VNF5_DROME]             | 0.00  | 2.74     | 1          | 1                 | 1          | 1      |         | 438   | 46.3     | 7.88     |
| Q9VJP6    | CG15260 OS=Drosophila melanogaster GN=CG15260 PE=4 SV=3 - [Q9VJP6_DROME]                                               | 0.00  | 9.13     | 1          | 1                 | 1          | 1      |         | 230   | 26.4     | 8.44     |
| M9NDD0    | Rim2 ortholog, isoform D OS=Drosophila melanogaster GN=Rim2 PE=3 SV=1 - [M9NDD0_DROME]                                 | 0.00  | 6.62     | 3          | 1                 | 1          | 1      |         | 272   | 30.7     | 9.44     |
| M9PC19    | CG42268, isoform M OS=Drosophila melanogaster GN=CG42268 PE=4 SV=1 - [M9PC19_DROME]                                    | 0.00  | 2.08     | 6          | 1                 | 1          | 1      |         | 1200  | 129.2    | 5.67     |
| X2JHS3    | CG13366, isoform D OS=Drosophila melanogaster GN=CG13366 PE=4 SV=1 - [X2JHS3_DROME]                                    | 0.00  | 4.53     | 3          | 1                 | 1          | 3      | 1.796E6 | 949   | 105.3    | 5.15     |
| A8DYJ0    | Endophilin B, isoform D OS=Drosophila melanogaster GN=EndoB PE=4 SV=1 - [A8DYJ0_DROME]                                 | 0.00  | 5.74     | 4          | 1                 | 1          | 1      |         | 366   | 41.3     | 5.38     |
| Q9VG47    | Lipase OS=Drosophila melanogaster GN=CG11608 PE=3 SV=3 - [Q9VG47_DROME]                                                | 0.00  | 6.44     | 1          | 1                 | 1          | 3      |         | 435   | 49.5     | 8.56     |
| M9PID3    | CG3680, isoform D OS=Drosophila melanogaster GN=CG3680 PE=4 SV=1 - [M9PID3_DROME]                                      | 0.00  | 2.06     | 4          | 1                 | 1          | 2      | 1.103E7 | 923   | 99.6     | 6.89     |
| Q9VHB0    | CG8273 OS=Drosophila melanogaster GN=CG8273 PE=4 SV=1 - [Q9VHB0_DROME]                                                 | 0.00  | 2.40     | 1          | 1                 | 1          | 1      |         | 874   | 97.7     | 9.69     |
| Q9W2S8    | CG9806-PA OS=Drosophila melanogaster GN=CG9806 PE=4 SV=1 - [Q9W2S8_DROME]                                              | 0.00  | 1.54     | 1          | 1                 | 1          | 1      | 8.019E7 | 911   | 103.3    | 7.43     |
| Q9VXU8    | Grip128 OS=Drosophila melanogaster GN=Grip128 PE=4 SV=2 - [Q9VXU8_DROME]                                               | 0.00  | 1.28     | 1          | 1                 | 1          | 1      |         | 1092  | 127.3    | 6.49     |
| Q9VQM0    | Toucan, isoform A OS=Drosophila melanogaster GN=toc PE=4 SV=2 - [Q9VQM0_DROME]                                         | 0.00  | 4.49     | 10         | 3                 | 3          | 3      | 7.913E6 | 2162  | 234.0    | 8.76     |
| Q9VL48    | CG13131 OS=Drosophila melanogaster GN=CG13131 PE=4 SV=2 - [Q9VL48_DROME]                                               | 0.00  | 0.53     | 1          | 1                 | 1          | 3      | 3.847E8 | 1317  | 148.5    | 8.51     |
| Q9VX86    | CG8945 OS=Drosophila melanogaster GN=CG8945 PE=4 SV=1 - [Q9VX86_DROME]                                                 | 0.00  | 0.70     | 1          | 1                 | 1          | 1      | 3.349E7 | 1430  | 161.0    | 8.95     |
| Q9VVG9    | CG32176 OS=Drosophila melanogaster GN=CG32176 PE=4 SV=2 - [Q9VVG9_DROME]                                               | 0.00  | 3.10     | 1          | 1                 | 1          | 1      | 5.572E6 | 581   | 65.1     | 5.26     |
| Q9VB44    | CG3339, isoform D OS=Drosophila melanogaster GN=CG3339 PE=4 SV=3 - [Q9VB44_DROME]                                      | 0.00  | 0.53     | 2          | 2                 | 2          | 2      | 8.689E6 | 4689  | 536.6    | 6.51     |
| M9PC84    | Muscle-specific protein 300 kDa, isoform L OS=Drosophila melanogaster GN=Msp300 PE=4 SV=1 - [M9PC84_DROME]             | 0.00  | 0.24     | 9          | 1                 | 2          | 4      | 1.344E8 | ###   | 1400.3   | 5.22     |
| A1ZA45    | CG30089 OS=Drosophila melanogaster GN=CG30089 PE=4 SV=1 - [A1ZA45_DROME]                                               | 0.00  | 1.98     | 1          | 1                 | 1          | 1      |         | 1263  | 132.3    | 7.09     |
| A1ZAT2    | CG10764 OS=Drosophila melanogaster GN=CG10764 PE=3 SV=1 - [A1ZAT2_DROME]                                               | 0.00  | 6.50     | 1          | 1                 | 1          | 1      | 2.035E8 | 523   | 57.7     | 7.59     |
| X2JE64    | CG4198, isoform B OS=Drosophila melanogaster GN=CG4198 PE=4 SV=1 - [X2JE64_DROME]                                      | 0.00  | 6.93     | 2          | 1                 | 1          | 1      |         | 476   | 53.3     | 7.30     |
| Q9VM02    | Rap GTPase activating protein 1, isoform E OS=Drosophila melanogaster GN=RapGAP1 PE=4 SV=1 - [Q9VM02_DROME]            | 0.00  | 2.35     | 4          | 1                 | 1          | 1      | 3.560E6 | 850   | 92.8     | 7.12     |
| A8JR82    | CG31158, isoform C OS=Drosophila melanogaster GN=Efa6 PE=4 SV=1 - [A8JR82_DROME]                                       | 0.00  | 2.09     | 3          | 1                 | 1          | 1      | 7.822E5 | 1387  | 155.1    | 6.34     |
| E1JJ04    | Dynein heavy chain at 89D, isoform C OS=Drosophila melanogaster GN=Dhc98D PE=4 SV=1 - [E1JJ04_DROME]                   | 0.00  | 0.75     | 2          | 2                 | 2          | 2      | 5.364E7 | 5073  | 580.1    | 5.90     |
| M9NE79    | CG43055 OS=Drosophila melanogaster GN=CG43055 PE=4 SV=1 - [M9NE79_DROME]                                               | 0.00  | 8.89     | 1          | 1                 | 1          | 1      | 9.719E7 | 180   | 20.7     | 5.07     |
| Q5LJY8    | CG40467 (Fragment) OS=Drosophila melanogaster GN=CG40467 PE=4 SV=3 - [Q5LJY8_DROME]                                    | 0.00  | 10.04    | 1          | 1                 | 1          | 1      |         | 279   | 30.8     | 5.83     |
| Q9VS86    | CG16998 OS=Drosophila melanogaster GN=CG16998 PE=3 SV=2 - [Q9VS86_DROME]                                               | 0.00  | 3.88     | 1          | 1                 | 1          | 1      |         | 258   | 28.2     | 8.21     |
| A8DYT6    | CG15387 OS=Drosophila melanogaster GN=CG15387 PE=4 SV=1 - [A8DYT6_DROME]                                               | 0.00  | 18.97    | 1          | 1                 | 1          | 1      |         | 116   | 13.3     | 7.34     |
| M9NDR2    | Bicaudal D, isoform B OS=Drosophila melanogaster GN=BicD PE=4 SV=1 - [M9NDR2_DROME]                                    | 0.00  | 0.93     | 3          | 1                 | 1          | 1      |         | 750   | 85.5     | 5.05     |
| E1JIT1    | CG31169, isoform C OS=Drosophila melanogaster GN=CG31169 PE=3 SV=1 - [E1JIT1_DROME]                                    | 0.00  | 1.70     | 3          | 1                 | 1          | 1      | 9.221E6 | 1291  | 144.7    | 5.16     |
| Q9VGC0    | CG17404 OS=Drosophila melanogaster GN=CG17404 PE=3 SV=3 - [Q9VGC0_DROME]                                               | 0.00  | 11.27    | 1          | 1                 | 1          | 1      | 4.654E5 | 275   | 29.5     | 8.70     |
| X2JA59    | Spalt major, isoform B OS=Drosophila melanogaster GN=salm PE=4 SV=1 - [X2JA59_DROME]                                   | 0.00  | 0.52     | 2          | 1                 | 1          | 1      | 7.965E7 | 1355  | 148.9    | 6.51     |
| Q8ING0    | CG31326 OS=Drosophila melanogaster GN=CG31326 PE=3 SV=1 - [Q8ING0_DROME]                                               | 0.00  | 6.54     | 1          | 1                 | 1          | 1      |         | 520   | 57.2     | 6.92     |
| Q9VU38    | Adenosine kinase, isoform B OS=Drosophila melanogaster GN=AdenoK PE=4 SV=1 - [Q9VU38_DROME]                            | 0.00  | 2.03     | 2          | 1                 | 1          | 1      |         | 345   | 37.8     | 5.38     |
| Q9VU08    | CG32113 OS=Drosophila melanogaster GN=CG32113 PE=4 SV=3 - [Q9VU08_DROME]                                               | 0.00  | 0.54     | 1          | 2                 | 2          | 2      | 3.458E8 | 3919  | 444.8    | 6.83     |

| Accession | Description                                                                                                           | Score | Coverage | # Proteins | # Unique Peptides | # Peptides | # PSMs | Area    | # AAs | MW [kDa] | calc. pI |
|-----------|-----------------------------------------------------------------------------------------------------------------------|-------|----------|------------|-------------------|------------|--------|---------|-------|----------|----------|
| M9PEB1    | CG10289, isoform B OS=Drosophila melanogaster GN=CG10289 PE=4 SV=1 - [M9PEB1_DROME]                                   | 0.00  | 4.45     | 3          | 2                 | 2          | 2      | 6.768E6 | 967   | 108.4    | 4.50     |
| E1JIM1    | CG4699, isoform J OS=Drosophila melanogaster GN=ns1 PE=4 SV=1 - [E1JIM1_DROME]                                        | 0.00  | 2.78     | 4          | 2                 | 2          | 2      | 3.535E7 | 936   | 99.0     | 7.81     |
| A1Z8Z5    | CG33626 OS=Drosophila melanogaster GN=CG33626 PE=4 SV=2 - [A1Z8Z5_DROME]                                              | 0.00  | 14.37    | 1          | 1                 | 1          | 1      | 167     | 19.5  | 8.95     |          |
| A8DQW8    | CG42600 OS=Drosophila melanogaster GN=clos PE=4 SV=2 - [A8DQW8_DROME]                                                 | 0.00  | 0.84     | 1          | 1                 | 1          | 1      | 1.673E6 | 1785  | 201.0    | 6.07     |
| M9NDA6    | Lasp, isoform C OS=Drosophila melanogaster GN=Lasp PE=4 SV=1 - [M9NDA6_DROME]                                         | 0.00  | 3.77     | 2          | 1                 | 1          | 1      | 636     | 71.8  | 8.41     |          |
| A1Z9R6    | Additional sex combs, isoform B OS=Drosophila melanogaster GN=Asx PE=4 SV=1 - [A1Z9R6_DROME]                          | 0.00  | 1.28     | 2          | 1                 | 1          | 1      | 3.785E6 | 1560  | 168.6    | 6.42     |
| Q81MH9    | CG31019 OS=Drosophila melanogaster GN=CG31019 PE=4 SV=1 - [Q81MH9_DROME]                                              | 0.00  | 2.58     | 1          | 1                 | 1          | 1      | 659     | 74.2  | 9.17     |          |
| Q9VQ68    | CG42296 OS=Drosophila melanogaster GN=lectin-22C PE=4 SV=2 - [Q9VQ68_DROME]                                           | 0.00  | 1.41     | 1          | 1                 | 1          | 1      | 994     | 109.4 | 6.37     |          |
| Q9VW57    | Grasp65 OS=Drosophila melanogaster GN=Grasp65 PE=4 SV=1 - [Q9VW57_DROME]                                              | 0.00  | 6.30     | 1          | 1                 | 1          | 1      | 460     | 47.7  | 4.74     |          |
| M9PDJ0    | Klarsicht, isoform G OS=Drosophila melanogaster GN=klar PE=4 SV=1 - [M9PDJ0_DROME]                                    | 0.00  | 0.85     | 7          | 1                 | 1          | 1      | 4.634E7 | 1180  | 128.8    | 6.44     |
| Q81RL1    | CG32686-PA, isoform A OS=Drosophila melanogaster GN=CG32686 PE=4 SV=1 - [Q81RL1_DROME]                                | 0.00  | 3.20     | 2          | 1                 | 1          | 1      | 719     | 79.6  | 9.89     |          |
| Q9VNB7    | CG14669 OS=Drosophila melanogaster GN=CG14669 PE=4 SV=5 - [Q9VNB7_DROME]                                              | 0.00  | 1.96     | 1          | 1                 | 1          | 1      | 8.469E6 | 306   | 33.1     | 8.87     |
| M9PB77    | Sema-1a, isoform I OS=Drosophila melanogaster GN=Sema-1a PE=4 SV=1 - [M9PB77_DROME]                                   | 0.00  | 2.57     | 5          | 1                 | 1          | 1      | 3.800E7 | 817   | 92.1     | 6.71     |
| A1Z9C2    | CG17050 OS=Drosophila melanogaster GN=CG17050 PE=4 SV=1 - [A1Z9C2_DROME]                                              | 0.00  | 3.36     | 1          | 1                 | 1          | 2      | 506     | 58.9  | 9.25     |          |
| Q81RS0    | Protein tyrosine phosphatase 4E, isoform B OS=Drosophila melanogaster GN=Ptp4E PE=4 SV=1 - [Q81RS0_DROME]             | 0.00  | 1.43     | 4          | 1                 | 1          | 1      | 3.967E4 | 1607  | 182.2    | 6.47     |
| Q7PLB8    | CG17374 OS=Drosophila melanogaster GN=CG17374 PE=4 SV=3 - [Q7PLB8_DROME]                                              | 0.00  | 1.38     | 1          | 1                 | 1          | 1      | 1.124E6 | 2394  | 266.7    | 6.65     |
| Q2PDV8    | CG4822, isoform H OS=Drosophila melanogaster GN=CG4822 PE=4 SV=1 - [Q2PDV8_DROME]                                     | 0.00  | 19.09    | 4          | 1                 | 1          | 1      | 110     | 11.8  | 5.31     |          |
| Q9VWJ2    | CG8028, isoform D OS=Drosophila melanogaster GN=CG8028 PE=4 SV=3 - [Q9VWJ2_DROME]                                     | 0.00  | 4.94     | 2          | 1                 | 1          | 1      | 1.556E6 | 486   | 54.2     | 9.41     |
| A1ZBH2    | CG15111, isoform A OS=Drosophila melanogaster GN=CG15111 PE=4 SV=1 - [A1ZBH2_DROME]                                   | 0.00  | 9.41     | 2          | 1                 | 1          | 1      | 393     | 45.5  | 9.20     |          |
| A8DY94    | CG34363, isoform E OS=Drosophila melanogaster GN=CG12897 PE=4 SV=2 - [A8DY94_DROME]                                   | 0.00  | 1.01     | 2          | 1                 | 1          | 1      | 2.597E7 | 1774  | 194.5    | 7.52     |
| E1J1J7    | CG7518, isoform C OS=Drosophila melanogaster GN=CG7518 PE=4 SV=1 - [E1J1J7_DROME]                                     | 0.00  | 0.30     | 3          | 1                 | 1          | 1      | 2301    | 251.9 | 8.54     |          |
| M9PFI1    | CG7324, isoform B OS=Drosophila melanogaster GN=CG7324 PE=4 SV=1 - [M9PFI1_DROME]                                     | 0.00  | 1.83     | 2          | 1                 | 1          | 1      | 1256    | 143.2 | 5.97     |          |
| M9PFR5    | Suppressor of variegation 3-3, isoform C OS=Drosophila melanogaster GN=Su(var)3-3 PE=4 SV=1 - [M9PFR5_DROME]          | 0.00  | 3.56     | 2          | 1                 | 1          | 1      | 870     | 95.9  | 7.31     |          |
| Q9VCB7    | CG6204 OS=Drosophila melanogaster GN=CG6204 PE=4 SV=1 - [Q9VCB7_DROME]                                                | 0.00  | 3.10     | 1          | 1                 | 1          | 1      | 903     | 102.7 | 7.01     |          |
| Q2PDQ0    | CG34027 OS=Drosophila melanogaster GN=CG34027 PE=4 SV=2 - [Q2PDQ0_DROME]                                              | 0.00  | 0.39     | 1          | 1                 | 1          | 1      | 4.108E7 | 1519  | 173.9    | 7.17     |
| A8DYE4    | CG34365, isoform F OS=Drosophila melanogaster GN=CG34365 PE=4 SV=1 - [A8DYE4_DROME]                                   | 0.00  | 2.14     | 1          | 1                 | 1          | 1      | 2.788E8 | 1030  | 113.1    | 9.39     |
| E1J1L5    | Mitochondrial ribosomal protein S10, isoform D OS=Drosophila melanogaster GN=mRps10 PE=4 SV=1 - [E1J1L5_DROME]        | 0.00  | 4.00     | 4          | 1                 | 1          | 1      | 1.178E8 | 150   | 17.2     | 8.97     |
| V9H011    | Methuselah-like 13 OS=Drosophila melanogaster GN=mthl13 PE=4 SV=1 - [V9H011_DROME]                                    | 0.00  | 9.44     | 1          | 1                 | 1          | 2      | 413     | 49.0  | 5.57     |          |
| M9NFP9    | Formin homology 2 domain containing ortholog, isoform G OS=Drosophila melanogaster GN=Fhos PE=4 SV=1 - [M9NFP9_DROME] | 0.00  | 0.87     | 7          | 1                 | 1          | 1      | 1152    | 129.7 | 7.20     |          |
| Q9VML2    | Blue cheese OS=Drosophila melanogaster GN=bchs PE=4 SV=4 - [Q9VML2_DROME]                                             | 0.00  | 0.20     | 1          | 1                 | 1          | 1      | 9.575E6 | 3489  | 389.6    | 6.96     |
| X2JEX7    | Ubiquitin carboxyl-terminal hydrolase OS=Drosophila melanogaster GN=Usp7 PE=3 SV=1 - [X2JEX7_DROME]                   | 0.00  | 1.07     | 2          | 1                 | 1          | 1      | 1125    | 130.0 | 5.99     |          |
| Q81R47    | Hog OS=Drosophila melanogaster GN=hog PE=4 SV=1 - [Q81R47_DROME]                                                      | 0.00  | 27.52    | 1          | 1                 | 1          | 1      | 7.798E6 | 149   | 16.8     | 4.44     |
| A1Z7Y9    | CG33800 OS=Drosophila melanogaster GN=CheA46a PE=4 SV=1 - [A1Z7Y9_DROME]                                              | 0.00  | 15.82    | 1          | 1                 | 1          | 1      | 1.530E6 | 177   | 20.1     | 7.40     |
| A1Z7T9    | CG13739 OS=Drosophila melanogaster GN=CG13739 PE=4 SV=1 - [A1Z7T9_DROME]                                              | 0.00  | 3.77     | 1          | 1                 | 1          | 2      | 875     | 94.6  | 9.69     |          |
| M9PHE1    | CG2750, isoform C OS=Drosophila melanogaster GN=CG2750 PE=4 SV=1 - [M9PHE1_DROME]                                     | 0.00  | 0.58     | 2          | 1                 | 1          | 1      | 1881    | 209.2 | 6.49     |          |
| M9PBG8    | Rho guanine nucleotide exchange factor 3, isoform M OS=Drosophila melanogaster GN=RhoGEF3 PE=4 SV=1 - [M9PBG8_DROME]  | 0.00  | 1.25     | 2          | 2                 | 2          | 2      | 4.724E8 | 3518  | 383.6    | 9.09     |
| Q7KVB1    | ABCb7, isoform B OS=Drosophila melanogaster GN=ABCb7 PE=3 SV=1 - [Q7KVB1_DROME]                                       | 0.00  | 1.13     | 2          | 1                 | 1          | 1      | 1.132E7 | 709   | 76.7     | 9.26     |
| M9NGE4    | Mushroom body defect, isoform I OS=Drosophila melanogaster GN=mud PE=4 SV=1 - [M9NGE4_DROME]                          | 0.00  | 1.61     | 4          | 1                 | 1          | 1      | 2113    | 242.7 | 5.40     |          |
| Q7KU95    | Ankyrin 2, isoform M OS=Drosophila melanogaster GN=Ank2 PE=4 SV=1 - [Q7KU95_DROME]                                    | 0.00  | 2.08     | 18         | 2                 | 2          | 2      | 1.043E8 | 2404  | 264.6    | 6.19     |
| E1JH06    | CG30372, isoform C OS=Drosophila melanogaster GN=Asap PE=4 SV=1 - [E1JH06_DROME]                                      | 0.00  | 1.06     | 2          | 1                 | 1          | 1      | 1127    | 124.2 | 6.89     |          |
| Q9VIC6    | CG34127 OS=Drosophila melanogaster GN=CG32465 PE=4 SV=3 - [Q9VIC6_DROME]                                              | 0.00  | 1.12     | 1          | 1                 | 1          | 1      | 1159    | 125.1 | 8.21     |          |
| M9PBW8    | CG33125, isoform C OS=Drosophila melanogaster GN=CG33125 PE=4 SV=1 - [M9PBW8_DROME]                                   | 0.00  | 4.35     | 2          | 1                 | 1          | 1      | 736     | 86.5  | 9.58     |          |
| Q9W4J0    | CG12184, isoform A OS=Drosophila melanogaster GN=CG12184 PE=4 SV=3 - [Q9W4J0_DROME]                                   | 0.00  | 1.02     | 2          | 1                 | 1          | 1      | 981     | 110.2 | 9.69     |          |
| Q9VH49    | CG12419 OS=Drosophila melanogaster GN=CG12419 PE=4 SV=1 - [Q9VH49_DROME]                                              | 0.00  | 11.45    | 1          | 1                 | 1          | 1      | 1.182E8 | 131   | 14.2     | 9.74     |
| M9NDG8    | CG11236, isoform B OS=Drosophila melanogaster GN=CG11236 PE=4 SV=1 - [M9NDG8_DROME]                                   | 0.00  | 2.96     | 2          | 1                 | 1          | 1      | 5.112E6 | 338   | 37.3     | 7.36     |
| Q9VUY2    | CG13074 OS=Drosophila melanogaster GN=CG13074 PE=4 SV=1 - [Q9VUY2_DROME]                                              | 0.00  | 8.87     | 1          | 1                 | 1          | 1      | 451     | 50.4  | 5.58     |          |
| Q9VZG1    | Cuticular protein 64Ab OS=Drosophila melanogaster GN=Cpr64Ab PE=4 SV=2 - [Q9VZG1_DROME]                               | 0.00  | 10.83    | 1          | 1                 | 1          | 1      | 120     | 12.5  | 4.83     |          |
| Q9VWB9    | CG15618, isoform B OS=Drosophila melanogaster GN=CG15618 PE=4 SV=3 - [Q9VWB9_DROME]                                   | 0.00  | 0.40     | 1          | 1                 | 1          | 1      | 2.069E9 | 1746  | 197.2    | 6.84     |
| A8JR35    | Dscam3, isoform C OS=Drosophila melanogaster GN=Dscam3 PE=4 SV=1 - [A8JR35_DROME]                                     | 0.00  | 2.64     | 3          | 2                 | 2          | 2      | 2007    | 219.6 | 7.88     |          |
| M9PEB2    | Chromodomain-helicase-DNA-binding protein 1, isoform C OS=Drosophila melanogaster GN=Chd1 PE=4 SV=1 - [M9PEB2_DROME]  | 0.00  | 0.48     | 3          | 1                 | 1          | 1      | 1.491E7 | 1881  | 211.4    | 6.34     |

| Accession | Description                                                                                                   | Score | Coverage | # Proteins | # Unique Peptides | # Peptides | # PSMs | Area    | # AAs | MW [kDa] | calc. pI |
|-----------|---------------------------------------------------------------------------------------------------------------|-------|----------|------------|-------------------|------------|--------|---------|-------|----------|----------|
| M9PCJ9    | Sarcoglycan alpha, isoform B OS=Drosophila melanogaster GN=Scgalpha PE=4 SV=1 - [M9PCJ9_DROME]                | 0.00  | 4.19     | 3          | 1                 | 1          | 1      | 9.174E6 | 406   | 46.7     | 8.38     |
| Q9VV18    | CG13047 OS=Drosophila melanogaster GN=CG13047 PE=4 SV=2 - [Q9VV18_DROME]                                      | 0.00  | 8.24     | 1          | 1                 | 1          | 2      | 2.189E7 | 170   | 16.6     | 8.54     |
| Q9VHZ8    | CG18268 OS=Drosophila melanogaster GN=CG18268 PE=4 SV=1 - [Q9VHZ8_DROME]                                      | 0.00  | 4.75     | 1          | 1                 | 1          | 1      | 3.790E7 | 358   | 40.1     | 8.51     |
| Q9W135    | CG42360 OS=Drosophila melanogaster GN=CG42360 PE=4 SV=3 - [Q9W135_DROME]                                      | 0.00  | 2.02     | 1          | 1                 | 1          | 1      | 496     | 56.1  | 8.88     |          |
| Q9VAU5    | CG10011 OS=Drosophila melanogaster GN=CG10011 PE=4 SV=1 - [Q9VAU5_DROME]                                      | 0.00  | 0.90     | 1          | 1                 | 1          | 1      | 5.451E5 | 2119  | 232.9    | 6.28     |
| A1Z7P0    | Phosphomannomutase 45A, isoform B OS=Drosophila melanogaster GN=Pmm45A PE=3 SV=1 - [A1Z7P0_DROME]             | 0.00  | 1.88     | 2          | 1                 | 1          | 1      | 2.835E6 | 584   | 65.4     | 5.35     |
| B7Z0U7    | Like-AP180, isoform C OS=Drosophila melanogaster GN=lap PE=4 SV=2 - [B7Z0U7_DROME]                            | 0.00  | 4.35     | 3          | 2                 | 2          | 2      | 1.644E7 | 758   | 80.8     | 7.18     |
| Q8IMQ3    | CG31077 OS=Drosophila melanogaster GN=CG31077 PE=4 SV=2 - [Q8IMQ3_DROME]                                      | 0.00  | 2.43     | 1          | 1                 | 1          | 1      | 988     | 110.3 | 4.53     |          |
| M9PG46    | Ubiquitin carboxyl-terminal hydrolase OS=Drosophila melanogaster GN=CG8334 PE=3 SV=1 - [M9PG46_DROME]         | 0.00  | 1.42     | 4          | 1                 | 1          | 1      | 1693    | 189.2 | 6.40     |          |
| M9NE59    | CG43078, isoform G OS=Drosophila melanogaster GN=CG32355 PE=4 SV=1 - [M9NE59_DROME]                           | 0.00  | 0.77     | 1          | 1                 | 1          | 1      | 2455    | 274.4 | 5.38     |          |
| A1ZA27    | CG30466 OS=Drosophila melanogaster GN=CG30466 PE=4 SV=2 - [A1ZA27_DROME]                                      | 0.00  | 1.73     | 1          | 1                 | 1          | 1      | 1.295E8 | 404   | 47.5     | 8.65     |
| M9PFW7    | M6, isoform E OS=Drosophila melanogaster GN=M6 PE=4 SV=1 - [M9PFW7_DROME]                                     | 0.00  | 8.08     | 2          | 1                 | 1          | 1      | 297     | 34.0  | 7.87     |          |
| M9NEA5    | DNA-binding protein SATB OS=Drosophila melanogaster GN=ct PE=3 SV=1 - [M9NEA5_DROME]                          | 0.00  | 0.69     | 4          | 1                 | 1          | 1      | 5.799E7 | 2165  | 233.2    | 5.58     |
| Q8MLW8    | Cht12 OS=Drosophila melanogaster GN=Cht12 PE=3 SV=1 - [Q8MLW8_DROME]                                          | 0.00  | 5.11     | 1          | 1                 | 1          | 1      | 4.253E6 | 470   | 54.4     | 6.76     |
| Q9VPL6    | Kismet, isoform B OS=Drosophila melanogaster GN=kis PE=4 SV=1 - [Q9VPL6_DROME]                                | 0.00  | 1.91     | 6          | 2                 | 2          | 2      | 1.070E7 | 2151  | 224.6    | 6.21     |
| A8JUJ1    | Sec16 ortholog, isoform E OS=Drosophila melanogaster GN=Sec16 PE=4 SV=1 - [A8JUJ1_DROME]                      | 0.00  | 1.04     | 4          | 1                 | 1          | 1      | 2021    | 220.0 | 5.76     |          |
| Q0KI16    | Molting defective, isoform B OS=Drosophila melanogaster GN=mld PE=4 SV=1 - [Q0KI16_DROME]                     | 0.00  | 1.50     | 2          | 1                 | 1          | 1      | 6.229E6 | 1728  | 194.0    | 6.19     |
| Q9VVK7    | CG1075 OS=Drosophila melanogaster GN=CR1075 PE=3 SV=1 - [Q9VVK7_DROME]                                        | 0.00  | 2.92     | 1          | 1                 | 1          | 1      | 274     | 31.6  | 8.69     |          |
| Q8MMF3    | CG4329, isoform B OS=Drosophila melanogaster GN=CG4329 PE=4 SV=1 - [Q8MMF3_DROME]                             | 0.00  | 1.95     | 2          | 1                 | 1          | 1      | 1.877E7 | 667   | 78.2     | 5.53     |
| Q9W198    | CG3363 OS=Drosophila melanogaster GN=ocm PE=4 SV=1 - [Q9W198_DROME]                                           | 0.00  | 0.51     | 1          | 1                 | 1          | 1      | 5.263E9 | 2175  | 241.8    | 9.09     |
| M9NET6    | Pigment-dispersing factor receptor, isoform B OS=Drosophila melanogaster GN=Pdfr PE=4 SV=1 - [M9NET6_DROME]   | 0.00  | 1.90     | 1          | 1                 | 1          | 1      | 738     | 81.9  | 8.76     |          |
| X2JF83    | CG8184, isoform G OS=Drosophila melanogaster GN=CG8184 PE=4 SV=1 - [X2JF83_DROME]                             | 0.00  | 1.02     | 7          | 2                 | 2          | 2      | 5101    | 552.7 | 5.50     |          |
| Q59DZ3    | CG7147-PC, isoform C OS=Drosophila melanogaster GN=kuz PE=4 SV=1 - [Q59DZ3_DROME]                             | 0.00  | 1.38     | 4          | 1                 | 1          | 1      | 1090    | 121.1 | 8.21     |          |
| M9NE82    | Dumpy, isoform M OS=Drosophila melanogaster GN=dp PE=4 SV=1 - [M9NE82_DROME]                                  | 0.00  | 0.65     | 16         | 2                 | 2          | 2      | 1.126E6 | 8579  | 915.3    | 5.53     |
| M9NFK8    | CG12017, isoform B OS=Drosophila melanogaster GN=CG12017 PE=4 SV=1 - [M9NFK8_DROME]                           | 0.00  | 1.15     | 4          | 1                 | 1          | 1      | 522     | 57.3  | 5.17     |          |
| X2JIM3    | CG15894, isoform D OS=Drosophila melanogaster GN=CG15894 PE=4 SV=1 - [X2JIM3_DROME]                           | 0.00  | 1.27     | 4          | 1                 | 1          | 1      | 1493    | 157.3 | 8.66     |          |
| Q9VAS0    | CG14527 OS=Drosophila melanogaster GN=CG14527 PE=4 SV=1 - [Q9VAS0_DROME]                                      | 0.00  | 4.29     | 1          | 1                 | 1          | 1      | 2.439E6 | 700   | 81.1     | 6.35     |
| Q9VCZ9    | Neurexin 1, isoform A OS=Drosophila melanogaster GN=Nrx-1 PE=4 SV=1 - [Q9VCZ9_DROME]                          | 0.00  | 0.38     | 2          | 1                 | 1          | 1      | 1837    | 199.2 | 7.15     |          |
| Q7KS15    | Ubiquitin carboxyl-terminal hydrolase OS=Drosophila melanogaster GN=puf PE=3 SV=1 - [Q7KS15_DROME]            | 0.00  | 1.38     | 3          | 2                 | 2          | 2      | 2832    | 318.5 | 5.90     |          |
| E1JGN7    | Banca1, isoform E OS=Drosophila melanogaster GN=bl PE=4 SV=1 - [E1JGN7_DROME]                                 | 0.00  | 6.90     | 5          | 2                 | 2          | 3      | 6.197E7 | 493   | 49.8     | 8.35     |
| Q7KVK3    | Roundabout, isoform A OS=Drosophila melanogaster GN=robo PE=4 SV=1 - [Q7KVK3_DROME]                           | 0.00  | 1.43     | 2          | 1                 | 1          | 1      | 1395    | 151.7 | 7.24     |          |
| Q9W1R3    | CG3493 OS=Drosophila melanogaster GN=Golgin245 PE=4 SV=2 - [Q9W1R3_DROME]                                     | 0.00  | 1.14     | 1          | 1                 | 1          | 1      | 4.317E7 | 1489  | 170.0    | 5.20     |
| E1JJG4    | Anaphase promoting complex subunit 4, isoform C OS=Drosophila melanogaster GN=APC4 PE=4 SV=1 - [E1JJG4_DROME] | 0.00  | 3.10     | 2          | 1                 | 1          | 1      | 6.353E6 | 773   | 87.1     | 4.97     |
| M9PDX4    | CG13933, isoform B OS=Drosophila melanogaster GN=CG13933 PE=4 SV=1 - [M9PDX4_DROME]                           | 0.00  | 3.43     | 2          | 1                 | 1          | 1      | 4.960E7 | 670   | 77.0     | 8.16     |
| X2JCI0    | Fasciclin 2, isoform H OS=Drosophila melanogaster GN=Fas2 PE=4 SV=1 - [X2JCI0_DROME]                          | 0.00  | 1.92     | 5          | 1                 | 1          | 1      | 3.354E8 | 832   | 93.0     | 6.14     |
| Q9VVF0    | Ionotropic receptor 87a OS=Drosophila melanogaster GN=Ir87a PE=4 SV=1 - [Q9VVF0_DROME]                        | 0.00  | 3.23     | 1          | 1                 | 1          | 1      | 6.913E5 | 806   | 92.6     | 4.64     |
| Q9VAT1    | CG1647 OS=Drosophila melanogaster GN=CG1647 PE=4 SV=1 - [Q9VAT1_DROME]                                        | 0.00  | 1.96     | 1          | 1                 | 1          | 1      | 1222    | 136.0 | 4.89     |          |
| Q8MLS0    | CG13551, isoform C OS=Drosophila melanogaster GN=CG13551 PE=4 SV=1 - [Q8MLS0_DROME]                           | 0.00  | 13.79    | 2          | 1                 | 1          | 1      | 87      | 9.7   | 6.80     |          |
| Q9W246    | CG4554 OS=Drosophila melanogaster GN=CG4554 PE=4 SV=2 - [Q9W246_DROME]                                        | 0.00  | 0.55     | 1          | 1                 | 1          | 1      | 1.497E6 | 2733  | 311.7    | 7.74     |
| A1Z9P8    | CG10102 OS=Drosophila melanogaster GN=CR10102 PE=4 SV=1 - [A1Z9P8_DROME]                                      | 0.00  | 13.19    | 1          | 1                 | 1          | 1      | 3.920E6 | 182   | 21.7     | 7.06     |
| Q9VUM6    | Bestrophin 4 OS=Drosophila melanogaster GN=Best4 PE=4 SV=3 - [Q9VUM6_DROME]                                   | 0.00  | 2.85     | 1          | 1                 | 1          | 1      | 526     | 61.4  | 6.62     |          |
| A1Z916    | CG13344 OS=Drosophila melanogaster GN=CG13344 PE=4 SV=1 - [A1Z916_DROME]                                      | 0.00  | 2.94     | 1          | 1                 | 1          | 1      | 374     | 42.1  | 6.33     |          |
| A8DYM1    | CG11206, isoform D OS=Drosophila melanogaster GN=Liprin-gamma PE=4 SV=1 - [A8DYM1_DROME]                      | 0.00  | 3.05     | 3          | 1                 | 1          | 1      | 852     | 93.0  | 6.99     |          |
| Q9VCN6    | Cdc16 OS=Drosophila melanogaster GN=Cdc16 PE=4 SV=1 - [Q9VCN6_DROME]                                          | 0.00  | 1.95     | 1          | 1                 | 1          | 1      | 718     | 81.7  | 5.52     |          |
| M9PG56    | CG42674, isoform G OS=Drosophila melanogaster GN=CG13811 PE=4 SV=1 - [M9PG56_DROME]                           | 0.00  | 3.30     | 6          | 1                 | 1          | 1      | 4.431E6 | 848   | 93.2     | 7.74     |
| Q9VAS9    | APC-like OS=Drosophila melanogaster GN=Apc PE=4 SV=1 - [Q9VAS9_DROME]                                         | 0.00  | 0.54     | 1          | 1                 | 1          | 1      | 9.856E6 | 2417  | 261.1    | 5.64     |
| Q7KUK9    | CG17839, isoform B OS=Drosophila melanogaster GN=CG17839 PE=1 SV=2 - [Q7KUK9_DROME]                           | 0.00  | 1.57     | 1          | 1                 | 1          | 1      | 1656    | 178.4 | 6.35     |          |
| Q9VDG0    | Dynein heavy chain at 93AB OS=Drosophila melanogaster GN=Dhc93AB PE=4 SV=3 - [Q9VDG0_DROME]                   | 0.00  | 0.18     | 1          | 1                 | 1          | 1      | 1.306E8 | 4486  | 513.7    | 5.49     |
| Q9VXS2    | CG15599 OS=Drosophila melanogaster GN=CG15599 PE=4 SV=2 - [Q9VXS2_DROME]                                      | 0.00  | 3.97     | 1          | 1                 | 1          | 1      | 1.005E7 | 1057  | 116.4    | 9.92     |
| Q9VK08    | CG44085, isoform P OS=Drosophila melanogaster GN=CG44085 PE=4 SV=2 - [Q9VK08_DROME]                           | 0.00  | 1.20     | 2          | 1                 | 1          | 1      | 2246    | 251.5 | 4.87     |          |

| Accession | Description                                                                                            | Score | Coverage | # Proteins | # Unique Peptides | # Peptides | # PSMs | Area    | # AAs | MW [kDa] | calc. pI |
|-----------|--------------------------------------------------------------------------------------------------------|-------|----------|------------|-------------------|------------|--------|---------|-------|----------|----------|
| M9NDR1    | CG43120 OS=Drosophila melanogaster GN=CG43120 PE=4 SV=1 - [M9NDR1_DROME]                               | 0.00  | 9.44     | 1          | 1                 | 1          | 1      | 4.533E6 | 286   | 33.4     | 5.26     |
| Q9VR15    | CG3355, isoform A OS=Drosophila melanogaster GN=CG3355 PE=3 SV=1 - [Q9VR15_DROME]                      | 0.00  | 11.78    | 1          | 1                 | 1          | 1      | 1.453E7 | 314   | 34.4     | 9.11     |
| Q9VDL0    | Srp14, isoform B OS=Drosophila melanogaster GN=Srp14 PE=4 SV=2 - [Q9VDL0_DROME]                        | 0.00  | 14.68    | 1          | 1                 | 1          | 1      | 3.079E7 | 109   | 12.4     | 10.17    |
| E1JH95    | CG4966, isoform C OS=Drosophila melanogaster GN=HPS4 PE=4 SV=1 - [E1JH95_DROME]                        | 0.00  | 2.29     | 3          | 1                 | 1          | 1      |         | 828   | 93.1     | 6.80     |
| Q7KUH2    | Mucin 68Ca OS=Drosophila melanogaster GN=Muc68Ca PE=4 SV=1 - [Q7KUH2_DROME]                            | 0.00  | 1.31     | 1          | 2                 | 2          | 2      |         | 3135  | 308.9    | 4.11     |
| M9NDN5    | CG3280 OS=Drosophila melanogaster GN=CG3280 PE=4 SV=1 - [M9NDN5_DROME]                                 | 0.00  | 0.93     | 1          | 1                 | 1          | 1      | 9.673E7 | 1932  | 216.5    | 6.57     |
| M9PIA6    | Mi-2, isoform D OS=Drosophila melanogaster GN=Mi-2 PE=4 SV=1 - [M9PIA6_DROME]                          | 0.00  | 1.12     | 3          | 1                 | 1          | 1      |         | 1973  | 223.0    | 5.76     |
| M9PDL0    | CG3630, isoform B OS=Drosophila melanogaster GN=CG3630 PE=4 SV=1 - [M9PDL0_DROME]                      | 0.00  | 6.63     | 2          | 1                 | 1          | 1      |         | 347   | 36.9     | 5.01     |
| Q9VBR8    | CG11902 OS=Drosophila melanogaster GN=CG11902 PE=4 SV=2 - [Q9VBR8_DROME]                               | 0.00  | 1.19     | 1          | 1                 | 1          | 1      |         | 1426  | 165.8    | 7.66     |
| M9NDF0    | Poor gastrulation, isoform E OS=Drosophila melanogaster GN=pog PE=4 SV=1 - [M9NDF0_DROME]              | 0.00  | 3.24     | 4          | 1                 | 1          | 1      | 3.884E6 | 894   | 98.9     | 7.99     |
| Q9VV61    | CG33158 OS=Drosophila melanogaster GN=CG33158 PE=4 SV=3 - [Q9VV61_DROME]                               | 0.00  | 1.26     | 1          | 1                 | 1          | 1      |         | 1033  | 115.4    | 5.90     |
| M9PFE5    | CG10732, isoform D OS=Drosophila melanogaster GN=CG10732 PE=4 SV=1 - [M9PFE5_DROME]                    | 0.00  | 2.52     | 4          | 2                 | 2          | 2      |         | 1624  | 180.3    | 5.68     |
| Q9VWZ3    | CG7092-PA OS=Drosophila melanogaster GN=Dhc16F PE=4 SV=1 - [Q9VWZ3_DROME]                              | 0.00  | 0.59     | 1          | 1                 | 1          | 1      |         | 4081  | 468.8    | 6.37     |
| Q9VF50    | CG18516 OS=Drosophila melanogaster GN=CG18516 PE=4 SV=1 - [Q9VF50_DROME]                               | 0.00  | 1.35     | 1          | 1                 | 1          | 1      | 1.035E7 | 1256  | 138.5    | 6.04     |
| Q59DY2    | CG33510 OS=Drosophila melanogaster GN=CG33510 PE=4 SV=2 - [Q59DY2_DROME]                               | 0.00  | 1.64     | 1          | 1                 | 1          | 1      | 6.233E7 | 426   | 49.8     | 5.69     |
| Q9VHT6    | CG9626 OS=Drosophila melanogaster GN=CG9626 PE=4 SV=2 - [Q9VHT6_DROME]                                 | 0.00  | 0.84     | 1          | 1                 | 1          | 1      |         | 1667  | 184.1    | 8.84     |
| A1Z6P0    | CG9430 OS=Drosophila melanogaster GN=Zip42C.2 PE=4 SV=1 - [A1Z6P0_DROME]                               | 0.00  | 10.82    | 1          | 1                 | 1          | 1      | 2.141E6 | 305   | 33.9     | 7.97     |
| Q9VZ77    | CG17150, isoform D OS=Drosophila melanogaster GN=CG17150 PE=4 SV=3 - [Q9VZ77_DROME]                    | 0.00  | 0.82     | 1          | 2                 | 2          | 4      | 9.187E7 | 4385  | 504.3    | 6.24     |
| X2JCN4    | Kugelei, isoform E OS=Drosophila melanogaster GN=kug PE=4 SV=1 - [X2JCN4_DROME]                        | 0.00  | 0.68     | 2          | 1                 | 1          | 1      | 1.962E6 | 4689  | 522.4    | 5.07     |
| A1ZAV2    | CG18631 OS=Drosophila melanogaster GN=CG18432 PE=4 SV=1 - [A1ZAV2_DROME]                               | 0.00  | 4.24     | 1          | 1                 | 1          | 1      | 2.302E5 | 519   | 60.0     | 7.06     |
| Q9VU57    | CG17687 OS=Drosophila melanogaster GN=CG17687 PE=4 SV=1 - [Q9VU57_DROME]                               | 0.00  | 0.97     | 1          | 1                 | 1          | 2      | 1.716E8 | 1544  | 179.3    | 8.51     |
| M9PE54    | CG3597, isoform B OS=Drosophila melanogaster GN=CG3597 PE=4 SV=1 - [M9PE54_DROME]                      | 0.00  | 6.53     | 1          | 1                 | 1          | 1      |         | 337   | 38.0     | 6.54     |
| Q7KTG2    | Apolipoprotein lipid transfer particle OS=Drosophila melanogaster GN=Apoltp PE=4 SV=2 - [Q7KTG2_DROME] | 0.00  | 0.39     | 1          | 1                 | 1          | 1      | 1.431E7 | 4333  | 494.0    | 6.33     |
